# Supplementary material for: Long-Term Dietary Fish Meal Substitution with the Black Soldier Fly Larval Meal Modifies the Caecal Microbiota and Microbial Pathway in Laying Hens
Source: Animals (Basel). 2023 Aug 15;13(16):2629. doi: 10.3390/ani13162629 (PMC10451910; doi:10.3390/ani13162629)
Supplement: Supplementary file 1 [file animals-13-02629-s001.zip › Supplementary Table S1.pdf]

**Table S1.** Diet Ingredients and proximate nutrients <sup>1</sup>

| Ingredients<br>(% in fresh matter)                       | Control | 1.5% BSFL diet | 3% BSFL diet |
|----------------------------------------------------------|---------|----------------|--------------|
| Maize grain                                              | 59.0    | 59.0           | 59.0         |
| Soybean meal                                             | 21.0    | 21.0           | 21.0         |
| Calcium carbonate                                        | 8.0     | 8.0            | 8.0          |
| Rice bran                                                | 4.0     | 4.0            | 4.0          |
| Fish meal                                                | 3.0     | 1.5            | 0.0          |
| BSFL meal                                                | 0.0     | 1.5            | 3.0          |
| Corn oil                                                 | 2.0     | 2.0            | 2.0          |
| Salt                                                     | 1.0     | 1.0            | 1.0          |
| Tricalcium phosphate                                     | 1.0     | 1.0            | 1.0          |
| Vitamin and mineral mix                                  | 1.0     | 1.0            | 1.0          |
| Proximate nutrients (% in dry matter) and energy content |         |                |              |
| Dry matter <sup>2</sup>                                  | 88.0    | 88.0           | 88.0         |
| Crude protein <sup>2</sup>                               | 19.1    | 19.1           | 19.8         |
| Crude fat <sup>2</sup>                                   | 6.2     | 6.2            | 6.5          |
| Crude fiber <sup>2</sup>                                 | 3.7     | 3.4            | 3.4          |
| Crude ash <sup>2</sup>                                   | 12.4    | 12.2           | 12.6         |
| NFE <sup>3</sup>                                         | 46.6    | 47.0           | 45.7         |
| ME (Mcal/kg) <sup>3</sup>                                | 3.27    | 3.29           | 3.29         |

BSFL = Black Soldier Fly Larvae; NFE = Nitrogen Free Extract; ME = Metabolizable Energy.

<sup>1</sup> Note. Data from “Egg quality and laying performance of Julia laying hens fed with black soldier fly (*Hermetia illucens*) larvae meal as a long-term substitute for fish meal” by Zhao *et al.*, 2022, *Poultry science* 101, 101986. Copyright (2022) by Elsevier Inc.

<sup>2</sup> Analyzed data.

<sup>3</sup> Calculated data.
