# Supplementary material for: Long-Term Dietary Fish Meal Substitution with the Black Soldier Fly Larval Meal Modifies the Caecal Microbiota and Microbial Pathway in Laying Hens
Source: Animals (Basel). 2023 Aug 15;13(16):2629. doi: 10.3390/ani13162629 (PMC10451910; doi:10.3390/ani13162629)
Supplement: Supplementary file 1 [file animals-13-02629-s001.zip › Supplementary Table S2.pdf]

**Table S2.** The performance of laying hens with different dietary treatments <sup>1</sup>

| Item                         | Diets                          |                                 |                                |
|------------------------------|--------------------------------|---------------------------------|--------------------------------|
|                              | Control diet                   | 1.5% BSFL diet                  | 3.0% BSFL diet                 |
| Body weight (g) <sup>2</sup> | 1455.79 ± 117.287 <sup>a</sup> | 1545.03 ± 176.932 <sup>ab</sup> | 1573.86 ± 133.878 <sup>b</sup> |
| Feed intake (g) <sup>2</sup> | 133.48 ± 4.955                 | 134.59 ± 3.969                  | 137.28 ± 1.661                 |
| Laying rate (%) <sup>2</sup> | 83.84 ± 5.547                  | 85.61 ± 11.261                  | 83.84 ± 5.647                  |
| Egg weight (g) <sup>3</sup>  | 56.59 ± 0.363 <sup>b</sup>     | 58.20 ± 0.263 <sup>a</sup>      | 59.16 ± 0.679 <sup>a</sup>     |
| Mortality (%) <sup>4</sup>   | 17.50 ± 6.083                  | 16.50 ± 9.330                   | 10.44 ± 1.166                  |

<sup>1</sup>Note. Data from “Egg quality and laying performance of Julia laying hens fed with black soldier fly (*Hermetia illucens*) larvae meal as a long-term substitute for fish meal” by Zhao *et al.*, 2022, *Poultry science* 101, 101986. Copyright (2022) by Elsevier Inc.

<sup>2</sup>The analysis was performed with the mean of the performance of all individuals in each group over 4 weeks; Control diet: n = 24; 1.5% BSFL meal diet: n = 24; 3.0% BSFL meal diet: n = 26.

<sup>3</sup>The analysis was performed with the mean of the twelve eggs that close to the average value of all eggs weight in each group, n = 12.

<sup>4</sup>The analysis was performed with three replicates in each dietary treatment.

Data: mean ± SD; Mean values within a row with different superscripts letters represent the statistical differences ( $P < 0.05$ ).
