# Supplementary material for: Long-Term Dietary Fish Meal Substitution with the Black Soldier Fly Larval Meal Modifies the Caecal Microbiota and Microbial Pathway in Laying Hens
Source: Animals (Basel). 2023 Aug 15;13(16):2629. doi: 10.3390/ani13162629 (PMC10451910; doi:10.3390/ani13162629)
Supplement: Supplementary file 1 [file animals-13-02629-s001.zip › Supplementary Table S3.xlsx]

## Sheet: Sheet1
Table S3. The KEGG pathways of caecal microbiota from laying hens with different dietary treatments
Kegg orthology	KEGG pathways	pathway gene counts
		C diet															L diet															H diet
		Sample1	Sample2	Sample3	Sample4	Sample5	Sample6	Sample7	Sample8	Sample9	Sample10	Sample11	Sample12	Sample13	Sample14	Sample15	Sample1	Sample2	Sample3	Sample4	Sample5	Sample6	Sample7	Sample8	Sample9	Sample10	Sample11	Sample12	Sample13	Sample14	Sample15	Sample1	Sample2	Sample3	Sample4	Sample5	Sample6	Sample7	Sample8	Sample9	Sample10	Sample11	Sample12	Sample13	Sample14	Sample15
K00001	E1.1.1.1; alcohol dehydrogenase	13509.7	15524.8	10097.1	12066.2	11686.4	10163.3	12206.8	12551.4	16331.9	11362.2	12189.4	10120.9	13136.8	12693.5	13814.7	13832	11668.3	11624.8	13532.2	9690.75	12743.8	11419.8	11655	12395.8	11315.9	11833	10672.3	13620	14003.7	13497.7	10954.2	14357.3	9312.65	12557.8	9554.96	8784.66	10750.5	12796.8	7743.38	11079.5	11583.9	11152.2	13913.5	12019.1	14330.9
K00002	AKR1A1; alcohol dehydrogenase (NADP+)	172.141	241.186	155.839	130.877	159.27	177.948	136.631	193.196	186.507	201.207	198.574	222.753	207.873	155.323	171.365	230.888	259.628	160.735	163.529	174.527	212.349	222.892	188.265	133.537	152.618	251.986	217.309	177.86	231.813	206.815	243.835	234.121	243.645	138.866	194.377	192.7	236.709	200.55	173.138	290.863	234.329	142.354	179.004	195.916	156.765
K00003	hom; homoserine dehydrogenase	12182.4	13599.7	11887.1	11391.7	11246.6	11998.2	9957.93	14244.3	17965.2	10191.2	13803.1	17934.9	13771.9	11348.4	13203.1	14581.9	19727.1	11931	11939.4	11285.7	13705.7	12626.6	13185.7	12207.7	10744.4	12516.4	15552.3	12829.6	15922.1	15232.3	17284.1	14082.9	13992.7	11854.3	14107.4	11629.8	13143.7	12475.8	9709.31	13523.5	12949.2	10247.3	12996.4	12233.6	11648.8
K00004	BDH; (R,R)-butanediol dehydrogenase / meso-butanediol dehydrogenase / diacetyl reductase	1709.85	1837.25	1377.01	1642.32	1483.81	1386.04	1580.65	2061.55	2551.75	1663.47	2187.58	3763.77	1974.86	1644.97	1626.68	2142.56	3725.32	1574.76	1514.15	1845.71	2215.23	2027.14	1797.34	1310.49	1559.33	2168.92	2600.94	1983.91	3118.55	2070.24	2985.19	1537.16	3063.43	1515.69	2032.32	1832.74	2301.11	1317.52	1694.74	2477.72	2514.08	1427.14	1670.14	1828.11	1716.89
K00005	gldA; glycerol dehydrogenase	6425.38	7375.48	6536.79	6175.35	6566.76	5802.17	5927.3	8512.51	9742.92	6403.08	7840.68	11742.9	7600.63	6057.44	7335.17	8607.76	12420.5	7349.52	7176.02	6885.21	8397.75	6784.02	7778.36	6456.54	5904.88	8230.85	9027.5	8100.37	9985.86	8555.73	9641.07	7512.81	8546.8	6438.44	7391.92	8189.91	8180.49	6233.06	5462.46	7922.75	7378.93	5564.36	6306.78	6760.85	6571.71
K00006	GPD1; glycerol-3-phosphate dehydrogenase (NAD+)	0.014361	0.00561384	0.00129667	0.0155494	0.00485872	0.00658711	0.0141444	0.0170612	0.0105824	0.00583046	0.0406012	0.0421129	0.00334847	0.0156577	0.00485872	0.00928571	0.0125259	0.00561384	0.00399528	0.00809888	0.00172839	0.00172839	0.00388697	0.00151177	0.014146	0.0111224	0.0114458	0.00820566	0.0219199	0.0186813	0.00356357	0.00367188	0.00766716	0.00410359	0.0119874	0.00194349	0.00939402	0.00583046	0.00475193	0.0116624	0.0701882	0.010259	0.00345526	0.00324016	0.0138225
K00007	dalD; D-arabinitol 4-dehydrogenase	1.49088	0.0900611	0.0357571	0.00128422	0.0226115	0.00186836	0.00116818	0.00182268	0.000873993	2.25827	0.00360178	0.00471093	0.013421	1.27561	0.000401278	0.0022756	0.00527811	2.36866	0.000906627	0.0147413	0.000142747	0.462563	0.00145572	0.0107494	0.684475	1.15446	0.000945303	0.0176521	0.0919765	3.81957	0.641851	0.264904	0.000633226	0.000338913	0.00550909	0.000822678	0.00135549	0.00141059	0.00145925	0.692889	11.97	3.70317	0.00100756	0.000267603	0.0011416
K00008	SORD; L-iditol 2-dehydrogenase	10355	11410.1	9979.76	9620.64	8694.56	8800.57	8121.39	12464.7	12805	8932.34	11906.1	19927.1	11614.5	9952.44	10094	12335.1	18866.7	11142.5	9654.77	9720.42	11394.1	12085.5	10835	8285.88	9607.74	13046.8	14101.7	12527.5	14475.3	14857.9	15934.4	10871.4	14224.4	8280.97	12332.3	10725.2	12665.4	9264.91	9007.19	11986.7	14444.3	8506.06	9738.04	9760.47	8544.71
K00009	mtlD; mannitol-1-phosphate 5-dehydrogenase	1208.23	1463.09	1136.84	777.345	1470.82	839.455	818.073	1374.68	1382.43	990.832	1257.53	1883.63	1115.15	1249.87	1162.93	1404.93	2074.61	1285.49	1318.7	1329.62	1672.74	1633.65	1230.97	1060.22	1180.39	1551.55	1630.04	1795.4	2668.65	1642.56	1758.31	1801.25	1304.88	1492.8	1617.03	1273.41	1318.98	1421.38	1263.59	1459.32	1937.15	1417.23	1260.06	1429.54	1397.05
K00010	iolG; myo-inositol 2-dehydrogenase / D-chiro-inositol 1-dehydrogenase	4398.7	3970.87	3974.28	4237.76	3595.8	3444.8	4113.25	4573.06	5731.32	3995.66	4555.77	6353.45	5562.88	4587.46	4081.9	5199.96	5987.04	4754.52	5214.1	3917.13	4652.89	6106.8	4205.07	3768.82	4373.01	5014.11	5712.61	5970.32	6138.74	5811.07	5839.66	4596.26	5472.45	4197.39	4799.66	3456.81	4806.03	4574.25	4033.86	4814.55	5332.33	4265.53	4514.42	3760.03	4735.88
K00011	AKR1B; aldehyde reductase	18.6782	6.8102	7.62635	15.3035	4.43797	10.3979	16.563	8.49352	17.2985	13.5617	21.4713	6.04395	13.5498	15.0139	12.8619	11.3173	3.31759	21.1927	16.6246	9.27955	10.345	13.221	12.7719	8.2928	17.3637	14.2417	11.9007	11.4737	19.1845	24.6157	5.63256	8.79276	6.68489	5.40063	12.4472	8.63713	9.56436	14.6805	7.49099	14.8783	18.6518	36.5388	14.1133	13.519	10.5222
K00012	UGDH; UDPglucose 6-dehydrogenase	24189.4	25545.4	17974	22172.7	19575.8	16015.1	20882.5	22575.8	29235.6	21452.4	24141.2	18405.6	25392.6	22891	24162.5	24170.1	22853.1	17114.1	21896	17900	21416	20843	22513.2	19753.8	21653.6	19792.9	19111.5	23845.2	24299.1	21603.8	20151	23209.3	17927.7	18355.5	17573	16024.3	20084	20480.3	12529.8	19534.5	16551.4	19317.5	23095	21257.2	25841.1
K00013	hisD; histidinol dehydrogenase	16553.6	19644.5	14743.5	16102.6	14907.7	13432.1	14894.3	17968.2	21700.3	14782	17702.3	17961	18198.5	15910.6	17650.6	19101.9	20616.6	14947.6	16565.3	13699	17226.7	15849.5	16539.9	15623	14877.2	15681.8	16872.2	17576.4	18526.1	18268.2	18460.7	18312.2	15797.3	14219.7	15983.9	13491	16370.2	15748.2	11206.2	15450.4	15481.7	14032.8	17524.6	15888.3	17125.8
K00014	aroE; shikimate dehydrogenase	20173	21973.3	17295	18628.2	16788.5	15800.8	16975.9	20992.7	25976	17291.9	20912	21885.2	21255.9	18552.1	20924.1	21917.6	23952.3	17425.6	19426	16198.1	19565.7	19059.9	19713.6	17581.9	17668.3	18690.9	20317.8	20661	21618.6	20953.7	21896.1	21173	18490.2	16432.8	18815.3	15664	18876.9	18385.1	13508.7	18630.5	17594.5	16746.8	20427.6	18708	19694.7
K00015	gyaR; glyoxylate reductase	443.701	1104.93	677.766	452.676	681.007	518.381	702.967	665.114	737.461	480.809	730.39	990.794	477.115	594.779	723.171	699.826	1048.7	565.732	597.386	421.601	670.8	719.653	672.103	333.751	559.663	678.441	710.295	447.804	774.614	795.153	747.513	598.043	537.377	485.778	508.379	572.129	571.961	604.312	329.658	588.427	774.74	655.358	551.388	602.244	754.56
K00016	LDH; L-lactate dehydrogenase	11750.8	11669.1	9921.38	9000.59	10126.1	13231.6	8345.3	13286.7	18229.3	8728.27	11339.6	16751.5	11574.6	9621.95	11528.3	12924.2	19541.9	9068.23	10765.9	11224.3	14078.8	10705.8	11940.4	9756.94	9495.33	10795.9	14353.3	10992.2	16255.6	11361.8	15273.7	12969.9	13246.4	13897.4	11526.1	11051.2	10936	12537.6	9729.1	13360.7	10680.7	8619.92	10680.2	11473.7	10878.2
K00018	hprA; glycerate dehydrogenase	12844.7	13172.5	10263.2	12046.3	10706.9	9292.69	11131.4	13423.9	15820.9	11178.4	13354.5	13058.8	13393.9	12028.1	13263.8	13712.5	14325.3	10029.3	11901.8	10122.1	12075.1	11088.6	12501.9	10707.8	11181.1	11251.2	12124.8	12697.6	13058.1	11785.3	13933.3	12092.2	11719.2	10452	11070.4	9572.05	11503.2	11201.2	8053.51	11263.4	8897.36	10072.7	11662.5	11568.9	13027.7
K00019	BDH1; 3-hydroxybutyrate dehydrogenase	327.686	447.026	685.037	342.491	480.324	301.615	278.527	462.833	442.543	347.334	382.733	821.096	327.023	642.794	374.115	512.764	711.109	456.513	348.672	284.803	749.018	491.558	392.543	316.771	474.918	516.883	819.084	386.103	570.644	699.762	1128.5	374.069	778.591	283.819	596.722	393.659	634.684	397.58	414.631	438.809	551.598	420.113	421.712	591.874	249.958
K00020	HIBADH; 3-hydroxyisobutyrate dehydrogenase	4756.77	5064.17	4178.45	4416.9	4501.94	4891.9	4297.57	5515.39	7558.13	3861.5	5927.64	6593.23	5865.57	4739.44	5507.09	5676.9	7227.73	4855.43	4946.7	4586.09	5374.83	4809.46	4990	5511.43	4006.91	4605.18	5824.3	4935.39	7334.14	6067.17	6261.14	6123.5	4490.51	5291.91	5633.71	4878.3	4877.04	5071.49	3698.99	5503.72	5185.62	4006.84	5063.99	4446.31	5304.95
K00021	HMGCR; hydroxymethylglutaryl-CoA reductase (NADPH)	182.133	99.8011	63.0993	112.532	140.968	135.998	48.285	243.245	185.502	128.18	138.809	109.374	33.7267	113.433	128.185	84.87	104.791	114.237	1.68286	82.459	79.0533	59.5107	171.343	56.0123	106.26	75.3561	28.1611	64.9353	94.2966	184.838	154.632	34.0669	190.256	39.6541	115.211	58.8258	33.8862	7.82504	12.8688	38.2795	134.194	116.6	15.8446	29.1765	68.7488
K00022	HADH; 3-hydroxyacyl-CoA dehydrogenase	6.81605	0.0511593	1.22822	2.57199	0.0442779	0.0600288	5.19305	0.15548	4.95953	0.0531334	3.20743	7.67716	3.47363	5.00578	0.0442779	6.7698	0.114149	7.14097	5.70876	0.0738057	4.67527	7.71376	0.0354223	4.87687	2.15457	4.15268	2.12997	7.16458	3.64288	2.60053	0.0324751	0.0334621	0.0698714	0.0373964	8.01082	3.6644	0.0856085	1.67416	22.127	3.75297	13.4018	3.53661	0.031488	1.85162	0.125966
K00023	phbB; acetoacetyl-CoA reductase	351.025	471.146	323.73	323.965	280.367	290.628	328.844	533.692	383.852	228.683	438.164	742.614	379.181	379.606	435.046	455.869	496.089	436.043	340.473	316.571	252.129	281.268	356.611	297.559	265.738	361.635	473.534	370.188	305.855	422.737	698.838	343.184	362.366	373.764	420.312	384.697	468.12	298.982	231.156	311.726	524.331	382.228	309.45	335.544	262.849
K00024	mdh; malate dehydrogenase	13223.1	14110.6	8804.19	11439.5	8946.75	8002.75	10281.2	11239.3	13679.2	11100.1	12050.8	5314.99	13643.9	11356.5	11510.8	11837.5	8680.18	8459.9	10574.9	8244.78	9641.27	10590	11134.8	9290.08	11726.4	8806.46	7494.75	12007.9	9818.7	10843.9	7707.74	12756	7373.99	8231.82	8116.49	6488.06	9992.55	10339.1	6207.75	8787.44	8032.88	10353.8	11889.8	10252.5	13590.8
K00025	MDH1; malate dehydrogenase	2.7276e-08	1.06624e-08	2.46278e-09	2.95331e-08	9.22819e-09	1.25109e-08	2.68646e-08	3.24044e-08	2.00992e-08	1.10738e-08	7.7114e-08	7.99853e-08	6.35977e-09	2.97388e-08	9.22819e-09	1.76364e-08	2.37905e-08	1.06624e-08	7.58826e-09	1.53822e-08	3.28274e-09	3.28274e-09	7.38255e-09	2.87131e-09	2.68675e-08	2.11249e-08	2.17391e-08	1.55851e-08	4.16326e-08	3.54814e-08	6.7683e-09	6.97402e-09	1.45623e-08	7.79398e-09	2.27677e-08	3.69127e-09	1.78421e-08	1.10738e-08	9.02537e-09	2.21505e-08	1.33309e-07	1.94849e-08	6.56259e-09	6.15406e-09	2.62532e-08
K00026	MDH2; malate dehydrogenase	0.000184387	7.20784e-05	1.66485e-05	0.000199645	6.23831e-05	8.45746e-05	0.000181606	0.000219056	0.000135872	7.48597e-05	0.000521295	0.000540705	4.29924e-05	0.000201036	6.23831e-05	0.000119223	0.000160825	7.20784e-05	5.12971e-05	0.000103985	2.21915e-05	2.21915e-05	4.99065e-05	1.94102e-05	0.000181626	0.000142805	0.000146958	0.000105356	0.000281439	0.000239857	4.57541e-05	4.71448e-05	9.84418e-05	5.26877e-05	0.000153911	2.49532e-05	0.000120614	7.48597e-05	6.1012e-05	0.000149739	0.000901176	0.000131719	4.43635e-05	4.16018e-05	0.000177473
K00027	ME2; malate dehydrogenase (oxaloacetate-decarboxylating)	9866.83	11726.8	10362.7	9693.13	9697.9	9390.19	9022.04	11692.8	14969.4	8863	11958.7	17227.4	10923.7	10232.5	11722.5	12959.4	17803.2	10525.9	10423	10151.5	12063	10523.8	11485.7	9627.72	8981.55	11702	14070.9	11471.7	14774.3	13066.1	15826.1	10645.8	12913.3	9636.85	11631.5	11324.1	11872.7	10074.8	8189.23	11725.6	11449.1	8911.85	10446.2	10694.1	10280.7
K00028	E1.1.1.39; malate dehydrogenase (decarboxylating)	0.689616	0.0413952	0.0165608	0.000571274	0.000181324	0.00024548	0.000522995	0.000628413	0.00039211	0.935262	0.00149278	0.0015676	0.000128921	0.541787	0.000185104	0.000346828	0.00047601	1.0957	0.000150112	0.000304125	7.42414e-05	0.213242	0.000148231	5.83632e-05	0.305304	0.534302	0.000431256	0.000305126	0.0420046	1.76045	0.295396	0.000137803	0.000288586	0.000153762	0.000447105	7.93395e-05	0.000354509	0.000217097	0.000180657	0.247529	5.5176	1.61482	0.0001298	0.000125722	0.000511176
K00029	E1.1.1.40; malate dehydrogenase (oxaloacetate-decarboxylating)(NADP+)	10096.2	10903.3	6695.84	8943.46	7139.38	6458.52	8451.84	8845.31	10950	8534.09	9316.81	3988.49	10172.6	8992.92	9177.08	9390.02	5843.62	7712.65	8730.35	6209.44	7692.02	8095.21	8582.19	7784.75	8624.18	7226.73	6137.43	9376.77	7579.66	9295.9	5883.04	9905.46	5463.99	7313.37	6509.74	5147.19	7646.72	8392.42	5005.56	6976.83	7221.01	8055.12	9526.19	8044.6	10162.1
K00030	IDH3; isocitrate dehydrogenase (NAD+)	1713.59	1523.33	1420.38	1511	1501.18	1475.66	1390.95	2030.71	2166.56	1374.6	1851.49	3003.02	1692.18	1400.22	1488.25	1862.57	3192.24	1662.8	1829.09	1598.56	1975.45	1641.7	1594.58	1565.05	1704.46	2027.07	2376.17	1905.84	2721.99	1825.83	2687	2051.43	2023.47	1417.57	2129.79	1386.73	2021.15	1462.86	1393.28	1993.71	2684.6	1488.1	1513.45	1726.6	1706.31
K00031	IDH1; isocitrate dehydrogenase	13377.7	14947.3	11191.9	12622.9	11555.4	10404	11302.8	13306.5	17028.6	11754.8	13702.7	12928.5	14536.6	12677.6	13684.2	14806.1	14821.5	11273.9	12258.8	10702.3	12989.8	12552.8	12737.2	12690.6	11740.6	12083.7	12757.4	13831.4	14166.4	14405.2	13505	13905.5	11962.5	10850.9	12052.1	10270.2	12303.1	12195.3	8455.53	11733.6	11372.8	10986.7	13785.1	12214.6	13625.9
K00032	E1.1.1.43; phosphogluconate 2-dehydrogenase	3.09065e-05	1.20816e-05	2.79058e-06	3.3464e-05	1.04565e-05	1.41762e-05	3.04403e-05	3.67175e-05	2.27744e-05	1.25478e-05	8.7378e-05	9.06315e-05	7.20627e-06	3.36971e-05	1.04565e-05	1.99838e-05	2.6957e-05	1.20816e-05	8.59827e-06	1.74296e-05	3.71968e-06	3.71968e-06	8.36518e-06	3.25349e-06	3.04436e-05	2.39366e-05	2.46326e-05	1.76595e-05	4.7174e-05	4.02041e-05	7.66918e-06	7.90227e-06	1.65005e-05	8.83137e-06	2.57981e-05	4.18259e-06	2.02169e-05	1.25478e-05	1.02267e-05	2.50988e-05	0.000151053	2.20784e-05	7.43608e-06	6.97317e-06	2.97476e-05
K00033	PGD; 6-phosphogluconate dehydrogenase	7054.56	7382.34	4966.43	5933.58	4925.39	5506.19	5153.93	6700.16	9074.62	5676.71	6713.76	6612.05	7590.14	6618	6511.08	6884.79	9089.44	4288.19	5221.06	5917.71	6819.37	6004.5	6968.19	4054.25	6463.26	5161.74	6284.64	6231.33	8380.16	6041.65	7144.86	6913.94	6389.02	5966.34	5313.85	5597.92	6282.36	5681.3	4419.24	6712.37	5166.42	5514.94	5872.12	6595.42	8065.13
K00034	gdh; glucose 1-dehydrogenase	1728.02	2278.32	1658.1	1864.71	1512.29	1409.73	1530.67	2009.46	2283.91	1655.25	2190.56	3443.47	1995.29	1787.14	1767.49	2271.44	3347.23	1805.6	1823.31	1676.47	2001.01	2009.89	1731.41	1341.24	1627.23	2276.57	2448.27	2054.95	2449.44	2310.49	2528.59	1746.5	2459.93	1541.94	2038.13	2102.24	2319.36	1510.37	1566.74	2193.24	2491.85	1573.45	1923.3	1957.19	1544.23
K00035	gal; D-galactose 1-dehydrogenase	1.98035	0.0846883	5.60475	0.00256585	1.98576	2.38631	0.00233401	0.362683	9.47001	4.28801	2.39192	0.00694917	4.73877	1.10338	9.14143	1.98649	0.434117	2.2291	0.000659273	0.50557	2.81756	12.8002	5.17134	7.56434	4.60034	1.08773	0.00188871	0.00135404	2.90465	3.58234	5.37155	4.69843	3.18701	0.000677145	3.57981	0.0003207	1.19416	2.78644	1.59365	4.88285	19.9774	14.5215	0.000570161	0.000534668	0.0022809
K00036	G6PD; glucose-6-phosphate 1-dehydrogenase	6161.33	5982.71	3799.42	5010.77	3682.88	4174.18	4160.86	5266.5	6832.6	4756.79	5540.76	4509.72	6634.69	5304.11	5022.3	5426.52	6739.57	3027.64	4090.06	4486.56	4954.75	4825.14	5587.44	3252.94	5519.69	3963.57	4513.45	5224.58	6594.8	4862.34	4758.06	5734.9	4562.93	4633.7	4109.02	3929.53	4911.02	4629.42	3428.83	5140.65	4153.47	4514.6	4765.25	5011.73	6892.79
K00038	E1.1.1.53; 3alpha(or 20beta)-hydroxysteroid dehydrogenase	87.4951	56.9101	52.6017	82.6009	38.5789	59.6029	66.3106	59.2374	103.911	66.641	75.5434	130.813	92.3381	89.6168	81.6419	58.1292	56.2906	72.2634	48.6312	57.9379	49.088	81.7115	84.6261	54.8524	80.855	49.7113	55.1004	55.8766	82.9583	73.9692	59.1835	54.4963	42.8318	48.9128	78.77	45.068	56.4226	62.6756	40.1103	85.2486	155.842	60.1508	65.7415	80.6342	81.578
K00039	rbtD; ribitol 2-dehydrogenase	2.34164	0.184415	0.0580088	0.259485	0.308135	0.109924	0.236039	0.64919	0.90555	2.16055	0.677544	0.705794	0.555828	1.45368	0.0810812	1.19123	0.69177	2.50727	0.0676799	0.785435	0.466427	0.941635	0.068349	0.138287	1.16148	1.36187	0.191006	0.317564	0.89789	4.35579	0.716225	0.790228	0.127948	0.0684799	0.206802	0.0324325	0.156766	0.10015	0.0825747	0.739013	13.7845	3.7427	0.059878	0.0540711	0.230668
K00040	uxuB; fructuronate reductase	3200.15	2884.14	2880.61	3037.91	2578.32	2746.79	2654.71	3258.72	4260.37	2721.69	3224.87	5205.05	3202.95	2818.02	3055.1	3399.13	5061.01	2956.22	2996.77	2705.2	3229.21	3104.13	3366.78	2478.35	2755.68	3604.84	3810.27	3535.65	4193.76	3855.81	3934.35	2719.72	3811.12	2597.67	3393.68	2802.03	3276.77	2644.41	2214.81	3248.43	3388.25	2479.97	2666.67	2916.17	2812.89
K00041	uxaB; tagaturonate reductase	8104.14	9259.28	6328.94	7828.91	6006.86	5079.93	6431.92	7320.4	8798.11	6999.06	7780.96	6897.06	8865.6	7135.46	7533.2	7857.95	8586.82	5340.2	6479.65	5917.43	6630.1	6862.98	7649.24	5637.59	7455.55	6242.72	6503.26	7966.95	7321.04	7441.45	7018.7	7589.22	6472.72	5141.56	6451.39	5245.99	7258.1	6095.3	4289.33	6470.17	5476.98	6052.85	7024.63	7120.27	8356.26
K00042	garR; 2-hydroxy-3-oxopropionate reductase	5882.19	6067.79	5915.45	6107.61	5844.87	5097.61	5227.37	7250.94	8856.38	5179.08	7423.69	8200.14	7531.7	5490.49	6614.57	7372.22	9428.69	5803.27	6072.82	5840.88	7179.74	6123.02	6546.29	6673.12	5124.55	6425.48	7664.16	6784.62	8096.66	7295.53	8907.01	7041.93	6960.63	5783.08	7257.73	6132.89	6742.53	6045.72	4740.24	7351.83	5898.01	5227.62	6532.28	5993.44	6253.85
K00043	gbd; 4-hydroxybutyrate dehydrogenase	0.0681795	5.71472e-06	1.31998e-06	1.58289e-05	4.94603e-06	6.70548e-06	1.43986e-05	0.042574	0.0851241	5.93524e-06	4.13308e-05	4.28697e-05	0.0425601	1.59391e-05	4.94603e-06	9.45259e-06	0.0511055	5.71472e-06	4.06708e-06	0.059637	0.0510945	0.0510945	3.95683e-06	1.53894e-06	1.44002e-05	1.13223e-05	1.16515e-05	8.35313e-06	0.051115	1.9017e-05	3.62761e-06	0.085117	7.80495e-06	4.17734e-06	1.22028e-05	1.97841e-06	9.56285e-06	5.93524e-06	4.83733e-06	1.1872e-05	7.14496e-05	1.04433e-05	3.51735e-06	3.29839e-06	1.4071e-05
K00045	E1.1.1.67; mannitol 2-dehydrogenase	96.4048	108.868	108.298	104.369	101.308	97.0759	136.892	131.591	176.005	115.854	140.586	69.833	142.134	175.337	170.197	117.284	45.2526	115.973	118.46	66.2273	104.437	138.106	147.949	124.119	164.475	128.224	102.274	130.04	138.346	154.269	88.1415	118.608	96.9799	122.857	63.2196	49.4855	89.8481	118.524	77.2594	118.41	76.4896	129.823	86.4175	95.4464	137.041
K00046	Unclassified	13456.1	14995	11564.3	13328.2	11377.8	10208.9	11938.9	13717.5	16868.5	12211.1	14507.3	17242.5	13954.2	12628.4	13949.1	15189.1	19086.5	11342.4	12140.3	11207.1	13531.4	12218.4	13315	11226.2	11719.2	12757.2	13946.1	14488.4	15439.9	13649.8	15524.6	12449.8	13939.5	10746.1	12106.5	11475.7	13205.9	10881.7	8593.84	13219.4	11419.5	10679.3	13077.2	12698.3	13414.9
K00048	fucO; lactaldehyde reductase	8890.19	9201.27	6752.38	8177.5	7595.86	6105.84	7708.68	9063.98	11231.6	7859.53	8467.52	6216.21	9582.24	7398.46	8610.1	9059.37	8758.97	6478.11	7996.54	6490.74	8263.53	7072.36	8213.88	8406.55	7689.22	7171.98	6613.33	8843.64	8047.14	7549.26	7335.04	9512.35	6362.38	7166.15	6887.75	5740.88	6715.33	7822.79	4722.23	7059.22	5029.88	6661.4	8320.61	7533.53	9616.81
K00049	GRHPR; glyoxylate/hydroxypyruvate reductase	0.279368	0.205379	0.0748907	0.308583	0.10071	0.139225	0.822353	1.47029	0.204215	0.152111	1.01509	2.24466	0.18931	0.318749	0.131718	0.700558	1.16969	0.500816	0.112042	0.20734	0.0917854	0.342704	0.103197	0.0614746	0.310576	0.23028	1.50196	0.407831	0.503742	0.404568	0.54683	0.0802396	1.42524	0.0883838	0.279262	0.0911832	0.220766	0.118239	0.133111	0.336759	2.4075	0.226889	0.093074	0.103335	0.265813
K00050	Unclassified	2587.17	3906.95	3273.19	3052.14	3335.84	2621.21	3370.21	3549.64	4512.86	2862.06	3612.27	5033.29	3446.06	3053.78	3716.62	4290.63	5541.09	3325.96	3519.99	2956.18	4069.51	3052.27	3776.99	3075.08	2520.06	3663.68	3978.08	3613.19	4082.64	3382.16	4364.97	3052.73	3747.52	2983.1	3163.64	3662.18	3661.89	2751.23	2450.76	3798.76	3157.8	2892.51	3244.36	3149.03	2968.77
K00051	E1.1.1.82; malate dehydrogenase (NADP+)	1.49063	0.884322	1.25512	1.38311	6.43891	3.7309	3.35884	1.05875	3.98395	4.08911	2.20998	4.68962	2.70146	0.963728	1.20742	1.37135	5.41228	1.63706	2.08082	2.31315	0.954764	3.10705	1.07741	4.90129	8.57429	5.5164	2.38846	2.42948	8.28589	7.02758	3.63806	7.825	1.68054	2.04141	2.88312	1.0205	9.60503	7.38313	1.02578	5.1706	4.34231	1.3843	3.82153	5.24972	1.48961
K00052	leuB; 3-isopropylmalate dehydrogenase	17354.5	19869.3	15485	16332.4	15070	13794.9	14926.2	18473	22461.8	15100.2	18201.9	18780.9	18307.6	16544.6	18265.2	19669.4	20655.5	15802.8	17045.4	14223	17552.9	16614.3	17009.6	15904.1	15279	16499.7	17693.7	18222.7	18494.1	19198.4	19479.7	18589.7	16485.8	14639.5	16446.9	13878.6	17248.4	16024.1	11561.6	16065.4	16082.5	14781.7	18220.5	16646.5	17541.1
K00053	ilvC; ketol-acid reductoisomerase	15302.2	17866.4	13152.2	14535.7	13048.5	12386.8	13195	16332.3	19233.4	13317.1	15861.5	15662.7	16251.5	14603.1	16021.9	16991.9	17471.9	13769.9	14849.4	12269.7	14860.9	14255.8	15015.4	14089	13602.3	13954.7	15081.6	15894.3	15846.6	16970.5	16578.3	16876.8	13908.1	12625.7	14276.9	11608	14559.3	14195.5	9818.19	13605.7	14293	12825.2	15975	14466.9	15690.4
K00054	mvaA; hydroxymethylglutaryl-CoA reductase	2294.49	1502.39	1252.01	847.559	1216.79	1907.37	892.331	1134.75	2798.98	1135.47	1255.06	2033.75	1154.66	1612.98	1660.41	1396.9	2573.64	805.936	1277.35	1652.88	2003.57	1709.19	1541.04	607.185	1342.89	1935.86	1976.24	1338.73	3320.02	1572.87	1391.98	1338.12	1696.33	2568.58	1211.26	1646.99	1588.79	1594.91	1446.37	2392.5	1539.06	1392.78	1544.32	1768.27	1760.07
K00055	E1.1.1.90; aryl-alcohol dehydrogenase	1140.55	1246.03	976.208	1127.7	1186.26	1911.84	966.596	1538.78	2337.91	1237.34	1530.34	2734.61	1200.51	1332.53	1390.91	1569.02	2384.09	1017.43	1130.24	1524.43	1890.9	1402.05	1255.62	1033.12	1160.65	1230.5	1941.62	1296.19	2726.26	1178.25	2080.02	997.807	2175.39	2087.48	1216.31	1651.77	1408.01	1135.3	1370.85	1939.33	1410.7	975.388	1212.45	1584.02	1298.95
K00057	gpsA; glycerol-3-phosphate dehydrogenase (NAD(P)+)	19479	20049.1	15645	17185.2	15607.9	15367.9	15624.5	19172.9	24689.1	16086.3	19182.4	19321	19416.9	17375	19257	20348.8	21980.5	15341.2	17775.8	15390.3	18543.7	17440.6	18347	16208.2	16502.5	17538.5	18840.3	19289.5	21326.9	19729	19694.4	19775	17171.5	16798	17349.9	14453	17727.3	17389.6	12797.7	18010.1	16503.9	15539	19095.5	17859.7	18911.3
K00058	serA; D-3-phosphoglycerate dehydrogenase / 2-oxoglutarate reductase	32584	36848.1	29694.6	29279.8	28589.7	26407.8	27856.5	34389	41088	27114.6	35320.4	46128.8	32537.2	32751	35420.5	37573.3	44617.3	31832.8	31562.3	28076.1	33496.5	32463.9	32737.6	28362.7	28098.6	33884.3	38466.9	34799	38525.8	36339.6	43824.3	32000.8	34530.6	28777.7	32251.7	29235.1	33516.2	29024.2	23140.2	32508.6	32059.7	27866.3	33719.4	31657.9	30751.8
K00059	fabG; 3-oxoacyl-	47564.3	50488.2	42223.8	45184.3	40431.6	37993.9	39994.6	50505.8	63046.9	41539.1	52225	62437.5	50212.2	45646.9	49987.5	53947.8	64215.8	41960.5	44721.1	41691.7	49391.1	47264.8	47631.8	41237.7	41702	47707.9	54262.1	50157.1	58382.8	52340.3	59386.8	46268.8	51575.6	41640.8	47531.3	42213.2	50404.6	42268.8	33979.6	49854.7	46858.3	40683.3	48164.5	46771.2	46870.7
K00060	tdh; threonine 3-dehydrogenase	1740.02	1898.8	1815.49	1561.15	1520.69	1375.79	1290.39	2169.11	2356.8	1693.01	2132.75	2790.24	1721.28	2030.52	1870.38	2039.62	2867.87	2414.87	1639.75	1443.55	2142.13	1841.29	1899.65	1480.59	1861.84	1959.71	2320.77	1793.02	2386.84	3361.28	2806.98	1625.08	2595.54	1420.35	2029.12	1746.57	2039.33	1443.85	1608.04	1820.96	3106.71	1626.92	1611.82	1678.93	1534.9
K00061	RDH5; 11-cis-retinol dehydrogenase	2.68982e-06	1.05147e-06	2.42867e-07	2.9124e-06	9.10035e-07	1.23376e-06	2.64925e-06	3.19555e-06	1.98208e-06	1.09204e-06	7.60458e-06	7.88773e-06	6.27167e-07	2.93268e-06	9.10035e-07	1.73921e-06	2.34609e-06	1.05147e-06	7.48315e-07	1.51692e-06	3.23727e-07	3.23727e-07	7.28028e-07	2.83154e-07	2.64953e-06	2.08322e-06	2.1438e-06	1.53692e-06	4.10559e-06	3.49899e-06	6.67454e-07	6.87741e-07	1.43606e-06	7.68601e-07	2.24523e-06	3.64014e-07	1.7595e-06	1.09204e-06	8.90034e-07	2.18437e-06	1.31462e-05	1.9215e-06	6.47168e-07	6.06881e-07	2.58896e-06
K00062	ARA2; D-arabinose 1-dehydrogenase	4.02797e-09	1.57456e-09	3.63689e-10	4.36128e-09	4.89886e-07	1.84754e-09	3.96721e-09	4.7853e-09	2.96813e-09	1.22367e-06	1.13878e-08	1.17749e-06	9.39175e-10	4.39166e-09	1.36277e-09	1.10287e-06	3.51324e-09	1.57456e-09	3.89681e-07	1.59106e-06	4.84777e-10	2.13757e-06	1.34489e-06	4.24019e-10	2.08128e-06	3.1196e-09	3.21031e-09	2.30151e-09	1.46381e-06	3.37338e-06	2.41616e-06	1.02988e-09	2.15047e-09	1.15097e-09	2.61054e-06	5.45106e-10	2.63482e-09	1.1019e-06	1.26471e-06	3.27107e-09	1.28846e-05	5.62307e-06	8.56247e-07	9.08796e-10	3.87693e-09
K00064	E1.1.1.122; D-threo-aldose 1-dehydrogenase	123.078	132.895	78.5722	107.009	78.7447	65.8095	97.6771	91.9573	111.919	98.7249	154.322	205.962	146.466	146.517	101.907	103.016	140.113	112.892	70.2376	82.7111	98.4337	194.145	99.8886	64.0418	105.462	202.507	131.655	97.536	176.314	158.527	104.057	66.5016	124.687	56.8952	136.814	75.7072	124.072	90.7215	110.446	151.633	318.171	107.753	117.531	128.543	104.464
K00065	kduD; 2-dehydro-3-deoxy-D-gluconate 5-dehydrogenase	3894.9	4358.75	4139.45	4029.71	3935.93	3520.79	3654.46	5020.86	5549.19	4008.41	5116.3	8779.04	4330.16	4211.72	4498.21	5151.02	8698.18	4078.04	3941.4	4005.1	5126.95	4577.06	4718.17	3755.15	3839.6	5178.7	6271.96	4785.3	6354.66	4689.21	7492.21	3830.38	6361.1	3707.08	4671.8	4737.22	4813.71	3651.3	3598.6	5150.4	4920.71	3427.12	4150.41	4522.29	3853.68
K00066	algD; GDP-mannose 6-dehydrogenase	177.933	216.507	93.0538	221.847	89.5275	103.475	137.574	261.958	121.755	77.141	134.537	113.381	115.761	69.5411	136.694	146.543	88.0796	84.9146	133.221	90.4266	84.3561	81.2755	91.8921	60.9873	113.378	114.021	93.6744	108.921	46.1677	114.099	108.022	188.813	60.0193	162.576	218.682	77.257	196.01	193.28	68.4087	70.2137	203.948	102.606	105.147	170.944	104.01
K00067	rfbD; dTDP-4-dehydrorhamnose reductase	18811.4	19960.8	15745.5	17434.6	16593.9	14201.6	17216.5	19142.3	25207.1	16810.1	20046.9	18146	20415.9	17616.3	19835.9	19939.1	19709	15864.4	18378	15135.5	18181.9	17751.8	18897.1	16702.1	16983.6	17209	17715.5	19376.2	19263.6	18387.2	18690.8	18122.6	15858.9	17420.5	16714.5	14362.4	17051.4	17211.7	12408.1	17926.5	15058.2	15758	18847.6	17844	19115.4
K00068	srlD; sorbitol-6-phosphate 2-dehydrogenase	713.662	807.551	689.795	490.469	753.751	653.9	624.533	993.47	917.016	710.323	844.089	1348.57	798.001	829.03	708.57	923.788	1305.5	675.516	856.29	749.005	914.756	1079.57	651.169	715.581	709.96	1192.78	1064.69	1073.85	1526.59	1145.11	939.043	1039.83	1006.51	585.13	1181.43	622.401	959.361	1005.27	802.379	825.038	1460.76	736.907	671.429	932.782	903.203
K00069	HPGD; 15-hydroxyprostaglandin dehydrogenase (NAD)	1.49479	1.29915	0.574308	2.6207	0.869284	1.00112	2.01174	2.04927	1.31929	0.844832	4.31406	10.8956	0.681038	1.64778	0.965226	1.37339	2.34077	1.19241	0.839308	0.995838	0.499109	0.677143	0.790917	0.625913	1.63679	3.2096	1.86084	1.13238	2.2388	6.02566	1.10778	0.641743	1.17103	0.883093	1.34661	1.09816	1.08223	1.46922	0.668607	1.54031	9.77527	3.16563	1.10095	2.02273	1.82802
K00073	allD; ureidoglycolate dehydrogenase (NAD+)	223.13	216.381	248.611	229.851	211.943	193.224	202.888	270.413	333.533	193.662	295.607	536.026	323.299	220.299	284.996	329.728	440.244	269.478	231.562	262.047	238.777	343.646	220.204	152.918	210.014	288.671	388.456	242.179	350.654	285.631	303.682	265.172	323.548	236.117	324.848	250.053	359.903	262.294	229.461	316.62	316.256	214.225	222.664	283.543	174.108
K00074	paaH; 3-hydroxybutyryl-CoA dehydrogenase	12315.8	14938.9	13442.8	11982.1	11264.2	12359.9	10307.6	14210.6	16895.3	11749.4	14235.9	26480.4	12206.6	13723.1	13484.5	16741.4	22920.8	14817.8	12010.5	12947.3	15684.3	14058.3	14017.4	10285.3	11901.8	16649.9	19690.2	15480.4	19191.8	17915.4	21570.2	11627.1	19355.8	11666.2	14929	14673.4	17316.4	10374.8	11175.6	15416.3	16340.2	11151.4	13274.2	14395.7	10777.3
K00075	murB; UDP-N-acetylmuramate dehydrogenase	22011.9	23178.7	17488.5	19500.2	17441.6	16558.2	17719.5	21304.7	27199.8	18310.6	21692.6	21092.7	22342.9	19646.3	21408.9	23025.6	25093.4	16417.1	19261.9	17150.1	20638.4	19310.8	20692.8	17612.6	18810.2	18831.8	20330.9	21195.1	23292.9	20279.1	21689.5	21926.7	18868	17485.1	19080.5	15986.3	19946.7	19113.3	13408.8	19488.4	16860	17474	21029.6	20017	21842
K00076	hdhA; 7-alpha-hydroxysteroid dehydrogenase	2507.24	2459.51	2396.24	2749.18	2431.91	2237.28	2035.42	2979.57	4064.49	2323.71	3255.19	2301.61	3564.85	2120.27	2963.42	3155.4	3206.02	1984.96	2577.38	2382.84	2623.07	2554.83	3049.56	3398.87	2214.82	2073.52	2772.13	2700.79	2212.81	2713.99	2985.64	3274.88	2320.26	2375.26	2995.01	2154.27	2360.43	2901.75	1757.23	2678.34	1533.23	2066.09	2959.38	2307.73	2586.85
K00077	panE; 2-dehydropantoate 2-reductase	18456.3	20161.3	16113.6	17743.7	16451.3	15230.4	16009.2	20786.3	25699.4	17138.1	20229.7	23778.4	18213	18595.6	19557.9	21884.8	24341.7	17070.5	17619.5	16217.3	20040.7	17822.8	18614.4	16205.2	16821.4	18148.6	20592.9	19890.6	22983.9	20182.3	23196.9	17508.5	21219.8	17523.6	17159.4	15702.9	18764.2	16341.1	12752.9	18888.1	18794	15784	18403.9	19142.2	18690
K00078	DHDH; dihydrodiol dehydrogenase / D-xylose 1-dehydrogenase (NADP)	10.6366	6.96333	34.3604	24.9216	11.9582	11.9197	6.13082	7.51055	22.5928	6.69378	20.8925	39.1378	67.18	24.1609	22.5268	15.7698	48.8261	16.5604	16.446	33.1322	17.0972	94.6163	23.4298	5.77627	33.9848	34.5561	49.9957	34.9331	22.0815	27.4912	30.7204	65.8205	14.4473	20.8416	51.6679	27.9521	28.5887	69.8137	44.3303	53.7765	18.6529	22.9501	24.3065	17.743	11.2592
K00079	CBR1; carbonyl reductase 1	0.000748658	0.000292656	6.75971e-05	0.000810609	0.00025329	0.000343393	0.000737366	0.000889419	0.000551672	0.000303949	0.00211659	0.0021954	0.00017456	0.000816255	0.00025329	0.000484075	0.000652988	0.000292656	0.000208279	0.000422204	9.0103e-05	9.0103e-05	0.000202632	7.88103e-05	0.000737445	0.000579824	0.000596684	0.000427771	0.00114271	0.000973876	0.000185773	0.000191419	0.000399698	0.000213925	0.000624916	0.000101316	0.000489721	0.000303949	0.000247724	0.000607977	0.00365899	0.000534813	0.000180127	0.000168913	0.000720586
K00081	CBR2; carbonyl reductase 2	5.22923e-06	2.04414e-06	4.72152e-07	5.66194e-06	1.76918e-06	2.39853e-06	5.15035e-06	6.21241e-06	3.85332e-06	2.12302e-06	1.47839e-05	1.53344e-05	1.21926e-06	5.70138e-06	1.76918e-06	3.38117e-06	4.56099e-06	2.04414e-06	1.45478e-06	2.94901e-06	6.29351e-07	6.29351e-07	1.41535e-06	5.50474e-07	5.1509e-06	4.04996e-06	4.16772e-06	2.98789e-06	7.9816e-06	6.80233e-06	1.29759e-06	1.33702e-06	2.79181e-06	1.49422e-06	4.36491e-06	7.07673e-07	3.42061e-06	2.12302e-06	1.7303e-06	4.24659e-06	2.55573e-05	3.73556e-06	1.25815e-06	1.17983e-06	5.03314e-06
K00082	ribD2; 5-amino-6-(5-phosphoribosylamino)uracil reductase	92.5103	88.6252	63.4908	57.6756	88.8264	56.5375	95.4962	127.876	121.417	81.4866	133.965	100.055	76.0387	87.6507	61.7109	89.829	97.4377	158.203	79.6753	52.4791	106.273	81.0789	88.1194	86.7677	89.8539	70.7958	56.6308	96.2882	67.6918	135.164	74.0279	104.907	58.6435	136.53	78.1918	71.2623	102.978	91.0147	48.1547	122.958	185.511	104.029	87.6498	49.2352	95.5109
K00083	CAD; cinnamyl-alcohol dehydrogenase	0.0822001	0.0660229	0.030277	0.00208445	0.070892	0.0360502	0.0270289	0.0173856	0.0466202	0.0459832	0.0406099	0.075886	0.0255817	0.00209896	0.0458529	0.0966182	0.317809	0.0408901	0.000535579	0.0262185	0.0203004	0.000231696	0.0356883	0.000202657	0.0119307	0.0266238	0.127011	0.00109999	0.0581744	0.00250428	0.0256105	0.000492226	0.0562638	0.050722	0.0517788	0.0855996	0.121672	0.00078159	0.0407745	0.00156338	0.00940894	0.00137525	0.000463187	0.0757391	0.0520248
K00086	dhaT; 1,3-propanediol dehydrogenase	1348	1454.49	1288.94	1483.38	1308.94	1859.45	1103.94	1914.97	2561.5	1479.32	1864.62	3277.52	1298.34	1391.92	1609.93	1853.65	3381.89	1301.21	1195.3	1732.45	2081.67	1528.9	1529.7	1195.58	1279.41	1483.26	2403.2	1634.64	2417.81	1326.29	2789.53	1103.6	2788.11	1664.42	1497.77	2042.11	1816.27	1119.4	1401.41	2199.9	1665.89	1237.63	1538.06	1839.6	1374.65
K00087	ygeS; xanthine dehydrogenase molybdenum-binding subunit	2763.02	3335.47	2918.43	2819.31	2431.24	2621.72	2461.62	3316.37	3302.86	2474.81	3410.59	5827.61	3177.78	3019.21	3098.58	3640.42	5192.55	3813.06	2964.27	2719.09	2978.99	3481.59	2959.71	2294.61	2860.73	4006.57	4521.24	3391.47	4169.27	4274.86	4624.82	2807.63	3959.97	2615.44	3345.1	3425.52	3983.12	2808.94	2568.5	3538.63	3844.21	2736.8	2880.2	3006.24	2433.93
K00088	IMPDH; IMP dehydrogenase	19791.2	21720.3	16615.8	17897.1	16811.6	16049	16908.9	20420.9	25672.2	16858.1	20400.8	21044.5	20295.6	18546.5	20220.5	21845.1	23551.4	16867.6	18728.4	16208.2	19821.1	18467.4	19632.4	16965.8	17338.5	18442	20041.6	19889.7	22696.1	20656.6	21334.6	20624.6	18349.4	17700.2	18179.9	15460.6	18890.2	18400.7	13435.7	18962.2	17907.8	16347.5	19805.3	18922.5	19653.1
K00090	ghrB; glyoxylate/hydroxypyruvate/2-ketogluconate reductase	78.4804	91.6142	257.841	65.1091	134.581	78.3986	68.4412	109.288	127.426	72.7245	86.4383	229.125	108.474	259.011	91.0583	130.002	196.564	152.134	100.163	57.3233	301.946	131.124	99.9317	90.695	78.7704	175.292	266.223	125.193	173.246	267.603	404.091	94.4464	257.842	88.5631	258.214	82.3877	191.36	113.704	129.045	125.067	146.432	96.0731	124.527	192.895	95.0076
K00091	Unclassified	2411.13	1995.8	2340.55	2155.89	1866.43	1766.62	1754.8	2388.43	3279.69	2236.93	2366.78	3486.59	1957.82	2329.15	2473.16	2329.73	3173.52	1942.18	1814.97	2052.73	2323.5	2810.74	2088.92	1790.67	2263.1	2553.48	2620.98	2340.7	3037.45	2289.82	3365.63	1491.89	3177.44	2092.57	2420.4	1872.56	2858.8	1838.83	1653.42	2368.98	2385.33	2169.9	2535.97	2497.91	2226.89
K00093	mdh; methanol dehydrogenase	0.13859	0.12341	0.0761216	0.0862568	0.0642025	0.0824625	0.1226	0.115757	0.10259	0.0963431	0.240008	0.503293	0.0965658	0.121815	0.11416	0.126555	0.278568	0.0671038	0.0661557	0.131877	0.151564	0.0448946	0.0932886	0.0456839	0.109499	0.146167	0.205513	0.0938433	0.350036	0.135459	0.207422	0.0587059	0.133728	0.0624063	0.15502	0.115691	0.176088	0.070546	0.106654	0.186358	0.435814	0.084516	0.0569165	0.106282	0.120899
K00094	E1.1.1.251; galactitol-1-phosphate 5-dehydrogenase	31.3213	47.53	46.97	10.4701	96.9167	198.582	17.4922	357.134	63.1185	101.216	40.9099	29.1535	44.1422	10.7952	8.28255	10.0589	77.2236	5.50672	174.09	14.1231	117.658	20.2021	45.6566	300.837	123.429	34.7705	17.7713	14.6673	34.5368	21.2831	11.333	495.626	14.7147	24.1744	81.3077	11.302	30.9842	147.403	8.35018	38.4818	16.9275	8.82732	14.4188	42.6613	74.2675
K00096	araM; glycerol-1-phosphate dehydrogenase	1602.75	2072.13	1819.99	1468.77	1584.63	1373.74	1405.45	2120.76	1964.58	1456.56	1640.75	2337.38	1677.76	1705.13	1543.21	1964.85	2397.32	1611.23	1440.25	1329.86	1851.9	2075.59	1713.85	985.831	1610.25	2218.79	1780.98	1922.86	2154.27	2224.78	2304.76	1434.12	2199.45	1292.64	1969.51	1083.52	1828.02	1746.43	1516.7	1597.02	2219.99	1577.91	1371.51	1631.3	1425.25
K00097	pdxA; 4-hydroxythreonine-4-phosphate dehydrogenase	13210.1	13060.6	9528.03	11187.4	9554.76	8875.34	10662.4	11637.7	14588	10980.6	12580.1	10209.2	12247.1	11682.1	12468.3	12312.8	11455.7	10227.3	11456	9012.22	10468.4	11021.9	11489.1	10002.4	10876.9	10753.9	10313.2	12429.9	12310.9	12439.9	10294.3	11351.1	9637.4	9787.28	9868.41	8045.55	10612.3	10478.9	7172.87	10294.4	10429.4	10547.1	12203.4	10800.3	12715.4
K00098	Unclassified	282.769	379.849	272.502	303.719	237.253	364.962	366.079	244.65	337.14	248.98	309.239	671.925	330.918	319.256	360.274	357.459	726.361	295.193	323.855	203.254	335.719	319.93	347.111	270.732	250.653	354.044	423.497	380.402	438.636	296.029	436.124	305.392	334.676	242.73	309.801	338.938	294.427	216.856	207.976	353.026	285.202	244.614	335.07	254.867	254.712
K00099	dxr; 1-deoxy-D-xylulose-5-phosphate reductoisomerase	17391.2	19623.5	15461.1	16696.6	14981.3	13816.1	15511.3	18566.8	22660.3	15409	18812.3	18965	18702.3	16628.4	18340.7	19754	21155.7	15590.6	16989.9	14133.7	17396.1	16605	17630.9	15722.9	15752.9	16466	17818.1	18247.5	19055.3	18954.3	19556.8	18454.4	16643	14250.5	16892.6	13593.3	17251.3	16087.1	11768.8	16197.1	16031.3	14721.5	17825.8	16698.7	17514
K00100	bdhAB; butanol dehydrogenase	22625.8	24580	18188.1	20227.3	18817	16673.9	18910.1	21405.2	28683.4	19526.8	22443.4	21613.5	23453.6	22085.7	23101.8	23051.8	24367	18586.9	21185.1	17180.5	21520.3	19709.2	21507.6	19455.7	19617.8	19499.6	20472.7	22752.2	26199.1	23354.4	21542.3	23015.8	18657.1	18517.1	18499.1	16014.2	18850.9	20302.9	13125.4	18549.8	17597.4	17797.1	21531.8	20336.4	24451.8
K00101	lldD; L-lactate dehydrogenase (cytochrome)	179.357	105.165	73.8622	163.2	74.0462	109.079	132.892	124.51	180.731	118.045	221.334	295.086	146.836	207.427	148.928	110.321	96.8124	136.461	90.0268	94.1981	69.7982	140.48	136.949	83.8974	145.779	164.211	142.289	93.9893	176.45	159.995	93.1383	90.2269	68.964	89.1359	214.052	71.5695	101.734	97.0214	60.2057	154.085	433.015	127.512	109.07	143.344	165.715
K00102	LDHD; D-lactate dehydrogenase (cytochrome)	149.767	237.408	128.083	198.343	93.406	234.92	212.865	141.522	202.553	123.812	153.349	249.465	216.374	199.547	292.349	170.663	172.057	245.224	125.697	143.037	171.699	291.164	155.856	165.372	192.888	226.254	158.935	177.134	211.827	244.35	183.297	187.669	73.2726	172.779	207.862	144.193	210.672	205.711	123.576	167.324	399.63	292.884	272.617	146.325	216.22
K00103	GULO; L-gulonolactone oxidase	50.6977	31.7228	31.4559	50.6092	20.8601	32.107	36.6987	24.7892	61.9899	41.2635	13.4223	37.6644	61.4122	53.2487	53.3553	22.8948	18.6488	47.2477	30.9255	27.5734	25.9207	57.7134	55.1345	35.6996	42.3164	17.9427	15.7554	29.7284	28.223	24.823	27.7891	28.9809	16.2097	33.722	43.6083	26.2772	26.2708	34.9197	17.0359	46.0821	43.8196	25.5425	45.3837	50.4338	50.8212
K00104	glcD; glycolate oxidase	4062.78	7762.79	5447.78	4048.94	4623.43	4869.85	5200.96	6690.69	7053.79	3878.26	4780.31	6621.51	3875.2	5239.72	6055.43	6401.28	6958.88	5959.2	5674.02	3760.07	6125.66	5151.78	5772.06	3475.89	3953.77	5517.97	5144.97	4307.65	5540.61	5868.52	7130.62	5372.11	5436.95	4386.81	3918.4	4149.32	4814.91	5165.23	3855.61	5018.84	6090.76	4865.81	4316	5061.68	4139.05
K00105	E1.1.3.21; alpha-glycerophosphate oxidase	137.792	355.966	76.1158	167.942	433.433	153.642	325.254	321.561	530.329	248.709	262.016	828.555	238.001	642.548	692.573	97.8196	655.774	78.8125	259.023	546.671	725.91	93.5248	270.989	170.803	121.891	210.996	410.815	122.032	2116.68	380.059	516.101	329.883	557.368	580.472	76.9729	698.867	194.6	180.999	227.883	560.442	69.0288	178.195	22.4451	278.686	878.936
K00106	XDH; xanthine dehydrogenase/oxidase	0.616064	3.90963	2.57896	0.0436762	1.6136	0.193028	0.089141	1.24798	0.285551	0.897532	1.37302	0.683656	2.82959	0.404967	0.147631	1.32896	0.222956	15.2182	0.0370482	0.195845	1.52784	14.2901	0.975735	0.159386	4.32603	2.05029	0.0893723	0.08351	0.620839	14.1267	0.593126	2.11621	0.158794	0.115411	0.304664	0.239436	0.577177	0.131536	1.25786	4.57912	20.6695	20.0481	5.8425	0.153046	0.222975
K00107	ALO; D-arabinono-1,4-lactone oxidase	0.022363	0.00818274	0.00189004	0.0226649	0.00725607	0.00960138	0.020617	0.0257614	0.0172109	0.00893373	0.0591804	0.0617991	0.00577371	0.0228227	0.00708208	0.0139268	0.0193298	0.00818274	0.00596193	0.013622	0.00359139	0.00435254	0.00614427	0.00220356	0.021359	0.0162121	0.0166835	0.0119606	0.0335418	0.0284295	0.00605446	0.00713808	0.0111757	0.00598141	0.0184014	0.00283283	0.0136928	0.00889036	0.00737639	0.0169992	0.106889	0.0169552	0.00534101	0.00472287	0.0201478
K00108	betA; choline dehydrogenase	110.041	63.1724	61.6238	90.4248	66.9009	72.1951	82.6373	104.571	115.274	61.6777	217.858	329.979	111.462	98.2735	67.4927	106.888	140.24	64.2527	57.8423	87.9645	61.5107	113.245	57.6942	36.3734	98.6089	99.843	151.472	62.5725	160.002	130.462	98.3251	133.151	76.7686	51.6256	140.757	58.6298	111.728	122.792	81.378	156.217	369.838	91.0984	30.8939	89.6841	91.145
K00109	L2HGDH; 2-hydroxyglutarate dehydrogenase	8.73991	3.41649	0.789135	9.46313	2.95696	4.00881	8.60807	10.3832	6.44027	3.54837	24.7092	25.6293	2.03783	9.52904	2.95694	5.65118	7.62305	3.41649	2.43148	4.92891	1.05187	1.05196	2.3656	0.920039	8.60909	6.76893	6.96574	4.99383	13.3402	11.3693	2.16883	2.23465	4.66611	2.49738	7.29543	1.18277	5.71705	3.54837	2.892	7.09758	42.716	6.30453	2.10285	1.97191	8.41218
K00111	glpA; glycerol-3-phosphate dehydrogenase	10707.9	12828.3	9319.01	9858.97	9061.93	7750.3	9366.94	11354.2	13336.3	9844.73	12013.4	14277.8	12577.7	10044	10904.9	12429.6	16235.4	9592.35	9346.1	9561.03	10856.3	10082.4	12072.5	8096.75	9876.83	10507.4	10793.5	11147	13314.9	11037.8	13159.5	10135.3	11151.6	7801.45	9876.87	9757.03	11330.3	8715.41	7073.43	10525.4	9114.19	9350	9456.78	9656.31	11645.9
K00112	glpB; glycerol-3-phosphate dehydrogenase subunit B	3386.37	3689.44	1711.34	2787.83	1670.35	1356.84	1858.25	2117.51	2465.1	2781.47	2944.13	736.345	3790.33	2421.44	2107.12	2843	3121.17	964.146	1266.91	2032.84	1893.41	2041.56	2963.04	1382.52	3047.67	1292.91	1095.57	2589.98	2060.65	1482.22	1795.31	2437.09	1729.22	482.247	1453.69	1484.54	2325.32	1518.39	987.764	1546.73	645.519	2371.1	2206.25	1930.81	3910.63
K00113	glpC; glycerol-3-phosphate dehydrogenase subunit C	2881.15	3192.51	1511.03	2386.44	1434.04	1227.92	1640.09	1836.14	2138.73	2383.32	2534.06	680.633	3243.26	2114.38	1850.91	2450.23	2627.77	894.396	1143.31	1738.41	1643.11	1788.02	2554.11	1208.61	2604.29	1179.33	982.551	2239.46	1808.82	1321.41	1566.22	2098.51	1497.2	479.605	1286.34	1276.79	2042.61	1342.6	917.983	1369.22	604.249	2063.38	1935.15	1671.68	3329.39
K00114	exaA; alcohol dehydrogenase (cytochrome c)	5.70277	1.51962	2.37552	2.57192	6.97286	2.19639	2.35422	4.96544	3.46156	4.12083	3.25917	21.365	5.59159	3.21224	2.8485	3.91834	8.70616	10.3095	2.02351	6.98961	4.1948	2.26903	2.79519	4.18274	10.6448	3.89129	6.02066	6.05291	7.02744	13.7987	7.05727	3.36138	3.89501	2.6906	3.65836	4.2154	4.1595	4.03881	2.30255	6.3253	28.3694	10.8183	0.53255	4.95377	2.83628
K00115	GLD; glucose 1-dehydrogenase (FAD, quinone)	1.28384e-08	5.01864e-09	1.1592e-09	1.39008e-08	1.56136e-06	5.88872e-09	1.26448e-08	1.52523e-08	9.46041e-09	3.90006e-06	3.62965e-08	3.75289e-06	2.99346e-09	1.39976e-08	4.34358e-09	3.51505e-06	1.11978e-08	5.01864e-09	1.24199e-06	5.071e-06	1.54514e-09	6.81283e-06	4.28642e-06	1.35149e-09	6.63342e-06	9.94318e-09	1.02323e-08	7.33567e-09	4.66542e-06	1.07516e-05	7.70076e-06	3.28257e-09	6.85426e-09	3.66852e-09	8.32028e-06	1.73743e-09	8.39804e-09	3.51196e-06	4.03087e-06	1.0426e-08	4.10656e-05	1.79218e-05	2.72902e-06	2.89663e-09	1.2357e-08
K00116	mqo; malate dehydrogenase (quinone)	238.649	224.2	136.855	199.181	131.071	139.205	169.776	116.222	247.341	177.902	123.37	106.798	254.842	266.998	219.511	145.219	87.246	192.14	141.766	122.848	132.214	315.222	230.722	150.106	187.637	155.94	160.935	118.077	140.055	187.902	118.144	138.243	81.4573	138.374	242.436	116.5	167.862	137.285	91.8162	216.826	288.008	185.664	215.867	281.644	210.266
K00117	gcd; quinoprotein glucose dehydrogenase	67.1165	53.6367	38.7796	48.0527	33.5513	41.3745	40.4829	30.3929	68.9046	53.6158	33.4335	43.5637	68.8194	64.6493	63.0339	42.883	21.2102	114.098	38.1332	32.1726	31.738	99.8976	62.2626	41.9046	65.6419	54.7748	36.2616	27.7594	42.4565	109.141	40.6775	40.1106	20.1227	34.682	120.533	28.9728	42.8755	37.7936	23.2531	62.7583	179.393	147.364	54.1352	51.8411	53.6417
K00118	Unclassified	56.4068	65.0715	37.7064	51.5381	38.7344	36.1715	44.5161	32.0834	61.393	52.1954	35.8369	24.3648	66.8519	62.174	55.8899	41.0292	19.1524	77.6494	36.2685	36.1283	33.8802	104.842	63.2207	35.7519	58.5573	41.4725	24.8955	27.1828	37.2351	73.7451	34.564	37.4748	20.1765	35.4954	58.6239	30.4865	40.7074	38.7486	28.2308	56.5606	142.706	84.8146	63.3215	50.322	55.1575
K00121	frmA; S-(hydroxymethyl)glutathione dehydrogenase / alcohol dehydrogenase	1330.59	1279.68	1199	1403.56	1142.62	989.617	1009.55	1730.47	1865.39	1508.71	1856.11	2655.7	1162.25	1339.8	1442.75	1624.24	2323.07	1397.41	1012.97	1242.53	1422.56	1506.98	1388.96	1161.99	1461.05	1392.28	1915.61	1443.23	1973.63	1417.38	2209.9	818.763	2269.36	1287.73	1402.41	1426.06	1770.04	899.145	1028.42	1671.74	1920.59	1331.75	1281.98	1476.58	1257.16
K00122	FDH; formate dehydrogenase	9.32127	3.93297	4.29606	3.82407	5.71803	7.58911	3.16238	5.92238	10.2193	11.8779	11.6552	13.6145	6.03388	7.64604	7.03368	6.72718	4.43601	15.8941	1.8788	3.77591	2.96866	9.08005	5.89729	5.40385	8.84443	5.47936	19.3416	3.65785	7.79155	17.7167	10.5349	16.8116	3.97544	1.26843	12.6905	3.10856	4.7337	3.47211	2.21787	13.163	36.438	26.4749	1.02387	17.3754	3.3834
K00123	fdoG; formate dehydrogenase major subunit	2781.03	3615.75	2617.22	3025.35	2229.1	3043.68	2723.48	3349.32	3751.67	2494.63	3558.91	5181.44	2480.68	3240.44	3431.85	3608.94	4590.54	3439.54	2479.53	2381.7	2965.19	3231.04	3086.99	2590.08	2607.5	3673.6	3815.66	3316.75	4150.18	3575.96	4440.44	2411.77	3342.65	2659.81	2961.14	2842.25	3866.87	2301.3	2242.67	3389.68	4587.42	2818.14	3142.11	2859.56	2890.04
K00124	fdoH; formate dehydrogenase iron-sulfur subunit	531.941	668.243	547.956	494.698	353.083	578.344	580.628	554.097	697.618	346.762	570.625	728.367	508.287	658.464	573.68	574.13	708.001	833.28	489.315	288.263	523.51	562.32	567.034	510.544	415.909	678.001	588.683	643.455	602.864	757.09	666.848	549.058	289.151	478.333	560.399	416.236	779.666	507.229	365.397	533.191	1037.56	624.076	590.254	398.355	440.172
K00125	fdhB; formate dehydrogenase (coenzyme F420) beta subunit	50.2297	83.9278	5.38426	18.8138	103.826	112.326	46.1795	95.3984	6.05589	54.7172	31.9663	34.0962	22.241	11.749	5.39793	59.143	20.7245	7.66729	5.43381	51.6782	12.0051	4.98544	64.0166	3.85121	32.0163	21.7691	15.4882	6.64337	10.7909	27.6906	78.0385	50.4638	52.3334	4.81878	20.0356	6.51059	17.4676	11.8971	4.40006	7.60693	17.5859	4.53137	12.9761	41.3525	7.3512
K00126	fdsD; formate dehydrogenase subunit delta	0.852225	0.237676	3.36981	0.152002	4.02724	1.5119	0.0595785	0.564246	5.95362	1.48041	1.60061	14.3957	4.6452	0.13262	5.40342	4.79177	1.44824	5.6741	0.116885	2.42247	2.06117	7.46328	3.05827	5.78452	7.03806	0.82282	5.83943	2.34618	2.49909	7.07387	3.22528	3.08695	2.07904	0.186295	2.27798	0.300065	0.745035	1.76239	1.05458	4.0725	13.975	14.5172	0.0130328	0.260026	0.16072
K00127	fdoI; formate dehydrogenase subunit gamma	379.291	385.151	428.714	343.538	258.827	367.313	400.714	425.956	651.09	274.253	469.969	447.487	414.159	539.107	340.459	442.175	344.117	859.989	332.825	165.896	417.827	497.432	490.39	446.088	322.742	448.24	365.705	544.01	374.43	711.374	433.314	447.072	180.708	480.681	443.902	320.398	643.496	397.011	250.753	452.81	928.945	535.406	499.269	241.009	305.087
K00128	ALDH; aldehyde dehydrogenase (NAD+)	6599.14	6936.37	5821.6	5319.69	5047.46	4539.8	4823	5913.42	8596.04	5538.17	6931.1	8549.85	6564.58	5757.74	6472.91	7084.2	8650.78	6044.85	5410.41	5602.96	6310.82	7253.82	6322.07	4638.01	5478.27	6849.35	6668.75	6837.43	7707.15	7267.65	7246.71	5372.23	6445.78	5207.4	6506.34	5623.31	7260.4	5054.07	4663.21	6792.89	7065.58	5740.06	6343.25	5951.26	6215.52
K00129	ALDH3; aldehyde dehydrogenase (NAD(P)+)	5.9841	16.8738	11.8399	38.5845	7.69238	18.5402	29.4128	14.3616	36.0088	15.2357	8.33764	11.5584	46.9607	20.038	37.7576	5.47715	7.04036	11.9286	0.448342	24.8989	30.4955	55.9814	10.64	25.9642	29.9637	10.8819	2.54142	21.3637	10.5566	14.7132	9.44413	24.3365	11.8655	49.4654	26.7856	24.0352	12.4589	40.5713	9.95309	3.71811	30.9336	28.4312	62.8828	26.6371	50.3358
K00130	betB; betaine-aldehyde dehydrogenase	1024.55	1004.02	920.247	1147.65	904.869	703.056	817.755	1468.74	1603.46	1199.71	1651.35	2401.51	839.125	1035.26	998.17	1393.11	1813.99	1087.64	781.877	1086.63	1165.52	1184.89	1017.79	837.28	1229.19	1056.23	1562.27	1213.7	1612.36	1109.03	1864.69	695.051	1816.02	1004.03	1162.82	1109.27	1502.55	701.067	889.022	1362.24	2071.75	1154.57	1074.98	1231.69	927.011
K00131	gapN; glyceraldehyde-3-phosphate dehydrogenase (NADP+)	1046.11	1004.44	677.628	694.173	795.234	574.209	699.402	787.876	1017.17	719.011	932.611	1303.42	782.581	652.681	824.489	838.566	1616.83	735.316	755.724	754.444	822.036	833.126	804.895	658.67	764.856	907.245	1063.87	762.643	1321.82	753.867	1053.3	745.256	1127.67	781.964	814.215	707.19	943.621	674.804	768.746	1064.8	1251.89	687.235	835.709	821.738	857.725
K00132	E1.2.1.10; acetaldehyde dehydrogenase (acetylating)	878.679	866.148	939.199	988.355	1183.5	653.36	1208	1257.93	1636.33	1090.66	1368.43	1509.21	1371.69	765.66	1213.9	1390.62	1796.93	955.614	1097.52	1046.17	1314.82	901.596	1227.15	1225.31	743.218	1018.57	1251.47	1110.61	1383.8	936.42	1335.77	852.282	1237.87	1155.37	1044.41	1182.11	1105.59	944.712	814.062	1404.46	586.321	830.955	888.11	1112.66	1178.4
K00133	asd; aspartate-semialdehyde dehydrogenase	20051.1	21208.3	16746.2	17664.3	16392.7	16081.2	16820.3	19826.2	25638.9	16813.5	20068	20758.9	20010.7	18312.2	20109.9	21392.5	23390.6	16662.2	18753.6	15738.8	19500.8	18238.3	19274.1	16923.1	17030.1	18244.4	19740.3	19850.4	22087.9	20363	20607.9	20138.2	17921.1	17233.9	18094.8	15140.7	18499.4	18063	13178.7	18479.3	17299.4	16174.1	19925.3	18513.8	19414.5
K00134	GAPDH; glyceraldehyde 3-phosphate dehydrogenase (phosphorylating)	21661.6	22816.9	18142.2	19497.8	17627.7	17199	17804.5	21916.2	27920.2	18161.4	21927	23189.9	21224.8	20290.1	22089.6	23150.8	25361.5	18216	19993.3	17484.9	21542.1	20215	20842.8	18016.9	18439.6	20322.7	22045.2	21506.7	24753	22418.6	23424.2	21463.6	20583.2	18733.3	19806.4	16711.2	20893.8	19094	14542.5	20994.7	20367.3	18001.6	21585.4	20472.7	21364.7
K00135	gabD; succinate-semialdehyde dehydrogenase / glutarate-semialdehyde dehydrogenase	2151.05	1815.93	1190.64	1401.1	1506.43	2063.87	1458.53	1739.99	3111.04	1428.05	1886.92	3526.09	1701.51	2020.16	2008.43	1866.26	3640.22	1164.29	1352.6	1974.1	2658.97	1866.88	1977.32	1028.77	1524.85	2099.06	2635.36	1591.08	4469	1854.5	2295.6	1649.3	2472.84	3021.75	1692.83	1964.5	1738.94	1770.21	1904.87	3021.32	2637.07	1547.75	1697.3	2177.37	2161.14
K00137	prr; aminobutyraldehyde dehydrogenase	7.69575	2.52835	0.372871	4.20353	3.79083	1.87302	3.84282	4.84779	3.4528	1.73002	10.9416	12.4368	2.64401	4.24183	1.40287	2.64579	4.78452	1.61035	6.59719	3.97845	0.779247	1.75712	1.23692	1.72187	7.02255	3.08903	4.39913	4.21926	6.978	6.95463	1.5131	1.34921	2.15335	1.92064	63.6267	0.66019	2.8102	1.63851	1.38683	3.27419	23.687	2.847	1.50141	1.01937	3.82953
K00138	aldB; aldehyde dehydrogenase	196.38	225.617	120.956	170.336	136.66	134.672	158.249	111.055	225.011	163.037	118.792	114.908	222.509	214.619	207.879	153.921	85.8308	143.911	130.197	123.118	129.885	266.045	210.365	136.429	168.547	140.856	116.49	107.759	132.892	140.908	113.304	129.033	88.7293	128.073	170.787	114.428	164.047	132.082	83.2716	188.437	212.443	153.928	178.836	192.938	195.827
K00139	ALDH5A1; succinate-semialdehyde dehydrogenase	6.59472e-06	2.57792e-06	5.95444e-07	7.14043e-06	2.23116e-06	3.02486e-06	6.49524e-06	7.83464e-06	4.85952e-06	2.6774e-06	1.86444e-05	1.93386e-05	1.53765e-06	7.19016e-06	2.23116e-06	4.26408e-06	5.75199e-06	2.57792e-06	1.83467e-06	3.71907e-06	7.93692e-07	7.93692e-07	1.78493e-06	6.94218e-07	6.49594e-06	5.10751e-06	5.25602e-06	3.76811e-06	1.00658e-05	8.5786e-06	1.63642e-06	1.68616e-06	3.52083e-06	1.88441e-06	5.50471e-06	8.92466e-07	4.31382e-06	2.6774e-06	2.18213e-06	5.35549e-06	3.2231e-05	4.71101e-06	1.58668e-06	1.48791e-06	6.34743e-06
K00140	mmsA; malonate-semialdehyde dehydrogenase (acetylating) / methylmalonate-semialdehyde dehydrogenase	1083.39	1014.64	791.242	889.608	740.788	842.44	817.421	1108.28	1195.98	806.806	1066.52	1615.54	796.092	952.362	1195.66	940.97	1721.03	964.296	708.713	727.166	920.16	905.474	941.997	748.179	791.746	1145.46	1085.96	860.788	1550.55	1131.53	1378.87	714.694	1260.38	659.392	1023.96	858.516	1064.08	689.052	638.808	1031.16	1270.04	813.228	725.574	769.343	947.061
K00141	xylC; benzaldehyde dehydrogenase (NAD)	18.1867	6.80111	2.08323	19.0737	6.35599	8.50712	16.9683	21.0565	13.5713	7.46205	49.047	57.4634	4.52392	19.1073	6.87312	12.1682	16.9522	8.295	5.27862	10.7276	3.28179	2.69453	5.12264	2.20853	17.8583	13.8026	14.9422	10.3206	28.2449	22.8377	6.65948	4.70596	10.3189	5.74328	15.2941	3.74837	11.3942	7.72338	6.31546	15.5724	84.5315	12.6698	4.13769	5.08304	17.0797
K00143	LYS2; L-2-aminoadipate reductase	6.42252e-05	2.51061e-05	5.79896e-06	6.95398e-05	2.1729e-05	2.94587e-05	6.32564e-05	7.63007e-05	4.73263e-05	2.60749e-05	0.000181576	0.000188337	1.4975e-05	7.00241e-05	2.1729e-05	4.15274e-05	5.60179e-05	2.51061e-05	1.78676e-05	3.62196e-05	7.72967e-06	7.72967e-06	1.73832e-05	6.7609e-06	6.32632e-05	4.97414e-05	5.11878e-05	3.66972e-05	9.80297e-05	8.35459e-05	1.59369e-05	1.64213e-05	3.42889e-05	1.8352e-05	5.36097e-05	8.69162e-06	4.20118e-05	2.60749e-05	2.12515e-05	5.21565e-05	0.000313894	4.588e-05	1.54525e-05	1.44906e-05	6.18169e-05
K00145	argC; N-acetyl-gamma-glutamyl-phosphate reductase	15064.6	17970.4	13386.8	14609	13028.2	12307	13036.3	16241.9	19212.3	13238.9	16053.7	16458.6	16304	14658.6	16070.6	17044.3	18604	13571.3	14735.1	12264.2	15096.1	14495.1	14971	13732.6	13796.3	13856.8	15460.4	15898.1	16890.3	16929.2	16859.7	16695.1	14407.4	12614.6	14441.4	12299	14888.8	13983.7	10025.2	13870.1	14316.3	12842.7	15754.3	14336.5	15447.7
K00146	feaB; phenylacetaldehyde dehydrogenase	507.377	536.474	487.572	627.527	500.019	413.599	415.911	812.334	855.771	623.312	805.202	1262.94	481.528	553.12	609.983	770.396	1139.06	551.81	438.531	657.221	741.201	636.343	543.656	482.41	497.357	570.345	897.964	643.458	957.408	571.257	1174.58	396.868	1181.72	586.882	588.522	693.989	791.621	304.925	515.315	852.148	746.366	545.723	589.644	691.564	565.494
K00147	proA; glutamate-5-semialdehyde dehydrogenase	16219.4	18534.6	14207.5	15368.3	14377.7	12871.5	14043.3	17546.4	21701.9	14242.7	17095.3	17801.9	17421	15432.3	17102.3	18426.1	20224	14541.9	15783.4	13670.9	16913.1	14940	16346.1	15141.1	14411.7	15369.2	16511.6	16940.7	18770.3	17779.6	18486.7	17771	15652.8	14247	15167.7	13373.8	15783.3	15230.2	11045.8	15243.2	15105.7	13709.4	16703.1	15334.9	17028.7
K00148	fdhA; glutathione-independent formaldehyde dehydrogenase	46.8083	24.1517	6.99674	46.7878	19.2623	22.4595	44.2128	52.7635	34.4177	20.5657	121.456	144.759	13.9378	47.9618	18.9323	35.5947	45.6654	20.6869	15.2668	28.9782	12.194	11.5773	15.1958	6.6745	45.6385	36.9252	41.992	26.234	73.107	61.0736	19.431	13.601	28.1126	15.3627	40.0918	11.7422	34.1408	20.0217	17.4015	41.0931	208.74	33.4696	12.3533	13.5551	43.6241
K00150	gap2; glyceraldehyde-3-phosphate dehydrogenase (NAD(P))	253.765	308.166	139.227	173.771	220.884	163.384	184.064	249.708	133.383	215.096	324.422	475.987	256.412	179.035	101.527	241.179	400.888	221.884	112.601	203.331	201.098	341.79	163.595	68.2972	195.933	409.411	259.314	217.01	427.65	403.118	314.996	140.408	394.814	53.699	271.669	137.182	303.847	189.634	227.682	312.543	659.095	218.478	186.484	237.008	148.936
K00151	hpaE; 5-carboxymethyl-2-hydroxymuconic-semialdehyde dehydrogenase	242.294	266.913	241.568	296.793	241.193	190.45	198.234	373.803	397.354	302.535	394.357	613.526	230.054	260.202	274.723	383.609	522.804	267.76	213.617	298.96	330.646	310.897	254.679	240.909	238.697	269.08	429.431	315.061	422.243	248.315	541.392	168.917	536.339	285.205	288.733	327.902	375.149	151.078	239.615	369.01	357.093	231.342	291.455	323.49	235.672
K00152	nahF; salicylaldehyde dehydrogenase	2.99751e-07	1.17175e-07	2.70649e-08	3.24555e-07	1.01414e-07	1.37489e-07	2.9523e-07	3.5611e-07	2.20881e-07	1.21696e-07	8.47448e-07	8.79003e-07	6.9891e-08	3.26816e-07	1.01414e-07	1.93816e-07	2.61447e-07	1.17175e-07	8.33916e-08	1.69044e-07	3.60759e-08	3.60759e-08	8.11309e-08	3.15544e-08	2.95262e-07	2.32153e-07	2.38903e-07	1.71273e-07	4.57523e-07	3.89925e-07	7.43806e-08	7.66413e-08	1.60033e-07	8.56523e-08	2.50207e-07	4.05654e-08	1.96077e-07	1.21696e-07	9.91847e-08	2.43424e-07	1.465e-06	2.14131e-07	7.21199e-08	6.76303e-08	2.88511e-07
K00153	Unclassified	25.3717	7.72885	5.58321	23.1098	10.155	12.9535	18.1919	26.8481	23.3026	10.9627	54.7388	112.231	7.93755	22.5357	12.6361	22.1735	30.891	19.2028	8.7367	17.7373	11.0248	6.6807	10.7044	4.87015	24.891	17.7641	30.0247	14.0852	42.4959	30.4632	22.9128	6.70326	18.8457	11.3557	22.1853	12.996	13.0063	12.8987	10.6665	27.6437	92.9893	16.5044	4.38928	19.1002	21.4639
K00154	Unclassified	10.5603	9.2526	15.2431	8.3667	7.69178	9.78982	7.39283	13.8116	22.9358	10.9644	15.3529	13.7603	17.3871	17.5917	8.21748	14.9229	4.7072	28.2299	7.70197	7.58097	12.9414	12.7235	14.376	11.1354	9.22398	17.0894	14.7695	16.9681	12.4088	35.9971	10.6145	13.7789	6.97794	13.9502	13.0056	7.65222	19.7745	13.2189	10.2163	12.8966	30.1417	17.6344	12.5533	10.2688	9.31993
K00156	poxB; pyruvate dehydrogenase (quinone)	456.444	708.839	494.388	557.37	321.484	518.681	600.441	542.007	756.31	576.504	678.699	507.511	707.921	754.351	842.877	638.458	271.1	1227.65	662.007	406.083	485.381	659.669	701.303	472.925	568.629	718.912	604.154	801.523	662.752	1719.99	477.907	730.725	505.173	458.367	499.166	312.882	651.014	531.11	681.222	646.267	1484.48	605.134	612.381	628.052	625.133
K00157	AOX; aldehyde oxidase	0.000134659	5.26393e-05	1.21585e-05	0.000145802	4.55587e-05	6.17654e-05	0.000132628	0.000159978	9.92279e-05	5.46705e-05	0.000380705	0.000394881	3.13976e-05	0.000146818	4.55587e-05	8.70694e-05	0.000117451	5.26393e-05	3.74626e-05	7.59408e-05	1.62066e-05	1.62066e-05	3.6447e-05	1.41754e-05	0.000132642	0.000104292	0.000107324	7.69421e-05	0.000205536	0.000175169	3.34145e-05	3.44301e-05	7.18927e-05	3.84782e-05	0.000112402	1.82235e-05	8.8085e-05	5.46705e-05	4.45575e-05	0.000109355	0.000658134	9.61955e-05	3.23989e-05	3.0382e-05	0.00012961
K00158	E1.2.3.3; pyruvate oxidase	1867.73	564.943	530.563	556.494	643.675	1087.24	441.47	979.455	1930.48	635.241	397.399	1247.85	835.373	695.128	902.642	968.98	2729.43	300.003	693.13	1259.41	1656.76	719.066	1385.09	244.378	647.355	897.775	1602.01	749.724	2282.58	582.152	1276.28	1328.39	1719.02	2187.54	657.486	1139.09	861.934	1090.44	1432.98	2344.52	832.488	746.889	915.12	1253.9	1434.13
K00161	PDHA; pyruvate dehydrogenase E1 component alpha subunit	3620.45	4633.33	3925.91	3540.56	3693.05	3333.8	2897.44	4177.38	4819.95	3353.52	4549.71	7885.9	3570.12	4997.65	4132.98	4502.93	6831.83	4588.62	3218.07	3913.39	5557.8	4393	3945.49	2560.75	3357.25	5432.47	6172.31	4091.95	7393.74	7036.13	6741.98	3317.12	6444.91	3326.93	4751.28	4611.47	5318.79	3254.51	3736.61	5179.41	7358.7	3365.67	3817.47	4466.72	3836.91
K00162	PDHB; pyruvate dehydrogenase E1 component beta subunit	3576.65	4510.72	3876.23	3472.63	3589.88	3294.82	2820.28	4108.87	4747.56	3299.15	4452.56	7687.69	3513.13	4866.72	4019.57	4443.43	6747.97	4525.43	3153.53	3833.39	5459.53	4349.17	3890.27	2507.89	3307.74	5384.71	6075.78	4039.74	7064.25	6943.99	6649.21	3260.39	6379.86	3201.21	4706.75	4464.02	5269.43	3201.18	3686.52	5117.2	7291.91	3332.65	3773.14	4420.66	3759.78
K00163	aceE; pyruvate dehydrogenase E1 component	62.8734	41.6959	62.7386	36.2429	21.4501	43.685	60.6704	92.1212	136.358	72.8427	112.496	179.035	117.382	85.108	60.1871	76.4276	49.8212	98.3161	63.9481	44.1106	33.4937	106.882	63.9466	69.8808	54.954	62.1079	70.5211	76.3767	95.552	144.231	69.4095	51.4857	41.2456	35.3088	147.923	57.8148	88.1454	34.9305	48.9634	72.0464	209.981	120.697	36.7702	78.7436	80.8099
K00164	OGDH; 2-oxoglutarate dehydrogenase E1 component	525.528	713.061	406.233	381.104	421.66	392.177	417.915	378.791	663.797	453.631	591.78	379.004	628.904	646.8	504.152	440.514	228.641	934.463	390.503	339.209	368.827	803.673	545.785	362.683	441.638	593.71	434.4	372.149	460.816	1205.48	330.281	419.764	243.134	368.923	559.353	321.924	516.175	356.449	387.155	493.994	1547.61	595.062	493.305	510.604	511.164
K00166	BCKDHA; 2-oxoisovalerate dehydrogenase E1 component alpha subunit	34.4738	22.5139	14.5431	25.2658	13.5146	15.5548	33.9633	26.7571	23.4477	32.2386	193.495	106.948	18.8323	29.8829	19.179	29.3447	48.5559	654.849	33.8075	24.0573	24.4975	25.8349	16.6767	9.05104	39.609	40.4849	109.468	20.0203	106.172	1007.19	32.5584	17.9058	24.8951	12.9697	33.6284	19.1262	37.8463	14.9105	168.339	44.2157	1013.86	83.7983	18.8349	33.798	24.9971
K00167	BCKDHB; 2-oxoisovalerate dehydrogenase E1 component beta subunit	57.1193	68.5052	191.186	49.0616	92.2248	46.5629	61.1627	73.4163	57.1983	61.7137	223.735	248.178	52.4257	228.507	52.4161	90.6033	108.052	707.979	69.4649	42.2132	241.103	115.024	55.5221	43.6172	78.7747	157.803	300.611	70.105	199.242	1178.87	318.731	59.8709	219.353	40.8667	173.402	42.4143	160.109	76.3735	247.909	106.496	1062.47	117.211	105.564	170.406	59.6939
K00169	porA; pyruvate ferredoxin oxidoreductase alpha subunit	2465.94	2724.8	2810.88	2499.35	2435.81	2424.76	1915.94	2892.15	3353.37	2406.06	2808.45	4758.77	2346.51	2735.22	2590.6	3177.86	4655.12	2913.44	2265.94	2263.46	3179.79	2800.92	3009.14	2082.74	2466.93	3279.67	3663.15	2949.24	3578.94	3473.06	4263.31	2371.43	3793.71	2172.89	3220.57	2669.6	3252.81	2286.58	2185.65	2889.92	3611.41	2121.48	2438.25	2490.07	1882.39
K00170	porB; pyruvate ferredoxin oxidoreductase beta subunit	2512.52	2822.32	2835.43	2599.33	2443.01	2457.68	1964.58	2900.49	3419.32	2465.5	2834.3	4774.01	2302.02	2785.27	2682.78	3265.61	4669.8	2958.1	2344.39	2244.45	3246.37	2774.46	3128.03	2134.2	2492.28	3318.44	3684.56	3059.06	3549.65	3522.64	4346.36	2198.77	3882.47	2198.33	2952.15	2730.56	3259.99	2259.01	2178.58	2871.41	3670.32	2168.79	2465.02	2514.29	1875.04
K00171	porD; pyruvate ferredoxin oxidoreductase delta subunit	2152.12	2476.63	2417.47	2210.19	2108.69	2134.85	1645.95	2490.45	2849.53	2125.79	2375.23	4235.97	1903.57	2367.73	2286.68	2787.39	4114.88	2348.27	1967.41	1979.7	2758.8	2308.65	2634.45	1760.58	2124.77	2929.28	3203.39	2566.89	3163.53	2986.51	3810.71	1770.83	3478.96	1777.01	2535.61	2308.75	2738.46	1842.43	1864.53	2393.23	2974.69	1764.36	2048.01	2189.12	1632.6
K00172	porC; pyruvate ferredoxin oxidoreductase gamma subunit	2618.09	2786.27	2889.93	2613.13	2478.56	2457.92	1949.63	3024.52	3577.06	2532.68	2877.29	4913.92	2384.06	2837.73	2706.5	3212.36	4792.74	2959.21	2297.08	2301.94	3262.36	2836.41	3242.58	2141.32	2589.27	3378.27	3716.49	3038.99	3616.61	3554.58	4360.03	2376.02	3925.55	2213.37	3302.62	2734.74	3257.16	2329.4	2229.79	2889.17	3672.56	2154.48	2488.05	2506.41	1941.86
K00174	korA; 2-oxoglutarate/2-oxoacid ferredoxin oxidoreductase subunit alpha	22231.1	25068	16975	19893.9	17215.9	15163.7	18407.8	21197.7	24742.2	19160.8	20978.6	15285.9	21341.1	20371.8	21061.9	22092	18458.1	16008.5	20099.3	15382.7	19407.3	19244.3	19408	17183.9	19640.9	18849	17227	21454.8	20292.1	19909.4	17761.4	21813.7	16800.8	16455.3	16142.9	13433.6	19178.1	18971.9	12375.9	17510.7	16707.8	18271.2	21595.3	19390.2	22579.1
K00175	korB; 2-oxoglutarate/2-oxoacid ferredoxin oxidoreductase subunit beta	21542	24175.9	16566.8	19255.8	16899.4	14903.7	18056.4	20563.7	24225.1	18557	20364.9	14852.2	20591.3	19925.2	20734.5	21378	17672.5	15693.1	19810	14882.2	18917.5	18796.1	18782.1	16964.6	18935.8	18521.9	16805.1	20964.9	19829.3	19554.3	17284.7	21242.8	16290.3	16309.7	15654.4	12906.5	18481.1	18609.5	12023.9	17091.2	16324.1	17732.9	21066.3	18887	21888.6
K00176	korD; 2-oxoglutarate ferredoxin oxidoreductase subunit delta	12405.9	14371.7	10463.3	11177.2	10229.8	9081.16	10432.5	12425.3	14276.3	10752.9	12038.6	10359.8	11491	11856.3	12068.6	12965.3	11713.6	9730.9	11808.1	9011.57	11846.1	11243.6	11207.4	9864.55	10894.7	11614.6	10882.9	12264.3	12308.9	11750.8	11691	12264	10752.7	9439.17	9724	8135.26	11590.4	10791.3	7481.65	10461.6	10511.1	10485.2	12328.5	11350.6	12273.2
K00177	korC; 2-oxoglutarate ferredoxin oxidoreductase subunit gamma	12698.9	14544.1	10670.4	11496.4	10370.3	9280.41	10775.3	12604.7	14659.3	11000.2	12324.5	10538.3	11880.6	12255.2	12429.7	13191.3	11880.3	9898.11	12138.4	9165.95	12028.3	11686	11585.2	10024.2	11263.2	12024.6	11171.2	12669.4	12634.1	12051.3	11870.1	12581.6	10861.2	9576.67	9981.51	8313.83	11942.6	11168.5	7644.2	10735.2	10772.7	10834.9	12634.6	11654.8	12475.1
K00179	Unclassified	12385.2	13416.7	10140.7	11309.4	9897.41	9259.48	9422.18	11585.7	14323.2	10059.5	11823.9	10948.1	11787.9	11189.1	12081.8	12514.1	13265.2	9001.49	10600.9	8973.33	10830.1	10928.3	10876.1	10519.4	10489.1	11033.8	10921.7	12150.4	12191.8	11960.9	12106	11978.7	10836.3	8879.19	10532	8051.66	11402.3	10348.2	7020.47	10126.3	10336.3	9952.35	12106.6	10835.7	12021
K00180	Unclassified	13023.4	13951.6	10526	11779.9	10574.6	9735.57	9945.1	12165.1	15196.6	10603.6	12290.5	11122.1	12288.7	11690.3	12676.1	13202.4	13462	9539.73	11378.7	9407.8	11486.2	11399.2	11299.7	11385.9	10897.5	11577.3	11348.3	12809.2	12659.6	12482.4	12350	12819.1	11140.4	9728.84	10814.4	8405.45	11624.4	11114.2	7321.79	10654.5	10637.4	10360.1	12883.2	11377.7	12642.1
K00183	Unclassified	37.58	25.4552	27.9087	18.0345	9.02712	51.0356	50.0122	48.3571	56.5016	29.3327	13.9993	140.493	45.1787	14.6607	18.0294	31.3638	154.878	44.4371	33.9338	30.242	41.5086	17.9121	33.6127	9.062	12.4889	102.891	105.025	40.4281	120.946	67.5069	83.9407	47.2566	22.8924	23.1553	46.5198	49.9347	100.614	29.5369	34.8657	67.1072	38.1709	16.3451	29.468	73.5241	13.8775
K00184	dmsB; dimethyl sulfoxide reductase iron-sulfur subunit	964.505	1305.68	943.287	870.573	697.188	951.83	1069.59	943.148	1498.44	869.965	1207.65	930.517	1283.24	1434.33	1138.94	929.494	819.321	2003.22	825.178	557.829	849.524	1458.15	1167.83	888.743	905.566	1572.79	1154.19	991.548	1177.12	2317.33	919.512	948.451	453.731	902.991	968.403	798.666	1383.93	834.713	744.268	994.557	2821.36	1366.61	1201.31	1010.61	943.751
K00185	dmsC; dimethyl sulfoxide reductase membrane subunit	730.041	1113.04	607.895	666.112	505.78	726.191	809.467	603.077	941.678	636.926	914.642	651.48	900.472	1115.9	932.421	628.244	508.718	1408.46	576.933	439.899	499.937	1130.95	780.22	554.234	728.263	1298.18	819.053	608.256	959.393	1866.62	580.731	605.938	270.413	523.919	687.767	509.647	887.508	564.391	565.798	667.766	2400.1	1054.59	864.855	796.827	784.54
K00186	vorA; 2-oxoisovalerate ferredoxin oxidoreductase alpha subunit	63.821	98.7329	35.3265	21.6538	109.873	92.3153	57.9568	108.2	52.0627	99.929	38.223	19.7606	13.2708	17.8565	9.26757	65.6193	26.7825	93.5524	1.00687	36.9262	14.2101	40.476	91.7355	7.00527	174.004	24.1657	3.15548	13.6669	35.8718	84.2615	80.5533	41.4167	46.838	7.98746	32.6299	14.2909	66.3126	42.3138	11.043	22.4331	86.331	174.776	16.4611	46.5593	20.1481
K00187	vorB; 2-oxoisovalerate ferredoxin oxidoreductase beta subunit	74.1982	106.51	41.5006	26.3318	116.048	96.5901	68.1963	118.849	66.049	106.052	49.5996	45.5317	32.0422	29.4917	16.0542	71.101	51.306	93.125	10.243	48.1703	26.3818	51.2954	101.221	12.1138	183.434	38.9809	19.4992	20.8631	51.3584	96.4701	80.091	55.5191	55.4178	12.952	45.3799	23.5121	84.4794	62.1338	17.2186	51.1403	104.314	182.177	18.2753	62.1321	24.1809
K00188	vorD; 2-oxoisovalerate ferredoxin oxidoreductase delta subunit	34.0122	67.0691	1.17483	9.70442	81.3974	87.7091	30.1253	64.5459	0.614917	36.0519	17.9822	1.15427	5.40161	0.283036	0.570604	42.4246	7.66411	56.858	0.475126	35.8328	4.08956	2.55769	45.5026	0.0117041	35.0026	13.9752	1.56815	0.225342	4.51328	60.6379	56.8905	31.6627	37.1419	0.623365	10.6312	1.02131	2.01713	0.165707	0.510065	12.2119	39.1088	79.7721	6.73854	22.0058	0.698609
K00189	vorG; 2-oxoisovalerate/pyruvate ferredoxin oxidoreductase gamma subunit	86.3388	139.264	104.719	118.431	112.917	92.6591	80.6174	145.83	116.651	91.3643	120.178	214.346	90.3154	94.4522	117.262	145.171	198.441	136.633	110.856	103.758	108.138	117.301	108.238	88.5763	98.6249	116.093	177.794	103.366	136.665	119.384	180.681	100.903	156.643	102.666	118.395	152.086	141.021	88.2405	97.1041	134.29	138.302	81.2734	115.599	108.804	68.9784
K00192	cdhA; anaerobic carbon-monoxide dehydrogenase, CODH/ACS complex subunit alpha	1.16162	0.459107	0.0647308	0.958122	0.188339	1.04162	1.03651	1.11557	1.03103	2.14821	2.04251	2.147	3.81049	2.85261	0.180595	0.342048	2.03261	1.79267	0.932282	0.276518	0.0666183	1.80038	0.745993	0.0525217	1.1046	5.27527	1.37769	1.56317	2.05358	9.32658	0.534337	0.572618	0.270445	0.558643	0.834035	0.699627	2.50427	0.319296	0.474811	1.191	3.82144	0.822447	1.54506	2.01701	0.461217
K00193	cdhC; acetyl-CoA decarbonylase/synthase, CODH/ACS complex subunit beta	0.849637	0.204514	0.0535301	0.490775	0.182762	0.222629	0.456954	0.544812	0.35293	4.08089	2.74934	1.35859	7.19144	5.02407	0.172278	0.333011	0.527707	1.32351	0.570295	0.266142	0.0629547	1.78903	0.137406	0.047715	1.09582	6.66898	0.413793	1.87396	0.916972	13.1115	0.122997	0.115893	0.26512	0.150526	0.762115	0.0970719	0.871486	0.30459	0.166787	0.368094	3.78796	0.817398	2.05233	2.55859	0.457278
K00194	cdhD; acetyl-CoA decarbonylase/synthase, CODH/ACS complex subunit delta	356.536	387.746	421.656	419.261	361.5	306.649	284.7	489.881	585.566	387.538	526.587	941.692	492.653	397.373	431.967	562.137	852.813	389.794	354.981	463.858	499.535	585.452	445.855	345.975	386.355	488.448	681.606	472.258	620.536	446.948	750.452	439.357	663.507	400.216	493.178	489.709	575.82	449.038	423.139	623.292	561.749	343.941	396.683	515.321	330.77
K00195	cdhB; anaerobic carbon-monoxide dehydrogenase, CODH/ACS complex subunit epsilon	0.627592	0.114324	0.0311947	0.259052	0.103328	0.120946	0.243653	0.289049	0.190705	2.05051	1.41419	0.723979	3.7426	2.6067	0.095349	0.185089	0.309413	1.23584	0.510755	0.142935	0.0351896	1.76327	0.0759624	0.0251859	0.884007	3.83086	0.230669	1.0251	0.584787	8.71013	0.0673771	0.0611731	0.145335	0.0843525	0.578454	0.0595712	0.719445	0.217702	0.0919563	0.194295	2.74199	0.662618	1.0292	1.29037	0.246269
K00196	cooF; anaerobic carbon-monoxide dehydrogenase iron sulfur subunit	3434.9	3680.86	3287.49	3498.8	2936.59	3157.66	2621.94	3772.45	4525.95	3029.72	4098.26	4958.1	3849.23	3101.43	3541.41	4108.49	5813.8	2894.36	3194.06	3151.05	3484.26	3501.33	3570.33	3743.28	3019.08	3548.69	4512.42	3739.82	4272.17	3906.32	5273.37	3629.46	4409.06	2830.22	4057.55	2931.43	3962.5	3457.7	2761.78	3696.63	3842.17	2747.98	3900.9	3461.62	3235.17
K00197	cdhE; acetyl-CoA decarbonylase/synthase, CODH/ACS complex subunit gamma	387.57	420.041	456.394	429.619	390.714	312.91	313.735	535.381	637.585	451.22	543.936	960.214	500.353	413.918	441.368	582.069	874.477	430.297	356.1	466.726	510.544	621.65	492.879	354.266	525.241	496.235	684.716	485.427	646.07	470.454	775.115	451.969	674.596	408.376	515.561	504.053	642.792	494.08	434.342	632.572	626.882	437.296	406.539	541.377	347.087
K00198	cooS; anaerobic carbon-monoxide dehydrogenase catalytic subunit	3561.67	3616.6	3434.46	3676.51	3001.1	3368.62	2407.56	4162.5	4978.55	3210.15	4356.38	5259.46	4017.56	3332.25	3908.51	4227.68	5698.57	2982.51	3045.39	3286.44	3567.62	3926.06	3682.14	3947.68	3233.49	3412.89	4658.25	3641.32	4430.43	4381.34	5123.67	3948.77	4724.75	3181.31	4286.64	3203.52	4145.22	3781.51	2828.54	4026.43	3571.96	2868.29	3844.23	3608.77	3698.09
K00200	fwdA; formylmethanofuran dehydrogenase subunit A	70.0955	80.4775	7.50167	48.1802	95.3716	106.982	65.823	107.761	32.1435	61.7908	122.922	116.188	33.1091	49.62	18.6489	69.1597	38.5274	15.6133	11.0335	57.5579	11.9604	13.5294	59.3793	8.64912	57.8423	48.1001	33.9643	24.6173	59.629	70.1844	71.8635	44.2674	59.1815	10.811	43.2111	6.52872	26.4879	16.7452	13.9695	33.2982	180.953	32.8918	20.4733	36.6228	34.9296
K00201	fwdB; formylmethanofuran dehydrogenase subunit B	53.9802	74.182	6.04937	30.7208	89.9246	99.5896	49.9442	88.6064	20.2667	56.9073	77.9597	68.9109	32.2561	33.9062	13.1988	58.7449	24.5013	9.31478	6.54752	48.4673	10.0221	11.5888	55.0191	6.95166	41.96	37.8971	21.1278	16.0249	35.0233	52.7334	67.8653	40.1445	50.5793	6.20942	29.7574	4.35685	15.9546	10.1985	8.63873	20.2033	102.144	21.2657	17.4243	34.0303	19.4153
K00202	fwdC; formylmethanofuran dehydrogenase subunit C	53.329	73.7884	5.95968	29.6159	89.5851	99.1244	48.9411	87.3952	19.5184	54.839	74.4562	65.9241	29.3989	31.0882	12.8573	58.0929	23.6369	10.0487	6.7078	47.8938	9.90096	13.2004	54.7458	6.84423	41.6007	35.794	20.3246	14.9824	33.6722	52.1569	67.6141	39.8836	50.039	5.9219	29.2724	4.2257	15.8215	9.9048	8.30433	19.3746	98.7289	21.1321	16.3481	32.7696	18.4372
K00203	fwdD; formylmethanofuran dehydrogenase subunit D	35.9461	67.204	1.25912	11.4305	82.7509	90.0509	32.3916	67.3117	1.89108	45.7342	25.2603	9.00662	20.972	11.5856	1.9518	44.0357	8.7451	2.34199	1.59104	38.2386	6.36333	2.49134	47.2425	0.764793	22.1412	20.5535	3.58911	4.88167	6.30796	24.0907	60.7201	33.0705	39.2402	1.10811	12.8363	1.928	3.59568	1.37771	1.82729	3.23949	10.0831	2.0726	11.8494	28.3873	2.25684
K00204	fwdH; 4Fe-4S ferredoxin	33.4015	65.0885	0.002511	9.72718	81.5979	88.3985	30.1265	65.0994	0.0133134	35.9481	17.5261	0.0490548	5.14698	0.179117	0.00698815	41.7837	3.91516	1.13716	0.44861	35.9499	3.89263	1.73638	45.6556	0.00167067	20.0911	6.8109	0.0171424	0.170882	0.228205	4.29655	57.3148	32.0541	36.9205	0.00633165	10.0878	0.00520388	0.539266	0.12701	0.00668879	0.0128883	1.65023	0.501639	6.80382	21.3763	0.0170722
K00205	fwdF; 4Fe-4S ferredoxin	80.1374	151.198	13.3303	34.9537	176.944	207.956	85.2702	155.432	10.9272	94.9477	48.9567	30.3782	31.5896	20.5192	39.4841	115.676	21.0924	24.744	33.5884	84.3698	34.3789	18.172	106.948	19.0285	50.1027	35.8465	30.5743	23.387	14.3558	36.1519	150.704	95.6759	100.752	25.164	36.7807	19.9762	26.5927	19.6224	10.9428	6.15787	27.1038	11.3269	25.8461	59.3911	10.147
K00207	DPYD; dihydropyrimidine dehydrogenase (NADP+)	39.1654	98.0291	35.5187	51.9124	17.7812	72.337	63.0039	32.708	30.2495	19.5346	30.8881	37.7254	25.7997	68.0797	71.3288	50.0171	26.9793	66.4896	41.5655	14.5121	21.3877	46.9475	41.0732	37.5938	31.6515	77.4656	33.7984	47.0077	47.5721	47.0321	50.3325	36.7803	0.00647288	21.9153	32.4981	29.0193	63.8962	29.0155	22.4815	33.811	65.9727	66.8322	60.7848	23.9088	41.9005
K00208	fabI; enoyl-	9474.8	10008	6416.31	7903.44	6940.23	6530.33	7393.49	8004.77	11100.8	7777.98	8376.19	5198.62	9063.01	8516.3	8928.53	8544.18	6805.3	6809.75	8065.38	6588.87	7905.25	7790.2	7745.49	7173.14	7693.07	7324.12	6482.96	8732.38	8970.49	8667.93	6270.35	9282.98	6005.67	7617.97	5990.99	5580.12	7231.32	7847.74	5122.66	7501.59	6986.2	7523.01	9059.62	7805.63	9934.44
K00209	fabV; enoyl-	1193.25	955.646	940.353	976.833	848.99	994.998	717.186	1407.8	1406.9	1029.66	1103.48	1507.33	1033.27	989.167	1088.2	1015.69	1685.13	923.583	946.176	854.696	1060	1291.22	1054	1014.92	1055.61	1099.94	1138.51	1174.37	1385.9	1163.63	1170.28	1205.72	1343.29	797.742	1203.57	844.806	1132.5	1025.34	783.476	1181.91	1615.88	869.475	887.308	946.974	1034.06
K00210	Unclassified	4300.23	4432.93	2532.41	4034.06	2223.18	1871.6	2922	3340.42	3771.97	3581.04	4024.2	1320.59	4942.74	3567.75	3273.22	3680.46	3483.73	1600.33	2488.45	2611.62	2591.49	2966.2	3650.39	2006.64	4144.18	1952.99	1890.41	3626.12	2733.06	2529.1	2510.42	3388.52	2371.99	1323.43	2343.9	1994.26	3156.57	2625.62	1495.12	2275.14	1444.53	3123.77	3160.49	2995.49	4835.37
K00211	TYR1; prephenate dehydrogenase (NADP+)	0.13784	0.0552578	8.36759e-06	0.000100342	0.0112711	0.275843	0.137838	0.275911	0.412625	0.441702	0.000262004	0.385418	0.330737	0.000101041	0.174664	0.404539	0.165439	0.109182	0.0089656	0.254897	0.268733	2.09616	0.314721	0.2482	0.047885	0.28385	7.38612e-05	0.0828853	0.0336785	0.325803	0.478413	2.36951e-05	0.148369	0.110163	0.47361	0.275813	1.04566	0.163099	0.332203	0.165433	0.709	0.290941	0.162238	0.137768	0.329814
K00213	DHCR7; 7-dehydrocholesterol reductase	0.0109001	0.00426092	0.000984181	0.0118021	0.00368778	0.00499964	0.0107357	0.0129495	0.00803207	0.00442534	0.0308164	0.0319639	0.0025415	0.0118843	0.00368778	0.00704789	0.00950718	0.00426092	0.00303243	0.00614708	0.00131185	0.00131185	0.00295023	0.00114744	0.0107368	0.00844195	0.00868742	0.00622813	0.0166373	1.46644	0.00270476	0.00278697	0.0058194	0.00311464	0.00909846	0.00147511	0.0071301	0.00442534	0.00360673	0.00885184	0.0532731	0.132611	0.00262255	0.00245929	0.0104914
K00214	BLVRA; biliverdin reductase	1.24742	1.55457	1.09287	2.2694	0.688854	1.0394	1.01441	0.72854	0.926378	1.98797	3.6082	7.4013	1.97416	1.77263	1.45874	1.3759	4.21123	0.686856	0.772364	1.87624	2.22878	1.97124	1.1972	0.610503	0.812422	3.64062	3.15223	0.938606	7.32664	4.73923	4.01411	0.677563	1.58656	0.707884	1.64745	1.66264	2.13253	0.726502	2.04281	3.18853	4.10572	2.39905	0.663386	1.57849	1.0081
K00215	dapB; 4-hydroxy-tetrahydrodipicolinate reductase	20841.1	22342.7	17391.5	18251.6	17041.8	16806.4	17165.4	20787.1	26497.4	17500	20936.2	21766.8	20760.4	19072.8	20784.8	22211.8	24412.6	17675.4	19086	16494.2	20098.1	18983.3	20010.5	17556.5	17932.9	19241.5	20280.3	20536.6	23101.9	21586.5	21631.4	20745	18898.9	17831	19298.3	15924.1	19576.1	18682.1	13744.8	19175.6	18790.7	16903.5	20372	19104.4	20117.9
K00216	entA; 2,3-dihydro-2,3-dihydroxybenzoate dehydrogenase	12.3311	8.32511	5.89827	5.93396	5.83664	5.74648	6.35875	8.17425	10.8057	5.82442	11.9915	34.2531	6.14855	7.21479	8.65951	10.0768	15.4304	6.06843	10.9945	7.99342	8.50553	5.81917	9.15316	4.73895	7.51551	9.28487	17.4211	7.13348	16.4338	18.2651	13.6633	5.24851	7.4477	6.87456	69.0637	7.32972	9.68693	5.71994	6.448	12.4905	23.2628	7.08087	4.96888	9.49455	6.56467
K00217	E1.3.1.32; maleylacetate reductase	1.87405	0.158778	0.229734	0.290058	0.318075	0.271942	0.130513	0.366439	0.552759	2.11898	0.493353	3.03819	0.264705	1.35823	0.317672	0.444882	0.809617	2.82465	0.206452	0.486301	0.441776	0.670622	0.291482	0.196444	1.15882	1.34896	0.789923	0.313427	0.970504	4.08245	1.46602	0.145687	1.32325	0.324247	0.4298	0.512512	0.130227	0.308361	0.258612	1.16229	12.1512	3.50559	0.0294045	1.16712	0.301222
K00218	por; protochlorophyllide reductase	11.4395	8.02049	24.0629	15.5156	11.3558	12.7205	7.15975	7.36832	22.56	11.6637	23.8255	55.2602	48.6545	13.6601	11.0057	17.3991	42.207	5.417	15.881	22.4871	19.8038	59.1201	11.0365	6.20739	8.57426	31.0061	38.9527	9.4288	40.8264	25.0948	28.9207	49.9813	15.9743	11.7452	33.9488	18.1632	31.1141	50.5369	32.9086	48.0058	13.6291	11.8414	4.09592	19.8148	12.3529
K00219	Unclassified	890.342	991.576	958.552	901.235	825.494	839.821	823.822	1008.2	1150.51	791.458	1045.06	1856.04	840.08	968.312	927.665	1207.04	1641.05	1308.63	861.4	894.529	1047.93	1037.9	992.177	796.479	821.392	1360.17	1420.16	1205.72	1470.46	1382.54	1499.67	940.706	1270.34	885.661	1300.46	1041.14	1351.2	746.238	716.594	1226.92	1521.71	950.56	994.508	1033.44	823.021
K00220	tyrC; cyclohexadieny/prephenate dehydrogenase	18.8525	14.4403	11.9056	6.71635	16.2566	8.99669	8.64936	10.6872	13.0676	26.4053	77.727	38.8158	18.5347	14.7082	10.1005	15.5425	9.72165	298.948	10.8288	9.47303	8.93858	45.775	8.29938	10.4937	24.4774	13.6091	36.9071	8.85754	28.6547	437.625	16.7233	24.4592	6.32989	1.89875	15.5404	4.32517	7.67179	4.64407	71.4923	24.3463	518.264	60.7667	19.1536	2.33861	5.08072
K00221	Unclassified	3.56862	1.14281	0.444625	3.393	1.06933	1.43012	3.24216	3.53575	2.65116	1.25621	8.4605	10.2287	1.02377	3.58644	1.12169	3.1078	2.84722	1.94325	1.32622	1.80206	0.909302	1.04784	0.86332	0.747174	3.16127	2.63259	2.66855	2.28225	5.01281	4.03057	1.12554	0.785273	1.73516	0.966	3.18512	0.913205	1.91462	1.42546	2.76948	2.9001	15.2087	2.40372	0.696511	1.3844	2.87036
K00222	TM7SF2; Delta14-sterol reductase	0.8535	0.333639	0.0770634	0.924127	0.288761	0.391482	0.840626	1.01397	0.628928	0.346513	2.41299	2.50284	0.199005	0.930564	0.288761	0.551865	0.744433	0.333639	0.237446	0.481329	0.102721	0.102721	0.231009	0.0898469	0.840717	0.661023	0.680243	0.487676	1.30273	1.11026	0.211788	0.218226	0.455672	0.243883	0.712429	0.115504	0.558302	0.346513	0.282415	0.693118	4.1714	0.609708	0.205351	0.192568	0.821496
K00223	ERG4; Delta24(24(1))-sterol reductase	6.59058e-06	2.5763e-06	5.9507e-07	7.13594e-06	2.22976e-06	3.02296e-06	6.49117e-06	7.82972e-06	4.85647e-06	2.67572e-06	1.86327e-05	1.93265e-05	1.53668e-06	7.18565e-06	2.22976e-06	4.2614e-06	5.74838e-06	2.5763e-06	1.83352e-06	3.71674e-06	7.93194e-07	7.93194e-07	1.78381e-06	6.93782e-07	6.49187e-06	5.1043e-06	5.25272e-06	3.76574e-06	1.00595e-05	8.57321e-06	1.63539e-06	1.6851e-06	3.51862e-06	1.88322e-06	5.50125e-06	8.91905e-07	4.31111e-06	2.67572e-06	2.18076e-06	5.35213e-06	3.22108e-05	4.70806e-06	1.58569e-06	1.48698e-06	6.34345e-06
K00226	pyrD; dihydroorotate dehydrogenase (fumarate)	9608.87	9498.17	6021.09	6865.67	6720.56	5968.18	6600.42	7344.08	10330.5	6840.95	7247.35	4716.54	7982.23	7595.31	7923.94	7939.23	7232.7	5069.8	7440.15	6136.52	7583.46	7528.29	6942.47	6215.17	7248.07	6949.64	6128.64	8033.77	8726.12	6624.36	5498.9	8348.5	5543.64	7878.99	5341.59	4953.86	6494.83	7286.81	4588.24	7055.57	5197.89	6769.74	8599.29	7297.58	9254.1
K00227	SC5DL; Delta7-sterol 5-desaturase	0.00270369	0.00106624	0.000159582	0.00191367	0.00517359	0.145201	0.00267703	0.00397436	0.00410656	0.0149743	0.681956	0.0185365	0.00266	0.670002	0.320832	0.0140253	0.00266551	0.00143277	0.00413105	0.0173614	0.00203923	0.0341426	0.0149936	0.00187302	0.0211975	1.5057	0.672445	0.00157289	0.556758	0.439347	0.0259335	0.000451898	0.00195174	0.00125363	0.0287057	0.00211383	0.00826315	0.0119592	0.0144781	0.00255925	1.06427	0.432081	0.00940482	0.464541	0.137574
K00228	CPOX; coproporphyrinogen III oxidase	280.925	244.241	202.392	238.267	142.899	190.031	221.153	183.038	378.145	248.051	220.552	134.081	392.557	391.227	310.553	175.955	85.9773	253.518	191.886	147.156	145.407	385.7	294.663	210.846	216.525	329.641	207.04	173.141	230.453	271.372	147.775	191.195	93.231	167.255	313.315	151.95	213.121	172.788	126.203	244.78	499.898	289.579	254.146	282.33	276.384
K00230	hemG; menaquinone-dependent protoporphyrinogen oxidase	1036.18	1129.92	1006.4	1040.04	936.667	816.973	907.995	1199.86	1515.08	1068	1296.11	1569.38	1126.01	1071.3	1119.02	1194.73	1755.44	1257.84	1003.16	996.744	1215.9	1374.37	1133.51	991.008	1086.36	1099.91	1426.66	1304.76	1476.94	1278.45	1494.22	997.788	1432.97	1221.19	1168.78	1232.34	1373.19	1010.47	899.967	1331.03	1706.57	1072.46	1279.83	1150.24	1124.99
K00231	PPOX; protoporphyrinogen/coproporphyrinogen III oxidase	897.092	1060.49	702.676	791.484	618.739	750.117	909.507	815.044	1084.42	896.184	1132.94	700.96	827.725	931.687	919.836	898.841	497.568	614.921	748.036	640.979	711.803	978.491	885.482	586.898	1118.48	884.187	864.36	736.797	1204.37	1118.95	634.049	817.847	629.413	644.558	803.183	559.361	871.822	874.948	648.622	811.155	1186.3	1013.96	852.614	912.275	1096.25
K00232	E1.3.3.6; acyl-CoA oxidase	37.7103	66.547	11.6924	28.6749	41.363	26.6504	37.7262	38.3974	29.7946	22.5467	91.7831	75.7882	16.2596	47.2486	29.6129	53.41	32.336	11.5855	21.9669	28.9154	25.9896	34.121	24.1197	9.82407	34.6554	64.8265	54.9389	11.8232	52.993	45.8438	22.1309	20.3768	28.4288	20.4369	31.7224	22.1665	43.306	19.0739	16.8549	38.2392	117.068	44.5278	19.2285	24.818	37.4697
K00234	SDHA; succinate dehydrogenase (ubiquinone) flavoprotein subunit	8.16411e-09	3.19141e-09	7.37146e-10	8.83968e-09	2.76213e-09	3.7447e-09	8.04096e-09	9.69911e-09	6.01598e-09	3.31456e-09	2.30813e-08	2.39408e-08	1.90357e-09	8.90125e-09	2.76213e-09	5.27883e-09	7.12083e-09	3.19141e-09	2.27128e-09	4.60413e-09	9.82572e-10	9.82572e-10	2.2097e-09	8.59426e-10	8.04183e-09	6.32298e-09	6.50683e-09	4.66483e-09	1.24612e-08	1.06201e-08	2.02585e-09	2.08742e-09	4.3587e-09	2.33285e-09	6.8147e-09	1.10485e-09	5.34041e-09	3.31456e-09	2.70142e-09	6.62998e-09	3.99013e-08	5.83213e-09	1.96428e-09	1.842e-09	7.85798e-09
K00235	SDHB; succinate dehydrogenase (ubiquinone) iron-sulfur subunit	6.68955e-14	2.61499e-14	6.04007e-15	7.2431e-14	2.26325e-14	3.06835e-14	6.58865e-14	7.94731e-14	4.9294e-14	2.7159e-14	1.89125e-13	1.96167e-13	1.55976e-14	7.29356e-14	2.26325e-14	4.3254e-14	5.8347e-14	2.61499e-14	1.86105e-14	3.77255e-14	8.05105e-15	8.05105e-15	1.8106e-14	7.04201e-15	6.58936e-14	5.18096e-14	5.3316e-14	3.8223e-14	1.02106e-13	8.70196e-14	1.65995e-14	1.7104e-14	3.57146e-14	1.9115e-14	5.58386e-14	9.05299e-15	4.37585e-14	2.7159e-14	2.21351e-14	5.43251e-14	3.26945e-13	4.77876e-14	1.6095e-14	1.50931e-14	6.43871e-14
K00239	sdhA; succinate dehydrogenase / fumarate reductase, flavoprotein subunit	12026.7	12807	9145.17	10714	9061.44	8409.96	10234.6	11319	13783.7	10275.3	11212.9	7693	12032.2	10581.6	11496.2	11306.1	9742.57	8723.98	10955.7	7933.8	10135.9	10671.3	10630.7	9445.3	10403.7	9936.45	8710.48	11201.6	10604	11260.8	8822.17	12015.2	7943.07	8861.63	8874.36	6975.44	9443.37	10666.8	6535.14	9166.48	9010.29	9494.17	11626.9	10448.4	12159.3
K00240	sdhB; succinate dehydrogenase / fumarate reductase, iron-sulfur subunit	11107.1	11217.3	7833.52	9693.41	7947.02	7558.69	9146.82	10074.8	12460.2	9246.87	10148.6	5989.1	11099.6	9546.18	10391.3	10010	7904.6	7756.23	9839.02	7088.05	8779.42	9525.93	9170.59	8794.92	9419.65	8455.53	7501.22	10298.2	9326.2	10128.5	7245.16	10983.4	6528.62	8132.65	7764.74	6088.26	8202.72	9378.2	5714.22	8104.29	7616.07	8635.96	10658.1	9240.81	11300.5
K00241	sdhC; succinate dehydrogenase / fumarate reductase, cytochrome b subunit	9717.62	10078.3	6427.42	8298.01	6588.43	6271.43	7881.63	8369.56	10424.3	8026.07	8615.04	4107.26	9300.52	8408.78	8966.72	8511.17	5501.26	6637.02	8463.5	6030.75	7230.16	8116.25	7605.47	7432.61	8140.73	7146.92	6141.73	8699.74	7825.28	8954.67	5374.75	9475.53	5091.08	7068.85	6291.86	4942.54	7020.68	7983.22	4702.34	6778.46	6757.09	7535.79	9422.92	7960.59	10462.6
K00242	sdhD; succinate dehydrogenase / fumarate reductase, membrane anchor subunit	62.9398	42.8575	74.9619	60.7244	31.9096	51.7074	73.7071	95.8932	154.109	70.6039	76.6953	129.889	168.415	90.8819	81.2755	61.5371	46.8978	77.4532	58.2729	55.8823	52.5238	134.914	55.8695	81.4116	73.9667	63.4135	67.6199	108.792	100.195	173.724	59.1344	84.7093	42.5705	75.137	148.871	64.9762	90.2589	81.914	33.8506	48.5965	204.706	127.639	100.707	51.0852	94.3884
K00243	Unclassified	13668	14663.1	9814.93	11745.8	10366.8	10581.7	10732.5	13084	16175.5	10975.9	12694.1	9484.65	13656	11935	13253.3	13229.8	12457.7	8764.33	12158.4	9774.23	11901.6	11065.7	12325.5	11148.1	11217.5	10003.5	10940.8	12261.2	12475.1	11333.6	11041.6	14288.6	9781.66	11331.8	9848.11	8645.97	10047.8	12276.5	7420.75	11073.4	7902.49	10201.3	12934.6	11642.5	13904.6
K00244	frdA; fumarate reductase flavoprotein subunit	10475.6	7217.64	8156.92	7050.07	8445.14	9061.64	7772	9332.42	16771.7	7713.47	9074.51	13401.5	9275.79	8808.24	9042.6	10621.9	15859.4	8925.07	8027.32	8468.2	13081	8569.31	11659.5	7322.36	7053.66	9644.31	11892.1	9587.89	15736.3	10037.1	12111	9046.3	10708	14396.6	8528.36	9405.44	9462.71	9275.16	8860.6	14172.6	9237.07	7540.03	9113.58	9566.89	9278.35
K00245	frdB; fumarate reductase iron-sulfur subunit	309.779	376.179	320.633	290.697	206.077	328.715	342.213	316.024	411.433	212.553	312.013	307.266	294.401	415.59	341.829	356.579	381.054	558.383	298.259	119.509	336.082	339.401	339.754	314.934	244.325	360.934	290.55	395.413	302.91	427.829	384.861	350.028	136.002	327.471	346.885	258.756	463.754	305.85	167.558	305.955	575.288	371.137	372.585	232.36	240.065
K00246	frdC; fumarate reductase subunit C	235.15	333.341	255.646	232.044	150.135	287.931	282.09	249.242	338.699	174.764	226.314	170.466	240.582	358.648	295.606	281.867	166.369	510.828	240.757	82.5549	261.25	284.244	291.118	278.816	181.904	282.028	199.574	316.212	176.46	349.851	277.552	296.779	71.0172	283.054	267.936	205.353	404.872	240.027	133.57	237.393	435.151	307.635	327.313	145.963	202.394
K00247	frdD; fumarate reductase subunit D	3.89362	21.0189	0.0104936	5.0552	9.46722	24.0285	9.04564	9.27176	0.463938	20.0244	4.13509	0.218912	2.89366	0.0543969	40.3563	23.0423	1.5342	12.0368	32.5187	2.99913	28.2717	0.833456	0.0180392	11.2355	5.61927	0.0413874	0.0514188	3.58837	0.345746	3.75484	16.04	26.4348	6.03815	21.6031	60.2996	18.0232	11.0318	16.0275	0.0226858	0.056546	8.67964	0.0374418	0.0110618	0.0247561	23.3906
K00248	ACADS; butyryl-CoA dehydrogenase	7004.12	9103.2	7982.41	7100.65	6762.16	6370.08	6466.53	8604.44	9652.49	6859.49	8399.46	14659.8	7151.71	7831.33	7868.37	10005.2	13118.1	8940.08	7591.61	7399.43	8827.06	8824.06	8757.83	6073.65	7205.03	9705.71	11232.6	9482.93	10857.5	10170.1	12807.4	6741.79	11015.5	6995.43	8452.79	8239.81	9931.71	6216.22	6331.06	8831.12	9931.62	7133.27	7734.56	7965.13	6535.2
K00249	ACADM; acyl-CoA dehydrogenase	803.217	813.952	797.678	532.169	470.648	439.054	571.626	720.638	1000.61	505.205	881.696	933.797	345.492	681.453	788.679	697.242	572.783	507.994	700.299	464.363	556.688	766.08	544.381	317.252	608.329	673.07	555.075	516.837	721.546	608.012	584.659	518.682	441.898	399.794	580.913	404.161	719.344	600.875	316.58	580.465	1093	749.305	679.435	590.99	583.061
K00252	GCDH; glutaryl-CoA dehydrogenase	1015.32	465.901	640.125	548.493	310.844	439.913	412.125	357.272	965.561	548.494	547.475	418.835	543.445	730.078	784.241	367.62	296.838	392.9	511.946	448.413	349.215	1082.79	521.685	307.492	630.543	773.048	440.272	498.367	663.806	505.767	355.964	353.39	294.801	392.208	661.625	289.726	714.457	475.072	300.622	700.127	852.995	753.716	795.754	680.27	707.212
K00253	IVD; isovaleryl-CoA dehydrogenase	19.5717	6.5012	8.49427	7.94381	12.9939	13.8755	7.1679	12.4718	17.5231	14.5712	18.6893	42.6554	14.3037	10.3186	11.419	14.15	13.8813	19.4631	5.87811	12.551	8.55067	13.1734	6.31296	9.43607	16.0639	9.44368	14.6245	9.99434	18.2252	21.9038	18.9988	19.3096	8.11524	3.59418	22.1737	7.34067	11.2037	6.69065	5.74436	12.6929	64.2111	20.2764	3.08754	5.96001	5.9354
K00254	DHODH; dihydroorotate dehydrogenase	3542	3934.75	2449.14	2671.4	3415.87	2758.86	3299.98	3256.95	4583.92	2985.36	2860.63	1705.52	3034.23	3248.72	3442.94	3474.04	1503.92	4158.32	3913.56	2234.88	3367.19	3181.66	2632.7	4159.16	2614.83	3164.32	2485.62	3528.12	2757.79	4246.94	1959.65	3985.63	1718.93	4145.19	2129.74	1911.9	2213.69	3416.21	1877.96	2852.6	3870.41	2931.33	4216.51	2847.7	3458.55
K00255	ACADL; long-chain-acyl-CoA dehydrogenase	8.35353	17.1676	3.92484	3.66283	10.8028	4.60635	6.5579	5.9955	4.44781	5.61671	9.66995	9.84287	4.21156	4.24186	5.03977	12.9224	6.34422	2.88996	4.99191	5.88653	7.22184	10.1171	4.95253	3.42858	5.69962	4.53621	6.59407	1.55792	6.75416	11.7456	5.71111	5.93057	6.28345	5.57218	5.91811	6.09728	11.1116	4.08676	2.98014	7.83604	4.72167	8.36257	5.07624	1.74395	5.62164
K00256	Unclassified	11.6332	2.83443	1.61487	8.62905	2.14402	2.89553	9.95563	7.5164	8.27491	3.07072	19.9417	23.9151	4.03018	10.7544	2.13577	9.03502	5.52615	17.4564	5.94983	3.61036	4.21927	6.74771	1.73133	4.25422	10.4626	9.33198	6.52653	8.84034	12.5884	19.5428	1.76109	1.64754	3.37029	1.80384	11.146	3.54611	4.12938	3.77808	18.4113	10.0187	49.1652	21.5227	1.5333	2.76927	6.07604
K00257	acyl-ACP dehydrogenase	8398.93	8539.11	5407.39	7311.41	5649.25	4900.76	6484.02	7528.77	8933.1	6941.53	7762.34	4396.83	7927.86	7241.39	7391.22	7407.16	5378.12	5173.71	6734.28	5185.35	6069.8	6435.06	6880.91	5830.45	7395.39	5889.99	5066.54	7589.67	6469.14	6615.86	4991.66	7257.06	5062.63	5566.81	5425.52	4112	6261.22	6427.86	3818.97	5580.68	5776.98	6452.45	7395.53	6359.69	8350.71
K00259	ald; alanine dehydrogenase	6719.48	7737.86	5279.27	5915.63	4913.96	4857	5064.43	5780.56	7158.87	5665.91	6794.55	5739.43	7496.79	6395.87	6438.87	6353.7	7623.03	4363.76	5108.93	5095.8	5348.02	6346.83	6748.19	4291.96	6216.91	5654.71	5400.47	6515.02	6547.41	5765.21	5808.01	6678.93	5261.69	4129.77	5542.99	4589.31	6322.53	5183.73	3878.04	5623.53	5227.99	5923.26	5959.48	5759.66	7536.03
K00260	gudB; glutamate dehydrogenase	663.876	1739.66	1208.18	889.304	1051.16	803.149	1173.29	1459.02	1499.18	879.367	1101.02	1290.74	701.522	1049.3	1344.54	1403.3	1382.96	1050.72	1199.26	777.533	1330.21	949.182	1288.92	672.461	767.296	978.222	1130.08	786.971	1013.51	968.803	1605.27	953.69	1189.12	832.609	732.494	923.397	976.762	979.265	580.367	877.772	1005.57	911.374	872.524	1110.44	1145.33
K00261	GLUD1_2; glutamate dehydrogenase (NAD(P)+)	818.759	1325.64	957.88	958.125	878.941	779.921	961.895	1188.33	1288.58	836.295	1231.13	1579.14	909.004	1026.61	1153.46	1211.61	1527.38	1174.61	950.096	807.322	1070.7	1223.68	1025.16	695.208	887.16	1157.29	1204.94	924.408	1284.14	1328.39	1496.03	832.292	1192.29	828.142	945.436	942.844	1089.41	877.694	722.617	1099.37	1807.06	1123.07	906.899	1012.9	1129.84
K00262	E1.4.1.4; glutamate dehydrogenase (NADP+)	26708.6	28433.4	21505	23802.1	21690.4	19221.4	21812.5	25422.4	31920.8	22450.9	26189.5	23150.9	26818.4	24987.8	26457.6	27611.7	26141.2	20548.9	24633.3	20183.1	24573	23294.2	24152.2	22616.7	23075.4	23076.7	24148.5	26474.3	27004.4	26177.8	25569.3	26983.6	21759.7	20987.7	22425.7	18375.1	23746.1	23452.1	16018.5	22220.4	19406	21214.3	26492.7	23968.4	26688.3		NTE family protein
K00263	E1.4.1.9; leucine dehydrogenase	217.797	200.157	154.888	169.262	144.762	154.063	160.412	130.256	247.536	177.957	147.359	210.754	245.171	223.53	222.093	177.127	236.571	191.163	160.635	137.906	174.572	264.88	205.712	153.392	168.462	195.885	162.842	138.123	204.036	177.273	222.249	149.484	134.337	133.864	202.121	151.845	180.6	154.633	117.71	219.852	356.791	187.598	154.325	220.158	187.934
K00264	GLT1; glutamate synthase (NADH)	35.2866	61.7325	44.7007	54.4664	44.9547	37.7195	30.5135	56.393	42.6608	37.1563	44.7361	79.6379	38.0729	34.5497	42.1913	60.2001	62.4426	64.4853	39.4393	42.7757	35.8933	45.5029	47.9167	36.404	46.1011	40.6989	72.9156	40.3477	44.4984	61.1257	81.0661	47.5466	58.4464	37.4053	45.8304	57.0992	58.022	40.4404	42.3532	51.2851	52.0168	46.7994	48.44	45.4196	22.5156
K00265	gltB; glutamate synthase (NADPH) large chain	6395.65	7046.32	4507.26	5941.45	4830.36	4437.46	5508.86	6063.31	7306.92	5554.21	5969.99	2978.15	6650.37	6003.99	6286.02	6107.5	4360.25	5274.44	5927.88	4051.24	5160.13	5255.1	5588.71	5679.23	5713.38	4818.96	4214.21	6388.83	5211.44	6630.56	4060.96	7241.36	3619.05	4902.15	4193.77	3561.16	4851.4	5647.4	3201.59	4637.23	5112.4	5273.54	6231.33	5444.15	6791.92
K00266	gltD; glutamate synthase (NADPH) small chain	30710.1	36091.1	27724.7	29804.4	27385.7	24282.2	28134.2	32872.2	40352.6	27994.8	32841	32099.9	33997.3	29335.1	33010.1	35070.7	36224.8	26538.5	30313.8	25281.8	31302.6	29191.5	31768.3	27594.6	27845.9	29419.9	30547.2	32778.8	32872.8	32180.6	33381.7	33122.1	28653.8	25614.4	29230.9	24564.1	30034.2	28729.1	20455.7	28697.9	24527.3	26206.7	31465.6	29977.3	31679.9
K00270	pdh; phenylalanine dehydrogenase	1.2848	1.0774	0.929903	0.25167	0.600886	0.600867	0.692099	0.498479	0.643006	0.966168	0.969655	3.54915	1.03733	0.759239	1.09778	1.2734	2.42188	0.665151	0.530107	1.06083	1.54183	0.808598	0.829174	0.711815	0.555293	1.3568	1.83307	0.801602	2.90078	2.25511	2.0481	0.71458	1.08918	0.680336	1.25433	1.14424	1.83195	0.603739	0.927367	1.47572	1.68942	0.963035	0.667714	1.05851	0.687902
K00271	vdh; valine dehydrogenase (NAD+)	20.7011	7.54035	2.62084	19.5307	7.47853	10.4547	16.9967	22.0662	14.4121	8.76314	49.7215	64.8353	5.42273	19.4669	8.15133	13.808	18.8884	12.2825	6.02704	11.7214	4.46897	3.53423	5.59649	2.61199	18.7872	14.8691	16.1934	10.8204	30.2235	23.308	10.9834	5.69239	11.4709	6.58335	18.5563	5.84933	12.1178	8.47412	6.94839	17.1995	87.9802	13.0581	4.13715	6.30215	17.612
K00272	DDO; D-aspartate oxidase	1.29716e-18	5.07069e-19	1.17122e-19	1.4045e-18	4.38863e-19	5.9498e-19	1.27759e-18	1.54105e-18	9.55853e-19	5.26636e-19	3.6673e-18	3.80385e-18	3.0245e-19	1.41428e-18	4.38863e-19	8.38731e-19	1.1314e-18	5.07069e-19	3.60874e-19	7.3153e-19	1.56117e-19	1.56117e-19	3.5109e-19	1.3655e-19	1.27773e-18	1.00463e-18	1.03384e-18	7.41176e-19	1.97991e-18	1.68738e-18	3.21879e-19	3.31662e-19	6.92535e-19	3.70657e-19	1.08276e-18	1.75545e-19	8.48514e-19	5.26636e-19	4.29218e-19	1.05341e-18	6.33974e-18	9.26642e-19	3.12096e-19	2.92667e-19	1.24852e-18
K00273	DAO; D-amino-acid oxidase	20.2038	7.32994	2.76043	21.9403	7.75855	9.87964	17.698	22.6548	18.5893	10.4862	53.4613	75.9165	6.1167	20.9582	8.41561	18.0169	20.4138	12.9068	6.44364	14.2007	4.86791	7.94014	9.60485	2.86286	21.5353	16.9831	23.7561	11.2798	38.0163	33.9197	16.3074	5.28308	12.0192	6.90414	20.1007	5.71239	12.6895	9.96666	9.29041	18.9191	103.119	20.8266	5.23216	6.70743	21.3092
K00274	MAO; monoamine oxidase	933.962	654.465	663.239	820.105	628.629	599.793	545.409	1104.02	1152.77	891.244	1125.68	1445.21	606.345	829.922	822.487	828.838	1362.82	810.961	507.335	660.966	727.526	804.842	841.321	648.031	869.52	754.204	906.904	774.548	1228.63	1105.83	1080.09	372.026	1305.92	698.458	816.542	712.749	925.133	466.021	520.276	871.202	1294.13	773.373	579.713	685.441	822.184
K00275	pdxH; pyridoxamine 5'-phosphate oxidase	2914.72	3381.76	1915.24	2581.55	1728.77	1459.69	2095.35	2215.39	2766.43	2538.01	2808.12	980.758	3608.77	2866.58	2313.77	2554.7	2377.85	1987.6	1611.59	1821.28	1860.51	2582.81	2814.08	1493.53	2962.59	1735.66	1492.22	2487.32	2086.18	2934.87	1781.88	2399.26	1713.78	958.641	1594.38	1410.92	2283.16	1636.1	1212.81	1797.82	2462.89	2435.48	2192.89	1986.05	3388.46
K00276	AOC3; primary-amine oxidase	10.844	6.07359	5.34532	7.42313	5.02638	6.01016	6.458	8.08181	7.85925	7.02491	16.4798	47.2351	6.7782	8.32935	8.16958	12.894	19.3615	8.35804	4.65031	9.63757	10.3788	5.63539	5.77159	3.90092	8.53491	10.5539	14.2351	6.48951	25.2233	14.9586	17.1457	4.20067	9.77855	5.86597	10.6694	9.43523	9.5916	5.88929	7.33495	14.4314	26.7727	7.98189	3.16568	8.69255	7.82194
K00278	nadB; L-aspartate oxidase	13890.6	15440.4	11181.8	13131	11280.1	10555.7	11390	14182.2	17046.6	12280.8	14539.1	12384.3	15015.4	12541.5	13821.4	14788.9	15139.6	11072.2	12273.8	10595.3	12715.9	12371.3	13561.6	12350.4	12723.7	11498.5	12261.2	14015.2	13191.4	13846.9	13234.2	14790.6	11671.1	10675.5	12338	9836.65	12469.9	12149.3	8673.04	11797.4	11086.4	11260.3	13915.6	12323.7	13903
K00279	CKX; cytokinin dehydrogenase	0.0294567	0.0366451	0.0257479	0.00873586	0.0162505	0.0245162	0.0239673	0.0172492	0.0218751	0.0265061	0.028176	0.121548	0.0301901	0.0214854	0.0471449	0.0324562	0.0829294	0.0162074	0.0182129	0.036111	0.0525049	0.0137865	0.0282188	0.0143875	0.0192097	0.0369085	0.0579804	0.0221506	0.0952335	0.0220486	0.0701158	0.0159783	0.0374095	0.0166948	0.0388664	0.0391716	0.0502782	0.0171424	0.0318143	0.0507129	0.0562967	0.0157842	0.0156433	0.0371963	0.023817
K00280	Unclassified	0.0437316	0.00356968	0.0241192	0.0206049	0.0244462	0.0281463	0.00137466	0.027667	0.0393134	0.0218268	0.0194102	0.319781	0.0225974	0.0162367	0.0355633	0.0476755	0.0878397	0.0714957	0.0224729	0.0457022	0.0541753	0.027473	0.021278	0.0181047	0.0417583	0.0219793	0.0561901	0.0224729	0.0898081	0.021223	0.108766	0.0124865	0.0517167	0.0377032	0.0427034	0.0646131	0.00658544	0.0337094	0.0284181	0.0730507	0.0218555	0.0174866	3.63431e-08	25.5347	0.0239669
K00281	GLDC; glycine dehydrogenase	7429.7	7675.74	4892.57	6245.47	4948.37	4196.23	5602.74	6306.92	7598.86	5880.09	6189.27	2792.12	7063.95	6242.26	6271.17	6391.77	4330.79	4910.52	5837.23	4399.79	5066.53	5921.17	5701.83	5203.23	6402.81	5212.5	4212.01	6510.36	5015.26	6265.03	4044.38	6595.3	3767.74	4957.37	4552.74	3334.53	5391.24	5632.14	3135.52	4777.85	5120.56	5684.53	6708.98	5705.86	7430
K00282	gcvPA; glycine dehydrogenase subunit 1	3336.89	3832.35	2928.79	3107.98	2650.03	3124.75	3003.97	3654.16	3911.76	2987.52	4264.21	5517.96	3240.99	3438.61	3730.47	4004.44	4488.37	3711.58	3328.79	2972.32	3201.28	3441.82	3418.2	2849.45	3100.19	4033.62	4297.15	3662.73	4684.22	4291.55	4444.96	3349.13	3818.46	2929.22	3290.4	3383.06	4059.08	3008.66	2726.99	3724.53	4064.93	3159.75	3350.8	3326.54	2874.39
K00283	gcvPB; glycine dehydrogenase subunit 2	3591.05	3984.5	3073.74	3258.68	2807.92	3269.87	3156.51	3956.59	4181.03	3166.49	4494.92	5802.46	3343.84	3699.98	3935.96	4211.85	4749.97	3894.35	3443.14	3117.72	3398.86	3569.5	3644.07	2969.86	3248.91	4179.74	4497.96	3826.05	4934.45	4493.4	4697.82	3412.12	4131.55	3036.1	3600.67	3526.26	4273.54	3106.41	2894.85	3815.84	4337.39	3266.55	3460.03	3407.57	3012.95
K00284	GLU; glutamate synthase (ferredoxin)	4130.2	6219.46	5009.56	4333.11	4628.44	4146.66	4343.86	5815.67	6517.51	3998.43	5118.36	7043.05	4593.5	4785.04	5558.06	5844.36	6668.88	5272.15	4872.2	4027.22	5539.64	5002.41	5145.82	3762.66	4171.05	5093.59	5640.63	4635.53	5382.97	5900.14	6691.58	4965.82	5553.35	4026.6	5139.08	4462.49	5036.31	4640.26	3563.15	4607.22	5068.83	4060.62	4534.32	4895.7	4243.45
K00285	dadA; D-amino-acid dehydrogenase	189.562	177.3	107.521	156.262	121.778	131.047	138.774	100.014	210.575	165.389	112.227	155.641	215.928	195.181	190.92	139.551	73.7005	185.676	122.499	117.062	104.438	259.794	191.99	143.502	173.448	118.326	101.796	119.363	113.457	164.854	112.913	139.379	66.1464	113.562	237.805	97.7086	137.477	113.368	65.7502	176.697	307.03	174.664	162.045	163.598	191.886
K00286	proC; pyrroline-5-carboxylate reductase	18379.8	21348	16248.8	17320.7	16591.2	15681.4	16338.9	19468.2	24466.7	16126.5	19390.1	21412.8	19566.6	17946	19883.2	21198.8	23915.4	17298	18237.8	15512.8	19276.4	17324	18783.4	17446.6	16223.7	18205.5	19540.3	19831.3	21563.8	20708.4	21138.5	20006.4	17642.7	16580	17408.9	15525	17698.4	17536.3	12502.1	17650.8	17369.8	15725.4	19229.9	17959.3	19003.3
K00287	DHFR; dihydrofolate reductase	17620.3	18489.8	13662.6	15405.6	13561.1	14053.3	13087.6	16596.2	21707.2	14045.8	17371.6	15193.5	17705.9	15720.8	17192	17997.3	17977.7	13821.9	15431.5	13470.3	15972.9	15585.6	16171.5	15126.5	14672.4	14132.4	16413.3	16800.4	17662.4	18121.2	16523.5	18681	14397.1	15151.6	15751.3	12563	15249.9	15792.1	11000	15626.9	14170.1	13717.8	17985.1	15614.1	16986.3
K00288	MTHFD; methylenetetrahydrofolate dehydrogenase (NADP+) / methenyltetrahydrofolate cyclohydrolase / formyltetrahydrofolate synthetase	3.10899	1.45648	0.555066	3.26193	1.22118	1.42404	3.18247	3.59719	2.27421	1.57157	8.62127	9.61565	0.732604	3.28465	1.07351	2.63571	3.00711	1.39557	0.977777	2.11165	0.69506	1.09293	1.18114	0.317137	3.47968	2.44059	3.01446	1.72137	6.51142	4.73198	1.54429	0.77028	1.87518	0.921067	3.41845	0.648792	2.45433	1.488	1.47248	2.44653	18.0382	4.04953	0.930751	0.770105	2.95989
K00289	ALDH1L; formyltetrahydrofolate dehydrogenase	941.23	925.071	372.397	746.75	443.394	239.064	398.427	519.143	609.48	747.552	764.109	103.751	1018.16	571.215	478.512	729.405	921.898	125.057	226.437	549.915	463.921	474.959	761.751	326.242	827.231	207.897	204.743	648.927	467.468	295.872	428.021	641.052	429.997	0.00327754	311.645	388.177	525.063	326.638	125.459	335.715	82.8467	583.051	501.397	480.882	1082.46
K00290	LYS1; saccharopine dehydrogenase (NAD+, L-lysine forming)	12748.9	14100.8	10324.8	12152.3	10914.7	9726.02	11761	13621.4	15932.8	11631.9	13372.9	10992.7	13471.2	12168.1	13388	13923.1	12610.6	10726.3	12809	9817.66	12255.2	11174.3	12473.2	11514.5	11516.2	10944	11385.5	13140.1	12685.3	12515.1	12298.7	13279.2	10964.8	10591.8	10729.8	9131.24	11182.3	11659.7	8103.34	11059.4	9918.41	10733.2	12643.1	11685.2	13230.1
K00293	LYS9; saccharopine dehydrogenase (NADP+, L-glutamate forming)	34.816	55.8283	14.2983	32.2371	16.1152	46.7992	43.1976	22.3992	24.8931	29.0761	87.6067	29.4811	31.4938	106.303	56.6482	38.9031	8.47979	99.434	28.1025	7.82201	18.984	57.0462	29.3068	34.198	38.8239	200.247	67.346	37.1495	77.8823	113.185	18.9218	20.0598	11.5917	4.89134	31.8958	22.1618	50.2943	18.4175	49.2115	32.4374	189.228	82.8508	24.6347	47.895	18.9569
K00294	E1.2.1.88; 1-pyrroline-5-carboxylate dehydrogenase	1597.6	1897.47	1260.39	1337.04	1161.19	1195.43	1385.23	1320.12	1724.7	1302.92	1492.6	1497.09	1583.19	1616.56	1628.91	1445.05	1349.76	1235.33	1448.77	1029.29	1199.22	1880.97	1554.61	952.679	1503.08	1721.44	1451.17	1499.66	1534.58	1555.31	1146.37	1302.09	1087.65	1121.8	1450.21	951.804	1592.06	1309.18	970.556	1470.68	1779.18	1370.22	1668.43	1542.97	1385.9
K00295	MTD1; methylenetetrahydrofolate dehydrogenase (NAD+)	0.0936647	0.0700864	0.0310301	0.0155701	0.076439	0.0413292	0.038986	0.031996	0.0552404	0.0559848	0.0753884	0.116792	0.0281757	0.0156785	0.0495091	0.108449	0.324772	0.0452636	0.00575024	0.0400865	0.0215518	0.0113538	0.0446765	0.00151378	0.0334292	0.0359599	0.13539	0.00821656	0.0830672	0.0338725	0.0392663	0.00367675	0.0622318	0.0536619	0.073296	0.0862323	0.128333	0.0107926	0.0500894	0.0116779	0.128211	0.0355798	0.00731107	0.0776201	0.0633938
K00296	nos; D-nopaline dehydrogenase	3.73731e-13	1.70821e-21	3.9456e-22	4.73147e-21	1.47844e-21	2.00437e-21	4.30396e-21	2.33327e-13	4.66655e-13	1.77413e-21	1.23544e-20	1.28144e-20	2.33327e-13	4.76443e-21	1.47844e-21	2.82552e-21	2.80128e-13	1.70821e-21	1.21571e-21	3.2693e-13	2.80128e-13	2.80128e-13	1.18275e-21	4.60011e-22	4.30442e-21	3.3844e-21	3.48281e-21	2.49687e-21	2.80128e-13	5.68445e-21	1.08434e-21	4.66655e-13	2.33301e-21	1.24867e-21	3.64759e-21	5.91376e-22	2.85847e-21	1.77413e-21	1.44595e-21	3.54872e-21	2.13573e-20	3.12167e-21	1.05139e-21	9.85936e-22	4.20601e-21
K00297	metF; methylenetetrahydrofolate reductase (NADH)	14856.8	17329	12398.7	14109.2	12537.2	12056.2	13132.5	15808.9	18827.3	12713.3	15257.5	14242.2	15810.1	13632	15501.6	16237.4	16299.4	12931.9	14411.4	11512	14046.1	13418.4	14478.4	13739.1	13032.2	13233.1	13691.5	15050	14417.8	15590.3	14847.4	16366	12392	12405.3	13601.8	10755.4	13378	13987	9182.37	12875.8	12882.4	12178.4	15300.6	13814.8	14927.8
K00298	Unclassified	112.367	124.95	104.675	74.3896	90.2574	137.178	112.332	88.6649	171.557	93.425	103.852	221.162	185.613	115.877	121.404	144.545	186.824	121.497	106.121	111.147	110.812	122.117	120.488	76.303	84.4495	115.037	152.418	126.737	161.565	138.642	124.485	118.414	114.937	106.662	172.682	99.757	128.859	124.312	87.1145	119.336	79.4502	90.8992	78.1316	135.592	84.5466
K00299	ssuE; FMN reductase	196.72	197.667	63.322	108.203	272.785	51.561	159.205	116.282	971.441	191.01	407.892	599.117	174.815	433.226	327.825	212.931	349.42	104.806	225.037	480.888	407.978	59.0838	256.207	132.459	120.307	234.784	280.408	120.727	1019.97	448.886	141.708	98.6249	159.739	448.33	219.535	338.148	69.82	226.139	86.3278	187.848	461.687	115.668	46.5955	227.546	618.159
K00301	E1.5.3.1; sarcosine oxidase	49.8801	19.5708	6.92059	50.6721	19.3139	23.2507	45.9686	56.0357	37.5326	26.3307	129.892	164.594	15.106	53.5021	19.3603	42.8077	48.8442	24.0764	15.1576	31.5473	11.895	11.195	15.1459	7.95405	50.345	38.7584	45.6428	30.0057	80.7105	65.0634	21.6041	18.8641	29.3791	15.8451	43.4666	12.1213	33.081	21.4054	20.5824	46.7579	232.205	41.8774	11.825	15.7771	45.7932
K00302	soxA; sarcosine oxidase, subunit alpha	477.307	594.285	450.226	537.704	458.525	503.601	485.692	479.307	575.207	499.27	485.854	743.084	555.105	572.941	503.43	578.542	718.88	670.157	515.358	445.424	501.467	650.023	583.622	421.734	564.475	813.009	613.554	573.053	819.4	834.368	771.489	375.49	639.086	376.301	539.186	434.388	705.709	497.778	417.236	568.393	895.23	539.629	453.51	456.342	481.103
K00303	soxB; sarcosine oxidase, subunit beta	640.839	803.762	518.197	712.295	542.333	623.848	642.378	657.316	727.159	603.115	726.55	1052.31	653.921	708.285	674.235	719.615	799.932	797.985	628.169	561.407	506.694	735.715	700.913	485.156	738.446	915.63	748.798	709.366	1038.78	1006.4	757.05	685.218	566.478	488.69	673.038	562.276	827.902	593.672	462.211	696.038	1101.09	768.623	531.584	607.345	625.284
K00304	soxD; sarcosine oxidase, subunit delta	17.5143	5.80847	3.33302	3.89475	9.19934	12.1426	3.14729	8.87171	10.506	12.646	12.1415	31.0366	9.34873	8.17106	6.07507	11.3644	7.32474	19.1412	3.07854	6.83054	4.69895	10.0638	3.66287	5.51422	8.8835	6.88163	9.34283	4.51955	9.96228	6.53437	18.3191	22.1635	4.29536	1.76266	20.9409	6.39009	6.68508	3.30395	2.41148	12.7241	45.3498	16.3689	0.763351	1.95944	3.59089
K00305	soxG; sarcosine oxidase, subunit gamma	7.59456	1.79979	3.1287	1.44458	5.48024	4.85647	0.918511	4.08466	8.54393	11.7273	4.5712	23.228	6.59119	5.70383	5.29499	7.1665	5.13043	6.93292	1.27628	5.21676	4.24978	8.44188	3.05039	5.16648	6.4137	2.39429	7.53928	3.05157	6.33147	3.43743	8.7746	17.7769	3.08722	1.11604	8.11765	2.95976	2.47008	2.38523	1.66271	10.8864	19.8158	14.7523	0.218897	1.44887	1.41283
K00306	PIPOX; sarcosine oxidase / L-pipecolate oxidase	8.18397	2.95444	0.801018	8.40311	2.68675	3.47814	7.88755	8.99886	6.03817	3.376	21.6151	23.2329	2.08802	8.67286	2.5726	5.7989	6.64463	3.61321	2.70823	4.6869	1.36086	2.1391	2.3833	1.23336	8.14738	6.21847	6.22605	4.95294	12.2472	10.8744	2.51717	1.96103	4.05752	2.17646	7.66106	1.37529	4.94416	3.4951	4.77255	6.49125	41.2012	7.08299	2.02655	1.8914	7.28178
K00311	Unclassified	109.724	161.7	144.521	130.585	62.0985	128.857	132.527	132.052	273.143	180.428	82.8234	79.0848	289.911	178.728	194.787	121.632	40.4691	137.999	96.8663	133.82	136.384	236.849	174.896	186.045	159.98	80.1615	83.7987	166.067	106.277	175.869	115.55	189.898	106.315	137.338	157.508	127.69	148.411	150.246	93.4945	139.755	215.111	196.641	227.662	159.426	186.106
K00313	Unclassified	424.766	470.461	433.674	409.323	350.151	301.09	393.989	627.632	715.475	510.876	596.975	985.825	475.175	420.574	448.423	547.542	871.723	494.59	341.81	413.567	505.186	542.226	472.513	377.059	499.59	494.686	715.824	504.611	825.384	678.236	782.22	333.788	707.01	479.299	711.356	539.142	723.552	332.585	377.731	612.439	725.867	493.317	462.235	530.446	596.966
K00314	SARDH; sarcosine dehydrogenase	3.87485e-06	1.51471e-06	3.49864e-07	4.19549e-06	1.31096e-06	1.77731e-06	3.8164e-06	4.60339e-06	2.8553e-06	1.57315e-06	1.09549e-05	1.13628e-05	9.03472e-07	4.22471e-06	1.31096e-06	2.50544e-06	3.37969e-06	1.51471e-06	1.07799e-06	2.18521e-06	4.66348e-07	4.66348e-07	1.04877e-06	4.079e-07	3.81681e-06	3.00101e-06	3.08827e-06	2.21402e-06	5.91435e-06	5.04051e-06	9.61508e-07	9.90732e-07	2.06872e-06	1.10722e-06	3.23439e-06	5.24384e-07	2.53466e-06	1.57315e-06	1.28215e-06	3.14672e-06	1.89379e-05	2.76804e-06	9.32284e-07	8.74248e-07	3.72955e-06
K00315	DMGDH; dimethylglycine dehydrogenase	18.1445	6.45528	2.61814	2.81454	9.22392	13.3142	2.71092	7.86558	7.52926	16.9396	8.74639	42.3725	8.63371	9.29993	4.07728	15.0802	6.24243	22.7568	3.3973	5.71172	3.78956	7.4927	2.36527	3.71517	6.61819	7.00921	14.4611	3.83419	8.00238	5.79257	20.1795	28.4694	3.41185	1.7792	25.3428	7.45744	7.24368	2.79812	2.00282	14.579	40.8082	17.5681	0.747124	2.61654	2.60641
K00316	spdH; spermidine dehydrogenase	0.167217	0.0651656	0.00823315	0.09873	0.148465	0.189265	0.163448	0.257264	0.29073	0.55231	0.257795	0.739596	0.199553	0.0994178	0.15332	0.526552	0.169725	0.0939929	0.118916	0.552723	0.156425	1.62158	0.499913	0.142279	0.589943	0.222326	0.0726745	0.0963827	0.491912	1.06219	0.830128	0.748774	0.127972	0.0849334	0.924885	0.159781	0.618615	0.375553	0.496374	0.162449	3.7635	6.5619	0.304051	0.0942115	0.264033
K00317	dmd-tmd; dimethylamine/trimethylamine dehydrogenase	18.3747	7.13762	1.86386	19.0427	11.389	8.11379	17.5198	21.3422	13.8784	12.1088	49.8089	52.1423	7.77617	21.3565	6.02804	11.7856	17.31	7.10398	4.94291	13.7732	2.96501	2.84695	4.80702	4.53709	23.2366	13.7254	14.6124	14.335	28.8612	26.6302	4.60677	10.8146	9.6569	5.09392	14.9535	2.63028	11.9603	7.15045	5.99071	17.577	96.3198	17.0085	4.23062	4.07148	16.9869
K00318	PRODH; proline dehydrogenase	1282.26	1099.75	890.951	683.838	699.114	670.564	680.642	499.142	1217.93	754.25	838.336	519.37	856.299	1046.67	1068.32	668.443	383.539	574.621	857.437	680.426	553.844	1552.51	842.063	486.594	893.463	1235.67	679.042	888.225	862.525	869.066	458.378	711.75	425.457	619.387	853.933	435.588	1079	775.943	481.396	905.143	1154.4	1004.79	1198.12	999.085	928.543
K00319	mtd; methylenetetrahydromethanopterin dehydrogenase	33.433	65.1055	0.00850821	9.74934	81.6145	88.4128	30.1502	65.1258	0.0346248	40.4726	19.2788	0.118751	13.0552	5.28143	0.0201427	41.8101	3.97659	1.1507	0.454303	35.9649	3.89786	1.73885	45.6659	0.00382508	20.1127	13.0402	0.0507491	1.87258	0.267056	13.9132	57.3234	32.0593	36.939	0.0190952	10.1118	0.0197364	0.569251	0.135319	0.0189932	0.0295083	1.75025	0.519903	9.06874	24.2113	0.0436861
K00320	mer; 5,10-methylenetetrahydromethanopterin reductase	47.5406	71.0182	3.24424	22.557	86.8493	95.0796	42.0112	79.727	10.5156	46.4745	51.7363	48.7362	17.6346	18.4268	7.037	52.5975	19.93	10.3149	5.33279	44.9693	9.51693	6.9024	50.1743	2.17733	33.5988	24.388	13.8255	9.62578	26.9655	33.6783	66.4172	35.9525	46.3174	5.15467	22.8259	5.54275	10.8261	6.3884	5.88455	12.8664	59.213	10.0464	12.0201	29.814	12.1559
K00322	sthA; NAD(P) transhydrogenase	38.6483	33.5685	34.8846	13.4443	30.3402	7.12414	29.8225	47.1428	55.484	76.2793	24.0609	29.1477	11.0898	22.9282	10.9434	24.6652	22.2086	41.5409	7.05465	5.82679	12.6484	54.8445	50.039	9.64708	144.278	15.0456	3.37269	15.5246	33.824	44.0094	27.2986	16.3535	11.7831	9.91496	90.2358	15.8069	72.2086	45.2978	14.5178	16.9392	86.9406	113.595	12.2629	26.3714	18.836
K00323	NNT; H+-translocating NAD(P) transhydrogenase	5.63796e-05	3.92408e-05	3.84986e-05	2.76468e-05	4.78015e-05	4.6468e-05	4.80025e-05	4.31555e-05	6.008e-05	4.95465e-05	8.74563e-05	0.000177718	4.54195e-05	6.43354e-05	4.08034e-05	7.35419e-05	7.65614e-05	6.91399e-05	5.94593e-05	3.74018e-05	0.000107276	4.08304e-05	3.48363e-05	3.77717e-05	3.73836e-05	4.41777e-05	6.69961e-05	6.69612e-05	5.73188e-05	5.20086e-05	6.96588e-05	3.22037e-05	0.000156625	3.94613e-05	6.78254e-05	0.00017248	6.00952e-05	4.18801e-05	5.23206e-05	5.04192e-05	6.52602e-05	3.42511e-05	9.86853e-05	7.21946e-05	9.94174e-05
K00324	pntA; H+-translocating NAD(P) transhydrogenase subunit alpha	2620.87	1820.7	2462.14	1902.09	1348.73	1798.03	1675.03	1886.6	2876.36	1837.22	1941.41	1660.31	1617.74	2163.26	2344.08	2085.34	1850.87	1354.11	2139.06	1278.61	1823.89	2688.95	1855.76	1338.13	2164.12	2606.41	2072.7	2170.96	2548.48	2066.07	1969.52	1590.18	1655.44	1521.57	2421.62	947.273	2424.39	2172.79	1440.18	1827.37	2174.42	2302.68	2532.87	2634.19	1862.16
K00325	pntB; H+-translocating NAD(P) transhydrogenase subunit beta	1377.46	1063.76	1352.88	1028.19	676.5	987.162	939.185	1158.23	1564.49	1037.3	1048.01	922.449	957.952	1196.69	1250.01	1223.42	997.101	801.989	1157.57	701.828	1048.84	1421.29	1056.63	741.375	1196.21	1456.64	1194.74	1206.42	1424.33	1149.81	1085.12	891.354	1001.88	873.797	1344.59	498.512	1328.32	1176.54	921.599	1014.08	1171.65	1257.61	1341.22	1426.7	1052.7
K00326	E1.6.2.2; cytochrome-b5 reductase	0.0539069	0.0211205	0.00489959	0.0582448	0.0182989	0.0247236	0.0530176	0.0639289	0.0397033	0.0219035	0.152133	0.157845	0.0125782	0.0586506	2.42334	0.0349171	0.0473659	0.021085	0.0149655	0.0303722	0.00650254	0.00647419	0.0146095	0.00566277	0.053002	0.0416977	0.0430509	0.0307367	0.0821854	0.0699761	0.0133839	0.0137541	0.0287976	0.0154421	0.0449731	0.00740044	0.0353581	0.0218397	0.0178564	0.0436851	0.26291	0.038428	0.0129427	0.0122433	2.45693
K00327	Unclassified	0.404627	2.21176e-06	5.10869e-07	6.12622e-06	1.91425e-06	2.59521e-06	5.57267e-06	0.25262	0.50523	2.29711e-06	1.59962e-05	1.65918e-05	0.252614	6.16889e-06	1.91425e-06	3.65842e-06	0.303287	2.21176e-06	1.57408e-06	0.353955	0.303283	0.303283	1.5314e-06	5.95613e-07	5.57328e-06	4.38205e-06	4.50947e-06	3.2329e-06	0.303291	7.36011e-06	1.40399e-06	0.505227	3.02074e-06	1.61675e-06	4.72283e-06	7.65702e-07	3.70109e-06	2.29711e-06	1.87218e-06	4.59481e-06	2.7653e-05	4.04187e-06	1.36131e-06	1.27657e-06	5.44586e-06
K00329	Unclassified	0.0339355	1.29815e-06	2.99844e-07	3.59565e-06	1.12353e-06	1.52321e-06	3.27076e-06	0.0211885	0.0423715	1.34824e-06	9.38863e-06	9.73821e-06	0.0211853	3.6207e-06	1.12353e-06	2.14723e-06	0.0254366	1.29815e-06	9.23871e-07	0.0296848	0.0254341	0.0254341	8.98825e-07	3.49582e-07	3.27112e-06	2.57195e-06	2.64674e-06	1.89748e-06	0.0254388	4.31986e-06	8.24041e-07	0.0423699	1.77296e-06	9.48917e-07	2.77197e-06	4.49413e-07	2.17228e-06	1.34824e-06	1.09884e-06	2.69683e-06	1.62304e-05	2.37229e-06	7.98995e-07	7.49256e-07	3.19633e-06
K00330	nuoA; NADH-quinone oxidoreductase subunit A	9008.92	9588.14	6093.12	8101.3	6831.73	5763.17	7826.63	8156.21	10287.6	8032.7	8592.31	4608.94	9234.68	7887.72	8399.99	8727.73	5978.69	6772.77	8016.33	6120.25	7366.11	7338.13	7777.34	7454.11	7893.38	6464.75	5785.44	8400	7353.91	8166.72	5755.65	8869.96	5334.22	6821.22	6050.84	5232.08	6813.34	7617.4	4728.21	6730.96	6380.05	7326.63	8650.91	7483.53	9352.3
K00331	nuoB; NADH-quinone oxidoreductase subunit B	7841.98	8278.77	5065.16	6928.12	5361.01	4854.58	6456.73	6699.39	8306.14	6781.51	7231.36	3484.22	7853.17	6835.13	6992.66	7085.29	4668.72	5594.47	6495.34	5001.96	5791.39	6274.82	6510	5791.12	6955.7	5238.43	4628.85	6990.33	6091.23	7119.72	4603.08	7470.75	4288.5	5265.32	5112.47	4048.27	5823.68	6310.92	3903.34	5391.12	5676.54	6299.79	7216.83	6311.13	7977.99
K00332	nuoC; NADH-quinone oxidoreductase subunit C	507.558	699.68	401.721	434.727	338.602	411.089	486.972	445.629	632.097	487.798	605.363	668.646	595.423	574.627	531.977	467.329	371.699	1171.5	355.988	385.96	389.558	854.251	520.581	384.601	563.902	507.041	441.888	418.528	603.64	1621.58	430.831	441.635	285.971	355.9	539.33	371.402	618.715	430.092	482.092	488.636	2022.93	715.741	567.285	512.577	531.63
K00333	nuoD; NADH-quinone oxidoreductase subunit D	628.521	804.216	501.038	513.811	416.451	455.113	586.832	566.625	797.526	667.203	679.887	758.082	670.376	675.082	602.234	537.729	435.784	1296.16	389.795	425.635	441.699	1019.27	673.39	430.851	890.239	562.569	470.96	480.609	707.752	1722.56	504.328	492.856	329.369	404.333	630.955	426.806	797.614	550.65	526.009	560.565	2241.47	944.319	637.495	613.692	622.351
K00334	nuoE; NADH-quinone oxidoreductase subunit E	7391.82	9119.15	7744.04	7151.53	7308.88	6193.32	6601.39	9314.15	10628.6	7151.41	9169.19	12375.9	7839.41	7682.8	8319.99	9285.36	12200.5	8524.88	7386.55	7008.67	8690.13	8720.17	8296.73	6545.44	7440.41	8824.93	9546.43	8233.06	9974.73	10360.5	10737.2	7545.34	9923.28	6681.75	8510.3	7725.39	9398.03	6882.94	6180.69	8589.86	10447.2	6811.96	7377.92	7729.17	6796.69
K00335	nuoF; NADH-quinone oxidoreductase subunit F	5655.66	7106.4	6101.53	5570.17	5349.68	4966.98	4722.3	7295.62	7955.2	5473.86	6812.29	9417.27	5686.2	5993.09	6327.63	6814.24	8721.67	6416.3	5420.34	5152.93	6465.08	7075.88	6278.69	4737.15	5866.1	6124.82	7132.1	6028.42	7138.17	7916.48	8144.44	5753.7	7634.45	4900.27	6236.56	5607.65	7184.58	5337.32	4595.92	6231.53	8445.86	5172.38	5621	5656.74	5014.04
K00336	nuoG; NADH-quinone oxidoreductase subunit G	8442.16	10903.6	9678.39	8708.71	8851.04	7685.06	8213.73	11674.9	12906	8371.35	10730.9	14924.2	9413.1	9303.98	10022.4	11336.5	14645.6	9833.09	9111.49	8331.69	10812	10532.4	10046.2	7510.94	8247.65	9654.98	11480.1	9726.55	11336.8	11534.7	13808.3	9000.89	12016.4	7769.17	9961.4	9078.81	10770.7	8114.89	7262.3	9894.88	11479.4	8056.68	8880.55	8908.71	8029.64
K00337	nuoH; NADH-quinone oxidoreductase subunit H	8606.28	9161.14	5558.17	7571.01	6060.22	5592.72	7235.54	7369.69	9236.88	7345.43	7801.29	3892.87	8427.43	7590.47	7832.05	7895.34	4999.54	6342.76	7400.8	5465.98	6508.55	6869.29	7030.36	6782.01	7387.45	6040.55	5179.66	7814.23	6754.85	7788.75	5042.25	8369.01	4584.92	6140.8	5488.56	4466.25	6243.48	7081.46	4248.49	5960.68	6217.45	6875.2	8194.89	6880.74	8753.1
K00338	nuoI; NADH-quinone oxidoreductase subunit I	8500.91	8891.66	5443.32	7440.77	5988.49	5417.62	7065.55	7237.41	9120.96	7244.87	7693.21	3752.99	8357.67	7411.09	7659.19	7755.4	4900.75	6177.43	7305.96	5415.19	6425.96	6737.49	6881.45	6685.73	7215.87	5868.97	5087.29	7683.62	6617.71	7667.34	4904.65	8251.64	4549.96	6060.06	5393.91	4382.13	6037.56	6979.68	4173.67	5854.35	6008.84	6680.29	8032.91	6831.23	8623.25
K00339	nuoJ; NADH-quinone oxidoreductase subunit J	8542.84	8972.76	5506.62	7457.92	6039.06	5431.16	7109.09	7325.86	9210.11	7365.45	7729.53	3779.3	8370.89	7449.03	7670.02	7799.47	4933.1	6239.4	7307.13	5427.94	6467.78	6793.59	6970.58	6698.6	7450.44	5883.29	5088.01	7712.04	6657.67	7697.58	4942.14	8288.41	4589.12	6091.95	5424.8	4411.75	6149.7	7052.96	4206.3	5892.22	6108.88	6844.46	8067.23	6848.1	8667.24
K00340	nuoK; NADH-quinone oxidoreductase subunit K	8531.33	8970.43	5503.56	7452.74	6037.88	5427.15	7103.81	7322.6	9206.13	7350.43	7724.21	3770.23	8364.6	7439.73	7664.68	7795.22	4933.77	6230.41	7300.12	5423.49	6462.1	6788.8	6966.8	6696.11	7442.61	5874.18	5099.71	7707.79	6650.74	7699.8	4934.12	8284.76	4585.85	6089.72	5419.71	4407.41	6147.39	7046.56	4203.05	5883.7	6067.18	6827.6	8061.85	6841.89	8664.08
K00341	nuoL; NADH-quinone oxidoreductase subunit L	9169.4	9511.91	5770.2	7980.51	6418.65	5617.77	7453.51	7738.27	9734.83	7885.02	8297.51	3853.89	9052.09	7887.23	8109.8	8286.08	5470.76	6431.85	7548.84	5784.37	6817.56	7182.73	7508.07	7012.89	8073.05	6061.28	5243.58	8173.25	7021.23	7967.07	5214.75	8737.71	4918.3	6227.17	5660.43	4713.1	6467.55	7384.87	4315.46	6171.71	6147.31	7268.58	8386.59	7197.94	9364.96
K00342	nuoM; NADH-quinone oxidoreductase subunit M	8558.55	8962.16	5503.69	7481.01	6050.71	5437.63	7124.44	7333.72	9216.93	7348.42	7784.62	3829.71	8396.58	7465.15	7694.21	7823.02	4968.75	6288.84	7326.81	5451.88	6514.94	6807.46	6963.31	6709.09	7405.25	5901.67	5118.76	7734.37	6694.6	7748.52	4944.52	8297.8	4622.16	6104.49	5443.11	4461.81	6130.33	7051.31	4219.91	5914.77	6165.1	6837.55	8075.79	6852.21	8694.04
K00343	nuoN; NADH-quinone oxidoreductase subunit N	7867.28	8311.28	5076.36	7015.65	5351.69	4876.61	6493.18	6768.95	8299.22	6719.79	7274.9	3517.62	7907.01	6865.24	7023.4	7118.13	4692.92	5610.56	6547.72	5022.6	5818.86	6287.38	6493.62	5804.99	6868.09	5265.47	4666.95	7022.27	6061.93	7108.46	4622.02	7517.77	4323.16	5311.79	5206.73	4091.18	5840.24	6329.75	3910.05	5398.97	5694.02	6226.42	7236.77	6323.56	7996.63
K00344	Unclassified	579.389	958.858	617.853	476.373	693.502	440.877	641.233	620.579	912.136	607.936	768.724	1107.31	778.959	1009.61	731.112	572.478	604.415	528.067	634.14	552.002	708.603	758.245	605.189	479.899	495.519	553.941	684.848	519.059	1342.64	880.268	713.232	535.648	590.139	624.659	670.217	574.515	676.997	466.095	314.833	581.133	1015.18	619.398	534.156	519.29	946.467
K00346	Unclassified	9200.99	9282.52	5939.03	7815.57	6243.34	5598	7294.72	7601.44	9552.2	7371.11	8006.47	3499.01	8503.33	7645.72	8163.76	8065.24	4876.23	5378.07	8009.63	5557.72	6596.89	7126.88	6956.4	6663.33	7461.85	6603.26	5395.68	8245.87	6721.92	6801.71	4858.53	8507.36	4696.24	6458.81	5661.09	4305.89	6490.3	7491.24	4165.03	6033.35	4792.09	6877.98	8659.41	7251.85	8917.97
K00347	Unclassified	9397.33	9513.89	6197.83	7971.32	6487.88	5787.02	7602.03	7871.07	9932.62	7611.68	8263.35	4030.08	8787.38	7952.74	8424.66	8433.53	5491.59	5730.62	8270.09	5813.77	6935.26	7327.61	7246.03	6935.17	7722.02	6981.22	5836.13	8490.66	7305.58	7142.81	5312	8678.62	5155.27	6622.12	6023.57	4548.46	6807.79	7697.73	4501.71	6278.8	5134.18	7162.35	8889.44	7489.54	9180.78
K00348	Unclassified	9223.77	9246.61	5975.4	7743.57	6378.34	5649.75	7409.39	7568.37	9690.27	7488.68	8117.18	3596.76	8582.38	7865.03	8296.72	8157.36	4983.65	5586.12	8095	5621.99	6694.74	7245.49	7090.37	6794.93	7601.39	6649.84	5507.24	8341.59	6950.77	6977.6	4950.53	8462.73	4860.38	6479.64	5680.1	4343.36	6513.16	7507.17	4262.84	6122.18	4853.38	7067.71	8699.75	7222.31	9018.76
K00349	Unclassified	9144.81	9200.01	5933.6	7655.82	6287.42	5602.01	7307.81	7510.64	9549.31	7398.36	8008.04	3607.87	8485.18	7748.8	8140.23	8105.96	4993.52	5507.81	8017.6	5586.41	6660.7	7141.14	6985.53	6681.09	7470.59	6594.15	5487.82	8259.24	6875.31	6897.49	4937.98	8386.16	4818.3	6394.92	5660.84	4316.35	6507.66	7406.05	4254.02	6048.91	4847.63	6966.45	8659.6	7172.47	8919.8
K00350	Unclassified	9398.74	9501.24	6308.78	8029.15	6752.99	5860.97	7727.86	7892.96	10129.3	7771.93	8414.91	4008.72	8922.3	8056.55	8565.1	8584.42	5472.86	5750.12	8394.06	5940.02	7157.2	7442.07	7454.37	7127.98	7731.04	6949.25	5888.39	8623.87	7276.39	7180.47	5444.07	8678.55	5262.92	6743.86	6025.44	4673.75	6854.58	7758.68	4522.18	6462.7	4957.12	7243.5	8973.24	7589.02	9312.61
K00351	Unclassified	9672.53	9735.84	6160.56	8109.07	6510.18	5738.73	7545.15	7829.27	9886.23	7800.41	8441.29	3669.78	9059.03	8072.39	8408.86	8516.95	5468.4	5518.08	8159.73	5892.8	6903.2	7399.87	7412.02	6855.22	7913.46	6722.87	5621.09	8622.83	7114.05	7015.52	5165.91	8763.5	5057.22	6397.97	5867.83	4527.35	6815.02	7612.25	4327.33	6217.63	4889.9	7219.03	8943.62	7464.15	9516.99
K00354	Unclassified	332.336	438.937	217.483	277.226	429.894	202.084	364.286	300.26	463.364	288.302	461.378	780.37	314.895	484.531	437.721	323.31	520.891	257.675	352.468	430.843	507.201	294.823	313.306	276.632	339.201	358.368	469.886	374.999	1348.63	406.967	464.623	351.72	329.367	549.322	307.685	517.616	353.934	280.046	259.584	383.378	562.925	235.756	284.864	329.4	415.467
K00355	NQO1; NAD(P)H dehydrogenase (quinone)	417.495	713.501	360.932	327.403	435.259	352.746	335.429	389.735	580.102	287.683	574.732	597.279	420.636	411.197	441.674	486.722	866.741	442.867	388.251	383.454	495.099	506.264	409.561	328.003	477.311	615.386	535.39	351.768	651.617	454.83	471.648	577.67	358.632	383.962	805.616	581.258	448.534	423.922	379.229	517.371	617.932	429.199	482.762	419.982	404.128
K00356	Unclassified	73.881	36.7558	73.6932	43.7973	38.3336	43.3172	77.7578	119.788	135.73	72.3161	104.308	184.805	135.966	90.6719	55.3986	68.4756	74.0204	87.1577	60.4915	51.0597	35.0711	88.5369	67.3349	67.7616	72.8611	70.9326	103.175	88.7432	119.945	182.374	63.4714	92.7734	46.4336	34.0676	83.0875	43.7731	126.424	69.3343	31.9418	69.6162	265.78	137.684	45.6034	52.6295	57.8325
K00357	QDPR; dihydropteridine reductase	4.29023e-07	1.67708e-07	3.87369e-08	4.64524e-07	5.21782e-05	1.96784e-07	4.22552e-07	5.09687e-07	3.16139e-07	0.000130334	1.21292e-06	0.000125416	1.00032e-07	4.6776e-07	1.4515e-07	0.000117468	3.74199e-07	1.67708e-07	4.15053e-05	0.000169465	5.16341e-08	0.000227675	0.000143246	4.51627e-08	0.000221679	3.32272e-07	3.41933e-07	2.45137e-07	0.000155911	0.000359302	0.000257348	1.09694e-07	2.29049e-07	1.22591e-07	0.000278051	5.80598e-08	2.80638e-07	0.000117364	0.000134706	3.48405e-07	0.00137235	0.000598919	9.11997e-05	9.67968e-08	4.12936e-07
K00360	nasB; assimilatory nitrate reductase electron transfer subunit	2.00693	0.558589	1.09729	0.966167	1.03366	1.39471	0.470942	1.27986	1.76298	1.04027	1.19143	12.6008	1.21728	0.940523	1.99529	1.98156	3.83081	2.62949	1.10875	1.96952	2.31093	1.19794	1.04722	0.889655	1.7145	1.46037	2.74041	1.10778	4.32353	1.11381	4.36538	0.678821	2.16712	1.46805	2.06687	2.52342	0.721083	1.50336	1.28095	3.20348	1.54831	0.835607	0.306407	2.50157	1.23316
K00362	nirB; nitrite reductase (NADH) large subunit	394.86	592.354	333.909	245.376	417.276	288.25	363.394	374.453	415.235	318.241	512.109	624.171	452.669	464.806	337.892	443.775	479.292	345.669	332.687	331.304	362.15	551.481	364.41	234.337	321.939	478.33	510.89	332.258	511.742	475.719	404.593	327.952	411.443	261.903	537.148	293.483	518.976	325.21	336.287	392.435	740.73	368.717	361.572	340.231	304.16
K00363	nirD; nitrite reductase (NADH) small subunit	150.617	112.887	102.744	128.015	74.098	88.5624	139.871	167.432	223.879	126.091	236.632	280.141	199.64	182.038	122.06	121.996	102.772	122.624	93.719	94.7685	68.6177	183.009	129.713	102.606	133.132	115.602	128.772	110.178	177.966	212.206	89.8828	95.1469	81.3471	78.1389	205.835	76.0092	159.163	85.5886	65.5419	148.132	431.212	183.953	103.79	121.342	144.815
K00364	guaC; GMP reductase	1526.78	901.527	678.522	610.766	934.033	1594.41	723.174	1097.76	2153.83	779.737	957.605	1519.48	877.707	1348.83	1289.03	1025.93	2176.69	701.169	756.714	1100.44	1770.99	897.161	1258.53	549.084	849.262	1109.56	1537.77	885.869	3012.37	1429.25	1196.63	1071.79	1457.28	2441.03	887.871	1451.16	901.561	1199.71	1164.16	1942.73	1310.11	848.218	863.993	1190.77	1659.5
K00365	uaZ; urate oxidase	32.4409	13.3124	6.53229	29.144	11.5474	16.2012	27.522	34.6108	25.3136	16.3027	74.9206	104.303	11.6097	30.1176	14.6889	26.5144	33.888	28.882	9.47105	20.6366	11.7804	20.5337	11.411	7.05939	31.8223	27.223	28.6146	17.9806	54.1331	53.3422	19.8308	9.23801	20.2367	11.9863	29.4193	11.8033	28.3014	14.4675	14.0294	31.3042	138.511	40.0837	8.40203	12.1655	29.2106
K00366	nirA; ferredoxin-nitrite reductase	2444.42	3518.62	3165.29	2790.7	3131.54	2384.54	3246.7	3429.97	4382.8	2685	3396.46	5410.31	3305.41	2715.99	3594.05	3927.02	6154.82	3060.43	3189.52	2927.87	3770.47	2964.59	3796.79	2737.61	2445.65	3252.37	4042.45	3274.21	4175.04	3297.53	5129.82	2683.4	3705.54	2930.8	3152.08	3406	3012.3	2697.31	2321.72	3309.31	2430.68	2517.09	2894.68	2987.32	3358.28
K00367	narB; ferredoxin-nitrate reductase	65.8411	75.3468	42.2424	62.861	46.824	46.3386	55.3421	39.6517	74.799	58.5844	42.5355	37.0639	74.6775	72.1697	72.5982	53.1808	33.4597	50.4736	46.5433	42.322	44.1672	91.2239	73.9019	44.8249	57.0205	48.5717	37.1629	36.9571	49.7137	58.9716	45.5174	42.3157	28.9101	46.6022	59.4609	39.5548	57.3078	45.0564	29.8842	66.7366	94.2819	55.64	61.2438	59.0784	66.1725
K00368	nirK; nitrite reductase (NO-forming)	197.22	122.421	127.065	88.5463	71.6861	87.768	77.4417	73.383	177.951	103.878	247.314	106.211	75.4142	181.446	161.933	102.496	72.5856	68.2753	100.003	100.061	72.1615	241.17	88.2807	50.6452	136.703	313.96	155.475	99.8568	195.323	176.743	61.0933	66.8739	55.9882	67.6743	131.934	56.8434	163.541	99.1838	75.4622	136.924	336.583	231.366	166.248	172.667	162.14
K00370	narG; nitrate reductase / nitrite oxidoreductase, alpha subunit	213.86	532.049	198.5	159.746	247.182	349.584	238.693	212.994	262.147	129.687	324.289	252.982	167.676	274.133	283.284	218.26	251.378	274.025	174.438	150.946	200.013	321.097	208.052	119.254	172.908	344.586	283.843	201.594	365.196	465.425	211.526	212.788	92.8128	289.338	279.435	208.669	291.612	267.844	122.958	235.146	495.543	246.81	273.9	211.581	469.335
K00371	narH; nitrate reductase / nitrite oxidoreductase, beta subunit	214.04	531.48	197.996	158.398	246.559	348.784	237.162	211.392	261	128.807	320.62	248.102	166.93	272.55	282.367	217.048	249.109	273.424	176.596	149.761	199.065	320.78	207.295	118.917	171.528	343.107	282.034	200.601	361.974	463.602	210.224	212.243	91.6502	289.165	308.015	207.952	290.013	267.144	122.083	233.474	489.049	245.752	273.357	210.862	467.87
K00372	nasA; assimilatory nitrate reductase catalytic subunit	246.485	274.58	375.037	248.503	245.349	230.571	259.061	223.158	448.884	281.946	293.538	556.275	402.159	274.079	271.39	296.472	607.175	296.843	247.174	201.866	313.195	414.242	478.115	210.47	300.696	389.791	403.408	287.391	348.464	378.92	328.632	337.445	264.388	191.687	316.792	291.362	282.344	352.613	237.677	386.897	356.838	354.132	247.516	273.129	196.103
K00373	narJ; nitrate reductase molybdenum cofactor assembly chaperone NarJ/NarW	219.963	538.398	220.106	166.028	258.284	348.629	243.382	227.622	292.706	137.486	275.532	247.487	192.324	238.926	264.1	229.224	251.449	318.682	186.73	153.579	216.683	334.827	226.771	133.032	175.998	237.441	239.392	222.555	323.779	461.442	223.143	226.264	95.2228	312.005	320.537	217.46	315.217	283.857	134.704	248.531	432.85	230.487	286.581	183.58	463.237
K00374	narI; nitrate reductase gamma subunit	307.254	766.791	284.799	281.331	288.511	522.587	391.391	287.186	332.693	177.172	387.545	330.496	231.662	437.433	457.523	330.667	311.317	416.061	278.77	183.314	253.008	431.849	305.939	210.305	239.258	519.554	365.407	319.383	472.36	557.087	331.293	300.608	90.0644	343.854	385.259	278.181	444.516	336.51	178.349	308.406	619.225	371.974	424.926	268.238	566.468
K00375	Unclassified	8248.62	10454.3	8722.06	8398.92	8021.06	7685.98	7518.54	10715.1	12552.1	7580.63	10552.6	13592.9	9868.26	8352.07	9909.02	11027.3	13941.1	8996.13	8911.1	8167.48	9977.69	8931.73	9416.62	8465.79	7516.65	9086.18	11241	9387.27	10713.6	10596.3	12924.4	9485.71	10469.1	7973.52	10165.1	8929.97	9780.27	8351.9	6870.42	9498.29	8592.06	7434.77	9168.38	8534.6	8354.43
K00376	nosZ; nitrous-oxide reductase	757.815	307.215	472.725	435.888	226.723	243.186	342.002	340.829	662.947	434.647	515.015	213.798	328.325	446.972	605.6	338.876	161.152	211.435	603.484	266.873	229.022	738.289	294.028	213.659	492.006	536.686	353.277	483.767	443.142	434.512	185.026	275.988	161.033	310.028	495.029	170.381	533.402	473.542	181.774	395.808	439.911	559.323	661.473	554.733	424.264
K00380	cysJ; sulfite reductase (NADPH) flavoprotein alpha-component	312.173	306.776	178.075	277.306	147.85	188.409	228.474	228.534	278.625	230.258	434.113	139.941	286.426	358.113	288.186	212.105	93.2159	1076.22	229.507	146.941	167.347	386.839	245.168	166.959	249.803	424.794	327.399	176.02	255.781	1570.25	149.898	224.321	102.426	190.853	343.698	147.572	226.869	218.593	373.61	240.355	1834.09	401.481	265.692	331.381	243.915
K00381	cysI; sulfite reductase (NADPH) hemoprotein beta-component	86.5149	76.5242	85.7666	48.8607	34.5244	60.3365	80.4951	109.349	166.77	95.9182	280.78	142.438	145.369	174.639	100.394	96.1544	49.6284	532.322	84.3744	54.6851	56.2713	126.284	75.1181	86.8632	88.3936	214.928	210.796	94.9281	170.171	843.885	58.5605	79.465	59.9284	30.719	136.986	56.8239	96.4007	44.2267	193.571	96.0101	990.423	224.762	69.102	111.068	79.7533
K00382	DLD; dihydrolipoamide dehydrogenase	19075.1	21897.5	15658.2	17480.5	15269.6	13992.9	15274.5	18508	21160.1	16476.6	19729.3	19984.9	19426.5	19751.5	18520.6	20195.3	21955.2	15883.9	16031.2	14685.8	18736.5	17722.5	17878.6	14415.4	17275.2	18623.4	19274.9	19027.7	21687.9	21334.6	20781.6	18178.4	18578.2	13984.8	16304.5	14839.9	19027.1	15783.3	12029.7	17604.6	18756.5	15777.2	18329.1	18072.5	19623.3
K00383	GSR; glutathione reductase (NADPH)	656.822	456.69	346.216	442.715	487.797	1122.21	378.936	780.057	1126.68	403.91	365.493	1050.79	564.299	550.129	758.625	485.547	1834.4	248.264	454.283	792.987	1145.7	625.291	666.842	217.661	516.612	767.406	1105.31	464.925	1548.85	656.065	1075.79	783.548	1279.39	851.368	575.125	1018.67	635.372	566.823	862.901	1530.92	727.716	569.188	442.044	823.719	851.527
K00384	trxB; thioredoxin reductase (NADPH)	32820.4	36587.6	29728	30577	29779	27981.3	29333.6	35768.9	46527.3	28553.4	36034.1	42096.6	35771	31427.7	35355	39048.8	45737.1	30492.8	32296.4	29682.3	36152	32439.4	35145.5	29891.3	28357.8	32937.5	37364.2	34428.6	40358.4	35829.3	41180.5	34209.8	34367.2	32245.3	33064.9	30184.2	33880.5	31276.1	24211.5	34969.3	30699.7	27802.4	33366.8	32303.5	33029.2
K00385	asrC; anaerobic sulfite reductase subunit C	1191.72	1670.6	1409.54	1217.13	1221.32	1124.58	1090.58	1514.5	1782.27	1213.25	1572.87	2899.1	1289.02	1316.03	1452.85	1806.84	2659.74	1683.2	1281.28	1376.24	1519.62	1463.45	1738.09	1067.01	1351.95	1707.58	2017.77	1624.65	1802.12	1776.82	2218.52	1401.96	1829.22	1307.68	1767.35	1733.5	1769.63	1163.29	1149.35	1616.29	1665.69	1175.77	1389.76	1495.32	971.952
K00387	SUOX; sulfite oxidase	5.11272	1.96467	0.506514	5.46608	1.74873	2.3595	4.93288	6.01425	3.78785	2.08149	14.1947	15.4013	1.22348	5.49394	1.95889	3.34425	4.5708	2.11839	1.44334	2.93355	0.731358	0.670929	1.40288	0.56787	5.0248	3.92624	4.11638	2.91078	7.84936	6.55902	1.48816	1.31861	2.78928	1.51555	4.27461	0.823587	3.28901	2.10838	1.7205	4.23004	24.5122	3.61514	1.20426	1.25308	4.87182
K00389	Unclassified	333.671	829.41	295.12	211.144	497.045	250.869	303.557	257.342	319.388	252.304	369.771	341.576	261.712	221.548	221.604	287.21	275.231	168.431	219.653	280.041	294.201	583.659	355.42	109.644	308.549	187.549	163.643	165.04	222.493	227.217	200.185	292.111	208.271	292.034	282.655	186.974	340.411	232.331	117.228	251.738	474.135	247.801	354.078	182.223	337.364
K00390	cysH; phosphoadenosine phosphosulfate reductase	3739.42	3442.32	3098.91	3169.57	2867.71	2595.6	3053.79	3432.85	4778.18	2960.31	3696.5	4775.47	3455.77	3035.43	3529.69	3918.8	4954.64	3072.9	3178.96	2981.36	3514.38	3404.48	3502.02	2694.22	2735.7	3838.29	3626.79	3420.36	4348.23	3980.04	4026.7	2677.61	3512.94	3222.94	3412.96	2860.84	3740.5	2771.68	2360.4	3653.85	4059.93	2800.39	3298.9	3274.83	3085.28
K00392	sir; sulfite reductase (ferredoxin)	287.388	284.544	172.308	266.045	142.446	205.916	232.899	196.821	343.462	257.338	236.401	275.841	306.355	329.447	290.033	218.507	149.95	232.353	183.767	198.417	189.57	339.903	301.653	192.42	262.841	213.339	200.304	183.891	260.005	248.093	185.207	191.833	159.792	169.723	256.614	168.394	242.638	199.317	146.332	286.651	435.324	225.811	258.102	298.712	300.142
K00394	aprA; adenylylsulfate reductase, subunit A	492.13	721.311	459.242	520.732	329.032	571.758	503.021	506.486	539.755	334.398	402.4	728.31	434.805	597.522	728.689	550.516	612.83	525.899	435.841	333.823	425.001	586.051	542.664	412.155	414.482	668.284	518.266	563.179	584.64	583.33	649.971	497.501	346.421	365.297	516.337	446.592	609.431	490.423	357.296	415.403	624.057	477.391	540.229	387.126	454.477
K00395	aprB; adenylylsulfate reductase, subunit B	607.937	1012.9	564.473	676.467	381.742	787.733	691.319	604.592	629.718	391.159	494.539	836.541	511.131	800.837	941.15	699.672	690.184	696.852	559.699	375.801	486.51	725.869	665.165	524.355	501.319	895.625	617.503	703.732	722.247	697.19	797.551	607.355	344.803	430.308	612.454	531.82	799.552	576.909	423.374	508.107	799.328	635.543	721.984	457.651	579.33
K00399	mcrA; methyl-coenzyme M reductase alpha subunit	38.7589	74.8976	0.00586697	11.2096	93.8918	101.717	34.6798	74.9208	0.0297584	48.4502	22.8668	0.108513	18.5704	8.33758	0.0158732	48.0898	4.53462	2.27629	0.898081	41.3728	4.48166	3.47314	52.5354	0.00366746	23.6808	18.4226	0.0391099	2.99696	0.462175	23.6541	65.9492	36.8842	42.4905	0.0144906	11.931	0.0124294	1.08282	0.255278	0.0151563	0.0282924	3.31559	1.00712	11.3805	29.0296	0.0380682
K00400	methyl coenzyme M reductase system	67.1764	130.183	0.00718018	19.4614	163.202	176.802	60.2608	130.207	0.0337677	77.3245	37.1047	0.120799	20.079	6.63589	0.018532	83.5765	7.8525	3.40848	1.34322	71.9047	7.78709	5.20802	91.3147	0.00402414	40.8343	22.0635	0.0460089	2.53953	0.671198	24.4095	114.633	64.1098	73.8473	0.0171376	20.5464	0.0157435	1.61364	0.377221	0.0176205	0.0310439	4.90481	1.49558	16.3269	46.149	0.0430082
K00401	mcrB; methyl-coenzyme M reductase beta subunit	38.7501	74.8941	0.00507024	11.2	93.8889	101.713	34.6711	74.9103	0.0232562	48.4466	22.8418	0.0826371	18.5684	8.32796	0.0128878	48.0841	4.52692	2.27284	0.895626	41.3679	4.4806	3.47208	52.533	0.00273856	23.6721	18.4157	0.0320771	2.99191	0.448707	23.6426	65.947	36.8819	42.4858	0.0119692	11.9236	0.0112353	1.07705	0.251696	0.0122365	0.0211264	3.27247	1.00031	11.3784	29.0276	0.029575
K00402	mcrG; methyl-coenzyme M reductase gamma subunit	38.7501	74.8941	0.00507024	11.2	93.8889	101.713	34.6711	74.9103	0.0232562	48.4466	22.8418	0.0826371	18.5684	8.32796	0.0128878	48.0841	4.52692	2.27284	0.895626	41.3679	4.4806	3.47208	52.533	0.00273856	23.6721	18.4157	0.0320771	2.99192	0.448707	23.6426	65.947	36.8819	42.4858	0.0119692	11.9236	0.0112353	1.07705	0.251696	0.0122365	0.0211264	3.27247	1.00031	11.3784	29.0276	0.029575
K00404	ccoN; cytochrome c oxidase cbb3-type subunit I	82.9173	58.1592	165.729	64.5218	24.2072	44.6149	108.345	173.695	305.865	131.381	97.0474	65.6564	356.945	210.854	98.8486	65.2986	18.5772	161.366	96.1504	53.4289	45.694	200.273	100.904	156.366	93.4061	95.1061	97.2521	170.812	104.81	321.754	47.4774	126.536	42.6583	84.6606	84.385	76.3171	143.746	82.5532	39.5524	94.2026	315.763	313.684	163.631	61.5824	99.2392
K00405	ccoO; cytochrome c oxidase cbb3-type subunit II	62.4224	42.6868	78.036	54.1746	24.7397	31.3919	59.9946	73.0922	138.572	81.6698	51.415	48.8741	172.016	122.743	66.4171	38.3417	21.3391	109.729	42.8997	40.955	45.6554	170.555	48.0456	83.4401	81.7656	67.212	45.991	99.6427	68.7309	215.256	37.8699	77.3287	27.5409	64.609	54.7304	45.4918	69.6932	65.9215	31.5515	62.7632	310.164	203.21	126.03	41.8004	72.6038
K00406	ccoP; cytochrome c oxidase cbb3-type subunit III	331.283	361.396	192.936	301.983	218.2	233.12	278.495	182.817	374.888	279.335	292.311	140.691	391.677	470.027	376.629	247.773	114.068	288.312	199.552	205.847	224.627	548.216	321.186	240.51	305.161	441.557	244.343	185.318	265.97	323.723	172.875	224.414	129.456	234.003	309.546	191.175	269.367	233.672	186.486	303.274	674.175	396.687	347.2	335.94	355.83
K00407	ccoQ; cytochrome c oxidase cbb3-type subunit IV	24.4582	0.390229	9.6611	9.2202	8.56149	2.8431	0.983207	2.90495	14.6052	14.7457	9.64531	15.7154	18.2127	37.6358	9.47836	6.03979	4.18224	12.152	0.27772	6.71482	4.56915	31.1332	5.44089	18.9325	25.8784	7.42988	6.33731	12.9545	8.92794	24.6253	11.0182	20.6313	3.7187	0.285249	4.4111	0.135096	9.98494	3.19077	1.92319	27.4577	58.8612	40.5669	13.5537	0.22523	0.960833
K00410	fbcH; ubiquinol-cytochrome c reductase cytochrome b/c1 subunit	0.945395	0.0773877	0.000194077	0.00232733	9.80748	0.154081	0.00211704	0.525734	0.952318	0.000872663	0.0348109	0.0350428	6.36753	0.00234354	0.000727219	0.0683991	2.52054	0.278296	0.029332	6.51113	0.570976	0.59971	0.000581775	4.87721	10.723	0.0686724	0.00171558	7.79303	0.573998	6.82773	0.220636	1.03737	0.00114757	0.000614198	0.26971	0.0768383	0.0684138	0.000872663	0.000711236	0.00174555	18.8676	0.00153549	0.000517159	0.000484965	0.00206886
K00411	UQCRFS1; ubiquinol-cytochrome c reductase iron-sulfur subunit	56.0301	14.0695	54.5298	15.5349	15.308	20.4109	25.4656	57.761	98.6075	44.4704	38.2192	34.7404	116.467	88.5476	29.2153	26.9365	7.05532	56.293	28.9942	15.5096	5.22509	53.6571	31.1192	55.8133	36.4517	32.5895	36.4788	54.0302	28.1999	81.6481	32.4128	53.0657	11.1338	10.778	38.4428	25.8415	53.7617	10.9562	9.95615	43.1578	111.109	90.979	34.0465	10.7769	19.8121
K00412	CYTB; ubiquinol-cytochrome c reductase cytochrome b subunit	109.864	120.232	94.5149	74.4671	36.9784	99.6495	101.073	101.202	136.637	73.0164	88.4709	102.264	149.037	167.586	107.217	87.0133	49.7272	156.016	75.1626	37.8703	33.3931	108.865	78.6973	94.6925	81.7819	123.782	83.3428	108.572	96.4922	165.807	96.3938	94.9362	17.9759	36.9993	87.6259	60.7611	130.718	44.9201	38.5109	89.8303	244.4	188.919	100.203	40.9099	69.7241
K00413	CYC1; ubiquinol-cytochrome c reductase cytochrome c1 subunit	54.9193	15.9478	54.9302	14.3858	15.0031	23.003	25.5662	58.168	97.9679	44.6324	37.948	35.2373	115.023	84.0769	29.6199	28.4723	6.24988	60.5941	29.6587	14.485	5.19648	51.2195	31.6696	54.3219	33.3154	32.799	36.831	52.3001	27.5267	78.689	36.0908	53.2141	11.7522	10.9062	42.5384	27.4042	53.9885	11.3461	10.5311	41.3025	111.433	86.3718	32.6645	11.3104	20.1954
K00417	QCR7; ubiquinol-cytochrome c reductase subunit 7	1.28505e-48	5.02337e-49	1.16029e-49	1.39139e-48	4.34767e-49	5.89427e-49	1.26567e-48	1.52667e-48	9.46933e-49	5.21721e-49	3.63307e-48	3.76835e-48	2.99628e-49	1.40108e-48	4.34767e-49	8.30904e-49	1.12084e-48	5.02337e-49	3.57506e-49	7.24703e-49	1.5466e-49	1.5466e-49	3.47814e-49	1.35276e-49	1.26581e-48	9.95255e-49	1.02419e-48	7.34258e-49	1.96144e-48	1.67164e-48	3.18875e-49	3.28567e-49	6.86072e-49	3.67197e-49	1.07265e-48	1.73907e-49	8.40596e-49	5.21721e-49	4.25212e-49	1.04358e-48	6.28058e-48	9.17994e-49	3.09183e-49	2.89936e-49	1.23687e-48
K00420	QCR10; ubiquinol-cytochrome c reductase subunit 10	5.93368e-78	2.31952e-78	5.35758e-79	6.42468e-78	2.00752e-78	2.72165e-78	5.84417e-78	7.04931e-78	4.37242e-78	2.40902e-78	1.67755e-77	1.74002e-77	1.38352e-78	6.46943e-78	2.00752e-78	3.83666e-78	5.17542e-78	2.31952e-78	1.65076e-78	3.34628e-78	7.14134e-79	7.14134e-79	1.60601e-78	6.24631e-79	5.8448e-78	4.59554e-78	4.72917e-78	3.3904e-78	9.05683e-78	7.7187e-78	1.47239e-78	1.51714e-78	3.16791e-78	1.69552e-78	4.95292e-78	8.03007e-79	3.88141e-78	2.40902e-78	1.9634e-78	4.81867e-78	2.90003e-77	4.23879e-78	1.42764e-78	1.33876e-78	5.71118e-78
K00422	E1.10.3.1; polyphenol oxidase	0.00108668	0.000384707	8.8859e-05	0.00106558	0.00033296	0.000451404	0.000969295	0.0012332	0.000853235	0.000399552	0.00278233	0.00288593	0.000293486	0.001073	0.0978096	0.000636335	0.00093524	0.000384707	0.00027379	0.000644706	0.000195306	0.000195306	0.000266368	0.000103599	0.0009694	0.000762201	0.000784364	0.48265	0.001579	0.0012802	0.000244205	0.000379669	0.000525418	0.000281213	0.000821475	0.000133184	0.000643757	0.000399552	0.000325642	0.000799208	0.00480989	0.000703032	0.000236783	0.000222043	0.0984239
K00423	E1.10.3.3; L-ascorbate oxidase	8.04913e-06	3.14646e-06	7.26765e-07	8.71519e-06	0.348843	3.69196e-06	7.92772e-06	9.56251e-06	5.93126e-06	3.26788e-06	2.27563e-05	2.36036e-05	0.209306	8.7759e-06	2.72323e-06	5.20449e-06	0.0697751	3.14646e-06	2.23929e-06	0.209309	9.68735e-07	9.68735e-07	2.17858e-06	0.174676	0.383987	6.23393e-06	6.4152e-06	0.279077	1.22857e-05	0.244454	1.99732e-06	2.05803e-06	4.29732e-06	2.3e-06	6.71873e-06	1.08929e-06	5.2652e-06	3.26788e-06	2.66338e-06	6.53661e-06	0.663091	5.74999e-06	1.93661e-06	1.81606e-06	7.74731e-06
K00425	cydA; cytochrome bd ubiquinol oxidase subunit I	10538.2	11098.8	6615.58	8830.97	7329.11	7525.4	8482.48	9385.83	11689.5	8613.15	9310.16	5096	10199	9117.79	9359.74	9648.22	7092.2	7085.53	8966.45	6828.11	8506.83	7976.33	8740.6	7910.12	8690.6	7433.26	7008.81	9328.35	9194.35	9172.45	6231.44	10415.5	6114.52	8623.95	6614.13	5632.8	7632.35	8855.1	5512.03	7870.07	7155.83	7836.62	9630.16	8596.99	11048.6
K00426	cydB; cytochrome bd ubiquinol oxidase subunit II	9927.13	10386.4	6296.51	8268.36	7138.96	7323.05	8178.81	8801.87	11339.6	8177.19	8834.32	4904.9	9548.51	8786.36	9129.77	9080.6	6510.2	6956.74	8766.16	6473.91	8172.65	7732.7	8271.88	7767.63	8220.16	7177.26	6732.76	8899.4	8893.26	8955.15	5902.28	9953.09	5769.41	8521.02	6218.24	5404.82	7155.42	8582.23	5264.72	7654.64	6922.02	7474.48	9272.15	8196.23	10399.9
K00427	Unclassified	5.09601	1.76505	0.866014	0.191048	6.18584	0.421083	0.487768	0.380169	0.533502	0.951237	0.883911	5.40269	4.36536	0.818923	0.892116	2.09436	2.89866	0.800061	5.87878	4.16983	1.14866	1.18987	0.589653	3.72254	6.60827	1.34872	2.74344	5.27263	2.29358	7.68191	1.47246	1.60692	0.778675	1.48732	61.2926	0.822673	1.81086	0.549348	0.66434	1.10556	12.1075	6.39632	0.779637	0.839503	0.48499
K00428	Unclassified	4502.69	4174.03	3195.8	3447.98	3374.29	3319.41	3770.84	3484.85	5593.87	3435.42	3312.51	1975.29	3744.85	4241.24	4661.59	3875.15	1484.77	4496.42	4692.83	2575.92	3491.92	4137.71	3139.42	4552.72	3223.87	4377.44	3075.3	4452.25	3525.06	4935.34	2228.22	4273.77	1990.53	4368.9	2640.48	1995.97	2861.2	4041.07	2379.77	3424.59	4396.89	3772.42	5109.69	3643.9	4197.43
K00430	E1.11.1.7; peroxidase	6.63251e-10	2.5927e-10	5.98857e-11	7.18135e-10	2.24395e-10	3.04219e-10	6.53247e-10	7.87955e-10	4.88738e-10	2.69274e-10	1.87513e-09	1.94495e-09	1.54646e-10	7.23137e-10	0.0298033	4.28852e-10	5.78496e-10	2.5927e-10	1.84518e-10	3.74039e-10	7.98241e-11	7.98241e-11	1.79516e-10	6.98196e-11	6.53317e-10	5.13678e-10	5.28614e-10	3.78971e-10	1.01235e-09	8.62776e-10	1.6458e-10	1.69582e-10	3.541e-10	1.89521e-10	5.53625e-10	8.97581e-11	4.33854e-10	2.69274e-10	2.19463e-10	5.38619e-10	3.24158e-09	4.73801e-10	1.59578e-10	2.11074e-08	6.38381e-10
K00432	gpx; glutathione peroxidase	6802.63	5723.05	5299.85	5744	4873.83	4742.57	5255.55	6148.14	8375.26	5537.15	6865	6822.21	5151.4	6184.87	6862.29	5935.45	6441.19	4343.85	5467.51	4721.11	5622.13	6211.34	5843.68	4391.71	5562.65	6179.01	6315.7	5645.72	8202.25	6405.15	6387.05	5151.98	6451.32	4518	6557.23	4511.03	6131.08	5204.61	4122.85	5942.11	6107.27	5199.35	5468.4	6277.18	5750.46
K00433	Unclassified	1877.98	1909.51	1629.83	1725.42	1618.95	1460.35	1356.31	2191.64	2471.1	1642.83	2179.14	3136.59	1610.77	1657.97	1994.09	1888.02	3580.11	1671.37	1427.67	1544.89	1881.07	1811.01	1885.58	1554.34	1721.29	1747.91	2154.02	1799.81	2587.83	1937.91	2511.26	1434.29	2591.8	1580.08	2263.1	1842.28	1864.03	1352.39	1278.62	1973.57	2208.56	1479.97	1595	1562.07	1679.86
K00435	hemQ; hydrogen peroxide-dependent heme synthase	35.8899	27.1201	16.1921	39.0391	37.5967	40.2927	26.322	75.378	83.7756	26.8811	36.757	50.9893	50.5647	50.0874	75.4138	27.4556	117.021	9.25801	12.1306	85.2099	101.11	31.3354	42.7926	3.99994	29.4042	78.5681	73.771	17.5563	143.71	48.2549	105.058	79.8139	123.062	34.2666	23.5566	54.8429	57.8583	31.3607	49.3967	123.464	46.1483	59.9355	13.7902	61.4371	93.9945
K00436	Unclassified	398.091	5.06421	287.55	63.3602	2.65446	64.5941	6.6409	6.29395	283.674	111.764	135.264	48.57	2.68572	114.37	191.749	24.2345	11.2555	7.04112	164.73	81.9195	4.75096	354.247	3.11805	0.850444	161.063	275.119	87.9732	185.596	168.905	95.9805	7.69606	1.78028	5.35422	63.5607	158.54	4.07403	245.911	127.877	50.9185	126.463	59.5032	263.282	300.061	163.25	120.799
K00437	Unclassified	99.5169	237.292	87.3078	127.056	43.5594	175.79	157.898	80.6946	74.2183	50.1726	78.3914	93.8704	67.4786	169.991	176.671	116.01	66.7734	152.234	106.027	35.8696	54.148	124.037	99.8441	91.1736	76.4684	186.623	87.1869	121.447	119.261	131.289	122.24	89.3891	0.927039	55.9994	82.7761	70.6734	161.918	71.6945	55.0158	77.7301	160.944	132.842	152.536	58.2657	102.718
K00440	frhA; coenzyme F420 hydrogenase subunit alpha	33.843	65.2627	0.0434323	10.2012	81.7493	88.601	30.5589	65.6202	0.338024	42.5769	21.1821	1.33619	16.5467	7.9205	0.157202	42.0712	4.31163	1.31017	0.570413	36.1979	3.94625	1.78908	45.7757	0.0477598	20.5229	16.031	0.371882	2.83762	0.899024	18.5791	57.4246	32.166	37.1567	0.133754	10.4556	0.0683944	0.83122	0.304763	0.153413	0.36844	3.79005	0.819774	10.1408	25.5109	0.440795
K00441	frhB; coenzyme F420 hydrogenase subunit beta	342.352	504.501	314.103	356.316	554.742	500.405	415.032	543.665	419.559	407.495	426.375	330.031	365.705	404.887	410.223	429.573	269.108	308.012	298.738	316.157	280.788	332.257	441.531	290.7	387.093	333.28	323.964	308.461	398.287	463.906	440.76	528.113	395.875	314.815	295.52	201.873	280.896	271.29	261.783	323.337	283.666	280.182	234.486	365.391	299.524
K00442	frhD; coenzyme F420 hydrogenase subunit delta	62.7035	96.6798	34.8756	20.7209	109.829	92.6236	61.701	107.714	50.8499	105.05	37.0621	16.5972	21.7332	22.9463	9.82255	60.8332	22.5357	37.0072	1.41257	36.5645	15.0224	41.1475	91.6763	6.90234	158.201	22.5837	3.03074	17.0524	29.4889	39.9498	76.9546	41.5794	46.4155	8.16354	31.6349	13.3845	65.4943	41.9164	10.4204	9.4932	45.2051	94.5715	20.5778	48.6137	14.6608
K00443	frhG; coenzyme F420 hydrogenase subunit gamma	33.8506	65.2654	0.0439438	10.2101	81.7515	88.6045	30.5668	65.6299	0.343735	40.6409	20.4785	1.35976	13.152	5.74544	0.159637	42.0758	4.31638	1.31307	0.5727	36.2024	3.94708	1.79007	45.7776	0.0486252	20.5309	13.3673	0.377473	2.11574	0.911148	14.4668	57.4265	32.1681	37.1607	0.135718	10.4621	0.068853	0.835674	0.3081	0.155826	0.375115	3.83022	0.825646	9.17114	24.2998	0.448323
K00446	dmpB; catechol 2,3-dioxygenase	63.6381	41.6329	25.2384	58.1474	30.3511	36.5733	61.4138	70.6012	54.932	35.6882	147.049	202.448	31.5607	63.1321	41.861	54.8533	87.2636	35.4066	26.4183	46.2129	35.7098	27.8153	32.7277	21.4408	60.6596	57.1517	75.6521	41.4649	128.042	74.5846	55.115	25.2577	50.1032	26.9466	63.0527	35.0862	58.7417	31.0223	34.0035	68.5383	258.34	49.585	21.7819	30.9314	58.2591
K00448	pcaG; protocatechuate 3,4-dioxygenase, alpha subunit	21.9475	7.73912	3.29256	21.0473	8.02748	9.82447	19.4421	23.8164	16.7786	9.0983	54.1268	72.2096	6.71359	21.4353	8.5882	17.5938	19.7258	10.3485	6.12687	13.0295	4.57665	5.61433	5.98193	3.51666	20.1513	16.0544	20.8057	12.2581	32.9298	30.394	8.00494	8.4282	12.4634	7.01767	20.3065	4.52659	14.5109	9.27063	7.61709	17.5268	93.7735	15.24	5.27258	8.42833	18.9247
K00449	pcaH; protocatechuate 3,4-dioxygenase, beta subunit	110.387	107.399	66.7738	102.951	64.2175	73.8783	88.8892	62.347	132.258	92.3679	59.9391	62.7886	127.335	118.133	118.653	72.7326	39.757	111.433	69.0529	64.1309	62.9808	157.098	120.198	74.8259	99.2724	71.3524	55.0942	59.9939	61.7984	90.0741	55.0422	66.8902	41.2046	72.3771	95.916	62.725	86.5002	72.8711	44.8059	103.834	127.263	105.547	99.8653	100.587	118.257
K00450	E1.13.11.4; gentisate 1,2-dioxygenase	147.025	134.253	133.342	119.985	133.847	125.277	139.523	156.08	178.635	124.034	147.191	226.052	190.383	121.296	116.844	216.195	250.389	167.955	176.712	139.809	147.034	257.627	167.786	140.425	158.843	181.144	196.781	279.885	195.38	213.571	240.583	190.939	162.366	158.942	207.928	134.148	161.495	141.89	125.429	159.892	172.953	186.678	130.636	149.338	141.097
K00451	HGD; homogentisate 1,2-dioxygenase	734.601	325.621	481.853	375.144	200.978	292.708	279.092	199.009	671.886	384.468	382.638	258.897	375.521	513.664	547.034	245.359	141.9	269.334	376.917	280.073	196.639	783.073	353.491	225.696	447.626	559.139	277.183	361.349	400.137	325.429	182.703	203.068	135.519	276.562	461.151	179.812	487.962	350.735	194.385	433.774	546.339	525.941	591.38	476.743	460.841
K00452	HAAO; 3-hydroxyanthranilate 3,4-dioxygenase	147.314	159.936	86.445	133.482	94.1502	103.275	122.487	81.974	168.558	122.571	98.806	57.2961	167.825	177.678	159.91	104.671	53.5444	110.878	97.3235	86.5546	90.8982	207.349	157.205	99.8634	119.206	137.666	85.987	75.5401	97.4219	94.4124	74.7492	89.7385	56.8287	96.4012	130.794	82.9192	120.524	96.8576	67.3974	134.125	173.987	112.243	133.322	142.951	153.226
K00453	TDO2; tryptophan 2,3-dioxygenase	266.571	231.015	151.633	253.655	142.907	176.912	216.433	155.74	307.397	213.886	198.732	182.877	293.032	311.33	276.684	163.104	107.954	206.354	162.47	152.781	143.995	329.216	272.38	174.655	225.195	206.574	141.412	145.505	195.807	181.757	134.7	153.704	100.361	165.612	237.433	133.868	189.435	173.992	110.386	240.475	401.061	194.241	226.956	247.033	272.934
K00454	LOX2S; lipoxygenase	0.000232279	9.07997e-05	2.09728e-05	0.0002515	7.85861e-05	0.000106542	0.000228776	0.000275952	0.000171162	9.43034e-05	0.000656694	0.000681146	5.41591e-05	0.000253252	7.85861e-05	0.00015019	0.000202597	9.07997e-05	6.46208e-05	0.000130993	2.79554e-05	2.79554e-05	6.28689e-05	2.44518e-05	0.0002288	0.000179897	0.000185128	0.000132721	0.000354538	0.000302156	5.76381e-05	5.93899e-05	0.000124011	6.63726e-05	0.000193887	3.14345e-05	0.000151941	9.43034e-05	7.6859e-05	0.000188631	0.00113524	0.000165931	5.58862e-05	5.24072e-05	0.00022357
K00455	hpaD; 3,4-dihydroxyphenylacetate 2,3-dioxygenase	3.94006	5.02454	3.55958	1.32733	4.64348	2.48512	3.00105	2.76683	3.51565	3.22677	3.28768	15.7075	5.46336	2.48115	4.15169	4.1292	11.7665	2.36339	2.243	7.04693	6.72056	2.70936	3.63743	3.20575	5.22958	5.42475	7.61212	4.80635	12.5074	4.66036	8.65073	2.6758	4.89677	2.21066	5.17317	5.13877	6.54017	2.63524	4.61478	6.40365	11.4518	2.16664	2.21163	4.43808	2.88043
K00456	CDO1; cysteine dioxygenase	3.21192	6.88937	1.89259	1.131	3.85077	2.37896	2.77839	2.1517	1.83325	2.80266	5.18639	4.83482	2.21789	3.74756	3.38347	4.74162	4.33362	1.10789	2.13649	2.99165	3.8891	3.56553	2.61201	1.31705	2.34107	6.70295	5.39109	0.953441	5.9493	4.42177	3.98379	2.15837	2.93193	1.97835	2.99674	2.94967	5.01068	1.68964	1.98213	3.84677	7.75396	4.66178	2.14854	2.64758	2.7271
K00457	HPD; 4-hydroxyphenylpyruvate dioxygenase	737.09	326.74	479.899	378.777	201.638	292.564	281.172	201.066	669.387	390.575	389.841	279.695	375.717	519.332	544.034	250.638	144.128	269.571	377.338	281.955	195.81	780.991	352.018	223.594	448.353	564.207	286.984	363.268	405.718	337.339	181.715	207.871	135.104	277.132	461.554	179.645	490.2	350.307	195.163	437.227	556.97	530.274	592.543	478.196	462.667
K00459	ncd2; nitronate monooxygenase	1374.4	999.819	1227.93	895.522	700.46	740.717	722.891	1039.75	1761.04	1056.2	1195.73	1303.29	883.248	1130.12	1129.17	1088.28	1144.85	1297.26	959.741	793.882	993.109	1533.93	1087.64	866.166	1135.27	1315.39	1131.74	1205.92	1279.83	1295.19	1174.71	799.476	977.985	1014.47	1089.98	933.864	1516.95	943.251	719.003	1201.55	1497.27	1336.36	1383.48	1088.34	899.963
K00461	ALOX5; arachidonate 5-lipoxygenase	0.00401787	0.00157061	0.000362778	0.00435034	0.00142927	0.00184291	0.00395726	0.0047733	0.00296069	0.00180612	0.0113592	0.011949	0.00093682	0.00438065	0.00135935	0.00275538	0.00350443	0.00157061	0.00117339	0.00249325	0.000483561	0.00078942	0.0012798	0.000422956	0.00425499	0.00311178	0.00320226	0.00229574	0.00634127	0.00570861	0.00134266	0.0010273	0.00214508	0.00114808	0.00372691	0.00054374	0.00262822	0.00178869	0.00151029	0.00326286	0.0214782	0.00367457	0.0010891	0.000906517	0.00386721
K00462	bphC; biphenyl-2,3-diol 1,2-dioxygenase	0.0740791	0.0245863	0.0132084	0.0715642	0.0281822	0.0365926	0.0594839	0.080157	0.0568787	0.0313917	0.175745	0.279144	0.0212808	0.0706043	0.0458051	0.0541691	0.080676	0.0465419	0.0239404	0.0485774	0.0247254	0.0160944	0.0231021	0.0121622	0.0725435	0.0535299	0.0659377	0.0415148	0.120523	0.0848365	0.0500309	0.0193626	0.0487194	0.0293154	0.0638389	0.028997	0.0413398	0.0352325	0.0290203	0.0722917	0.300034	0.0484737	0.0144224	0.0312039	0.0654428
K00463	IDO; indoleamine 2,3-dioxygenase	1.22024	0.395043	0.259029	1.12014	0.480901	0.617637	0.908543	1.27137	0.950829	0.53084	2.69282	4.88781	0.383459	1.10361	0.566176	0.926681	1.43185	0.848238	0.414062	0.84721	0.509524	0.312417	0.40637	0.225686	1.18654	0.866253	1.13075	0.679209	2.04393	1.33516	1.00695	0.331392	0.852795	0.523148	1.06884	0.582792	0.65961	0.606897	0.510988	1.2557	4.60829	0.783426	0.226569	0.595414	1.04247
K00464	Unclassified	1.5938	1.94091	1.37761	3.43302	0.875669	1.33228	1.2729	0.945523	1.2089	2.78761	5.26105	10.1717	2.71112	2.48782	1.885	1.77311	5.53207	0.914289	0.978023	2.49172	2.83065	3.04141	1.52521	0.789222	1.04384	5.21304	4.18029	1.19014	10.2107	7.12058	5.42825	0.85241	2.02206	0.915781	2.11106	2.13427	2.7273	0.938872	2.80015	4.35621	5.70618	3.55407	0.835718	2.01333	1.2941
K00466	iaaM; tryptophan 2-monooxygenase	155.189	87.9721	114.294	207.926	106.944	97.8292	133.205	170.386	225.217	160.733	168.391	252.904	225.568	143.885	102.341	155.275	241.124	154.204	188.654	176.725	138.275	233.604	163.7	81.7125	191.057	137.44	203.028	220.755	264.979	193.095	228.17	100.692	226.224	141.757	177.426	130.875	170.052	113.362	132.647	139.455	199.906	160.726	134.527	76.5359	204.681
K00467	E1.13.12.4; lactate 2-monooxygenase	1.84635	0.937161	1.09567	0.258526	0.752644	0.48605	0.741368	0.715302	1.20676	1.95831	0.653999	5.40593	0.662025	0.708695	0.661831	2.39969	2.38132	2.38003	0.565855	1.78735	1.89942	2.98186	1.09154	0.237566	1.82105	1.12535	2.413	0.267252	6.69803	3.63802	3.29091	0.664614	1.35679	0.583754	2.69553	1.41174	1.78306	0.935859	1.51255	1.01111	12.7442	4.7873	0.479292	0.840268	0.53998
K00469	MIOX; inositol oxygenase	49.1028	46.3917	30.1887	47.718	27.3291	34.5263	39.6991	26.1825	58.5642	42.011	29.1636	16.4222	58.8325	61.9365	55.6113	28.4113	15.4537	59.7008	31.5875	28.1966	26.7922	65.485	55.0311	34.1913	47.0364	46.542	26.1794	26.3001	32.7995	51.4456	23.9814	30.0277	16.5555	32.6381	43.5358	25.2447	34.9152	33.5935	17.6003	48.3595	75.3601	67.3693	46.6194	51.3652	52.6995
K00471	BBOX1; gamma-butyrobetaine dioxygenase	29.7058	10.6504	3.51375	20.4987	11.8513	17.3705	17.2475	25.3263	16.3931	18.6454	52.091	78.1178	8.83076	24.6435	8.80131	18.2088	22.6699	25.4689	7.98784	14.3053	6.70104	5.88889	6.42434	3.72934	21.47	18.3634	18.3933	12.4539	34.0356	24.9608	23.3206	20.7786	13.4549	8.00866	30.43	11.1204	15.0294	9.7801	8.04734	26.562	104.503	22.5736	4.18698	8.3313	18.6773
K00472	P4HA; prolyl 4-hydroxylase	0.537337	0.241983	0.261718	0.0685142	0.178356	0.154861	0.173532	0.186762	0.26454	1.13213	0.309536	0.833521	0.351651	0.233574	0.286931	0.432405	0.603719	0.230926	0.119497	0.313996	0.407531	0.515076	0.201892	0.282933	0.134356	0.430221	0.462903	0.243492	0.756279	2.47353	0.478074	0.335775	0.254641	0.232857	0.355737	0.269516	0.615449	0.181148	0.226796	0.343902	0.496499	0.4222	0.234197	0.267445	0.184873
K00473	PLOD1; procollagen-lysine,2-oxoglutarate 5-dioxygenase 1	15.8855	9.8298	36.9301	11.5595	17.0065	18.4843	9.57343	10.3963	34.7588	10.7263	19.9073	62.7442	72.0273	14.4742	14.7356	25.3371	56.4877	7.0859	24.2374	30.9888	27.4408	64.6068	15.4295	8.78178	12.1249	33.1722	53.5392	13.342	35.4672	13.0615	33.4574	80.2303	22.5454	17.5418	51.8462	25.9012	46.3567	80.9394	46.1151	66.5632	5.44183	6.09475	5.30299	28.8246	17.9725
K00474	TMLHE; trimethyllysine dioxygenase	0.0945091	0.00290714	0.000143372	0.00171929	0.0025387	0.00530118	0.00156394	0.0579364	0.110414	0.00064467	0.00534751	0.00551467	0.0564202	0.00173126	0.000537225	0.00302819	0.0669629	0.00890814	0.00130002	0.0774295	0.065769	0.0666273	0.00042978	0.000167155	0.00156411	0.00323128	0.00126556	0.000907294	0.0680016	0.00206557	0.00696834	0.112221	0.000847753	0.000453732	0.00932791	0.00250131	0.00304017	0.00064467	0.000525418	0.00128951	0.0180496	0.00113433	0.000382045	0.000358262	0.00152835
K00475	F3H; naringenin 3-dioxygenase	1.18766e-15	4.64264e-16	1.07235e-16	1.28594e-15	4.01815e-16	5.44753e-16	1.16974e-15	1.41096e-15	8.75163e-16	4.82178e-16	3.35771e-15	3.48274e-15	2.76918e-16	1.29489e-15	4.01815e-16	7.67928e-16	1.03589e-15	4.64264e-16	3.3041e-16	6.69776e-16	1.42938e-16	1.42938e-16	3.21452e-16	1.25023e-16	1.16987e-15	9.19823e-16	9.46568e-16	6.78607e-16	1.81277e-15	1.54494e-15	2.94707e-16	3.03664e-16	6.34073e-16	3.39367e-16	9.91355e-16	1.60726e-16	7.76885e-16	4.82178e-16	3.92984e-16	9.64483e-16	5.80456e-15	8.48417e-16	2.85749e-16	2.67961e-16	1.14312e-15
K00476	ASPH; aspartate beta-hydroxylase	1.02243	0.359716	0.138954	0.979054	0.34848	0.462299	0.860492	1.12608	0.802805	0.402437	2.48868	3.20754	0.297396	0.979764	0.383685	0.664611	1.00336	0.483643	0.290591	0.647511	0.278815	0.230465	0.287103	0.131509	0.939124	0.725172	0.81957	0.546981	1.57433	1.1722	0.452932	0.333422	0.575446	0.326561	0.81947	0.257776	0.594771	0.425059	0.352527	0.862064	4.27795	0.656036	0.215003	0.316908	0.885614
K00477	PHYH; phytanoyl-CoA hydroxylase	120.635	2.73821	81.8791	17.3312	2.27599	21.62	0.338426	1.80802	80.864	40.0328	37.0337	9.96557	2.07786	36.1928	53.0415	6.84356	1.05678	23.1225	47.4548	23.2268	0.436912	102.951	0.16979	0.286492	49.9676	83.0646	22.697	52.2089	43.741	43.4961	7.42174	8.1891	0.246883	17.6848	50.262	2.07308	69.991	36.1669	13.65	41.8474	49.5865	102.135	85.6666	45.0192	32.3245
K00479	Unclassified	62.8137	22.487	7.75882	60.5171	22.851	30.995	52.9512	68.5261	49.1616	29.3408	158.007	221.928	17.2183	66.2661	24.2895	46.8645	58.5145	33.6133	18.0488	37.3931	13.9943	11.2693	19.2901	8.23695	58.7341	53.4426	68.0813	33.9735	96.6465	77.8451	29.6894	23.5375	34.8772	19.8816	53.816	16.1905	36.8574	25.8565	21.1996	55.6433	276.347	46.9231	12.9092	21.2968	55.231
K00480	E1.14.13.1; salicylate hydroxylase	10.2828	4.90744	7.76797	2.9411	5.02674	7.19198	2.40171	4.47977	12.5826	7.71945	7.55951	46.4823	9.44283	4.38926	11.9772	13.1462	12.8084	10.527	2.98165	6.81356	10.0908	14.8758	7.56622	8.02136	7.13392	7.89626	17.3667	2.93753	17.877	9.15637	18.9856	8.57974	8.62435	2.92841	12.1901	7.17596	7.05119	5.05264	5.80281	12.1486	31.0823	15.4972	1.51271	6.91312	3.17279
K00481	pobA; p-hydroxybenzoate 3-monooxygenase	24.4197	9.99519	4.83653	22.0259	9.11558	11.4505	20.4208	25.3472	18.2524	10.9328	56.6384	85.7868	8.39239	23.094	11.1978	20.0805	26.4108	12.1878	7.5137	15.8734	8.73783	6.58034	8.10793	4.60042	22.1604	18.7478	25.34	13.8999	40.2025	31.3548	14.2598	7.67884	15.6068	8.60304	20.7952	8.13559	17.1394	10.5709	9.98095	21.9705	98.5681	16.569	6.0368	10.9482	20.9646
K00483	hpaB; 4-hydroxyphenylacetate 3-monooxygenase	332.604	383.268	321.86	416.561	309.04	260.837	289.653	480.392	519.307	387.831	533.613	874.748	309.716	331.696	371.185	490.263	725.774	360.532	290.097	389.3	430.371	397.791	360.586	312.909	319.039	480.911	589.171	406.816	599.54	379.643	698.134	226.511	657.775	370.844	382.804	453.598	477.967	253.221	320.191	481.341	504.839	311.686	392.046	481.268	348.059
K00484	hpaC; flavin reductase (NADH)	1.48011	1.00906	0.636176	1.40121	3.05553	0.676233	1.65845	1.57417	1.06455	0.63476	3.8358	4.79232	1.8385	1.40952	1.882	1.61972	2.66237	0.920829	0.451105	2.28156	0.776794	1.03089	0.439151	1.37157	4.6894	1.19884	2.15437	2.70854	4.8318	3.42207	0.757339	0.337945	1.18698	1.31917	1.6025	0.63136	1.71966	0.53978	0.752439	1.06956	11.4318	1.09591	0.314533	0.471804	24.6964
K00485	FMO; dimethylaniline monooxygenase (N-oxide forming) / hypotaurine monooxygenase	43.7222	28.9209	27.4373	45.1499	17.6329	27.7365	33.5571	20.8824	54.4048	36.5661	10.765	14.3776	55.0317	47.8499	46.3825	17.069	11.52	38.9833	27.0271	22.3895	20.4081	51.3334	49.3847	31.7151	36.219	15.0417	10.8973	25.8851	20.1238	21.2944	18.7801	25.7591	11.6291	28.6516	37.3704	20.1459	23.6802	29.9883	13.8688	37.7571	38.3365	22.3347	41.7375	42.983	45.1521
K00486	KMO; kynurenine 3-monooxygenase	146.36	158.579	85.5696	135.304	93.6321	102.63	121.61	81.4339	167.86	122.581	100.486	56.4059	167.507	177.884	158.759	103.629	51.4989	110.547	96.7242	85.7051	89.1075	208.381	156.212	99.3929	118.634	138.615	84.7819	74.8032	97.7136	99.2039	73.6178	89.1508	55.628	95.9218	129.478	81.6933	118.671	96.3347	67.0463	133.629	173.752	113.525	132.727	142.151	152.44
K00489	CYP7A1; cholesterol 7alpha-monooxygenase	0.000462724	0.000180882	4.17798e-05	0.000501014	0.000156551	0.000212241	0.000455744	0.000549724	0.000340972	0.000187862	0.0013082	0.00135691	0.00010789	0.000504503	0.000156551	0.000299193	0.000403593	0.000180882	0.000128731	0.000260952	5.569e-05	5.569e-05	0.000125241	4.87103e-05	0.000455793	0.000358372	0.000368793	0.000264392	0.000706275	0.000601924	0.000114821	0.000118311	0.000247042	0.000132221	0.000386242	6.26205e-05	0.000302682	0.000187862	0.000153111	0.000375772	0.00226152	0.000330552	0.000111331	0.0001044	0.000445373
K00491	nos; nitric-oxide synthase, bacterial	28.8783	15.7602	8.99741	23.1065	11.2202	13.7306	24.2765	27.0754	21.0378	14.9778	61.7649	89.3176	12.1359	26.5869	15.4559	22.6764	36.4365	17.6314	9.68963	19.4076	14.8636	8.43777	13.2991	7.04438	24.9543	25.2632	46.4218	16.9366	54.2554	48.9489	22.0104	9.85609	19.5394	10.9597	26.172	12.4713	25.9395	12.6714	13.8502	28.5744	109.649	26.0528	9.05329	29.0464	24.0724
K00493	Unclassified	2.04375	0.839847	1.25827	2.31749	1.01517	1.17123	0.74179	1.36727	1.78623	1.6428	3.3853	25.8484	1.61849	1.54675	1.56761	5.69516	4.51114	2.51611	0.916423	2.20047	2.54788	2.33706	0.963034	0.662561	1.6082	2.77511	9.05417	0.968815	8.11763	3.89891	4.75726	0.792823	2.23116	1.3527	2.07628	2.48242	1.34773	1.20375	1.86891	3.46504	3.84588	2.16863	0.195054	2.0306	1.19311
K00494	luxA; alkanal monooxygenase alpha chain	0.000289711	8.06762e-05	7.47364e-05	0.000249271	0.000121259	0.000152362	0.000184919	0.00028569	0.000230554	0.000127427	0.000568047	0.00131086	9.74155e-05	0.000240142	0.000148033	0.000234044	0.000372376	0.000244266	0.00010542	0.000214053	0.000152665	8.83565e-05	0.000101152	6.3013e-05	0.000282197	0.000195741	0.000282285	0.00015948	0.000497732	0.000290972	0.000307703	7.72172e-05	0.000222995	0.000143491	0.000256758	0.000180565	0.000136475	0.000156045	0.000129454	0.000325673	0.000953821	0.000173835	4.4364e-05	0.00017333	0.000235196
K00496	alkB1_2; alkane 1-monooxygenase	623.37	89.7111	428.765	189.743	55.9379	152.12	95.415	71.1239	495.212	230.14	244.784	124.42	124.466	272.258	349.612	84.8207	45.6741	92.4973	276.65	163.969	54.3649	576.664	116.941	71.9813	300.177	414.57	157.411	296.688	266.19	195.159	51.0276	64.9397	40.6313	149.431	293.903	51.9582	380.477	235.795	99.7417	255.505	229.915	406.101	481.251	304.577	262.78
K00499	CMO; choline monooxygenase	573.991	65.5907	400.804	127.714	41.4025	126.25	49.271	39.2265	428.913	188.915	191.935	75.0016	68.7058	197.196	296.122	69.3205	26.7379	58.3289	247.537	137.233	36.5419	538.297	63.4547	40.2475	251.56	373.466	123.067	261.759	220.867	145.589	46.5524	41.0688	25.9402	117.71	262.342	37.1482	360.159	201.603	83.3421	209.514	126.607	372.279	436.001	248.42	203.692
K00500	phhA; phenylalanine-4-hydroxylase	626.84	196.923	428.03	282.929	121.831	218.626	184.999	120.831	561.489	309.538	244.326	127.558	279.758	390.193	442.26	147.613	76.8319	206.329	311.331	210.574	126.836	653.274	259.047	166.734	355.996	441.341	187.171	310.67	294.436	245.118	119.722	146.841	77.9672	212.617	367.016	118.36	390.695	285.853	141.999	332.157	339.845	437.226	514.001	391.188	353.082
K00501	TH; tyrosine 3-monooxygenase	0.00608184	0.00237743	0.000549136	0.00658511	0.00205764	0.00278961	0.0059901	0.00722533	0.00448159	0.00246917	0.0171944	0.0178346	0.00141806	0.00663098	0.00205764	0.00393246	0.00530465	0.00237743	0.00169198	0.00342984	0.000731966	0.000731966	0.00164612	0.000640228	0.00599075	0.00471029	0.00484725	0.00347506	0.00928298	0.00791143	0.00150915	0.00155502	0.00324701	0.00173785	0.0050766	0.000823058	0.00397833	0.00246917	0.00201242	0.00493899	0.0297244	0.00434463	0.00146329	0.00137219	0.00585379
K00503	DBH; dopamine beta-monooxygenase	7.64763e-07	2.98951e-07	6.90513e-08	8.28046e-07	2.58739e-07	3.5078e-07	7.53227e-07	9.08552e-07	5.6354e-07	3.10487e-07	2.16212e-06	2.24262e-06	1.78315e-07	8.33814e-07	2.58739e-07	4.94488e-07	6.67035e-07	2.98951e-07	2.12759e-07	4.31286e-07	9.20413e-08	9.20413e-08	2.06991e-07	8.05056e-08	7.53309e-07	5.92297e-07	6.0952e-07	4.36973e-07	1.16729e-06	9.94826e-07	1.89769e-07	1.95537e-07	4.08296e-07	2.18527e-07	6.38359e-07	1.03496e-07	5.00256e-07	3.10487e-07	2.53053e-07	6.21055e-07	3.7377e-06	5.46317e-07	1.84001e-07	1.72547e-07	7.36086e-07
K00504	Unclassified	0.0162772	0.074401	0.03396	0.00402007	0.0111124	0.00800371	0.00971267	0.0101046	0.0143507	0.0221591	0.0125251	0.0592125	0.0143631	0.00884439	0.0132215	0.0233849	0.0352832	1.61018	0.0108434	0.0333756	0.0232842	0.0535754	0.0238996	0.00550827	0.47429	0.219502	0.022445	0.00875178	0.114817	1.53721	0.0501288	0.0118026	0.0144948	0.00650008	0.0405706	0.0148965	0.0194389	0.0174368	0.0245174	0.381448	1.16246	2.47608	0.0143807	0.0129539	0.00964099
K00505	TYR; tyrosinase	8.61243	19.3158	9.33955	5.37469	12.9497	7.23418	7.36509	6.82546	10.7191	7.9543	16.3748	16.1734	8.35833	5.74403	14.3404	14.924	9.36686	7.09305	6.44815	7.84841	10.8215	24.4672	9.22598	7.70688	12.5471	12.5571	8.70912	2.01653	12.129	11.6128	12.1029	7.99094	9.51664	5.90284	9.49357	12.0153	12.8846	6.42234	10.2409	13.2309	13.6049	15.8814	5.15821	3.681	9.39436
K00507	SCD; stearoyl-CoA desaturase (Delta-9 desaturase)	129.973	98.9269	125.08	114.944	54.2096	77.8271	106.369	114.586	213.157	135.053	97.6087	116.161	233.823	171.805	134.714	77.6071	55.1593	174.982	90.3603	71.5239	67.4461	232.452	144.819	110.249	114.986	102.903	79.6632	103.556	117.492	196.308	80.6859	95.4153	48.3735	79.8441	115.586	82.5251	113.729	81.4195	63.7917	133.847	290.589	191.244	139.775	116.996	129.373
K00508	E1.14.19.3; linoleoyl-CoA desaturase	425.052	591.506	251.508	346.832	360.626	282.037	342.861	249.524	435.516	315.194	318.472	252.59	414.104	406.149	378.011	283.743	182.187	275.348	264.278	262.119	244.151	593.955	409.221	231.843	332.67	240.291	175.898	202.291	238.755	241.562	187.906	274.464	162.343	281.071	339.69	213.806	329.998	258.999	154.91	353.628	529.108	269.173	375.668	320.424	407.046
K00510	HMOX1; heme oxygenase 1	72.844	48.0248	40.1851	75.3286	32.3667	50.4699	57.5814	50.8272	87.968	53.4947	76.899	111.62	73.8519	81.3437	69.8126	41.0852	53.3635	55.2435	42.4467	45.467	43.5543	65.9576	91.2301	46.0679	64.7815	54.0454	50.951	47.7474	82.6514	61.7001	41.322	38.4588	29.2625	40.9374	66.2059	34.4157	44.5111	53.4429	32.0441	68.1055	142.448	45.1459	53.4439	74.4971	74.2971
K00511	SQLE; squalene monooxygenase	43.7173	28.919	27.4369	45.8054	17.6343	27.7343	33.5522	20.8766	54.4012	36.8719	11.5923	15.1523	55.2714	48.1447	46.3808	17.0727	11.7565	38.9814	27.0282	22.5165	20.4075	51.8278	49.3918	31.7146	36.2271	15.7592	11.1342	25.8824	21.2679	22.6318	19.1547	25.7578	11.6265	28.6502	37.3827	20.1453	23.677	29.9932	14.1159	38.1138	38.9945	22.9677	41.7417	42.9819	45.1474
K00514	ZDS; zeta-carotene desaturase	11.6726	28.3122	19.6314	65.262	13.547	29.7598	47.6476	24.3131	57.6105	28.9169	18.943	33.0015	76.0154	31.5896	58.8684	12.2277	17.4325	26.5463	2.29543	43.4956	49.9662	94.4385	19.8745	41.0818	50.4979	16.6979	5.70803	34.668	28.7613	39.6408	23.7068	38.5479	20.7609	77.5061	50.0864	39.3514	23.2467	65.2188	20.5254	11.4394	69.6039	54.2492	99.1968	40.9176	79.3684
K00515	BCMO1; beta-carotene 15,15'-dioxygenase	5.67715e-05	2.88673e-05	9.62738e-06	4.43503e-05	2.76924e-05	2.57143e-05	4.52931e-05	5.1636e-05	3.9086e-05	2.55325e-05	0.00012273	0.00013395	1.45006e-05	4.46593e-05	2.27608e-05	4.52692e-05	9.799e-05	2.39172e-05	1.13954e-05	2.80498e-05	8.8824e-06	4.92975e-06	1.80129e-05	4.3119e-06	4.23237e-05	3.66736e-05	5.73593e-05	2.34043e-05	7.33994e-05	5.32831e-05	1.51141e-05	1.0473e-05	3.27475e-05	2.1586e-05	4.40723e-05	2.23513e-05	5.05097e-05	1.66297e-05	2.14589e-05	3.32638e-05	0.000200192	0.000307155	9.85515e-06	2.40733e-05	4.93066e-05
K00517	Unclassified	227.918	250.396	146.57	186.977	265.577	112.602	245.175	205.281	799.274	269.906	327.814	606.965	339.387	481.443	411.685	174.476	321.913	172.651	282.006	416.271	350.615	178.871	311.908	222.178	177.398	193.438	289.852	155.079	981.867	313.673	176.884	152.564	177.818	434.896	179.408	389.564	141.378	270.715	111.255	253.108	350.861	160.364	122.104	263.054	630.005
K00518	Unclassified	33.9863	15.8147	10.2194	30.3334	13.4532	14.7596	27.4078	32.4516	25.8308	13.4484	73.2683	115.244	15.8909	31.746	14.1019	28.024	33.9706	28.0479	13.8931	19.8985	16.5396	31.1305	10.9869	8.68442	30.906	26.1466	29.0456	21.8072	54.3157	42.6667	21.7772	10.9401	19.6976	11.5259	31.4834	14.8502	17.913	15.0678	30.3968	34.7759	141.508	26.4086	14.3373	14.3617	25.7076
K00520	Unclassified	167.057	215.972	356.223	178.787	91.7763	138.497	258.177	334.924	562.713	209.431	222.813	314.801	497.828	310.17	230.005	268.959	448.856	208.269	262.129	223.298	187.463	197.522	282.361	237.262	104.925	216.878	308.369	307.746	306.414	411.661	382.679	254.636	142.049	133.104	224.282	356.156	379.756	170.645	109.923	212.665	249.903	287.184	205.314	168.409	187.546
K00522	FTH1; ferritin heavy chain	2.08496e-17	8.15027e-18	1.88254e-18	2.25749e-17	7.05397e-18	9.56328e-18	2.05351e-17	2.47697e-17	1.53637e-17	8.46477e-18	5.89455e-17	6.11403e-17	4.86137e-18	2.27322e-17	7.05397e-18	1.34812e-17	1.81853e-17	8.15027e-18	5.80043e-18	1.17581e-17	2.50931e-18	2.50931e-18	5.64318e-18	2.19482e-18	2.05374e-17	1.61477e-17	1.66173e-17	1.19131e-17	3.18237e-17	2.71218e-17	5.17365e-18	5.3309e-18	1.11313e-17	5.95767e-18	1.74035e-17	2.82159e-18	1.36384e-17	8.46477e-18	6.89894e-18	1.69317e-17	1.01901e-16	1.48942e-17	5.0164e-18	4.70412e-18	2.00678e-17
K00523	ascD; CDP-4-dehydro-6-deoxyglucose reductase, E3	59.7866	41.6992	118.197	59.6326	50.1574	58.0319	72.1573	134.353	204.948	71.551	150.904	104.273	177.703	140.755	64.7277	72.75	40.9595	171.348	63.2378	41.4276	57.0412	81.1101	99.3575	87.3149	61.6879	101.895	92.1873	118.394	94.1999	193.91	62.9565	76.8372	40.0137	84.5743	88.8133	54.0109	134.701	72.9259	54.0696	86.7304	261.348	134.694	65.669	51.3267	68.9424
K00524	nrdJ; ribonucleotide reductase, class II	1.56167	1.97612	1.39568	4.85077	0.869872	1.31435	1.26395	0.89093	1.15995	3.43148	7.04473	11.718	3.24171	3.13189	1.8553	1.73848	6.08273	0.865474	0.978866	2.74155	2.84856	3.96493	1.52291	0.777742	1.0054	6.79831	4.72987	1.18139	12.7544	9.99185	6.21202	0.858312	2.01206	0.89607	2.07948	2.1234	2.70669	0.915692	3.32616	5.13557	6.88991	4.85148	0.840694	2.01253	1.25665
K00525	E1.17.4.1A; ribonucleoside-diphosphate reductase alpha chain	17618.1	17670.3	12936.8	15566.4	13069.9	12584.4	14077.7	16469.6	21404.3	14657.5	17532.9	14597.8	18009.1	15409.7	16641.6	17717.7	17735.3	13294.8	15022.6	13432.4	15649.2	15087.5	16221.2	13975.3	14715.3	14668.7	15177.1	16762.5	18327	17232.4	15462.3	17238	13810.6	14228.7	15018	12028	15270.8	15423.7	10698.5	15571.9	14697.3	13679.6	16544.1	15289.6	17660.3
K00526	E1.17.4.1B; ribonucleoside-diphosphate reductase beta chain	5986.96	5096.89	4542.69	4858.27	4479.9	5252.64	4626.1	5704.78	8632.28	4453.2	6055.6	6177.99	6241.74	4965.01	5792.44	6377.26	7886.85	4421.84	4913.42	5004.07	6148.69	5084.07	6095.94	5250.36	4500.17	5059.71	6526.67	5354.4	7518.05	5886.93	6376.48	5906.93	5254.97	6939.15	6099.07	5000.78	5271.75	5873.03	4187.69	6754.86	4678.31	4376.67	5654.15	5724.05	5906.66
K00527	rtpR; ribonucleoside-triphosphate reductase (thioredoxin)	25288	27141.2	21854.6	23083.1	21840.3	21101.2	21767.7	26606.9	33591.3	21348.3	26511	31199	26032	23680.3	26263.6	28732.8	34437.2	22532.7	24110.8	21345	26625.8	23389.4	25676.8	21939.6	22107.6	24738.2	27724	26241	30570.7	27130.2	30034	26181.1	25748.5	24194.4	25015.1	21590.8	24853.8	23611.9	18342.2	25984	23170.1	20724.5	25221	24255	24562.4
K00528	Unclassified	10552.4	13178.2	11276.8	10047.5	10821.1	9619.23	9882.97	13000.5	15548.5	9802.06	12542.3	15744.4	12224.8	10200.7	12080.5	13604.1	16947.7	10813.5	11471.3	10174.8	12603.4	11861.9	12136.5	10920.1	9743.48	12307.4	13389.9	12079.2	13658.4	12335.1	15306.6	12377.4	12863.1	9881.3	12425.1	10389.5	12658.5	10710.8	8877.08	11939.8	10685.9	9826.26	11779	11084.7	10581.3
K00529	hcaD; 3-phenylpropionate/trans-cinnamate dioxygenase ferredoxin reductase component	123.777	85.456	123.767	108.467	97.3258	91.602	90.1005	93.8557	165.972	88.6228	88.0163	165.252	139.495	111.269	137.13	113.806	243.59	103.223	118.665	78.5865	128.016	100.173	113.612	107.544	99.0944	79.7769	112.108	113.916	118.552	91.2875	192.149	94.8959	114.392	81.8341	99.4314	99.699	69.5004	90.5457	72.0821	107.302	156.442	90.4569	74.8723	120.015	95.4078
K00531	anfG; nitrogenase delta subunit	241.56	126.674	138.804	186.643	116.238	85.9707	56.3308	266.415	307.51	176.814	181.92	196.799	73.4892	160.801	192.913	129.401	184.289	115.581	82.1712	161.959	190.272	162.812	206.862	106.38	166.011	152.1	146.608	196.373	207.169	180.844	222.059	96.8015	267.982	97.0111	216.101	123.026	168.144	82.9643	115.317	122.463	333.2	121.165	144.136	132.968	127.334
K00532	Unclassified	1678.39	2406.52	2236.25	1994.89	2327.63	1356.33	2211.29	2742.46	3335.1	2068.25	2568.65	3140.89	2414.32	1904.22	2414.9	2955.53	3293.82	2224.39	2352.02	2145.22	2745.47	2307.79	2711.6	1988.02	1706.25	2020.14	2575.24	2222.53	2325.06	1948.55	3332.3	2019.62	2626.4	2225.5	2018.89	2349.28	2328.59	2029.19	1658.69	2450.94	1663.58	1876.02	1967.93	2116.72	1981.45
K00533	Unclassified	1446.18	1638.48	1458.4	1304.33	1228.47	1504.38	1486.38	1258.26	1780.14	1168.62	1552.6	2876.8	1493.36	1546.38	1705.58	1684.87	3053.84	1695.71	1438.95	1116.97	1583.69	1441.83	1568.87	1333.55	1199.57	1765.85	2107.08	1771.6	2236.79	1664.52	2150.25	1296.26	1574.03	1280.82	1656.22	1504.75	1500.02	1292.94	1113.5	1613.73	1624.03	1224.42	1627.64	1477.22	1285.2
K00534	Unclassified	168.405	347.149	166.927	202.861	89.4907	263.873	249.878	156.687	182.446	102.735	158.723	156.92	133.532	277.393	261.716	205.676	126.832	294.244	171.113	65.1594	128.264	203.412	193.55	178.571	128.956	278.822	150.621	218.658	182.142	200.776	207.214	179.432	24.4044	138.582	150.02	134.247	279.633	141.356	101.417	155.509	290.179	229.422	257.959	103.164	163.617
K00537	Unclassified	9877.01	11061.7	9478.03	8356.08	8844.88	8554.11	8109.77	10483.7	14233.7	8338.48	10814.1	13995.8	10141	9637.11	10853	11802.1	14936.5	10141.6	9641.89	9250.14	11162.1	10104.3	10654.5	8520.48	8388.95	10457.4	12377.2	10184.8	13415.4	12343.9	13510	9917.99	11734.1	9857.86	10868.1	9112.71	10881.9	9261.56	8446.41	11128.8	11051.3	8465.87	10164.7	9989.41	9745.16
K00542	GAMT; guanidinoacetate N-methyltransferase	0.132542	0.00059682	0.898641	0.0489795	0.00398412	0.00458792	0.0952605	0.00454292	0.0976343	0.00356514	1.36436	0.188837	0.0682633	0.0939055	0.00818348	0.13317	0.014293	1.45247	0.110063	0.00744803	0.0961996	1.89268	0.00347051	0.0941643	1.35268	1.82341	0.0471511	0.136663	0.0792338	0.0491036	0.0176707	0.00203768	0.00841609	0.00613097	0.155195	1.82271	0.00109802	0.0359001	2.16269	0.080295	0.243212	0.0674788	1.43531e-05	0.0430644	0.00393237
K00543	ASMT; acetylserotonin O-methyltransferase	0.0094077	0.0639675	0.0250168	0.0101862	0.00318287	0.00431511	0.00926579	0.0111765	0.00693236	0.00381944	0.0265972	0.0275875	0.00219353	0.0102571	0.00318287	0.00608292	0.0082055	1.60747	0.00261725	0.00530545	0.00113224	0.0252997	0.00254629	0.000990336	0.455464	0.212323	0.00749798	0.0053754	0.0746494	2.95969	0.00233444	0.00240539	0.00502263	0.0026882	0.00785274	0.00127315	0.00615388	0.00381944	0.00311291	0.36938	1.05895	2.42177	0.00226348	0.00212258	0.00905493
K00544	BHMT; betaine-homocysteine S-methyltransferase	9.55158	3.81238	1.60856	4.15697	3.75934	6.89305	3.7896	6.1551	5.11261	2.10544	12.2531	12.17	3.48143	4.19245	3.36902	4.94991	3.57611	9.82368	1.93756	2.40127	1.21177	4.19404	2.21183	2.10703	4.67947	4.99765	3.08644	2.20272	6.6259	5.00018	8.65441	4.77484	2.78102	1.10446	12.0536	2.83352	4.81035	2.19036	1.6425	4.1222	31.0588	5.24403	0.930776	0.882715	3.70357
K00545	COMT; catechol O-methyltransferase	0.0708526	0.00804212	0.0357089	0.0378497	0.0379954	0.0442512	0.00919033	0.0488809	0.0625106	0.0346831	0.048853	0.486113	0.0345408	0.031557	0.0573771	0.0740028	0.134016	0.106751	0.0346888	0.0705318	0.0796052	0.040802	0.0328973	0.0270781	0.0678757	0.0375958	0.0874745	0.0368299	0.141654	0.0403406	0.159869	0.0200123	0.0790524	0.0568762	0.0681514	0.0948826	0.0143468	0.0519505	0.0437129	0.112086	0.0674519	0.0306281	0.00175712	0.0811308	0.0418571
K00547	mmuM; homocysteine S-methyltransferase	3335.92	2859.57	2508.7	2539.36	2689.69	2554.79	2187.61	3153.68	4136.34	2605.31	3072.04	5148.14	2876.17	2800.24	3037.05	3454.12	5391.79	2596.01	2663.08	2916.07	3744.07	2831.63	3192.65	2188.7	2475.03	3181.87	3998.59	3176.45	5263.12	3278.15	4142.38	2515.49	4277.3	3701.35	2983.86	3034.98	3235.48	2651.76	2772.4	3894.92	3424.14	2332.11	2635.83	3069.32	2886.7
K00548	metH; 5-methyltetrahydrofolate--homocysteine methyltransferase	20304.6	23508.5	18032.4	19265.5	17350.4	16114.6	17670.7	21441.1	26148.1	18284.1	22126.7	24762.8	21739.7	19227.3	21470	23293.2	26540.9	18343.7	19856	17130	20518.4	20211	20322.4	18112	18173.1	20636.1	21559.4	21493	23194.2	22516.3	23408.1	20929.8	20605	16717.9	19617.9	16787.4	20643.8	18776	14194.4	19774.8	20121.6	17207.8	20916.1	19685.2	19995.7
K00549	metE; 5-methyltetrahydropteroyltriglutamate--homocysteine methyltransferase	3528.28	3785.19	2770.97	3072.88	2554.55	3355.88	2309.34	3316.02	4878.83	2396.92	3660.56	3229.44	3727.63	3132.83	3633.41	3345.82	4017.32	3009.88	2709.72	2723.83	3206.07	3214.91	3364.83	3404.17	2845.43	2752.15	3310.65	3105.37	4125.22	3999.94	3692.66	4169.38	2670.55	3033.36	4553.23	2558.88	3009.44	3420.84	2593.14	3081.26	3533.75	2752.95	3838.62	3070.11	3751.98
K00553	PNMT; phenylethanolamine N-methyltransferase	0.000100833	3.94163e-05	9.1043e-06	0.000109177	3.41144e-05	4.62499e-05	9.93119e-05	0.000119791	7.43018e-05	4.09372e-05	0.000285072	0.000295686	2.35105e-05	0.000109937	3.41144e-05	6.51975e-05	8.79476e-05	3.94163e-05	2.8052e-05	5.68644e-05	1.21355e-05	1.21355e-05	2.72915e-05	1.06145e-05	9.93226e-05	7.80935e-05	8.03642e-05	5.76142e-05	0.000153906	0.000131166	2.50208e-05	2.57812e-05	5.38332e-05	2.88124e-05	8.41666e-05	1.36457e-05	6.5958e-05	4.09372e-05	3.33646e-05	8.18852e-05	0.000492811	7.20311e-05	2.42603e-05	2.275e-05	9.70519e-05
K00554	Unclassified	19166.6	20811.8	15968.9	17275	15983.9	15368.3	16202.6	19700.3	25252.3	16236.5	19663.1	19996	19569.5	17780.7	19587.3	21040	22479.8	16322.2	18056.3	15610.6	19182.2	17354.2	18728.9	16641.5	16517.9	17710	19073.6	19075.4	21578.6	20087.3	20677.6	19907.2	17659.3	17004.4	17314.5	14845.2	18109.7	17545	12864.3	18101.9	17232.8	15621.3	19042.5	18016.7	19204.9
K00555	Unclassified	34.4544	65.9874	0.507116	11.4012	82.2355	89.0188	30.8484	65.7464	0.727059	41.6984	22.1608	4.3053	14.0811	6.42667	0.768076	42.8415	7.17388	1.65093	0.770561	36.9325	4.71236	2.85714	46.2692	0.222253	20.6808	15.2046	2.04616	2.32112	4.33083	17.0422	59.1043	32.3399	37.8253	0.541775	11.0772	0.954555	1.94953	0.472519	1.16021	1.59703	4.96087	2.22285	9.34083	25.1	0.845811
K00556	Unclassified	1202.96	1205.61	867.015	559.106	730.707	678.187	696.807	592.142	1048.77	684.655	792.79	386.739	633.014	906.833	947.831	641.254	459.831	672.263	797.686	594.521	554.138	1490.12	616.173	437.805	824.889	1155.74	523.87	752.452	713.519	723.417	469.008	639.176	315.622	785.015	863.733	456.731	1078.27	655.044	453.996	817.255	848.986	998.518	1220.82	772.876	923.239
K00557	Unclassified	192.47	283.376	92.4042	223.173	347.865	223.281	274.202	421.186	556.56	265.216	236.058	694.776	263.589	530.014	656.66	170.665	720.929	184.859	257.374	563.233	697.282	133.735	283.192	178.054	201.439	241.329	436.659	143.747	1630.64	419.786	615.36	453.941	635.683	472.824	307.639	580.911	266.705	203.668	252.21	684.89	185.195	326.701	69.7366	344.248	862.598
K00558	DNMT1; DNA (cytosine-5)-methyltransferase 1	34699.8	40893.2	32432	34392	31504.1	28840.6	30467.7	37814.4	47990.6	30500.1	37902.8	40546.3	38219.7	33758.6	38890.2	42177.5	45274.4	31633.8	35445.2	31222.1	36648	34261.5	37448.1	33749.9	30853.9	33253.5	37617	37493.4	37739.1	38840.6	42881.2	38942.2	34995.4	30680.4	35308.9	30851.7	36688.9	33352.2	24095.4	34440.5	30578.9	29756.5	38028.4	33267.6	35047.2
K00559	SMT1; sterol 24-C-methyltransferase	36.7341	13.2975	9.03494	34.8832	10.5629	18.6915	34.3742	29.9703	30.6064	20.9052	72.5706	59.0829	17.7601	34.7196	18.9842	23.0152	19.1143	12.0732	21.657	19.4903	12.5159	15.164	17.6774	10.2061	30.6691	26.2117	26.3376	21.8105	46.1887	33.0391	10.1317	13.3999	16.3528	10.573	27.557	11.1019	21.4165	22.0401	13.5051	25.9189	96.7673	25.5921	18.4777	17.613	27.9224
K00560	thyA; thymidylate synthase	18218.8	18826.1	12792.2	15803.5	13172.1	12741.8	13140.1	16255	20955	14664.2	17076.1	12429.3	18048.1	15546.8	16477	17524.8	16928.1	12500.8	14547.5	13139.7	15352.8	14905.6	16151	13610.6	15306.9	13306.3	14403.9	16851.5	16931.9	16960.9	14316.5	18175.7	13246.5	13837.4	14060	11779	14764.3	14948.1	9980.25	14604.5	13216.6	13856.3	16749.9	15373.6	18108.1
K00561	Unclassified	4743.8	5630.32	3777.43	4434.81	4144.72	3679.74	4705.91	5139.42	6423.19	4179.09	4403.73	3399.51	4723.84	4621	4929.38	5406.51	3545.03	4105.07	5493.14	3532.36	4772.2	4045.97	4111.76	4734.7	3825.4	4365.67	3901.72	4968.34	4403.07	4259.62	3878.9	5270.62	3450.04	4791.19	3230.33	2978.96	3699.11	4862.04	2815.69	3820.23	3435.48	3898.88	5363.28	4323.85	5015.15
K00562	INMT; methyltransferase	0.000114991	4.4951e-05	1.03827e-05	0.000124507	3.89046e-05	5.27441e-05	0.000113257	0.000136612	8.4735e-05	4.66855e-05	0.000325101	0.000337206	2.68118e-05	0.000125374	3.89046e-05	7.43523e-05	0.000100297	4.4951e-05	3.19909e-05	6.48491e-05	1.38395e-05	1.38395e-05	3.11237e-05	1.2105e-05	0.000113269	8.90591e-05	9.16487e-05	6.57041e-05	0.000175516	0.000149584	2.85341e-05	2.94014e-05	6.13923e-05	3.28582e-05	9.5985e-05	1.55618e-05	7.52196e-05	4.66855e-05	3.80495e-05	9.33832e-05	0.000562009	8.21454e-05	2.76668e-05	2.59445e-05	0.00011068
K00563	Unclassified	4677.78	5331.7	5286.04	5106.43	5365.25	4531.14	4456.47	5882	8159.31	4806.95	5776.34	8894.8	5299.88	5111.4	5729.48	6728.78	9592.83	4948.25	5193.08	5626.31	7108.52	5136.78	6037.59	4544.34	4657.21	6246.38	7211.72	5891.1	8173.6	6288.15	8436.51	4875.72	7549.5	5067.86	6201.5	5982.61	6456.87	4666.72	4538.94	6365.41	5887.41	4357.91	4971.78	5716.15	5325.38
K00564	Unclassified	1593.07	877.15	720.302	682.541	988.512	1062.95	709.195	997.269	1979.87	820.417	1100.85	1713.84	840.42	1139.3	1081.34	1140.83	2458.16	846.931	725.895	1198.1	1672.59	857.985	1270.17	472.552	944.804	1173.86	1546.84	883.839	2911.54	1192.45	1394.36	1275.14	1428.96	1968.08	1290.76	1264.72	973.687	1000.76	1141.22	1836.09	1543.24	874.898	896.667	1241.16	1397.16
K00566	mnmA; tRNA-uridine 2-sulfurtransferase	33772.9	36303.2	25809.1	30065.9	26790	24405.2	27564.4	32199.2	41143.2	28760.3	32244.4	27697	33838.4	30147.5	32437.8	35060	33809.1	25936.5	30387.1	25143.8	30995.9	28379.1	30733.6	28474.5	28958.1	28033.2	28284.4	33153.5	32640.8	31207.5	29900	33614.1	26676.2	27443.9	25706.7	22998.3	28347.2	28763	19309.1	28189.4	25031.9	26675.7	32890.5	29121.9	34418.8
K00567	Unclassified	15147.6	17576.7	13875.3	14234.1	14072.6	13129.1	14260.9	16870.8	21078.6	13322.4	16762.8	17897.2	15464.5	15289.4	17287.1	17756.3	17970.4	15825.2	16455.2	12830.6	16088.2	14843.9	15495.5	14968.7	13069.4	15829.3	17054.7	16410.1	17873.4	18623	17872.9	16761.1	14858.3	15402.2	15216	12710.1	15583.4	15328.2	11307.5	15580.4	16385.8	13175.8	16590.2	15333.2	15148.8
K00568	ubiG; 2-polyprenyl-6-hydroxyphenyl methylase / 3-demethylubiquinone-9 3-methyltransferase	299.933	472.36	336.165	256.155	299.37	305.772	316.528	417.335	380.401	302.402	435.482	737.395	339.902	440.737	450.08	469.772	448.929	650.649	299.899	301.132	262.355	408.846	432.442	331.818	424.773	432.363	506.243	402.946	379.062	551.131	722.1	263.092	393.439	317.687	428.423	430.45	519.086	238.158	246.849	379.272	640.602	563.55	352.608	265.262	254.157
K00569	TPMT; thiopurine S-methyltransferase	98.7327	81.3254	62.9958	98.8644	49.6124	64.9602	78.424	49.9585	118.485	87.4947	47.0069	35.7428	119.835	116.809	111.534	50.1803	30.2687	85.7884	62.6312	54.3306	50.9242	124.433	109.486	69.2844	86.351	63.5564	39.9174	60.6231	59.637	61.9065	45.6829	64.6695	30.7235	64.6181	86.123	52.4081	61.6773	66.9794	39.255	90.1198	109.743	68.4559	92.8222	97.5099	107.721
K00570	pmtA; phosphatidylethanolamine/phosphatidyl-N-methylethanolamine N-methyltransferase	12.5486	14.8811	21.184	11.4449	10.7242	13.3305	10.0537	13.2588	38.4547	15.7219	15.3123	26.4209	26.3055	12.0184	33.4892	20.6226	13.9944	10.2854	8.844	10.7629	18.201	42.0469	24.3734	27.1557	21.706	8.84399	15.7392	8.90454	19.1747	11.8526	20.0198	21.937	15.8791	8.26062	21.1321	5.79012	14.3606	18.2989	15.3235	21.1128	39.373	36.9617	10.6332	12.6119	11.042
K00571	Unclassified	22490.8	25545.3	19616	20585.1	18999.1	19647.9	18556.8	23227.8	29563.5	18761.7	21981.4	22695.4	23329.1	21161.6	23141.7	25306.5	25920.6	18873.4	22199.9	18900.3	23128.1	20308.2	21866.6	20858	19612.1	20568.5	22981.1	23376.3	24258.3	23824	24555.3	25063.2	20877.3	21683.5	20132.9	18312	21736.9	21371.8	15333.2	21473.4	19012.9	19004	24135.6	21068.8	22246.7
K00573	Unclassified	1450.38	1509.14	1069.91	844.515	746.763	951.296	857.643	722.092	1371.84	865.642	1082.1	845.474	1032.95	1226.97	1202.1	833.645	584.678	768.433	918.315	718.992	634.079	1832.19	841.151	630.161	968.066	1399.88	758.148	990.85	1038.66	1128.67	645.491	769.847	470.63	718.998	1127.2	597.531	1312.56	845.827	592.843	980.484	1637.03	1283.31	1405.42	991.756	1077.08
K00574	Unclassified	2946.84	2216.1	1754.6	1640.69	1895.44	3056.13	1876.58	2585.09	3645.77	1763.59	2151.25	4431.38	2484.77	2375.92	2647.04	2383.78	4885.79	2060.92	2031.31	2384.82	3059.45	2522.82	2674.65	1812.21	2095.19	2274.73	3430.3	2196.58	4663.08	2431.22	3210.76	2682.03	3018.3	4148.06	2141.66	2549.27	2203.71	2678.67	2332.22	3851.93	2779.74	2044.33	2331.48	2660.76	2832.84
K00575	cheR; chemotaxis protein methyltransferase CheR	4440.02	5361.83	3839.48	3844.02	4020.62	3751.62	3110.74	4780.32	5479.67	3732.4	4648.97	6963.47	3672.01	4171.02	4535.24	4643.78	6739.32	3843.48	3541.17	3814.16	4530.43	4716.35	4356.49	3214.66	3749.59	4757.33	4899.99	4336.09	6236.81	5138.38	5597.11	3498.76	5572.08	3554.21	4371.79	4149.74	4887.6	3065.62	3046.96	4412.39	5731.3	3509.36	3805.66	3802.79	3755.05
K00577	mtrA; tetrahydromethanopterin S-methyltransferase subunit A	49.0806	89.8448	0.586919	14.8769	112.186	121.201	42.7685	90.5262	1.6911	59.0145	31.933	5.54447	24.5178	12.6735	1.08412	58.9882	10.455	6.58069	2.55355	50.0379	5.74547	8.52662	62.9998	0.183713	31.234	26.5916	2.85033	5.15641	4.1448	41.7652	78.6402	43.9902	51.6546	1.02593	16.9112	1.23559	5.15175	1.25434	1.03946	1.28914	15.1297	3.42775	14.1522	36.0666	2.09801
K00578	mtrB; tetrahydromethanopterin S-methyltransferase subunit B	33.4058	65.0916	0.00381034	9.72833	81.6011	88.4004	30.1286	65.1013	0.015899	40.4603	19.2205	0.054959	13.0482	5.26027	0.00915314	41.7882	3.92873	1.13918	0.448903	35.9515	3.89356	1.73651	45.6572	0.00178177	20.0926	13.0227	0.0230022	1.86148	0.232025	13.8879	57.3161	32.0543	36.9232	0.00863995	10.0907	0.00876004	0.544773	0.127439	0.00864338	0.0137453	1.65538	0.503704	9.06407	24.1995	0.0200947
K00579	mtrC; tetrahydromethanopterin S-methyltransferase subunit C	33.4058	65.0916	0.00381034	9.72833	81.6011	88.4004	30.1286	65.1013	0.0158991	40.4603	19.2205	0.0549591	13.0482	5.26027	0.00915315	41.7882	3.92873	1.13918	0.448903	35.9515	3.89356	1.73651	45.6572	0.00178177	20.0926	13.0227	0.0230022	1.86148	0.232025	13.8879	57.3161	32.0543	36.9232	0.00863996	10.0907	0.00876004	0.544773	0.127439	0.00864339	0.0137453	1.65538	0.503704	9.06407	24.1995	0.0200947
K00580	mtrD; tetrahydromethanopterin S-methyltransferase subunit D	33.4058	65.0916	0.00381087	9.72833	81.6011	88.4004	30.1286	65.1013	0.0159034	40.4603	19.2205	0.0549762	13.0482	5.26027	0.00915513	41.7882	3.92873	1.13918	0.448905	35.9515	3.89356	1.73651	45.6572	0.00178238	20.0926	13.0227	0.0230069	1.86149	0.232034	13.8879	57.3161	32.0543	36.9232	0.00864163	10.0907	0.00876084	0.544776	0.127441	0.00864532	0.0137501	1.65541	0.503708	9.06407	24.1995	0.0201003
K00581	mtrE; tetrahydromethanopterin S-methyltransferase subunit E	33.4058	65.0916	0.00381087	9.72833	81.6011	88.4004	30.1286	65.1013	0.0159034	40.4603	19.2205	0.0549761	13.0482	5.26027	0.00915512	41.7882	3.92873	1.13918	0.448905	35.9515	3.89356	1.73651	45.6572	0.00178238	20.0926	13.0227	0.0230069	1.86149	0.232034	13.8879	57.3161	32.0543	36.9232	0.00864162	10.0907	0.00876083	0.544776	0.127441	0.00864532	0.0137501	1.65541	0.503708	9.06407	24.1995	0.0201003
K00582	mtrF; tetrahydromethanopterin S-methyltransferase subunit F	33.403	65.09	0.00324669	9.72646	81.5995	88.3992	30.1265	65.099	0.0140141	40.459	19.2152	0.0489425	13.0475	5.25838	0.00795659	41.7858	3.92294	1.13796	0.448423	35.9501	3.89308	1.7363	45.6563	0.00159993	20.0907	13.021	0.0199262	1.8605	0.22864	13.8857	57.3153	32.0539	36.9216	0.00746691	10.0886	0.00737054	0.542012	0.126738	0.00752825	0.0123426	1.64694	0.501618	9.06366	24.1981	0.0177527
K00583	mtrG; tetrahydromethanopterin S-methyltransferase subunit G	33.4041	65.0903	0.00325353	9.72808	81.5997	88.3997	30.1279	65.1007	0.014928	35.9494	17.5293	0.0530488	5.14773	0.180023	0.00827154	41.7863	3.9229	1.13838	0.448841	35.9509	3.89317	1.73648	45.6566	0.00175813	20.0922	6.8121	0.0205869	0.171357	0.230698	4.29763	57.3156	32.0543	36.9221	0.00768157	10.0896	0.00720863	0.54248	0.127348	0.00785372	0.013563	1.65429	0.503543	6.80402	21.3781	0.0189844
K00584	mtrH; tetrahydromethanopterin S-methyltransferase subunit H	64.2223	149.199	45.2311	40.5563	132.954	135.31	66.9798	132.147	39.1567	72.9977	48.3531	146.512	49.0777	18.6753	21.5596	92.3497	119.689	38.4404	17.4675	126.371	40.7884	57.0712	96.0425	25.4385	56.1863	105.636	78.2029	30.3373	105.459	56.3997	127.789	73.9873	98.0121	23.1212	69.8842	48.1753	70.4881	52.9439	68.9642	49.7709	53.7342	28.8295	43.1711	78.5429	19.1912
K00586	Unclassified	33.5036	65.2022	0.0475448	9.77895	81.6615	88.4442	30.1906	65.1664	0.0790918	40.508	19.3751	0.236732	13.0751	5.31125	0.0537101	41.879	4.17049	2.53505	0.461912	35.9938	3.91194	1.76251	45.6923	0.00670398	20.5212	13.2478	0.140042	1.8882	0.389339	15.2093	57.3437	32.0663	36.9833	0.0538981	10.1616	0.0693429	0.651912	0.146422	0.0496331	0.356681	2.7379	2.54323	9.07532	24.258	0.0969971
K00587	ICMT; protein-S-isoprenylcysteine O-methyltransferase	0.0172939	0.0067603	0.00156148	0.0187249	0.0058903	0.00793234	0.017033	0.0205454	0.0127435	0.00711954	0.0488928	0.0508072	0.0040323	0.0188554	0.00585097	0.0112706	0.0150839	0.0067603	0.00484249	0.00988074	0.00208137	0.00225341	0.00478896	0.00182051	0.0172021	0.0133939	0.0137833	0.00988143	0.0265138	0.0227675	0.00448575	0.00442175	0.00923296	0.00494164	0.0146453	0.00234039	0.0113125	0.00710974	0.00582408	0.0140442	0.0855579	0.0128065	0.00422975	0.00390187	0.0166454
K00588	E2.1.1.104; caffeoyl-CoA O-methyltransferase	83.2496	23.7864	87.014	70.0832	43.4785	33.4696	60.1983	43.78	143.53	118.162	102.636	148.012	23.3882	69.3843	36.2466	45.1706	133.906	63.203	37.61	39.34	83.0867	47.7027	206.543	26.586	128.672	136.759	78.2808	57.0689	108.946	118.781	43.7605	19.6515	47.4465	25.2813	68.1694	22.8357	31.2709	63.8378	46.1129	51.5448	227.224	81.1914	17.8586	56.2951	50.3998
K00589	MET1; uroporphyrin-III C-methyltransferase	3.22196e-08	1.25949e-08	2.90914e-09	3.48857e-08	1.09007e-08	1.47784e-08	3.17336e-08	3.82774e-08	2.3742e-08	1.30809e-08	9.10903e-08	9.4482e-08	7.51243e-09	3.51287e-08	1.09007e-08	2.08329e-08	2.81023e-08	1.25949e-08	8.96358e-09	1.81702e-08	3.87771e-09	3.87771e-09	8.72058e-09	3.39172e-09	3.1737e-08	2.49536e-08	2.56792e-08	1.84097e-08	4.91782e-08	4.19122e-08	7.995e-09	8.238e-09	1.72016e-08	9.20658e-09	2.68942e-08	4.36029e-09	2.10759e-08	1.30809e-08	1.06611e-08	2.61652e-08	1.5747e-07	2.30164e-08	7.752e-09	7.26943e-09	3.10114e-08
K00590	Unclassified	308.612	336.233	287.285	284.802	239.254	413.585	229.066	752.292	428.061	328.212	294.59	325.243	365.087	257.215	249.476	298.475	302.362	320.835	428.205	287.168	410.143	351.831	283.562	489.416	422.185	325.214	337.757	383.645	341.869	346.218	340.636	773.051	310.844	296.048	349.151	192.379	334.781	376.248	315.667	262.041	504.216	336.141	376.99	329.776	334.884
K00591	COQ3; polyprenyldihydroxybenzoate methyltransferase / 3-demethylubiquinol 3-O-methyltransferase	3.30172e-09	1.29067e-09	2.98116e-10	3.57493e-09	1.11706e-09	1.51443e-09	3.25192e-09	3.9225e-09	2.43298e-09	1.34047e-09	9.33453e-09	9.6821e-09	7.6984e-10	3.59984e-09	1.11706e-09	2.13486e-09	2.8798e-09	1.29067e-09	9.18547e-10	1.862e-09	3.97371e-10	3.97371e-10	8.93646e-10	3.47568e-10	3.25227e-09	2.55713e-09	2.63149e-09	1.88655e-09	5.03956e-09	4.29497e-09	8.19292e-10	8.44194e-10	1.76274e-09	9.43449e-10	2.75599e-09	4.46823e-10	2.15976e-09	1.34047e-09	1.09251e-09	2.68129e-09	1.61368e-08	2.35862e-09	7.94391e-10	7.44939e-10	3.17791e-09
K00594	xyoA; alditol oxidase	53.344	30.8308	29.7974	50.0719	20.6625	31.5237	37.3809	27.0812	59.9483	43.3333	22.6454	43.3059	58.3178	54.9147	50.7545	23.929	19.9835	48.2123	29.3187	27.4889	24.4893	59.0835	52.1942	34.5873	42.9663	22.7861	17.7978	29.8648	31.6332	38.3761	27.5986	28.23	16.7278	32.6501	44.0735	24.8075	29.643	33.9727	17.3161	45.7523	74.1393	33.1214	43.6575	47.6098	50.5502
K00595	cobL-cbiET; precorrin-6B C5,15-methyltransferase / cobalt-precorrin-6B C5,C15-methyltransferase	12888.6	14986.3	12052.2	13016.4	10651.7	11047	10381.6	13796.6	16520.7	10961.9	14417.9	17022	14980.6	12183.3	13562.9	15392	19332.2	10984.4	11725.4	11324.5	12625	12347.8	13661	11850.7	11557.4	12191.3	14472.2	14019.1	14007.6	14542.8	17168.3	13797.8	13748	9230.88	13102.9	11297.8	13387.5	11363.9	8281.74	12188	10433.6	10363.9	13192.5	12031	12671.4
K00596	Unclassified	61.1105	33.9363	55.2786	33.537	50.3007	2.37627	38.4126	32.7513	29.9223	26.4014	29.9016	74.0091	29.0869	16.047	10.6984	61.6773	206.406	1.17186	12.9654	15.1441	61.8346	90.4419	48.2506	1.06664	56.334	47.1431	54.3839	57.7814	134.035	2.95784	37.7202	41.5058	29.2885	43.3771	118.27	27.4289	54.7374	86.5397	1.42507	46.6439	43.6005	44.1168	58.2813	121.26	2.86962
K00598	Unclassified	841.213	1026.7	839.421	940.308	734.277	623.121	892.835	815.95	1302.13	711.318	813.809	1864.64	948.901	808.429	929.01	1012.19	1853.6	795.327	764.335	905.99	1000.57	897.612	860.267	787.895	764.054	1324.88	1178.9	853.984	1555.86	892.477	1549.1	802.524	1137.08	535.229	1199.33	826.057	1155.79	775.591	770.455	960.924	1433.32	617.416	925.727	987.394	807.206
K00600	glyA; glycine hydroxymethyltransferase	18872.6	20120.5	15429	17354	15569.2	15244.7	15527.4	19922.5	24560.4	16567.4	19524.7	18175.2	19727.8	17333.5	19054.4	20106.4	21205.8	15273.4	17863	14918.4	18431.6	17263.5	18184.3	16950.7	16786.9	16990.5	17936.9	18917.8	20245.7	19618.7	18744.7	20276	16696.5	15635.4	16839.8	14099	17186.4	17306	12144	17100.4	16307.9	15309.5	18451.7	17179.4	19320.9
K00601	E2.1.2.2; phosphoribosylglycinamide formyltransferase	19.9973	20.6233	21.5772	7.06987	18.4577	6.27114	19.0298	30.205	36.9612	46.7449	11.829	17.9072	9.04677	10.5191	7.57697	18.9923	14.1934	31.2529	0.963937	5.95537	10.1811	53.3523	34.4492	7.45424	89.2497	9.81544	1.69552	9.20413	22.3619	28.9569	21.8082	5.96194	8.14185	5.95583	26.6593	12.0483	53.6644	29.5615	12.6384	8.169	54.9554	69.8944	9.18004	17.0134	13.5478
K00602	purH; phosphoribosylaminoimidazolecarboxamide formyltransferase / IMP cyclohydrolase	27403.7	29536.6	21751	24639.8	22177.2	20582.9	23348.7	27062.6	33696.8	23118.2	27013.1	22855.8	27037.2	24957	27311.7	28342.5	27002.4	21122.9	25722.9	20322.8	25229.3	23642.7	25131.1	23346.2	23440.5	23216.4	23646.1	26253.9	27601.4	25840.2	24944.8	28185.8	21451.8	22179.6	21952.1	18830	23337.5	24612.2	15671.7	22962.9	20880.8	22085.5	26614	24469.3	27271.5
K00603	fctD; glutamate formiminotransferase / 5-formyltetrahydrofolate cyclo-ligase	4199.13	4996.31	3085.33	3880.86	2797.31	2415.3	3101.89	3986.06	4141.96	3476.03	4584.41	4102.73	4885.05	4186.66	3965.86	4580.39	4948.54	3050.36	2713.55	3351.07	3069.51	3560.98	4381.59	2579.57	4337.53	2963.12	3602.09	4163.46	3661.83	3746.28	4634.67	3612.89	3561.33	2253.24	2940.88	3217.04	4150.85	2734.72	2044.51	3230.07	2980.31	3595.51	3459.88	3222.07	4783.8
K00604	MTFMT; methionyl-tRNA formyltransferase	20197.9	21303.2	16771.3	17863	16445.4	16306.6	16605.8	20536.9	26041.7	17023.2	20277.5	20316.4	20150.3	18577.6	20355.5	21409.3	22942	16702.3	18897.3	15966.8	19696.8	18492.5	19379.4	17247.6	17346.9	18507	19652.6	19918.3	22253.9	20827.7	20641	20924.3	18066.3	17399.4	18105.8	15072.8	18716.8	18270.9	13258	18724.3	17840.2	16547.2	19900.1	18637.3	19817.9
K00605	gcvT; aminomethyltransferase	11338.6	11775.8	8155.95	9633.03	8054.97	7731.74	8971.43	10082.6	12426.5	9311.2	10581.4	8032.73	10635.4	9933.88	10253.6	10719.7	8809.9	8810.85	9632.81	7551.45	8782.44	9707.09	9138.3	8619.86	9598.75	9530.12	8414.58	10514.8	10144.9	10902	8025.2	10744.5	7523.98	8222.39	8155.57	6758.15	9560	9156.92	5930.75	8727.04	9512.57	8998	10634.8	9357.24	10781.5
K00606	panB; 3-methyl-2-oxobutanoate hydroxymethyltransferase	11806.1	13388.9	9515.4	11090	9304.18	8981.34	9629.89	11900.1	14153.9	10286.8	12031.3	8823.53	11978.2	11382.1	11817.8	12252.7	10151.5	9346.94	10720.3	8686.72	10524	10694.8	11073	10420.1	10558.2	9679.63	9958.18	11581.3	10639.5	12106.1	10921	12376.6	9554.55	8938.39	9763.9	7485.24	10513.5	10439.1	7039.18	9541.01	10077.7	10141.3	12124.1	10563.2	12136.3
K00608	pyrBI; aspartate carbamoyltransferase	23.9341	0.677638	12.7357	11.5239	0.559927	6.35898	8.46671	0.532251	47.9877	2.07605	6.01922	1.78601	0.24175	7.20106	21.3618	27.4171	2.27982	4.00473	11.1124	0.363913	0.367281	11.3074	0.317739	4.3645	16.9053	3.37394	1.36932	20.3773	21.8714	44.7091	0.366458	1.94726	1.4914	0.416229	0.757936	0.667731	1.2056	10.2442	2.09633	5.03883	26.1891	34.7227	0.0888565	12.7091	43.1238
K00609	pyrB; aspartate carbamoyltransferase catalytic subunit	20931.5	22199.8	17034.1	18717.3	17208.1	17053.7	17142.7	21055.6	26932	17289.9	21064.5	20175.3	21410.9	18752	21017.4	22404.1	23816.6	16809.1	19296.3	16644.4	20355.4	18674.4	20320.5	18652.1	17642.2	18435.4	20460.6	20509.3	22552.1	21180	21571.7	22037	18570.6	18668.8	18742.8	15589.7	18930	19321.2	13680.1	19702.4	17566.1	16794.4	21096	19243.7	20597.9
K00610	pyrI; aspartate carbamoyltransferase regulatory subunit	14284	14603.1	11084.3	12980.4	10636.9	10640.4	10746.8	13107.1	16624.2	11301.5	14206.9	10126	14918.9	12250.2	13790.9	14240.3	12599.1	9613	12919	10235.7	11707	12428	12409	12940.9	11737.6	11187.5	12226	13871.3	12195.6	13167.1	12459.5	15174.9	10219	10580.2	12105.2	8782.19	11440.2	13061.2	7997.12	11318.4	8987.75	11102.5	14962.3	12177.1	13715.4
K00611	OTC; ornithine carbamoyltransferase	10641.8	11810.7	10511.7	9494.41	10072.8	10401.9	8836.53	12097.1	15048.2	8802.72	11852.3	16851.6	10726.3	10410.1	11522.8	12925.4	17591.6	10917.7	10531.7	9797.9	12526.2	11088	11166.6	9698.61	9406.22	11485.2	14271.1	11111.9	15015	13645.4	15648.7	11330.3	13441.4	11029.6	12201.2	10296.5	11950	10489.7	9051.48	12247.5	12556.5	9068.54	11032.2	11255.9	10051
K00612	Unclassified	610.661	591.462	536.815	491.131	394.42	503.752	533.087	559.438	690.92	533.163	611.993	971.836	532.918	557.431	586.824	593.729	755.807	569.026	487.872	495.047	466.799	541.667	585.76	459.783	718.439	706.865	698.365	551.573	866.21	682.435	771.306	424.874	552.211	405.227	571.868	360.478	736.936	555.5	360.288	616.056	841.697	662.111	469.188	625.289	594.843
K00613	GATM; glycine amidinotransferase	16.6411	11.0491	6.72023	9.52509	3.18558	24.3694	21.9841	20.7748	26.1264	10.0087	4.56993	36.6656	15.1624	4.20066	7.30927	13.7902	57.3497	25.4634	11.0095	5.59343	14.089	6.38915	14.287	4.87125	5.81852	44.1578	43.4949	11.0333	41.9503	11.2894	36.7447	24.1866	7.23687	7.79465	19.8953	21.9229	37.1426	8.40864	12.2248	28.3813	15.8271	6.85419	11.3912	40.5766	4.27636
K00615	E2.2.1.1; transketolase	41029.3	42840.7	36905.4	37847.6	34387.8	32315.5	34294	43318.7	52733.1	35180.7	44840.3	56307.2	42608.1	38411.9	41751.7	45891.1	59118.1	36881.8	37502	34898.4	40007.3	40344.8	41023.5	34505.7	37377.9	41778	46231.1	42841.5	49595.9	45780.2	52440.5	39971.5	44062.1	33221.2	42888.3	35062.6	43643.2	35443	28509	39710.7	41989.4	33818.4	38914.6	38621.5	38687.1
K00616	E2.2.1.2; transaldolase	9159.85	10640	8235.09	8310.44	7963.63	6861.85	8296.08	9314.09	11245	7944.18	10051.3	12020.4	10548	8934.55	9517.23	10235.1	13909	7842.36	7899.15	7919.34	9162.89	8981.55	10234.7	6840.51	8494.96	8478.24	9737.06	9354.19	10659.3	9242.44	11333	8620.99	9052.67	6812.49	8764.24	7664.75	9057.29	7951.47	5678.09	8927.97	8472.43	7774.28	8388.89	8847.3	10149.6
K00619	argA; amino-acid N-acetyltransferase	431.217	1473.94	774.802	572.954	680.968	844.201	881.07	1168.84	766.634	495.577	554.75	566.836	472.098	774.133	918.217	826.65	551.092	741.582	903.99	406.597	793.713	714.068	718.029	712.976	548.163	691.282	443.212	472.008	507.392	623.634	797.834	1176.65	376.677	446.332	401.93	449.948	694.683	791.298	309.056	404.542	680.537	773.563	710.496	584.637	672.761
K00620	argJ; glutamate N-acetyltransferase / amino-acid N-acetyltransferase	7672.22	9380.94	8360.08	7942.34	7696.5	7541.68	6919.04	9783	11395.5	6848.48	9313.52	12776.9	8634.99	8049.47	9121.15	9988.05	13424.2	8773.55	8331.09	7418.11	9279.94	8391.88	8643.13	8125.93	7298.26	8561.9	10675	8792.53	11090.1	10678.5	12177.6	9332.98	9933.68	7281.69	9540.88	8256.82	9104.73	7889.54	6374.78	8373.65	9729.32	7077.07	8603.33	8178.42	7535.16
K00621	GNPNAT1; glucosamine-phosphate N-acetyltransferase	8.231	4.93281	18.4722	5.78248	8.50428	9.24338	4.78911	5.20117	17.3814	5.36447	9.96062	31.3809	36.2367	7.36725	7.3688	12.6706	28.2464	4.88435	12.4693	15.4963	13.7209	33.6768	7.71575	4.39123	6.69881	17.4077	26.7718	6.79989	17.914	10.3218	16.7303	40.1158	11.2742	8.77175	26.2114	12.9512	23.593	40.566	23.0587	33.3856	4.25834	4.09586	2.65224	14.4131	8.98871
K00622	nat; arylamine N-acetyltransferase	0.0117653	0.00102036	0.00639942	0.00566204	0.00653406	0.00753644	0.000554779	0.00755109	0.0105452	0.0058541	0.00568432	0.0851823	0.00602447	0.00450769	0.03359	0.0127403	0.0234115	0.0189935	0.00600026	0.0122021	0.0143581	0.00729265	0.00568263	0.00481089	0.0112403	0.00596593	0.0150224	0.00605714	0.0240592	0.00586791	0.0288275	0.0033535	0.0137877	0.0100317	0.0114612	0.0171228	0.00186938	0.0089982	0.00758357	0.0194866	0.00673095	0.00476551	4.66792e-05	0.0145163	0.0065283
K00624	E2.3.1.7; carnitine O-acetyltransferase	2.82248	2.24993	2.755	1.97789	2.70275	4.71884	0.991774	2.76187	5.37648	1.27232	3.91188	11.4446	2.6772	2.00305	4.3231	3.45076	6.53143	2.02267	3.12455	3.48252	6.15429	1.64915	8.18885	4.08527	3.5878	4.25696	3.55514	3.94176	6.1117	1.8547	2.83374	2.02867	1.27264	1.55196	3.45494	2.59999	0.49754	5.9693	2.79333	2.56719	3.2311	1.51888	1.15213	6.79042	3.08131
K00625	E2.3.1.8; phosphate acetyltransferase	19041.6	18940.3	13993.2	16547.5	13871.9	13900.4	14181.8	17063.3	22026	15528.7	18317.1	15882.9	19299.9	16796.5	17481.9	18768	19641.4	13529.4	15572.8	14071.7	16482	16045.2	17212.6	14409.4	16521.4	14984.3	16345.5	18218.3	19254.6	18424.5	17015.8	18137.8	15465.7	14262.3	14643.3	12693.8	15839	15563.5	11045.3	15793.1	14134.3	14862.2	17440.9	16004.6	19063.8
K00626	ACAT; acetyl-CoA C-acetyltransferase	10706.9	12993	10833.4	9442.45	9622.56	9839.47	8738.96	12496	14648.6	9704.36	12187.7	20471.6	9954.1	10889.9	11226.4	13621.4	18014.8	11594.3	10167.5	10284.6	12720.3	11715.3	11581.8	8246.54	10381.9	12972	15153.9	11787.6	15655	13754.7	16725.2	10244.4	14437.4	10669	11536.1	11644.5	13641.7	9280.13	8925.65	12624.3	13608.2	9763.21	10932.7	11617.6	9055.56
K00627	DLAT; pyruvate dehydrogenase E2 component (dihydrolipoamide acetyltransferase)	5091.91	7164.17	6384.4	4958.21	5697.32	4920.18	4611.43	6309.03	6855.84	4836.17	6933.7	13045.3	5488	7866	6214.15	7322.65	10821.6	7210.65	5114.24	5866.69	8401.74	6690.01	6004.88	4191.98	4966.63	8153.33	10244.2	6258.65	9967.32	9908.22	11925.1	4969.35	10016.1	5165.94	7460.31	7147.59	8218.47	4817.49	5851.77	7708.59	9551.07	5083.02	6300.35	7028.52	5218.06
K00630	ATS1; glycerol-3-phosphate O-acyltransferase	0.035738	0.0139702	0.00322682	0.0386953	0.0120911	0.0163922	0.0351989	0.0424574	0.0263347	0.0145093	0.101037	0.1048	0.00833279	0.0389648	0.0120911	0.0231078	0.0311711	0.0139702	0.0099424	0.0201543	0.00430116	0.00430116	0.00967287	0.00376209	0.0352027	0.0276785	0.0284833	0.0204201	0.0545485	0.046489	0.00886806	0.0091376	0.01908	0.0102119	0.029831	0.00483643	0.0233774	0.0145093	0.0118253	0.0290224	0.174666	0.227514	0.00859853	0.00806326	0.0343979
K00631	plsB; glycerol-3-phosphate O-acyltransferase	7.49182	22.3659	1.26736	5.83421	6.052	25.2746	10.6167	10.7168	25.2051	24.0918	7.76509	5.55818	1.51626	2.20837	51.0095	43.137	3.54612	16.027	32.9431	1.53332	29.8029	7.71813	1.3562	10.3046	2.52041	3.27133	2.8735	10.7536	5.89879	10.8969	19.1086	26.7904	7.70009	22.8518	63.4281	19.7908	16.2073	17.0961	1.77768	1.70528	32.7618	6.34366	1.05773	1.23734	34.5447
K00632	fadA; acetyl-CoA acyltransferase	2902.94	2909.7	2635.26	2215.72	1771.69	2005.55	1781.5	2437.08	3303.11	2368.13	2868.24	4802.87	2308.08	2662.42	2629.32	3113.88	3783.59	2974.84	2393.21	2424.35	2456.58	3118.35	2386.4	1712.67	2455.19	3652.53	3444.64	3084.93	3731.98	3675.02	3253.41	2056.67	3167.38	2095.02	2875.45	2760.95	3705.8	1828.52	1977.67	2939.98	3603.03	2579.23	2786.44	2750.51	2094.34
K00633	Unclassified	6049.36	6437.31	5227.41	6012.52	5505.29	6111.68	5466.58	6640.4	8627.66	5221.89	6652.75	6404.04	6933.97	5478.33	6647.35	6981.34	7147.29	5500.53	6565.69	5192.22	6213.94	5691.9	6191.83	6990.81	5261.26	5571.61	6529.64	6366.8	6303.01	6657.1	6646.66	7540.78	5341.81	6214.58	6676.36	4899.69	5382.79	6552.7	4407.94	6069.44	5141.77	5086.87	6841.97	5860.86	6115.7
K00634	ptb; phosphate butyryltransferase	9614.83	10044.5	6854.09	8028.3	6893.87	6215.15	7304.69	8010.05	9861.88	7582.79	8786.73	7084.68	8634.83	8283.95	8346.24	8987.82	8293.82	6794.27	8038.93	6395.63	7498.41	7902.2	7617.34	6742.2	8040.49	8259.45	7245.19	9094.62	8630.7	8817.29	6922.82	8688.56	6356.06	6572.42	6615.08	5941.9	7945.99	7207.34	4507.35	7218.4	6914.85	7394.51	8621.61	7847.53	8922.33
K00635	tgs; diacylglycerol O-acyltransferase / wax synthase	36.3176	13.5228	4.02554	37.7214	12.4711	16.4605	33.883	41.5141	26.2981	14.8839	97.9684	108.698	8.87647	38.1547	13.4041	24.0526	32.1505	15.5953	10.1175	20.513	5.47758	5.61925	9.82874	4.65204	34.8866	27.7249	29.0644	20.4971	54.94	52.3659	11.221	9.57385	19.6288	11.1445	29.9827	6.25076	23.3813	14.9828	12.0755	29.7181	168.682	26.0026	8.68094	9.23825	33.6721
K00638	Unclassified	289.072	372.52	328.295	304.182	268.785	350.476	319.347	234.612	353.465	245.973	359.905	771.279	389.352	370.586	381.174	355.701	803.047	325.007	302.537	255.327	358.242	385.188	369.294	234.863	269.368	434.024	542.912	404.035	459.049	396.844	459.209	308.515	364.573	249.196	380.196	398.981	270.934	306.01	292.959	419.066	323.908	270.93	363.074	333.088	222.988
K00639	kbl; glycine C-acetyltransferase	12042.7	12581.1	8656.98	9964.73	8881.02	7838.73	9684.5	10447.9	13189.5	9817.18	10971.4	6497.93	11265.9	10726.6	10965	10492.4	8037.74	9169.34	10525.5	7742.14	9186.7	10743.3	9749.06	9279.11	10377.3	9804.32	8508.05	11048.1	10029.3	11515.1	7706.59	11102.6	7481.31	9106.74	8269.67	6325.3	9630.09	9637.41	6196.88	9060.52	10128.3	9670.96	11645.8	9807.88	11903.6
K00640	cysE; serine O-acetyltransferase	21963.9	25173.1	18322.3	20663.2	18998.2	16743.4	18673	23013.5	28029.8	19335.8	23423.9	21380	23442.8	20844.4	22833.2	24411.2	25251.1	18330.2	20349.2	17636.5	21255.6	20096	21636.7	19126.4	19780.7	19619.9	21047.4	22460.4	22950.8	23055.6	23214.4	23306.3	20234.6	17480.4	19900.2	16676.4	20960.6	19466.7	14083	19575.4	18877.7	18377.6	21669.7	20456.9	22399
K00641	metX; homoserine O-acetyltransferase/O-succinyltransferase	890.146	1328.67	655.416	599.943	921.946	832.947	780.376	813.563	894.726	774.061	876.974	1015.19	934.041	850.679	735.556	853.29	813.196	1604.78	670.921	733.668	681.009	1242.98	891.02	538.768	790.179	1025.74	754.442	824.736	903.496	2167.15	812.325	772.542	712.77	702.224	817.096	629.649	954.54	607.686	575.418	841.604	2141.4	761.605	871.219	787.599	778.308
K00643	E2.3.1.37; 5-aminolevulinate synthase	12.8969	3.85736	5.84847	0.237036	13.8398	10.3148	0.0275874	4.79293	13.3929	11.6409	4.05085	17.8315	14.0622	4.19269	9.64746	9.27028	5.17742	14.5901	1.68596	8.41297	5.52535	16.1956	5.42046	11.8996	13.5331	3.59005	6.19009	6.85634	5.9449	6.03274	16.947	22.5975	3.77633	0.426584	17.3872	4.53673	4.61521	3.17013	1.92345	11.2121	41.8424	19.3463	0.00770908	0.644188	0.278972
K00645	fabD;	19337.4	20931	16505.8	17758.2	16148.8	15357.1	16065.3	20029.7	25116.8	16649.5	19762.6	19849.3	19600.8	18086	20082.3	20631.3	22196	16267.3	18162.2	15522.7	19047.2	17781.7	18921.3	16813.3	16707	17653.3	18906.8	19453.5	21216.3	20049.4	20050.1	19695.1	18111.3	16241.2	17647.8	14968.4	18180	17415.9	12648.7	17889.7	17050.1	15792.5	19122.4	17758.3	19452.2
K00646	Unclassified	19.5972	23.7853	21.7846	36.6678	16.4605	12.1262	10.2617	10.9917	35.9041	15.9082	26.6226	125.215	44.6265	50.7778	34.5463	27.1645	79.2215	28.1728	22.8977	43.6798	30.213	54.052	32.6111	11.6743	34.9629	56.2204	105.614	49.5752	29.5071	30.6876	67.0144	43.4874	50.3262	20.3268	54.6746	48.7582	19.0803	31.8348	54.6706	41.9979	31.935	29.7158	63.5652	13.5981	19.8852
K00647	fabB; 3-oxoacyl-	4704.55	3796.93	3316.88	3474.22	2410.21	2519.95	3014.19	3247.66	4551.91	3128.19	3468.96	1758.86	2856.85	3325.19	4023.79	2970.4	1304.72	2349.48	3721.96	2261.57	2388.68	4137.51	2870.14	2275.67	3336.52	3471.06	2576.52	3349.76	2923.53	3186.16	2130.76	3308.53	1810.73	2987.65	3767.67	1807.31	3933.06	3634.6	2019.81	2914.47	3115.92	3558.97	4160.53	3748.68	3155.38
K00648	fabH; 3-oxoacyl-	26416.6	26885	22205.4	23560.3	20244.7	19936.7	21362.3	25451.6	33294.3	21654.6	25787	24555.2	25065.7	25115.5	27411	25277.2	25963.3	20085.7	24111.9	19796.5	23395.3	25300.7	23920.7	20386.4	22485.7	24404.2	23777.6	25387.8	28729.3	25883.7	25087.5	24325.1	22544.7	21079	22852.3	18552.6	25145.8	22562.7	15937.5	23447.2	22590	21786.4	25595.4	23747.2	25691
K00649	GNPAT; glyceronephosphate O-acyltransferase	0.000610277	0.000238562	5.51026e-05	0.000660777	0.000206473	0.000279921	0.000601072	0.00072502	0.000449702	0.000247767	0.00172536	0.0017896	0.000142294	0.00066538	0.000206473	0.000394599	0.000532291	0.000238562	0.000169781	0.000344164	7.34485e-05	7.34485e-05	0.000165178	6.42431e-05	0.000601137	0.00047265	0.000486394	0.000348702	0.000931493	0.000793866	0.000151435	0.000156038	0.000325818	0.000174383	0.000509407	8.2589e-05	0.000399202	0.000247767	0.000201935	0.000495599	0.00298267	0.000435959	0.000146832	0.000137692	0.000587394
K00650	LCAT; lecithin-cholesterol acyltransferase	3.59982e-07	1.40719e-07	3.25031e-08	3.8977e-07	1.21791e-07	1.65116e-07	3.54552e-07	4.27665e-07	2.65264e-07	1.46149e-07	1.01773e-06	1.05563e-06	8.39345e-08	3.92485e-07	1.21791e-07	2.32761e-07	3.1398e-07	1.40719e-07	1.00148e-07	2.03011e-07	4.33248e-08	4.33248e-08	9.74329e-08	3.78948e-08	3.5459e-07	2.788e-07	2.86907e-07	2.05687e-07	5.49456e-07	4.68274e-07	8.93262e-08	9.20412e-08	1.92189e-07	1.02863e-07	3.00482e-07	4.87164e-08	2.35476e-07	1.46149e-07	1.19114e-07	2.92337e-07	1.75938e-06	2.57157e-07	8.66113e-08	8.12196e-08	3.46483e-07
K00651	metA; homoserine O-succinyltransferase/O-acetyltransferase	18437	19931.5	14863.9	16312.2	15336.8	14631.2	15121.8	18340.9	23187.7	15251	18059.2	19120.8	18699.4	16841.3	18610	19873.3	21650.4	13986.4	16990.1	14832	18306.2	15575.8	17720.8	15870	15308	15980.3	18006.3	18185.8	21334.4	17352.3	19392.9	19078.7	16745	16650.3	15872.2	14193.5	16372.3	16651.9	11954.4	16812.3	13629.7	14310.3	17884.6	16930.7	18352.2
K00652	bioF; 8-amino-7-oxononanoate synthase	15092.6	16144.8	9735.06	13533.1	10495.6	9400.35	12324.2	12879.4	16166.4	12754.8	13179.8	6220.58	15436.1	13245.6	13668.2	14160.4	9395.3	10201.3	13063.4	9466.73	11599.6	11423.4	12499.7	12081.7	12988.8	10683.1	8940.35	14437.9	11156.6	12476.4	8664.67	14479.6	8225.36	10616.4	8805.76	7374.68	10468	12356.2	6948.72	9891.3	9300.46	11621.3	14591.7	11842.4	16057
K00654	SPT; serine palmitoyltransferase	0.00912481	6.53448e-10	1.50932e-10	1.80994e-09	5.65552e-10	7.66736e-10	1.6464e-09	0.00569679	0.0113936	6.78662e-10	4.72595e-09	4.90192e-09	0.00569679	1.82255e-09	5.65552e-10	1.08085e-09	0.00683946	6.53448e-10	4.65049e-10	0.00798213	0.00683946	0.00683946	4.52441e-10	1.75969e-10	1.64658e-09	1.29464e-09	1.33229e-09	9.55135e-10	0.00683947	2.17449e-09	4.14797e-10	0.0113936	8.92453e-10	4.77656e-10	1.39532e-09	2.26221e-10	1.09346e-09	6.78662e-10	5.53122e-10	1.3575e-09	8.16987e-09	1.19414e-09	4.0219e-10	3.77153e-10	1.60894e-09
K00655	plsC; 1-acyl-sn-glycerol-3-phosphate acyltransferase	23876.5	25860.6	20645.9	22587.3	20409.2	19974.8	20694	25462.8	32317	20729.3	25336.2	27072.6	26300.1	22427.6	25239.1	26712.5	30323.8	20905.1	22993.8	20141.1	24531.6	22725.3	24440.1	22331.7	20937.2	22355.6	25304.2	24674.4	27364.1	25583.9	27272.3	25517.1	23162.6	21495.9	23080.2	19703.7	22978.7	22773.2	16659.1	23835.1	21419	20248.2	24635.9	22953	24240.6
K00656	E2.3.1.54; formate C-acetyltransferase	27159.5	29869.5	23959.9	26677.6	24428.5	22450.2	24276.2	30250.8	36186.9	24048.7	30831.3	37900.2	28947.4	26015.4	29494.6	31596.7	40710.1	24082.5	25904.5	23541.6	29164.5	26469.3	27607.8	25098.5	23702.7	27767	31283.8	29506.4	34362.9	28934.8	34632.8	27426.3	29967.6	23783	29091	24717.2	27988.9	24616.6	19486.9	28110.2	25590.4	22009.1	27533	26582.7	26636.9
K00657	speG; diamine N-acetyltransferase	13019.5	13712.4	9708.01	10869.1	9564.69	9033.2	10367.1	11203	14347.7	10451.2	11613.3	11246.2	11934.1	11652.7	12128.8	12951.8	12106.1	9768.06	11397.8	9359.64	11130.2	10713.5	11084.5	9630.47	10873.9	11779.5	10987.9	12492.7	12815.8	12131.2	11335.9	12093.3	10068.9	9986.73	9687.54	8559.04	11432.1	10486.3	7379.39	10501.9	9301.51	10023.6	12350.1	11208	12035.6
K00658	DLST; 2-oxoglutarate dehydrogenase E2 component (dihydrolipoamide succinyltransferase)	4223.66	4529.73	2769.49	3294.94	2582.81	2090.36	2618.47	2832.19	4163.48	3224.95	3818.6	1892.84	4355.15	3625.67	3291.35	3323.76	3101.07	2566.71	2352.03	2603.92	2484.95	3972.24	3581.88	1994.24	3652.51	2985.7	2352.76	3234.37	3028.83	3731.61	2380.39	3034.47	2283.39	1661.4	2646.46	1954.28	3430.04	2462.65	1693.33	2706.01	3771.23	3299.29	3237.89	3026.83	4157.04
K00659	BAAT; bile acid-CoA:amino acid N-acyltransferase	0.00197328	0.000771371	0.00017817	0.00213657	0.000667613	0.000905103	0.00194352	0.0023443	0.00145408	0.000801136	0.00557882	0.00578654	0.000460098	0.00215145	0.000667613	0.00127591	0.00172112	0.000771371	0.000548973	0.00111283	0.00023749	0.00023749	0.000534091	0.000207725	0.00194373	0.00152828	0.00157272	0.0011275	0.00301191	0.123385	0.000489653	0.000504535	0.00105351	0.000563856	0.00164713	0.000267045	0.00129079	0.000801136	0.00065294	0.00160248	0.0690688	0.00140964	0.000474771	0.000445215	0.00189929
K00660	CHS; chalcone synthase	2.31353e-05	9.04374e-06	2.08891e-06	2.50497e-05	0.00281088	1.06116e-05	2.27863e-05	2.74851e-05	1.70479e-05	0.00702118	6.54074e-05	0.0067563	5.3943e-06	2.52242e-05	7.82726e-06	0.00632806	2.01788e-05	9.04374e-06	0.00223592	0.0091292	2.78439e-06	0.012265	0.00771673	2.43542e-06	0.011942	1.79179e-05	1.84389e-05	1.32191e-05	0.00839907	0.0193558	0.0138635	5.91529e-06	1.23516e-05	6.61078e-06	0.0149788	3.1309e-06	1.51335e-05	0.0063225	0.00725667	1.87879e-05	0.0739295	0.0322641	0.00491299	5.21981e-06	2.22678e-05
K00661	Unclassified	23669.2	25012.6	17755.8	21010.3	19578.1	18231.3	19446.3	22910.9	29556	20022.6	23522.7	21475	25266.4	21210.1	23271.6	24920.3	26888.9	19470.2	21837.9	19061.9	22967.6	19837	21766.1	20801.7	19756.5	20282.1	21751.1	23701.7	26093	24785.5	22217.8	25551.7	19704.9	20972.7	19099.6	18035	20290.7	21203.7	14747.6	21736.5	18620.4	18210.5	23116.6	21092.5	24988.2
K00662	Unclassified	1202.1	610.811	636.46	541.882	551.642	891.251	528.504	698.836	1229.52	559.862	725.602	1227.81	573.389	675.458	648.503	968.552	1324.1	662.758	515.446	671.41	959.802	665.537	780.799	408.185	592.747	819.7	991.345	736.141	1175.84	884.514	1059.84	646.662	872.192	1326.52	749.914	512.402	770.667	698.048	659.533	999.991	1022.09	588.863	748.821	822.592	557.495
K00663	Unclassified	290.788	213.74	200.057	220.293	210.227	170.639	250.935	268.398	322.52	238.813	385.826	534.977	253.141	203.327	290.873	276.501	626.604	314.742	253.997	223.669	246.88	198.161	208.243	270.76	254.492	272.603	373.426	217.862	505.903	288.377	374.839	193.247	408.1	257.86	249.125	257.751	284.692	220.669	213.761	338.253	424.215	236.108	217.131	274.804	323.388
K00665	FASN; fatty acid synthase, animal type	1.82685e-16	7.1413e-17	1.64949e-17	1.97802e-16	6.18072e-17	8.37939e-17	1.7993e-16	2.17033e-16	1.34617e-16	7.41686e-17	5.16483e-16	5.35714e-16	4.25955e-17	1.9918e-16	6.18072e-17	1.18123e-16	1.5934e-16	7.1413e-17	5.08236e-17	1.03025e-16	2.19867e-17	2.19867e-17	4.94457e-17	1.92311e-17	1.79949e-16	1.41487e-16	1.45601e-16	1.04383e-16	2.78841e-16	2.37642e-16	4.53317e-17	4.67095e-17	9.75331e-17	5.22014e-17	1.5249e-16	2.47229e-17	1.195e-16	7.41686e-17	6.04488e-17	1.48357e-16	8.92857e-16	1.30503e-16	4.39539e-17	4.12177e-17	1.75835e-16
K00666	Unclassified	11129.6	11271.4	7988.93	9981.57	8808.18	8007.32	8788.59	10723.9	12635.7	9107.85	10135.7	9283.76	10185.4	9903.47	10354.7	10682.2	10290.9	8099.47	9345.92	7452.51	9298.71	8539.87	9037.88	9339.55	9240.11	9629.78	8498.45	10670.9	10505.5	9931.11	9303.71	10041.4	8885.36	8387.45	7975.67	6501.81	8637.29	8850.17	5672.95	8151.91	9146.98	8372.92	9892	8880.63	10867.7
K00667	FAS2; fatty acid synthase subunit alpha, fungi type	5.97297	8.66004	4.86036	13.9182	4.91918	12.4353	8.9807	6.95718	4.88595	3.86646	10.729	76.0961	4.26987	3.99476	12.2168	6.45107	13.6394	7.59789	5.28056	3.62037	3.68942	5.54742	4.88207	5.13832	5.11496	23.5127	9.63317	4.8456	5.04418	45.8802	10.5418	3.78813	5.69442	5.64115	4.31565	9.56687	3.48489	10.2215	7.07777	6.1861	41.9339	23.7017	8.38464	17.9261	7.29309
K00668	FAS1; fatty acid synthase subunit beta, fungi type	69.8982	40.443	46.9817	56.3925	30.5354	70.8572	26.2642	98.0302	84.3573	43.1399	60.7386	53.3819	92.0811	33.3678	49.0884	41.8125	52.3549	33.4394	51.1967	43.0598	43.7713	49.6862	46.6009	44.723	48.074	29.3167	41.5199	55.2925	33.3955	51.7385	59.8963	72.9128	39.5862	34.8384	60.0019	37.5546	35.2004	50.9952	31.7886	31.9914	18.4394	31.2125	46.5417	30.6951	38.2567
K00670	Unclassified	0.0495441	0.0193672	0.00447339	0.0536439	0.0167628	0.0227248	0.0487968	0.0588593	0.0365081	0.0201162	0.14007	0.145287	0.0115519	0.0540175	0.0167621	0.0320363	0.043213	0.0193672	0.0137839	0.0279425	0.00596277	0.00596582	0.0134116	0.00521545	0.048805	0.0383712	0.0394869	0.0283087	0.0756234	0.0644532	0.0122974	0.0126676	0.0264509	0.014157	0.0413589	0.00670482	0.0324084	0.020116	0.0163955	0.0402342	0.24216	0.0354004	0.0119215	0.0111782	0.0476863
K00671	Unclassified	15.8855	9.8298	36.9301	11.5595	17.0065	18.4843	9.57343	10.3963	34.7588	10.7263	19.9073	62.7442	72.0273	14.4742	14.7356	25.3371	56.4877	7.0859	24.2374	30.9888	27.4408	64.6068	15.4295	8.78178	12.1249	33.1722	53.5392	13.342	35.4672	13.0615	33.4574	80.2303	22.5454	17.5418	51.8462	25.9012	46.3567	80.9394	46.1151	66.5632	5.44183	6.09475	5.30299	28.8246	17.9725
K00672	ftr; formylmethanofuran--tetrahydromethanopterin N-formyltransferase	86.3458	138.861	5.95515	39.3385	171.166	187.513	79.058	152.486	19.5186	88.2043	90.9993	65.9453	29.7533	28.2049	12.8528	99.8527	27.4785	10.0458	6.71105	83.8357	13.7886	13.2018	100.392	6.84546	61.0403	38.0882	20.3106	14.0257	33.6798	46.7051	124.922	71.9366	86.9449	5.91593	38.9828	4.21144	15.8067	9.90954	8.30074	19.384	98.786	21.1361	21.8625	52.5207	18.4391
K00673	astA; arginine N-succinyltransferase	7.32639	1.17064	3.8898	0.0736457	2.20618	1.39073	0.0669913	0.469109	5.81323	8.98139	2.2024	0.199457	3.85223	3.9221	5.58056	2.47651	0.640512	4.63983	5.51892	0.927426	1.83391	9.34008	2.96561	5.77838	4.03345	2.47097	0.618631	1.10635	2.59345	13.5946	3.33647	9.47332	1.85213	1.55071	62.8229	0.00920481	2.19918	2.00593	0.930413	6.68922	18.9896	18.6308	0.840716	0.275277	0.0654668
K00674	dapD; 2,3,4,5-tetrahydropyridine-2,6-dicarboxylate N-succinyltransferase	2596.29	2614.74	2662.66	2226.66	2853.51	2191.96	2429.78	2676.85	3918.52	2318.9	2835.28	2922.6	2844.95	2392.66	2601.87	2908.44	3901.8	2620.38	2451.54	2277.58	3257.76	3067.77	3089.08	2270.37	2376.3	2702.31	2936.38	2632.1	2954.4	2460.65	3168.74	2576.39	2426.39	2816.07	3282.83	2606.26	2864.67	2499.48	1912.16	3071.35	2638.8	2303.48	2833.76	2809.78	2485.29
K00675	Unclassified	843.908	1858.11	1480.94	1147.86	1235.48	1112.39	1175.17	1555.63	1815.63	1034.96	1360.42	1744.15	1023.92	1395.53	1534.51	1714.87	1767.69	1221.19	1361.27	1139.03	1609.31	1380.65	1415.19	978.297	1040.56	1466.38	1500.19	1116.8	1409.12	1379.58	2055.44	1389.39	1511.71	1017.39	1328.43	1148.02	1458.86	1314.59	950.117	1262.63	1412.13	1179.28	1199.13	1337.67	1020.73
K00677	lpxA; UDP-N-acetylglucosamine acyltransferase	17529	19070.8	12189.9	15401.1	12783.5	11518.7	14921.8	15493.3	19468.2	14989.4	15899.1	6956.44	17027.1	15550.2	16490.9	16391.3	10017.7	12265.2	16028.2	10980.1	13818	14099.6	14783.1	13900.4	14928.8	12867	10703.8	16107.4	13389.4	14984.9	10282.3	17689.6	9525.46	12583.7	10795.2	8900.43	12644.3	14990.7	8329.45	11953.5	10916.2	14178.5	16882.8	14279.6	17963.4
K00680	Unclassified	10196.4	11435.5	8126.11	8756.35	8461.04	7496.61	7661.06	9579.04	12556.4	9323.98	10027.1	13049.4	9945.11	10432.5	10073.7	10933.9	13905	8103.37	9015.5	8959.51	10350	8702.06	10575.9	7563.59	9182.19	9384.32	10559.1	9832.45	14230.1	10676.9	11123.9	9492.2	10210.7	9157.69	8297.65	9384.15	9665.34	8371.72	6425.47	9331.18	8493.54	7480.21	8878.28	9618.24	11482.5
K00681	ggt; gamma-glutamyltranspeptidase / glutathione hydrolase	3887.25	6826.64	5245.53	3765.06	4625.66	4168.69	4939.46	5049.69	5981.72	3814.83	5304.76	9369.01	4208.9	5306.82	5937.54	6060.8	9062.37	5787.37	4848.49	4079.02	5425.55	4828.11	6212.47	3633.14	3883.26	5258.48	6506.77	4856.94	5863.09	5450.07	8068.5	4207.67	5475.37	4257.51	4605.2	5411.49	4950.92	3919.36	3276.18	5126.84	5123.22	4377.89	4852.93	4573.12	4006.61
K00682	GGCT; gamma-glutamylcyclotransferase	0.360477	0.140913	0.0325478	0.390306	0.123028	0.165343	0.355039	0.428253	0.265628	0.149025	1.01913	1.05963	0.0840499	0.393024	0.121959	0.235489	0.314412	0.140913	0.101136	0.206767	0.0433843	0.0480622	0.100508	0.0379469	0.359625	0.279184	0.287301	0.20597	0.553402	0.476291	0.0947356	0.0921677	0.192453	0.103004	0.306602	0.0487834	0.235799	0.148759	0.122044	0.292739	1.78995	0.269813	0.0886025	0.0813312	0.34696
K00683	Unclassified	55.1222	53.9927	33.6657	54.9042	32.0236	37.188	49.2942	29.7286	64.0971	49.919	107.042	19.9604	64.2629	65.083	59.605	32.9691	18.8896	380.395	46.2818	30.7144	30.9907	67.3941	59.5326	37.3415	45.2558	41.0401	56.5095	28.8822	52.5689	541.072	25.8369	33.985	19.9919	36.3478	46.7966	28.675	38.0371	36.4538	104.947	49.9356	554.046	37.4548	55.5454	56.2367	56.9908
K00684	Unclassified	3091.39	3440.04	2449.86	2865.5	2533.19	2648.64	2980.68	2895.58	3847.1	2462.16	2784.24	2464.59	2802.49	3146.96	3504.54	3010.56	1651.49	3157.71	3292.6	2051.79	2547.76	2951.62	2470.12	3009.36	2526.76	2977.17	2581.9	3086.73	2680.56	3611.38	2467.07	3074.1	1901.95	3130.18	2547.25	1810.71	2563.05	2884.63	1870.19	2461.07	3360.7	2706.3	3409.65	2833.43	2956.63
K00685	Unclassified	53.2732	23.7172	96.55	33.2306	33.4641	32.6596	41.4956	89.6468	159.257	64.6363	67.3583	46.4744	157.389	122.864	44.3097	49.7578	14.626	134.328	53.2424	25.3512	36.2175	81.6433	70.5813	80.8682	51.2607	57.1952	60.7488	92.8215	60.4908	184.275	44.8272	72.1221	21.4219	54.019	52.2194	37.6179	99.7441	44.9621	31.8645	73.0383	161.89	164.235	58.2804	35.8069	53.2999
K00686	Unclassified	587.88	480.844	437.941	543.043	415.986	464.375	310.53	735.992	815.774	570.464	689.443	989.008	377.785	503.22	531.482	619.921	970.701	468.487	373.012	541.912	584.153	544.758	574.515	404.135	481.477	615.391	677.879	597.776	858.433	573.198	881.63	277.422	910.566	492.735	575.043	561.104	662.688	318.095	430.751	611.797	773.409	434.993	483.112	513.49	465.428
K00687	pbp2B; penicillin-binding protein 2B	2.19322	17.6409	20.0894	4.22232	13.27	7.16597	23.5169	4.45484	38.9763	7.43198	23.3994	50.7256	2.82664	20.0797	29.2832	12.253	261.455	1.54891	51.4354	8.83065	12.3257	6.58651	18.2084	3.97552	0.00547814	28.5878	112.511	17.1441	80.8874	19.5441	17.6509	9.64537	13.601	12.5691	18.6067	235.882	1.25487	19.7321	4.79943	19.8549	1.1485	4.42798	4.86287	14.9947	36.8969
K00688	PYG; glycogen phosphorylase	23494.5	24492.4	20563.6	22193.5	20279.6	19181.3	20276.7	24665.3	30920	20177.5	24488.7	25642.5	25656.2	21275.3	24287.1	25987	28808.8	19254.4	22710.3	19127.3	23349.6	21481.3	23203	22445.2	20516.3	21592	24431	24294.7	26005	24581.4	26079.9	25317.9	22150.4	20831.7	22932.9	18156	22226.5	22490.7	15894.4	22030.7	19629.4	18961.7	23899	22590.1	22797.8
K00689	E2.4.1.5; dextransucrase	26.4574	5.01112	8.05275	30.8674	24.9052	31.9415	19.3425	69.9742	87.5889	35.7061	12.2087	58.3403	29.4414	39.5893	77.8559	24.1947	125.825	6.96215	29.3409	83.8846	94.2501	20.377	51.9527	12.7323	17.1773	36.2099	62.5603	13.7051	145.131	39.906	104.862	59.3451	127.615	27.9227	19.0446	52.5547	45.4248	18.3607	42.0216	118.904	13.9337	43.5969	5.66876	60.8817	149.123
K00690	E2.4.1.7; sucrose phosphorylase	2222.92	1975.69	2181.75	2015.82	2077.24	2384.96	2103.81	2349.58	4373.75	1760.75	2120.14	3532.96	2766.04	1770.51	2330.48	2733.73	3975.03	1615.59	2189.27	2605.55	3249.24	2489.89	2558.05	1853.2	1721.08	2411.19	2800.01	2395.19	3866.24	2104.86	3206.79	2539.18	2448.91	2925.69	2628.96	2171.26	2424.68	2827.68	2342.87	3338.83	1726.63	1640.97	2038.24	2604.62	2198.62
K00691	mapA; maltose phosphorylase	4746.87	4440.12	2371.62	3363.99	2842.11	2819.32	2612.7	3112.39	4775.83	3533.28	3776.99	2294.25	4705.49	3826.32	3438.31	3547.76	5365.95	1326.37	2078.45	3218.76	3594.39	3069.83	4059.35	1991.66	4038.83	1996.36	2531.47	3233.24	4934.94	2412.4	2939.96	3274.48	3269.64	2879.76	1866.54	2921.51	2877.65	2600.87	1776.22	3461.9	1419.28	2920.25	2799.72	3005.48	5448.14
K00692	sacB; levansucrase	389.453	219.484	183.44	180.143	238.513	777.34	108.073	344.037	703.861	182.354	138.087	420.889	239.444	205.481	267.427	297.556	604.516	110.118	269.46	392.302	597.595	350.633	339.084	116.457	320.829	318.296	546.502	283.754	552.764	180.242	404.425	357.852	525.143	730.999	278.299	271.66	293.432	588.972	583.771	713.513	445.274	253.607	320.339	458.1	276.764
K00693	GYS; glycogen synthase	5.33172	0.15797	0.908801	1.92481	0.254065	0.608397	4.13333	0.696568	4.5059	1.41142	2.43623	6.96515	3.23277	3.7215	0.391017	6.2531	0.436965	5.49942	4.39022	1.19908	3.99273	10.7333	1.18802	4.1	2.52074	3.65305	1.59159	5.46848	3.3621	3.91844	1.93155	0.0309101	0.361905	0.255354	7.9002	3.26111	2.17538	2.0019	17.5	3.1215	16.4519	5.40416	0.688053	1.64842	0.777416
K00694	bcsA; cellulose synthase (UDP-forming)	655.923	519.732	499.145	438.539	512.362	418.887	488.447	672.849	1087.97	549.756	782.065	1341.36	604.045	651.254	708.858	707.418	1072.66	852.269	671.687	710.774	672.122	598.482	733.13	631.614	510.463	693.809	996.516	668.363	960.766	781.22	1015.82	468.526	790.95	740.779	677.753	666.723	720.88	585.732	455.745	767.039	969.525	580.664	613.155	738.309	863.329
K00695	SUS; sucrose synthase	87.0043	100.527	46.9785	108.499	41.6181	54.8498	69.1594	130.547	62.2805	42.5565	68.0361	58.8442	59.4255	37.5297	66.3034	73.1819	37.3577	42.2201	71.7183	42.8577	40.1458	64.1136	47.0354	31.7412	53.7194	66.6427	45.6062	68.729	27.8311	87.9853	56.0683	89.4058	29.8715	81.5839	110.999	41.232	100.584	100.727	36.6634	36.1105	113.389	55.2824	57.082	83.0844	55.4184
K00696	E2.4.1.14; sucrose-phosphate synthase	51.8876	8.00258	30.935	27.5135	4.09023	20.4396	21.715	8.02553	56.4414	18.7765	24.7816	34.1511	12.5901	26.7526	31.9904	29.7291	19.5855	22.9849	12.0145	10.8511	12.8458	65.3187	8.9167	15.4513	41.3052	35.1466	14.4514	44.0129	41.402	83.1558	19.4622	11.5115	10.6314	6.35506	13.1283	14.4575	23.3911	31.1146	18.0441	25.2612	63.5003	25.8649	11.4188	14.7065	32.0283
K00697	otsA; trehalose 6-phosphate synthase	106.328	74.5394	107.398	73.1716	60.8052	43.922	102.328	166.437	198.868	124.299	168.864	299.572	131.313	113.698	64.7409	93.2141	112.354	100.549	55.7433	66.2633	44.2424	97.1754	109.052	68.6346	210.075	85.3158	117.49	87.1092	168.316	162.036	85.2135	65.2049	69.8554	46.4789	165.311	64.9297	157.335	95.3787	56.128	93.3592	301.829	198.205	47.0851	114.422	79.9646
K00698	CHS1; chitin synthase	3.73731e-13	3.29286e-31	7.60579e-32	9.12068e-31	2.84993e-31	3.86374e-31	8.29657e-31	2.33327e-13	4.66655e-13	3.41992e-31	2.38151e-30	2.47018e-30	2.33327e-13	9.18421e-31	2.84993e-31	5.44664e-31	2.80128e-13	3.29286e-31	2.34348e-31	3.2693e-13	2.80128e-13	2.80128e-13	2.27995e-31	8.86746e-32	8.29747e-31	6.52398e-31	6.71368e-31	4.81312e-31	2.80128e-13	1.09577e-30	2.09025e-31	4.66655e-13	4.49726e-31	2.40701e-31	7.03133e-31	1.13997e-31	5.51017e-31	3.41992e-31	2.7873e-31	6.84074e-31	4.11697e-30	6.01752e-31	2.02672e-31	1.90055e-31	8.10777e-31
K00699	UGT; glucuronosyltransferase	6.34088e-07	2.47869e-07	5.72524e-08	6.86558e-07	7.71184e-05	2.90842e-07	6.24523e-07	7.53307e-07	4.67247e-07	0.000192631	1.79267e-06	0.000185362	1.47846e-07	6.9134e-07	2.14528e-07	0.000173615	5.53059e-07	2.47869e-07	6.13441e-05	0.000250466	7.63141e-08	0.000336499	0.000211714	6.67496e-08	0.000327637	4.91091e-07	5.05371e-07	3.62307e-07	0.000230434	0.000531041	0.000380356	1.62125e-07	3.3853e-07	1.81187e-07	0.000410954	8.58113e-08	4.14777e-07	0.000173462	0.000199092	5.14935e-07	0.00202831	0.00088519	0.000134791	1.43064e-07	6.10311e-07
K00700	GBE1; 1,4-alpha-glucan branching enzyme	20601.9	22367.5	18096.5	19708.9	18523.8	16501.4	18584.1	21482	27392.2	18404.1	22338.4	24680	22597.3	19604.1	21976.7	23623.2	26539.5	18215.1	20513	17529.8	21055.7	19668.8	20974.4	19266.1	18276.3	20405.4	22100.9	21737.4	24037.8	21992.1	23920.6	21413.9	20379.7	17989.8	20193.4	17095.3	20155	19528.7	14379.1	20239	17913.7	17136.1	20945.9	20278.5	20890.6
K00701	cgt; cyclomaltodextrin glucanotransferase	0.152145	0.425216	0.219732	0.788189	0.0801509	0.120002	0.126829	0.0997769	0.112884	0.459334	1.1068	1.46925	0.407612	0.44856	0.162894	0.159564	0.659594	6.75973	0.0880392	0.306994	0.241714	0.697125	0.133562	0.067517	1.96327	1.83188	0.544418	0.111206	1.97326	7.81023	0.722276	0.0774434	0.180167	0.0812456	0.19215	0.181139	0.24102	0.0854204	0.416756	2.15018	5.22566	10.591	0.075647	0.173728	0.125746
K00702	E2.4.1.20; cellobiose phosphorylase	2488.08	2023.72	2432.84	2418.72	2037.72	2148.54	1975.15	2761.68	3386.56	2180.46	2501.73	3574.7	2158.78	2596.57	2716.45	2439.3	3200.08	2007.28	2032.68	1897.1	2589.89	2251.86	2566.76	1920.16	2112.33	2693.89	2576.62	2461.82	3222.41	2805.81	3217.41	1560.31	3211.93	1733.78	2566.92	1786.05	2499.31	1902.76	1797.54	2164.59	2469.13	1762.35	1900.48	2113.88	2236.49
K00703	glgA; starch synthase	19879.2	20512.8	16799.2	18303.3	16810.1	15176.9	16775	20023.3	25739.4	17397.3	20449.3	20531.7	20747	18320.5	20211.4	21524.4	22563	15967.5	18858	16036.8	19217.2	18626.2	19208.4	17652.4	17192.8	18421.5	19331.8	20172.1	21521.9	19634.2	20708	19665.1	18412.5	16511	18538	15168.8	18632.9	17754.1	12976.5	18114.3	16013.7	16220.4	19629.7	18270.9	19764.9
K00705	malQ; 4-alpha-glucanotransferase	20923.5	22760.6	18824.1	20647.2	19111.4	16147.3	19543.5	22400.8	27986.5	19064.5	23363.1	24362.1	23778.7	19568.6	22321.6	25081.4	26791.8	18807.9	20945.9	18040.9	21995.3	20050.3	21668.1	19811.2	18608.5	20184.6	22522.2	22741.9	23534.8	22342.6	24375.7	22630.7	20558.6	17880.1	21171.9	17598.4	21241.7	20113.2	14718.6	20746.6	18034.8	17692.2	21505.7	21124.2	20966.4
K00706	E2.4.1.34; 1,3-beta-glucan synthase	8.36927e-28	3.27161e-28	7.5567e-29	9.06182e-28	2.83154e-28	3.8388e-28	8.24303e-28	9.94284e-28	6.16716e-28	3.39785e-28	2.36614e-27	2.45424e-27	1.95141e-28	9.12494e-28	2.83154e-28	5.41149e-28	7.29977e-28	3.27161e-28	2.32835e-28	4.71983e-28	1.00726e-28	1.00726e-28	2.26523e-28	8.81022e-29	8.24392e-28	6.48187e-28	6.67034e-28	4.78206e-28	1.27744e-27	1.0887e-27	2.07676e-28	2.13988e-28	4.46823e-28	2.39147e-28	6.98595e-28	1.13262e-28	5.47461e-28	3.39785e-28	2.76931e-28	6.79659e-28	4.0904e-27	5.97868e-28	2.01364e-28	1.88829e-28	8.05544e-28
K00709	ABO; histo-blood group ABO system transferase	0.0137984	0.0408059	0.0198377	0.00953274	0.00265722	0.021392	0.0116273	0.0192452	0.0240847	0.0318304	0.0172723	0.0144338	0.0191105	0.0238085	0.020739	0.0308382	0.00780486	0.0157044	0.0137119	0.0265527	0.0291163	0.0144811	0.0285387	0.0179674	0.0235406	0.0159407	0.0206021	0.0228722	0.0275615	0.0310661	0.0239627	0.0347065	0.0329733	0.00739444	0.016034	0.0220549	0.0271602	0.021236	0.0299924	0.0309435	0.0268803	0.151651	0.0305766	0.0266181	0.0249199
K00712	tagE; poly(glycerol-phosphate) alpha-glucosyltransferase	1230.94	511.66	289.135	82.3378	506.78	1797.65	341.768	374.644	1369.84	305.665	228.255	926.488	402.446	463.261	430.496	567.469	1222.05	74.0485	310.836	703.418	1164.8	174.248	672.908	221.315	418.805	293.302	814.351	413.474	1564.96	233.746	389.866	447.021	603.223	2204.05	159.431	697.848	261.952	1007.08	657.972	1077.17	292.209	256.265	604.154	788.852	373.408
K00713	waaD; UDP-glucose:(glucosyl)LPS alpha-1,2-glucosyltransferase	7.31799e-09	2.86065e-09	6.60749e-10	7.92355e-09	2.47587e-09	3.35661e-09	7.20761e-09	8.6939e-09	5.39249e-09	2.97104e-09	2.06892e-08	2.14596e-08	1.70629e-09	7.97874e-09	2.47587e-09	4.73174e-09	6.38284e-09	2.86065e-09	2.03588e-09	4.12696e-09	8.8074e-10	8.8074e-10	1.98069e-09	7.70356e-10	7.20838e-09	5.66767e-09	5.83247e-09	4.18138e-09	1.11698e-08	9.51945e-09	1.81589e-09	1.87109e-09	3.90697e-09	2.09108e-09	6.10843e-09	9.90346e-10	4.78693e-09	2.97104e-09	2.42145e-09	5.94285e-09	3.5766e-08	5.22769e-09	1.7607e-09	1.6511e-09	7.04358e-09
K00720	UGCG; ceramide glucosyltransferase	27.7167	16.9663	46.4646	16.8152	4.2255	19.8765	35.9505	71.2268	111.096	39.6419	49.9214	54.1994	101.668	64.4664	30.2729	33.5889	18.0352	40.2466	37.1619	19.6454	9.99581	32.1951	36.568	47.0219	21.7775	34.2723	59.5943	50.302	35.7963	75.2437	19.8585	30.7904	19.5524	14.5657	25.6331	20.6128	54.2257	13.5599	9.96787	26.6591	59.9954	66.7877	22.2883	29.0216	28.1546
K00721	DPM1; dolichol-phosphate mannosyltransferase	14742.8	16262.2	11790.7	13704.6	12119.8	10594.7	13385.8	14928.4	18574.1	13467.8	15296.7	13512.5	15656.9	13758.7	15276.5	15834.4	14655.6	11982.7	13775.9	11405	13661.9	13612.3	14444.5	12328.8	13155.4	13407	12854.3	14865.5	15133.7	13863.6	13436	14091.6	12638.9	12120.2	12075.7	10378.2	13271.8	13118.3	9342.55	13422.6	11555.3	12930.8	14431.6	13928.3	15411.6
K00728	POMT; dolichyl-phosphate-mannose-protein mannosyltransferase	21.8797	64.3607	33.6129	12.9398	6.85886	35.9808	17.206	27.4711	37.6961	48.0468	17.0107	21.2772	30.4541	34.6123	35.0218	48.2538	19.5829	38.5641	23.0529	42.4688	49.2593	26.2636	44.9255	29.484	34.5787	28.8918	33.8796	34.4664	43.9428	47.6683	48.5942	54.0633	55.5224	12.5521	26.7549	40.0358	42.3899	34.1028	47.0487	49.3471	41.5861	39.3461	48.4143	44.6589	36.4041
K00729	ALG5; dolichyl-phosphate beta-glucosyltransferase	8.47487	3.03316	0.684033	7.88494	2.59028	3.617	7.16797	8.73771	5.37278	4.13904	20.6305	21.4814	1.78755	8.61683	2.47849	4.84328	6.37024	4.72843	2.60571	4.1253	0.889925	1.21369	1.98315	0.770784	7.57338	6.42982	5.81471	4.16401	11.1913	11.697	2.60889	2.01673	3.89873	2.08927	6.57648	1.13749	4.88101	2.9698	2.42285	6.23846	43.1707	7.91598	1.75597	1.65614	7.01073
K00733	B4GALT7; xylosylprotein 4-beta-galactosyltransferase	0.0012016	0.000469715	0.000108494	0.00130103	0.000819039	0.00055115	0.00118348	0.00142753	0.000885439	0.00151972	0.00339714	0.00450792	0.00028017	0.0013101	0.000406533	0.001706	0.00104805	0.000469715	0.000662387	0.0020192	0.000144616	0.00194915	0.00145992	0.000126491	0.00293767	0.000930623	0.000957683	0.000686576	0.00306489	0.00440711	0.00233751	0.00030723	0.000641519	0.000343352	0.00320448	0.000162613	0.000786007	0.0014169	0.00146439	0.000975808	0.0167358	0.00560403	0.0010113	0.000271107	0.00115655
K00737	MGAT3; beta-1,4-mannosyl-glycoprotein beta-1,4-N-acetylglucosaminyltransferase	110.431	79.4013	87.9546	77.3512	65.8691	85.0676	67.1382	87.5771	94.2974	66.9474	85.8663	239.591	92.3646	85.8613	100.681	78.7257	132.391	59.9691	83.3358	58.7491	73.3479	61.1721	72.3848	68.9861	67.0551	142.19	148.689	76.0853	153.877	92.5203	87.057	99.0943	89.6063	43.8776	114.298	55.2137	43.1267	63.6585	65.3285	100.929	82.1049	61.2573	90.7916	120.122	71.9565
K00743	GGTA1; N-acetyllactosaminide 3-alpha-galactosyltransferase	1098.61	1015.54	627.18	790.07	947.037	891.951	1010.9	923.503	1386.83	873.76	773.066	548.344	814.666	899.781	1065.26	1129.6	431.147	997.523	1268.42	686.606	1038.47	769.979	680.841	1391.12	673.763	1013.25	769.665	1110.1	907.056	898.17	540.511	1257.3	487.167	1254.98	522.024	579.915	467.523	1063.09	486.995	812.815	714.382	794.946	1299.69	829.33	1060.86
K00745	Unclassified	8.55515e-07	1.08738e-06	7.69013e-07	2.3244e-07	4.7774e-07	5.9789e-07	6.9145e-07	4.84668e-07	6.35477e-07	7.83185e-07	7.67694e-07	3.56243e-06	8.98242e-07	6.14237e-07	1.02106e-06	9.5495e-07	2.46112e-06	4.75025e-07	5.38165e-07	1.06669e-06	1.56989e-06	4.09813e-07	8.38163e-07	4.28228e-07	5.48901e-07	1.08489e-06	1.97441	6.48211e-07	2.81207e-06	6.25414e-07	2.09409e-06	4.71822e-07	1.10641e-06	4.92474e-07	1.14192e-06	1.16999e-06	1.48873e-06	5.0263e-07	9.44262e-07	1.49748e-06	1.55449e-06	4.53591e-07	4.62191e-07	1.00882e-06	6.87553e-07
K00748	lpxB; lipid-A-disaccharide synthase	10112.5	11349.5	7453.97	8796.55	7487.36	6787.14	8822.84	9370.2	11612.2	8779.89	9285.48	4081.96	9679.45	9243.92	9818.33	9473.34	5764.21	7741.86	9488.22	6260.13	8078.42	8692.07	8843.34	7983.16	8891.7	7801.49	6230.58	9191.8	7772.75	9339.47	6143.75	10278.5	5546.85	7390.15	6476.23	5169.68	7654.55	8871.56	4907.3	7052.2	7178	8510.26	9830.35	8383.96	10358.8
K00749	Unclassified	7.3341e-131	2.86695e-131	6.62204e-132	7.94099e-131	2.48132e-131	3.36399e-131	7.22347e-131	8.71304e-131	5.40436e-131	2.97758e-131	2.07348e-130	2.15068e-130	1.71004e-131	7.9963e-131	2.48132e-131	4.74216e-131	6.39689e-131	2.86695e-131	2.04037e-131	4.13605e-131	8.82679e-132	8.82679e-132	1.98505e-131	7.72052e-132	7.22425e-131	5.68015e-131	5.84531e-131	4.19058e-131	1.11944e-130	9.54041e-131	1.81989e-131	1.8752e-131	3.91557e-131	2.09568e-131	6.12188e-131	9.92526e-132	4.79747e-131	2.97758e-131	2.42678e-131	5.95594e-131	3.58447e-130	5.2392e-131	1.76458e-131	1.65473e-131	7.05909e-131
K00750	GYG1; glycogenin	0.00023978	0.297385	0.500722	0.1866	0.31601	0.297401	0.000236163	0.148219	0.315959	0.000462836	0.279477	0.669601	0.166482	0.00026143	0.27888	0.186824	0.148143	9.37317e-05	0.000182919	0.316393	0.241844	0.2055	0.205299	2.52413e-05	0.0748246	0.111136	0.129634	0.241953	0.000801945	0.00131926	0.000781831	0.371319	0.000128015	6.85158e-05	0.205812	3.24495e-05	0.000156848	0.279225	0.000457194	0.000194723	0.00501956	0.00185219	0.223637	0.16648	0.000230789
K00752	Unclassified	946.557	786.583	605.201	615.645	532.39	432.753	549.748	708.848	852.784	507.954	789.505	1376.52	704.244	680.226	725.865	782.413	1285.48	760.097	553.173	754.324	683.682	692.48	843.023	466.344	576.752	802.49	994.279	739.802	1020.59	741.225	1261.01	685.24	915.029	709.678	720.755	634.865	882.648	564.794	737.222	981.677	984.904	618.56	724.93	615.52	604.735
K00754	Unclassified	7500.34	6716.6	5689.31	6759.24	5703.54	5528.38	4817.63	7084.6	11689.7	6226.35	7412.85	6745.55	8567.36	6344.48	7934.47	7320.5	9084.31	5047.44	6889.87	6775.4	7077.22	6265.58	8076.2	7252.13	5732.65	5706.05	7399.49	6638.91	9031.84	7898.71	7154.61	8501.71	6223.11	6678.24	7303.65	5502.76	5608.58	7663.76	5342.31	6991.37	5310.6	5142.69	7283.39	6806.93	9610.98
K00756	pdp; pyrimidine-nucleoside phosphorylase	3632.65	3814.86	3903.41	3640.72	4221.5	3353.81	3664.73	4801.19	6283.97	3518.41	4583.98	6763.16	4109.06	3480.29	4440.73	5097.94	7817.24	4005.09	3876.94	4003.86	5110.48	3801.77	4427.98	4081.13	3459.37	4788.88	5260.53	4208.1	6131.34	4610.91	6384.8	3901.75	5259.69	3934.92	4778.33	4379.26	4553.68	3779.23	3294.54	4751.32	4600.5	3469.97	3481.69	4270.7	4185.75
K00757	udp; uridine phosphorylase	16576.1	17769.7	14156.1	15243.3	13221.8	12309.7	13577	16686.4	20645.1	14099.1	16812	14530.7	16837.8	15251.3	16642.6	17543.7	16455.9	12981.3	15802	12695.5	15374.8	14998.1	15576.4	14152.7	14110.7	14461.1	15366	16573.8	15780.9	16112.3	16570.7	16680.4	14280.7	13115.8	14159.6	11659.5	14953.6	14699.5	9993.87	14310.4	12336.4	13428.3	16572.5	14949.3	16145.1
K00758	deoA; thymidine phosphorylase	318.076	325.639	280.641	355.255	282.775	255.082	255.981	462.312	465.738	349.211	513.264	840.604	281.995	316.269	323.454	457.592	614.849	329.328	248.624	354.616	377.431	392.829	306.702	273.036	313.61	329.038	521.953	353.357	518.45	341.514	603.478	235.091	589.278	316.635	422.947	367.343	464.855	208.205	281.555	442.811	596.123	300.067	331.581	404.554	295.021
K00759	APRT; adenine phosphoribosyltransferase	15623	15308.1	11992.3	13695.9	12701.5	11974.5	13040.9	14634.7	20007.4	13174.4	15154.6	16511.9	15356.3	14136.3	15196.3	16212.2	18200.1	11825.9	13748	12484.6	15329.8	13256.1	14853.5	12436.3	13210.4	14079.6	15029.6	15016.2	18073.2	14220.8	15870.7	14371.8	14106.3	13854.1	13338.7	11622.2	13904.7	13632.1	10126.4	14808.5	12581.2	12169.3	14574	14651.7	15374.6
K00760	hprT; hypoxanthine phosphoribosyltransferase	19886.5	20855	15989.8	17318.9	16174.1	16699.8	16164.3	19797.3	26159.3	16421.3	19779.7	20655.9	19725.6	17738.8	19621.2	21447	23648.4	16011.2	18376.2	15987.3	20008	17842.6	19062.1	16522.7	16710.7	17877.5	19953.3	19400.4	22373.2	19962.2	20619.1	19982.7	18479.6	18667.5	17263.3	15103.8	18015	18229.5	13715.6	19266.1	17223.6	15614	19386.2	18696.6	19321.8
K00761	upp; uracil phosphoribosyltransferase	18106.5	19328.7	15184	16288.2	14812	14329.3	14747.9	18495.2	23327.7	15155.1	18432.9	18537.8	18263.1	16404.8	18114.1	19383.7	21396.1	14171.8	16609.9	14583.6	17661	16455	17579.9	14866.3	15651	16271.7	17827.5	17603.5	20142.2	17670	19232	18322	16731.8	15529	16660.3	13878	17161.6	16260	11946.7	17102	14849.2	14630.9	17571.9	16994.4	17845.2
K00762	pyrE; orotate phosphoribosyltransferase	20835.7	22892.8	18039.5	19013.8	17948.6	17342.9	18241.8	21516	27703.1	17847.8	21653.2	23751.1	21989.7	19699.1	21698	23390.7	26039.4	18297.1	20340.4	17429.6	21440	19697.6	21012.3	18522.9	18245.5	19892.8	22010.6	21562.6	24005.6	22273.2	23852.6	22092.3	19857.2	18841.3	19553.3	16937.2	20098.8	19672.4	14489.5	20499.3	18711.2	17426.8	21251.3	20175.3	20799.2
K00763	pncB; nicotinate phosphoribosyltransferase	19743.8	20333.6	15577.9	16982.4	16292.5	15959.8	16000.2	19380.1	25017.8	16122.4	19037.3	19459.5	19266.8	17383.6	19012.1	21090	22955.9	15066.8	18156.6	15347	19579.6	16768.7	18295.7	17095.1	16313.7	17380	18981.8	19133.5	21335.8	18416.6	19587.5	20091.6	17099.3	17606.9	16663.4	14674.3	16842.8	17961.5	12306.8	17972	15370.2	15227.6	19247.1	17857.6	19224.4
K00764	purF; amidophosphoribosyltransferase	31060.4	34395.8	26069	28654.9	26035.4	24482.1	26445	31118.6	39435.1	26376.9	31758.3	31090.7	32932.4	28472.6	31719.9	33902.3	36212.9	25476	29526	24576.3	30021.6	28204.6	30137.9	27453.4	26993.8	28035.2	29952.7	31724.3	32777.1	31357.7	31939.8	32943.1	27225.8	25980.9	28000.9	23587.9	28738.9	28264.4	19828.9	28310.2	24935.5	25297.3	31583.5	28846.8	30905.9
K00765	hisG; ATP phosphoribosyltransferase	15203.5	17820.8	12970.1	14426.1	13196.1	12003.1	13229.3	16221.5	19509.8	13296.3	15913.2	15010.9	16389.5	14224.4	15827.2	16885.4	17614.1	13364.2	14794	12114.8	15090.5	13989	14726.3	14207.9	13428	13938	14387.3	15791.7	16236.2	16412	15879.2	16536.5	13531.6	12680.4	13863.1	11478.4	14207.2	14182.3	9706.23	13532.6	13890.4	12724.8	15846.8	14097.9	15682.7
K00766	trpD; anthranilate phosphoribosyltransferase	11929.4	13732.3	9614.73	11149.1	9542.39	9172.16	9720.85	12604.3	14616.9	10150.9	12174.2	10604.5	12508.3	10971.7	12031.1	12569.3	12427.9	9410.66	10783.4	8895.66	10739.5	10831.5	11221	10716.9	10751.2	9816.29	10514.8	11772.1	11085.9	11621.1	11555.4	12975.5	9890.87	9172.33	10187.1	8120.59	10442	10714.4	6683.05	9862.51	9670.98	9780.63	12100.5	10628.9	12141.5
K00767	nadC; nicotinate-nucleotide pyrophosphorylase (carboxylating)	11905	13101.6	8925.09	10604.6	9346.08	9099.48	9605.8	11775.6	13939.6	10240.8	11407.1	9899.71	11690.8	10805.3	11359.4	12056.7	10950.4	9765.04	10490.9	8630.7	10525.7	10490.2	10783.1	9681.33	10735.4	10109.7	9880.43	11714.9	11296	11751.9	10203.4	12218.1	9406.03	9587.07	9696.59	7637.79	10289.4	10230.7	7395.65	9796.9	10329.3	9623.13	11571.4	10434.1	11554.3
K00768	E2.4.2.21; nicotinate-nucleotide--dimethylbenzimidazole phosphoribosyltransferase	12959	15238.6	10948.6	12562.9	11562.5	10056.7	11949.7	14118.9	16304.2	11576.8	13404.4	13822.5	13712.4	11869.4	13541.3	14739.9	15692.4	11043.5	12873	10501.5	12918.3	11757.5	12920.1	11580.3	11384.1	12228.7	12437.6	13435.9	13754	13768.9	13748.5	13759.3	11789.2	10929.6	10993.1	10290.1	12001.8	11648.3	7863.19	11573.2	11196.6	10349.9	12613.4	12024.9	13936.7
K00769	gpt; xanthine phosphoribosyltransferase	2640.39	2738.71	1237.44	2161.87	1316.53	915.697	1364.76	1616.07	1909.47	2179.65	2231.77	448.253	2929.02	1903.04	1608.89	2180.27	2454.58	703.856	863.271	1557.98	1406	1596	2249.54	1127.54	2474.37	877.172	753.017	1986.46	1496.54	1156.78	1353.52	1908.44	1308.57	251.299	1045.42	1133.8	1666.04	1088.33	554.411	1166.29	566.59	1830.83	1570.65	1435.95	3070.06
K00771	XYLT; protein xylosyltransferase	9.20768e-05	3.59935e-05	8.31371e-06	1.45835	3.1152e-05	4.22337e-05	9.06879e-05	0.000109389	6.78497e-05	0.662411	1.85645	1.72552	0.531461	0.662475	3.1152e-05	5.9536e-05	0.53152	3.59935e-05	2.5616e-05	0.264488	1.10817e-05	1.06289	2.49216e-05	9.69281e-06	9.06977e-05	1.59182	0.531513	5.26111e-05	2.52127	2.91919	0.795899	2.35425e-05	4.91585e-05	2.63105e-05	7.68578e-05	1.24608e-05	6.02304e-05	3.73824e-05	0.53147	0.795951	1.32777	1.32738	2.21536e-05	2.07745e-05	8.86242e-05
K00772	mtaP; 5'-methylthioadenosine phosphorylase	1058.77	2231.64	1572.1	1133.13	1462.24	1376.03	1590.54	2389.38	2003.47	1362.09	1655.32	1966.96	1193.06	1543.36	1525.28	1901.91	1850.63	1717.9	1617.4	1083.68	1744.22	1462.96	1615.93	1257.45	1279.82	1478.01	1475.49	1223.52	1625.18	1766.02	2075.19	1764.42	1642.29	1148.92	1255.74	1171.23	1695.07	1461.24	992.337	1259.83	2057.88	1463.57	1266.58	1415.95	1473.8
K00773	Unclassified	18816.3	20393.8	16048.9	17285.3	15624.8	14834.5	16020.1	19385.7	24574.5	16231.3	19537.8	19032.8	19313.1	17539	19495.7	20376.7	21455.1	16065	18015.9	15131.8	18402.8	17676.1	18220.2	16436.3	16574.2	17535.6	18392.6	19032.5	20647.6	19909.7	19799.6	19599.7	16935.6	15566.3	17250.5	14411.2	17935.9	17267.4	12130.9	17365.4	16776.5	15930.3	18947.2	17743	19077.4
K00776	Unclassified	1.05089e-20	4.10799e-21	9.48856e-22	1.13785e-20	3.55542e-21	4.82019e-21	1.03503e-20	1.24847e-20	7.74378e-21	4.2665e-21	2.97104e-20	3.08166e-20	2.45028e-21	1.14577e-20	0.000311801	6.79492e-21	9.16595e-21	4.10799e-21	2.92359e-21	5.92644e-21	1.26477e-21	1.26477e-21	2.84434e-21	1.10625e-21	1.03515e-20	8.13895e-21	8.37561e-21	6.00458e-21	1.60401e-20	1.36702e-20	2.60768e-21	2.68694e-21	5.61053e-21	3.00285e-21	8.77189e-21	1.42217e-21	6.87418e-21	4.2665e-21	3.47728e-21	8.53412e-21	5.1361e-20	7.50712e-21	2.52842e-21	0.0604503	1.01148e-20
K00778	SIAT1; beta-galactoside alpha-2,6-sialyltransferase (sialyltransferase 1)	0.000693001	0.000563409	0.000259835	1.51754e-07	0.000606301	0.000303596	0.000217062	0.000130483	0.000390242	0.000390196	0.000303928	0.000606664	0.000216956	1.52811e-07	0.000390186	0.000823267	0.00272867	0.000346485	3.89917e-08	0.000217003	0.000173232	1.68681e-08	0.000303569	1.4754e-08	8.67456e-05	0.000217032	0.00108311	8.00827e-08	0.00047696	1.82319e-07	0.000216958	3.58355e-08	0.000476821	0.000433078	0.000433155	0.000736588	0.00103938	5.6902e-08	0.000346477	1.13819e-07	6.84998e-07	1.00122e-07	3.37214e-08	0.000649993	0.000433173
K00782	Unclassified	5154.16	5534.2	3583.72	4441.42	4443.65	4307.82	4809.28	5172.74	6647.67	4349.33	4285.33	2986.34	4327.82	4849.23	5622.67	4874.31	2348.54	4116.54	5766.32	3508.21	4655.02	4211.14	4022.92	5476.79	3924.01	4743.61	3950.79	5056.64	5192.63	5010.78	3098.11	6173.6	2746.18	5504.14	3497.66	2931.78	3531.39	5354.75	2784.67	4115.38	3886.35	4030.09	5632.18	4791.15	5545.76
K00783	Unclassified	18670.3	20359.7	15616	17049	15782.4	15147.8	15754.5	19285.5	24499.7	15978.9	19103.1	18870.6	19225.5	17444.9	19125.9	20484.2	21989	15498.1	17959.9	15159.3	18931.2	17121.3	18496.6	16382.5	16068.9	17021.5	18629.9	18806.1	20790.2	19204.9	19904.6	19586.9	17342.9	16800.8	16778.1	14518.7	17300.4	17237.6	12633.4	17774	16067	15233.3	18722.2	17550.6	18922
K00784	Unclassified	19039.5	19712.6	14726	16655.1	15960.5	15873.5	15819.6	18439.3	23643.9	15612.1	18279.9	17109.2	19275.3	17345.7	19522.1	19314.1	19287.8	13980	17909.1	14633	17834.5	16364	17536.8	17169.1	15509.7	16223.8	17487.1	18786.1	19324.6	17457.8	17671.5	19902.8	15508.4	17225.5	15826	13415.5	15230.1	17630.1	12028.9	17267.2	12722.2	14983	19139.4	17172.5	18866.3
K00785	Unclassified	1.84188	3.31753	2.2563	1.20765	0.142248	1.8166	1.32535	1.31704	2.79072	2.94501	1.2148	0.959463	2.0552	2.30681	2.20051	2.90704	0.437809	1.21745	1.4082	2.09342	2.40628	1.68263	2.33023	1.8742	2.64009	3.03424	2.36783	2.82345	2.7453	3.13077	1.9604	2.84059	2.62696	0.548152	1.90092	1.8118	2.49623	2.10447	2.43644	2.3885	1.90354	2.58618	2.85503	2.63849	2.37297
K00786	Unclassified	2281.07	2572.77	2412.37	2467.34	2945.24	1910.52	2821.27	2901.33	4042.35	2548.5	3289.87	3767.18	3391.91	2108.31	3047.16	3323.09	4669.69	2223.69	2782.55	2543.6	3230	2478.8	3154.6	2831.64	1927.79	2473.74	3114.59	2845.34	3171.11	2170.05	3268.96	2241.45	2894.12	2694.84	2595.78	2896.28	2446.25	2421.3	1939.45	3262.63	1427.07	1993.84	2421.11	2644.28	2921.26
K00788	thiE; thiamine-phosphate pyrophosphorylase	22338.6	24988.1	18160.9	21186.7	18501.5	17147.9	19638.9	22884.6	27316.8	19459.9	22067.3	18759	23167.6	21287.7	22754.9	23135.9	21987.5	18492.6	21125	16663.2	20786.5	19846.6	21275	18555.2	20206.3	19211.9	19121.8	22276.2	21738.3	22474.5	21200	23117.8	18605.3	17705.2	18163.6	15030.6	19565.1	20170.8	13529.7	18421.6	18720.8	18453.4	21639	20211.2	23377.1
K00789	metK; S-adenosylmethionine synthetase	21866.4	24306.8	18693.4	20100.8	18541.6	18040.3	18670.6	22818.1	28935.8	18869.4	22771.8	25047.8	22578.2	20783.9	22751	24340.9	27447.2	19059.2	21004.4	18487.3	22582.6	20666.9	21877.7	18714.2	19357.3	20874.2	22853	22422.3	26544.2	23672.1	24105	23083.9	21133.5	19659.4	20714.4	18259	21501.8	20290.3	15201.7	21396.9	20390.8	18078.9	22024	20719.5	21607.2
K00790	murA; UDP-N-acetylglucosamine 1-carboxyvinyltransferase	26324.8	28484.3	23690.8	24461.1	23455.8	22219.6	22498.2	28098.7	35953.5	23016.9	27858.8	33835.6	26685.4	25407.8	28163.5	29977.5	36930.1	23533.1	25238.6	23124.5	28639.4	24997.4	27222.5	23136.3	23030.4	26702.3	29643.8	27451	33724.5	28842.1	32356.1	26243.4	28768.2	24292.7	25653	23502.4	27106	24041.5	19201.7	27392.2	25643.4	22160.8	26194.9	25788.6	26555.2
K00791	miaA; tRNA dimethylallyltransferase	28941.2	30482.2	22557.2	25603.9	22350	21516.7	23787.3	27300.5	35206.4	24079.8	28142.4	24412.7	28512	25899.9	28268.7	29359.4	28342.2	21786.1	26449	21360.7	26126.1	25299.7	26151	23479.4	24388.9	24707	25141.6	27987.2	29050.7	27247.3	25523.9	28751.9	22829.8	23435.1	23481.1	19604.7	24878.1	25387.8	17384.3	24809.7	22398.3	23012.5	28400	25773.6	28349.8
K00793	ribE; riboflavin synthase	14264.8	16216.9	11564.4	13202.2	11664.5	11502.6	12273.2	14351.1	17595.2	12289.9	14378.8	11643.7	14526.5	13438.6	14612.7	15059.6	13592.8	11688.9	13734	10512.2	13111.1	12925.9	13950.4	12774.6	12468.8	12139.8	12544.9	14195.9	13349.5	14555.3	13135.5	15104.7	11304.9	11777.5	11759.9	9592.15	12283.8	13099.4	8647.69	12093.2	11841.4	11881.8	14718.4	12771.2	14606.5
K00794	ribH; 6,7-dimethyl-8-ribityllumazine synthase	14732.9	16122.2	11485.4	13044.6	11584.5	11527.1	12136.4	14375.7	17571.6	12287.4	14230.8	11336.3	14370.5	13233.2	14351.6	15077.9	13459.3	11564.1	13547.2	10494.1	13108.3	12763.9	13946.3	12621.1	12541.8	11981.2	12461.2	14037.3	13364.2	14354.8	12990.7	15083.3	11287.3	12288.9	11617.3	9437.83	12272	13153.5	8712.17	12229.5	11864.8	11927.3	14703.7	12785	14506.2
K00795	ispA; farnesyl diphosphate synthase	998.331	1057.14	1268.91	1228.49	1409.48	798.948	1355.05	1550.15	2241.71	1198.73	1573.49	1549.79	1681.53	1056.8	1419.76	1683.77	2096.29	1348.67	1338.32	1156.4	1656.24	1104.57	1497.43	1557.1	946.968	1258.88	1381	1405.77	1424.81	1203.45	1745.87	1302.86	1329.97	1347.11	1561.93	1446.3	1307.83	1153.77	926.355	1548.82	1058.47	1069.02	1158.34	1257.49	1230.04
K00796	folP; dihydropteroate synthase	13581.2	15154.6	10397.8	12436.7	10314.3	10160.9	10949.9	13839.2	16492.6	11564.6	13253	8329.99	13905.2	12141.2	13099.7	13433	11130.8	9990.72	12252.6	9467.49	11749.9	11754.1	12400.6	11747.2	11863.3	10563.2	10081	12693.9	11624.5	13066.1	10752.2	14998.3	9429.12	9860.69	10566.1	7898.72	10963.2	12460.3	7445.31	10227.1	10404.6	10915.3	13482.3	11546.4	13830.9
K00797	speE; spermidine synthase	5067.46	6224.83	5419.86	5215.74	5544.85	4735.51	5288.18	7028.43	7916.14	5343.05	6667.82	9433.6	5963.33	5201.58	6151.17	6885.09	9384.53	5612.54	5698.13	5314.41	6487.02	6089.22	6152.83	5233.42	5469.57	6081.38	7240.31	6029.21	7661.14	6092.51	8462.15	5545.06	7227.67	5204.9	6470.87	5704.15	6508.3	5266.62	4633.53	6499.62	6434.55	5066.67	5446.7	5941.72	5625.91
K00798	MMAB; cob(I)alamin adenosyltransferase	9698	10975.7	7073.61	8205.71	7235.58	6406.64	8190.31	8965.11	10834.7	8258.85	8865.5	4346.22	9146.23	8594.66	9365.56	9078.07	5965.87	7061.68	9087.28	6174.45	7650.17	8099.49	8062.16	7554.45	8277.89	7314.71	6202.45	8707.32	7653.3	8859.68	5991.46	9835.03	5541.55	7047.32	6065.28	4986.11	7272.68	8294.49	4687.7	6845.22	6610.64	7874.8	9364.36	8181.26	10244.5
K00799	GST; glutathione S-transferase	95.335	74.8519	135.888	40.1314	49.7694	64.7011	72.2673	125.103	258.801	166.567	140.307	220.904	257.936	147.823	117.904	121.299	55.5992	124.815	112.661	70.7811	53.2666	174.805	118.028	161.969	82.1647	106.326	150.973	132.853	144.576	264.203	102.236	168.231	50.2506	43.778	376.525	73.3096	128.581	45.7962	45.763	128.541	272.479	262.763	67.7962	59.4845	48.0037
K00800	aroA; 3-phosphoshikimate 1-carboxyvinyltransferase	18290.1	21072	15889.5	17334.1	16010	14695.9	16222.1	19256.7	23804	16227.6	19479.7	19385	19355.5	17328.7	19302.3	20675.8	21792.9	16273.8	17986.4	14946.8	18223.1	17458.8	18384.9	16594.4	16417.8	17275.1	18528.7	18948.6	19921.8	19713.8	19885.9	19458.3	16955.6	15406.1	17089	14470.1	17723.4	16931.4	12068.9	17023.4	16439.1	15481	18908.8	17461	18617.8
K00801	FDFT1; farnesyl-diphosphate farnesyltransferase	109.506	113.183	132.653	80.7578	70.5812	68.1301	121.768	151.336	225.637	200.37	212.05	67.7148	166.801	124.658	126.377	90.4811	52.9132	756.69	105.436	36.6263	72.7949	168.392	158.296	90.2166	280.392	69.653	115.26	89.2991	134.594	1075.17	83.8595	93.9652	45.9406	72.7802	94.9513	84.3452	193.701	125.079	193.751	79.7724	1034.06	265.381	86.8832	97.1918	91.3489
K00802	SMS; spermine synthase	3.15333e-05	1.23266e-05	2.84717e-06	3.41426e-05	1.06685e-05	1.44636e-05	3.10576e-05	3.74621e-05	2.32363e-05	1.28022e-05	8.915e-05	9.24695e-05	7.3524e-06	3.43804e-05	1.06685e-05	2.03891e-05	2.75037e-05	1.23266e-05	8.77264e-06	1.77831e-05	3.79511e-06	3.79511e-06	8.53482e-06	3.31947e-06	3.1061e-05	2.4422e-05	2.51322e-05	1.80176e-05	4.81306e-05	4.10194e-05	7.8247e-06	8.06252e-06	1.68352e-05	9.01046e-06	2.63213e-05	4.26741e-06	2.06269e-05	1.28022e-05	1.0434e-05	2.56078e-05	0.000154116	2.25262e-05	7.58688e-06	7.11458e-06	3.03509e-05
K00803	AGPS; alkyldihydroxyacetonephosphate synthase	362.061	394.544	398.454	335.706	280.941	301.08	326.393	348.386	532.052	245.352	372.765	770.681	369.429	323.562	370.093	478.039	851.237	344.365	347.053	367.012	453.593	284.313	343.147	262.621	261.615	469.578	487.558	408.538	590.094	412.081	779.39	322.178	414.117	242.036	370.851	323.315	446.033	311.577	272.827	408.203	536.938	246.333	257.061	364.05	291.102
K00804	GGPS1; geranylgeranyl diphosphate synthase, type III	0.0595045	0.0466301	0.0211327	0.00449329	0.0498393	0.0261534	0.0214179	0.0153415	0.0342273	0.0328541	0.0359824	0.0606045	0.0182982	0.00452458	0.0325733	0.0684492	0.221611	0.0292995	0.00115451	0.019671	0.0143381	0.00049945	0.0253732	0.000436853	0.0110071	0.0205447	0.0898313	0.00237117	0.0444228	0.00539829	0.0183604	0.00106106	0.0403042	0.0357824	0.0380606	0.0594082	0.0857464	0.00168482	0.0290504	0.00337007	0.0202822	0.00296452	0.000998459	0.0528635	0.0385909
K00805	hepS; heptaprenyl diphosphate synthase component 1	11779.6	10924.6	10272.5	10157.9	10018.2	10644	8604.91	13302.4	16139.4	9751.52	12714	18947.4	11174.7	10248.3	11629.3	13473.8	20382.6	10036.1	10172	10504.1	13106.3	10609.9	11878	10702.2	9673.2	11750.5	15309.3	11981.4	16229.4	12790.4	16759.2	10936	15362.6	12215.4	12367.8	11664.4	12338.8	10111.3	9130.68	13382.1	11769.6	8664.8	10995.7	11306	10715.3
K00806	uppS; undecaprenyl diphosphate synthase	19601.1	21267.1	16454.3	17672	16486.3	15900.9	16628.5	20158.3	25620.3	16748.4	20291.4	21089.7	20081.5	18460.8	20285.2	21654.9	23787.5	16983.1	18702.4	16064.4	19770.6	18027.8	19453.7	17152.8	16946.7	18285.1	20065.1	19835.7	22468.4	20756	21374.8	20217.5	18554.4	17511	17843.1	15597	18544.6	17997.9	13341.2	18896.8	17788	16097.9	19584	18524.4	19667.1
K00808	hss; homospermidine synthase	20.8597	30.7069	55.6148	11.9069	6.17323	21.4591	36.3038	59.6262	102.795	46.402	58.8336	39.8485	105.062	59.7163	36.6348	33.8433	7.78493	94.8379	40.6976	15.2803	10.045	61.5831	44.5821	56.7603	33.3509	40.5349	35.4373	54.7706	34.3538	127.268	20.4115	39.4506	15.1836	16.704	33.5116	27.8272	50.7239	14.1583	13.3543	43.2654	109.383	144.22	33.6304	24.8351	20.2226
K00809	Unclassified	747.948	924.21	489.752	458.162	654.901	476.918	536.344	502.014	727.481	598.291	541.925	325.316	566.295	575.264	554.149	455.444	312.025	563.078	407.38	435.659	387.196	1028.55	590.69	305.765	791.632	528.331	256.336	375.421	412.252	534.46	348.034	462.986	292.243	496.319	559.497	330.06	650.946	465.929	262.729	521.586	866.203	782.63	701.478	530.874	617.528
K00812	aspB; aspartate aminotransferase	22658.5	25076.9	17109	20061.5	16701.2	15325.1	18343.1	20352.4	25194.1	19033	21327.4	16103.1	21218.7	20602.9	21481.9	22335.9	18037.5	17058.1	20410.1	15758.7	18801.3	20008	19780.2	16566.4	19490.6	19030.4	17597.2	21648.2	20061.7	21047.8	18010.8	21228.8	16323	16392.8	16657.3	13996.7	19949.5	18460	12286.3	17667.6	18256.6	18629.2	21936.3	19564.2	21756.6
K00813	aspC; aspartate aminotransferase	246.411	127.58	263.964	142.796	239.63	117.904	148.619	110.961	421.764	283.672	250.226	291.402	151.348	196.79	141.713	249.678	362.134	281.415	120.967	167.981	292.336	174.651	389.317	106.551	286.304	317.091	262.019	194.646	312.471	336.519	307.361	191.895	164.397	206.926	307.252	104.237	221.728	192.064	144.79	183.214	355.644	208.497	187.437	242.032	194.819
K00814	GPT; alanine transaminase	0.0168228	0.00657616	0.00151895	0.0182149	0.00569159	0.00771626	0.0165691	0.0199858	0.0123964	0.00682991	0.047561	0.0493319	0.00392246	0.0183418	0.00569159	0.0108775	0.0146731	0.00657616	0.00468015	0.00948718	0.00202467	0.00202467	0.00455328	0.00177092	0.0165708	0.013029	0.0134079	0.00961227	0.0256774	0.0218836	0.00417443	0.00430131	0.00898146	0.00480703	0.0140422	0.00227664	0.0110043	0.00682991	0.0055665	0.0136616	0.0822199	0.252666	0.00404755	0.00379559	0.016192
K00816	CCBL; kynurenine---oxoglutarate transaminase / cysteine-S-conjugate beta-lyase / glutamine---phenylpyruvate transaminase	0.819682	0.32042	0.07401	0.88751	0.27732	0.375971	0.807318	0.973797	0.604008	0.332784	2.31738	2.40367	0.19112	0.893692	0.27732	0.529999	0.714936	0.32042	0.228038	0.462258	0.0986509	0.0986509	0.221856	0.0862869	0.807405	0.634831	0.65329	0.468353	1.25112	1.06627	0.203397	0.209579	0.437617	0.23422	0.6842	0.110928	0.536181	0.332784	0.271225	0.665654	4.00612	0.58555	0.197215	0.184938	0.788946
K00817	hisC; histidinol-phosphate aminotransferase	18582.1	21089.9	16470	17994.7	16311.8	14894	16876.9	19743.1	24137	16424.9	20175.6	19479.4	20194.4	18085.2	19581.2	20772.8	21760.6	16672	18432.5	14992.1	18760.1	17942.3	18465.3	17021	16708.5	17412.7	18772.5	19606.2	20732.3	20470.3	20040.2	20300.1	17024.4	15735.8	17809.5	14646.5	18243.7	17486.9	12282.2	17336.6	17840.5	15893	19283.3	17856.7	18797.3
K00818	E2.6.1.11; acetylornithine aminotransferase	8931.85	10398.7	6301.23	8194.73	7137.56	5971.34	7724.87	8097.57	9953.12	7697.55	8363.16	5388.24	9113.36	8288.41	8826.87	8701.1	6707.81	7087.51	8064.39	6125.73	7572.19	7565.68	7532.89	7371.58	7878.6	7076.32	6333.5	8679.01	8505.01	8836.38	5949.91	9089.45	5626.91	7268.47	6163.83	5395.1	7163.86	7848.45	4809.05	6806.6	7353.71	7284.16	8965.38	7788.8	9383
K00819	rocD; ornithine--oxo-acid transaminase	1326.08	1264.97	1020.15	735.089	717.665	725.224	780.485	779.291	1251.18	840.687	946.302	553.29	884.022	1080.79	1075.78	827.451	448.792	753.461	912.732	659.927	615.774	1561.12	893.254	490.445	1077.88	1451.15	819.336	973.672	934.399	958.389	525.266	776.223	539.011	750.327	932.975	427.55	1281.14	855.106	625.798	930.25	1157.26	1189.27	1208.04	1032.62	943.118
K00820	glmS; glutamine---fructose-6-phosphate transaminase (isomerizing)	18133.6	19900.6	16352.3	16734.3	15838.7	15127	15133.3	19571.9	24156.8	15610.8	18902.6	21194.8	18308	17256.6	19097.9	19929.8	23355.8	14681.3	16775.4	15150	18680.6	17316.6	18479.5	15078.7	15852.3	17008.1	19092.4	17863.7	21430.7	18665.2	21483.7	18657.7	18665.5	16034.9	17635.6	14764.7	17941.7	16592.1	12540.9	17734.2	16199.7	14822.8	17374.6	17661.5	17929.4
K00821	argD; acetylornithine/N-succinyldiaminopimelate aminotransferase	7869.48	9587.96	8391.67	7919.1	7629.87	7696.51	6568.73	9992.19	11446.3	7038.66	9432.65	12682	8692.59	7855.9	9094.69	10173.6	13356.1	8513.71	8469.8	7502.06	9360.91	8630.87	8772.14	8136.11	7443.52	8682.21	10669.6	9065.34	10271.2	10649.5	12380.5	9317.26	10389.7	7162.69	9689.9	8060.52	9087.78	8000.89	6551.61	8684.51	9563.66	7228.92	8619.29	8180.82	7643.92
K00822	E2.6.1.18; beta-alanine--pyruvate transaminase	6.97149	2.14449	5.24829	1.31072	9.42448	5.10612	1.42659	3.40127	10.3257	12.1043	6.14473	18.3822	9.92471	5.77848	8.3377	7.86895	4.77179	5.31856	1.02436	6.32076	4.18485	12.4104	4.83588	9.92064	11.1002	2.98957	7.58844	6.03932	6.62608	9.18289	8.52237	17.6709	3.69709	0.969619	8.67089	1.93573	4.17571	3.12117	2.11723	11.1357	29.8474	18.8525	0.908682	0.962422	1.4108
K00823	puuE; 4-aminobutyrate aminotransferase	849.999	835.871	794.737	737.97	886.468	1126.34	597.039	1360.99	1547.33	904.132	897.558	1402.8	644.613	751.465	835.701	923.578	1554.56	824.871	841.159	980.592	1325.26	878.709	1018.8	854.801	1196.65	937.35	1178.41	918.996	1446	939.605	1362.81	1182.22	1296.93	882.978	818.487	904.048	1174.63	1050.67	739.901	1268.84	1535.96	1177.55	797.66	1050.31	993.503
K00824	dat; D-alanine transaminase	1530.11	2877.09	1939.71	1401.33	1995.61	1657.64	2033.69	2591.23	2608.71	1611.55	2201.44	3245.08	1723.44	2252.52	2590.57	2418.76	3016.95	2132.01	2375.91	1744.87	2263.69	1791.08	2212.09	1810.28	1584.71	1710.36	2361.24	1672.24	2975.6	2146.32	3049.31	2294.6	2090.03	2055.37	1544.66	2169.4	1722.08	1820.57	1243.94	1821.97	1670.6	1680.52	1671.25	1930.05	2399.36
K00826	E2.6.1.42; branched-chain amino acid aminotransferase	20999.8	21085.4	16342	18060.8	15974.4	15872.1	16417.7	19252.1	25457	16904.9	20166	20595.7	20208.2	18509.2	20078.4	20740.7	22365.8	16455.2	18146.3	15651.2	18568.6	19085.7	18993.7	16851.8	17246.6	18487.1	19239.3	19830.1	22071.6	20435.4	19648.5	19708.2	17458.9	17277.3	18131.5	14801.2	18655.9	17500.8	12945.8	18701.8	17899.9	16252.2	20186.7	18365.9	19389.5
K00827	AGXT2; alanine-glyoxylate transaminase / (R)-3-amino-2-methylpropionate-pyruvate transaminase	0.971534	0.529441	0.211569	0.0107375	0.00335513	0.00454864	0.00976726	0.0392696	0.0622839	1.24913	0.0280366	0.0290806	0.0298004	0.73149	0.00335513	0.00641214	0.0416514	13.9846	0.00275889	0.044108	0.0341953	0.506753	0.0026841	0.00104393	3.89939	2.31948	0.00790377	0.00566632	0.573702	14.031	0.395618	0.0575119	0.00529446	0.00283369	0.00827773	0.00134205	0.00648693	0.00402615	0.00328139	3.16144	15.3013	20.6105	0.00238598	0.00223745	0.00954499
K00830	AGXT; alanine-glyoxylate transaminase / serine-glyoxylate transaminase / serine-pyruvate transaminase	103.458	222.241	71.7765	124.464	51.4177	159.557	148.888	90.6977	78.3228	85.1889	144.687	144.321	72.9422	176.465	160.155	119.317	74.2495	220.671	97.5369	46.8677	56.1738	130.287	104.352	94.9058	105.857	219.554	89.1577	123.966	154.326	198.694	114.507	89.7019	26.4657	49.1202	93.8088	76.4715	167.009	65.4127	57.303	105.381	305.323	177.211	125.795	64.027	91.7198
K00831	serC; phosphoserine aminotransferase	17917.8	19956.1	15422.1	16668.3	15416.4	13786.8	15580.5	18815.3	23458.6	15697.4	18636.3	18220.1	19089	16940.6	18649.2	19916.9	20360.9	14896.8	17608.9	14646.3	17743.5	16600.6	17548.5	16177.1	15720.1	16269.4	17780.5	18370	19591.7	17808.5	19023.5	19194.7	16224.7	15281.7	16686.1	13989.2	17055.4	16568	11730.9	16275.6	14379.1	14910.3	18311	16945.1	18144.4
K00832	tyrB; aromatic-amino-acid transaminase	1014.67	1692.35	1391.47	765.21	1185.12	860.564	1127.86	1691.07	1982.67	1045.29	998.065	842.908	930.857	1144.77	1279.95	1391.98	1324.63	1278.22	1414.87	792.69	1543.79	981.581	1639.44	978.535	928.155	1076.83	988.958	822.363	1035.15	1154.32	1381.81	1815.96	888.202	1026.61	871.248	741.276	965.773	1330.51	726.624	918.016	1087.41	1037.21	963.587	1171.68	1380.22
K00833	bioA; adenosylmethionine---8-amino-7-oxononanoate aminotransferase	11294	14262.9	9352.18	10774.1	9633.26	8845.64	10712.7	11947.8	13799.4	10008.1	10850.6	8446.97	11861.7	11260.8	12212.5	12227.9	9541.72	10290.3	11891.9	8103.05	10612.8	10043	10918.2	10423.1	10224.7	10063.5	9235.87	11975.6	10095.5	11772.3	9750.25	12467.9	8357.22	10020.2	8379.42	7188.79	9743.93	10792.5	6760.4	9108.2	9513.74	9892.58	12189.8	10214.1	12389.2
K00835	avtA; valine--pyruvate aminotransferase	9.9217	3.9217	2.07399	6.32534	1.17988	1.53398	10.2257	1.58955	1.62344	12.7516	140.206	10.3552	4.23876	4.57425	1.94861	2.9544	5.79114	611.927	28.7145	2.34249	3.33742	15.9889	1.58178	0.741135	8.89315	13.1233	56.4786	2.62777	43.9378	944.892	5.26859	0.900972	2.73772	1.8722	66.0346	2.52398	7.9064	1.9912	152.556	5.50895	911.047	19.0055	9.19449	2.11413	1.85071
K00836	ectB; diaminobutyrate-2-oxoglutarate transaminase	240.009	128.597	168.309	189.867	146.334	111.733	132.78	212.248	351.635	151.256	181.618	460.602	139.577	182.423	231.324	189.149	406.393	152.018	117.841	154.238	196.884	143.542	180.648	167.446	168.218	217.95	241.534	163.195	312.322	222.658	313.772	116.971	298	104.429	236.82	199.338	147.84	128.165	141.881	147.027	208.852	116.407	126.648	143.114	205.459
K00839	pucG; (S)-ureidoglycine---glyoxylate transaminase	100.287	38.9707	100.605	78.5222	52.7785	7.19705	60.3182	73.0997	68.7008	37.4445	73.0798	98.331	78.6044	23.7635	17.0233	66.6718	268.251	50.5482	18.9539	22.0987	93.159	148.78	83.8283	15.7083	87.7746	62.3074	69.2633	66.0085	174.903	42.0663	81.8407	102.837	38.1572	48.1197	129.314	33.6941	68.057	97.7334	33.4043	65.355	92.5399	55.661	65.5262	141.616	5.7389
K00840	astC; succinylornithine aminotransferase	7.85359	11.7796	0.975972	0.00142005	0.715624	6.16806	4.11293	0.00155812	2.74206	8.02518	8.51757	0.00384598	0.911548	4.27443	6.00398	8.80529	0.00114393	8.71044	16.4736	2.74183	2.74125	12.6877	6.85309	9.98129	0.00129188	6.48897	0.847676	9.82055	0.781794	16.6174	4.11197	5.54457	0.000700206	5.03838	97.2587	4.11182	7.69543	0.58649	0.000433971	3.42743	4.6394	3.05772	6.03376	7.9282	0.00126235
K00841	patA; aminotransferase	4222.13	2466.88	2297.25	1797.07	2812.75	4540.66	2060.87	2642.79	5575.84	2276.69	2222.78	3953.82	2754.56	2242.46	2442.32	3461.86	5759.32	1538.22	2481.56	3095.32	4652.54	2560.82	3834.5	1793.45	2269.65	2659.24	4069.56	2605.35	5063.17	2013.35	3202.66	2812.79	3623.38	6255.33	2499.78	3008.37	2418.64	3939.49	3477.9	4932.92	2249.58	1921.46	2935.19	3546.48	2756.77
K00842	Unclassified	316.324	406.585	373.333	271.506	418.948	402.606	282.797	720.09	524.99	369.006	447.315	846.796	319.421	301.825	383.461	459.999	844.502	411.296	430.859	360.836	464.396	291.652	540.162	588.597	454.805	490.804	523.506	336.722	497.368	360.848	746.857	743.544	493.706	339.873	519.898	432.844	400.082	399.86	284.231	400.7	449.071	250.828	318.148	356.746	323.431
K00844	HK; hexokinase	1066.57	993.802	970.408	1009.83	788.396	944.293	803.608	1550.31	1396.43	1003.01	1175.47	1710.59	1017.8	1178.29	1117.73	1129.73	1441.19	1149.72	937.392	843.553	1070.39	1196.83	1143.83	1037.26	1017.75	1392.77	1248.58	1353.14	1494.29	1540.61	1323.58	1234.8	1507.17	742.282	1023.18	852.083	1296.13	843.315	716.672	1095.34	1444.58	904.23	862.518	954.598	940.2
K00845	glk; glucokinase	37012.2	36661.5	27452.4	32688.9	27496.5	25552.2	28075.8	33361.5	43868.8	30722.6	36033	31780.1	38764.4	32203.3	34427	36838.9	41570	25868.9	30405.2	27972.6	32036.3	31408.2	34138.9	29301.2	31943.4	30428.3	31485	35856.4	37377.2	34441.6	34263	35224	30653.9	26096.5	29820.5	25425.6	31279	30299.1	21066.8	30808.4	27200.5	28545.3	33901.6	30836	37465.6
K00846	KHK; ketohexokinase	0.402273	0.157668	0.0365779	0.436145	0.136311	0.184698	0.396519	0.478066	0.296554	0.163458	1.13735	1.17956	0.0939892	0.438605	0.136367	0.260343	0.351472	0.157606	0.11216	0.22695	0.0486008	0.0487046	0.109105	0.04262	0.396343	0.312751	0.321004	0.230014	0.613981	0.523263	0.10025	0.103006	0.214985	0.115213	0.33584	0.0549622	0.2632	0.163822	0.13321	0.326871	1.96524	0.287389	0.0972188	0.0917444	0.387415
K00847	E2.7.1.4; fructokinase	24596.7	24973.3	18778.1	21932.1	19435.9	18102.6	20463.4	23348.5	30550.6	20983.5	23831.2	21736.5	25493.1	21836.2	23878.6	25593.2	25641.6	18647.8	22489	19177.2	23103.1	20948.2	23258.9	19779.9	21018.1	20791.8	21618.2	24618.1	25442.6	23285.8	22378	24809	20099.4	20209.2	19909.6	17716.8	21291.6	21459.8	15110.7	21695.2	18497	19128.4	22970.5	21659.5	24011.7
K00848	rhaB; rhamnulokinase	11888.4	12410.7	8030.88	10477.1	8858.21	7700.72	9154.86	11500.6	12969.4	9935.07	11051	8219.96	12316.2	10166.2	11035.3	10745.6	10191.3	7669.77	9903.83	8070.44	9562.78	9440.43	9791.03	9342.13	10200.7	9026.74	8369.96	11167.4	11078.9	10318.3	8755.99	11861.6	8487.53	8291.11	8570.24	6732.62	8928.98	9863.25	6102.73	8870.68	7637.61	8596.32	10383.6	9338.17	12025.8
K00849	galK; galactokinase	17614.8	17220	13811.3	15586.6	14145.6	13713	14435.7	16745.9	22208	14447.7	17463.6	16596.3	18104.7	15409.7	17267.6	18243	19819.2	13143.4	16230.2	13683.7	16780.3	15171.6	16442.5	15070.3	14700.9	15159	16849.6	17373.1	19128.9	17399.9	16889.7	17884.2	14884.7	15393.6	15502.4	12716.3	15089	16118.5	11355.7	16081.7	14015.7	13491.1	17051.8	16081.7	17449
K00850	pfkA; 6-phosphofructokinase 1	46715	50105.2	39474.9	42525.2	39776.1	37261.3	38598.6	47005.4	58895.4	38332.1	48303.9	50574.6	48763.1	42170.1	47432.8	50197.5	56592.4	38898.7	44028.9	37383.5	44414.3	42942.5	43984.8	42860.4	39670.1	42826.1	47052.2	47548.2	49079.5	48912.4	50172.1	48784.5	42035.8	40033.5	44559	36078.6	42952.3	42533.9	30064.7	43385.4	39133.5	37428.5	47753.5	42348.4	45515.2
K00851	idnK; gluconokinase	1401.61	905.529	739.983	597.044	902.838	1860.45	636.767	1417.12	2601.73	774.98	962.867	1904.59	983.333	926.512	1113.63	1156.95	2603.58	780.017	971.878	1276.37	1694.59	992.007	1292.32	840.571	954.529	1033.5	1703.44	899.138	1933.21	1243.75	1510.62	1262.65	1469.76	2254.43	944.761	1510.65	897.281	1483.42	1109.41	1825.72	1302.22	812.012	861.19	1252.8	1345.75
K00852	rbsK; ribokinase	9735.91	9371.37	8402.67	7382.4	8162.62	8758.21	7491.78	10675.3	13079.2	7458.85	9526.75	16180.6	9267.79	9524.39	10084.5	10065.3	15993.6	9265.67	8461.19	8735.93	10460.6	9265.42	10220.8	6860.43	7953.59	10655.5	11990.3	9637.98	14933.7	11608.3	13571	9346.63	12104.5	9313.99	9683.58	9255.48	9637.16	8588.4	7428.09	10998.1	10452.1	7406.62	7599.07	8868.65	8801.12
K00853	araB; L-ribulokinase	1233.59	1857.77	1273.47	1088.89	1308.26	1030.05	1111.89	1533.04	1509.12	1285.72	1585.24	2764.54	1604.12	1437.69	1617.14	1752.92	2391.94	1549.82	1214.11	1488.7	1677.46	1637.14	1457.58	1015.93	1187.06	1792.99	1981.08	1535.15	2355.27	2098.69	2422.94	1557.37	2276.74	1213.24	1556.78	1598.78	1770.14	1237.33	1554.63	1973.01	1923.04	1323.16	1225.6	1474.17	1366.11
K00854	xylB; xylulokinase	17989.4	19259.9	15931.2	16675.2	15143.1	13731.1	13967.3	19797.3	22057	15085.4	19995.7	24618.4	19656.2	16927.1	18156.8	20012	25813.7	15628	15918.2	15342.9	17561.7	18039.2	17888.3	15462.6	15913.9	18714.9	20214.3	19206.1	20466.1	20308.2	24101.7	18004.9	19941.6	13929.2	18158	15498.4	18638.9	16304.7	12533.6	17904	19023	14666.5	16967	16613.7	16603.9
K00855	PRK; phosphoribulokinase	45.2925	23.4032	57.929	38.0857	24.0999	24.0395	51.8777	82.8611	116.207	57.9241	110.4	112.319	122.269	84.6189	44.8439	38.7554	37.5144	41.8042	41.4417	33.4069	13.1989	41.5863	42.8699	54.931	52.6503	53.3729	58.7937	65.7468	80.3581	115.93	29.3138	47.633	29.7438	20.4822	105.323	28.4722	61.4033	23.9415	24.152	55.4589	181.206	100.723	28.1787	22.993	45.7273
K00856	ADK; adenosine kinase	826.179	746.719	651.274	744.558	442.278	687.234	583.166	930.803	1076.65	589.175	802.478	828.419	597.52	843.539	775.818	663.062	706.66	819.768	493.61	427.217	569.307	694.299	812.371	596.278	591.565	756.753	550.963	787.132	781.027	837.127	717.914	513.185	623.168	527.326	742.077	490.657	850.886	471.753	364.536	550.904	1160.3	643.452	649.845	413.716	624.12
K00857	tdk; thymidine kinase	13809.4	13722.9	10093.3	11982.7	10782.4	10118.1	11402	12782.2	17370.5	11524	13188.7	11758.4	13441.7	12284.2	13155.5	13961.8	13671.1	9838.01	12231.6	10529	13060.6	11252.6	12485.5	10694.8	11445.3	11884.9	12060.3	13093.8	14980.2	12274.8	11948.3	12826.4	11147.1	11998.8	10925	9769.96	11681.3	11770.3	8430.12	12369	9952.93	10523.7	12731.1	12270.6	13736.9
K00858	ppnK; NAD+ kinase	19653.1	21041.5	16164.7	17398.6	16331	16130.2	16555.2	19862	25154.1	16503.4	19748	20347.6	19757.9	18066.2	19741.3	21287.4	23172.3	16315	18217.6	15632.1	19527.4	17611.4	19072.3	16707.2	16735.6	17789.9	19537.5	19415.8	21912.5	20175.6	20625	20085.9	18020.4	17594.3	17572.2	14997.9	18130.8	17881.9	13016.7	18554.9	17249.6	15787.1	19412.4	18414.2	19255.2
K00859	coaE; dephospho-CoA kinase	19680.1	20727.3	15985.7	17365.1	15994	15495.1	16470.8	19709.1	25318.6	16666	19899.4	18428.3	19639.6	17854.3	19688.4	20718.8	21208.3	15487.9	18440.6	15409.3	18871	17651.6	18812.6	16354.1	16686.2	17381	18378.8	19083.8	21289.3	19384.8	19209.4	20209.3	16957.8	16939	17199.6	14391.5	17627	17922.6	12600	17977.1	16051.7	15944.8	19095.7	18157.8	19380.2
K00860	cysC; adenylylsulfate kinase	8359.01	8142.66	5508.68	7005.31	5589.99	5123.35	6440.18	6534.2	8801.17	6496.74	6945.43	4438.76	7765.08	7055.35	7299.15	7503.47	5633.37	5326.73	7187.23	5222.24	6107.45	6583.29	6296.1	6396.91	6739.59	6330.84	5352.98	7954.04	6583.48	6796.33	5026.4	7532.1	4573.91	5627.87	5008.14	4296.02	5974.02	6432.14	3435.63	5563.19	5016.77	6335.38	7817.4	6434.12	8129.6
K00861	RFK; riboflavin kinase	0.00319308	0.0012482	0.000288307	0.00345731	0.0778135	0.0014646	0.00314492	0.00379344	0.00235292	0.193243	0.0090274	0.192459	0.00074451	0.00348139	0.0010803	0.174885	0.00278504	0.0012482	0.0619203	0.251355	0.000384296	0.33606	0.211938	0.000336132	0.329432	0.00247299	0.0025449	0.00182447	0.233831	0.533193	0.380147	0.000816417	0.00170474	0.000912407	0.41218	0.000432121	0.0020887	0.174117	0.199498	0.00259307	2.03632	0.885055	0.135108	0.000720428	0.00307335
K00862	Unclassified	240.066	262.622	237.499	295.835	237.31	190.218	194.637	370.913	394.401	299.885	391.03	605.142	225.94	258.208	271.29	377.1	511.1	274.076	211.971	294.353	323.642	308.127	251.996	238.805	234.078	265.73	423.627	311.134	403.152	244.772	542.142	168.14	531.558	283.312	285.774	323.595	368.229	150.072	236.191	363.074	371.936	229.364	290.129	319.045	233.093
K00863	DAK; triose/dihydroxyacetone kinase / FAD-AMP lyase (cyclizing)	1502.73	1192.31	1105.88	1038.68	1243.51	918.014	855.886	1806.48	1907.78	1119.46	1662.93	2822.75	1126.64	1586.4	1798.29	1364.2	2350.12	1337.94	899.112	1280.13	1359.22	1170.44	1555.94	994.377	992.157	1250.11	1628.44	1216.14	2358.96	1630.96	2325.93	781.238	2059.35	1233.94	1496.04	1486.25	1216.94	858.451	828.419	1257.28	1318.79	843.698	720.59	1081.46	1370.63
K00864	glpK; glycerol kinase	12113.1	12628	11385.7	10818.3	10390.1	10754.5	9829.97	12836.5	16849.7	9872.8	13178.8	17439.5	12775.4	11258.4	13068.1	13836.4	18523.5	11274.8	11645.7	10874.3	12987.5	12415.2	12860.9	10448.8	10500.8	12673.8	14795.2	12634.9	15714.5	14025	16157.4	12334	13670.3	12056.5	13135.9	11601.9	13039	11551.5	9481.15	13812.4	12396.2	10368.2	11997.4	11806.7	11295.6	multidrug resistance protein, MATE family
K00865	glxK; glycerate 2-kinase	14175.6	13450.8	10177.9	11890.2	10413	10632.4	10482.5	12897.2	17309.1	11151	13221.3	11670.5	13765.3	12088.9	12936.8	13464.7	13995.6	9742.62	11722.2	10068	12217.5	11491.8	12369.3	11569.6	11632.6	11362.4	11994.3	13041.3	14630.9	13009.4	12235.7	14283.4	10844.6	11720.9	11607.3	8925.96	11162.1	12410.9	8247.32	11585.4	10147.4	10332.5	13003.3	11850.5	13524
K00867	coaA; type I pantothenate kinase	1173.74	750.19	436.088	330.224	641.672	1451.34	474.573	718.54	1844.11	616.826	440.112	1335.56	671.67	825.33	914.761	826.948	1820.39	259.282	659.034	1104.91	1549.03	530.166	984.209	353.633	628.576	672.424	1305.53	596.865	2401.77	624.514	915.178	936.925	1237.29	2090.01	515.98	1180.4	617.058	1114	1133.18	1696.33	627.978	548.213	685.6	1065.4	1152.01
K00868	pdxK; pyridoxine kinase	13879.3	15961.1	12856.7	12874.3	13577.3	12797.1	12786.2	16243.8	20271.8	11881.5	14824.5	18197.6	14349	13585	15842.8	16717.7	18892.5	12974.6	15281.8	12542.8	15981.7	13232	14177.2	14415.6	11745.6	14059.3	16641.9	14804.7	17874.9	15145.1	17874.6	16525.6	14503.1	15353.9	14019.6	12987.2	13784.9	14347.2	10344	14637.8	12452.3	11352.6	14967.5	14123	13872.2
K00869	MVK; mevalonate kinase	2406.27	1211.11	1072.22	672.429	1127.26	1958.68	774.821	1050.13	2693.75	1001.54	1040.39	1541.58	944.58	1405.86	1504.35	1151.89	2349.48	493.931	1046.83	1518.95	1879.47	1544.45	1385.72	427.215	1226.11	1611.91	1731.54	1056.25	3141.95	1197.29	1219.97	1184.42	1555.87	2699.39	972.24	1359.12	1313.21	1500.85	1335.05	2411.41	1263.43	1443.24	1472.56	1692.91	1674.64
K00870	Unclassified	61.1706	5.35673	112.32	52.946	43.5493	15.2939	40.0544	10.311	160.792	138.522	8.64947	15.609	4.43963	12.2669	10.1524	10.6127	127.242	10.0571	18.3227	12.4682	88.5288	22.9707	283.123	13.5286	126.418	85.6553	23.9937	38.3898	18.4556	9.82838	8.91629	2.10679	29.9486	18.4489	27.1329	1.98889	5.9896	67.5049	1.57203	4.14548	8.38815	4.55465	10.2721	31.8916	25.1827
K00872	thrB; homoserine kinase	4701.63	5383.77	4772.35	4136.33	5174.69	4347.31	4968.29	5549.67	8107.56	4319.59	4907.69	6685.63	5114.33	4372.48	5273.69	6029	8509.26	4364.65	5140.74	4652.16	6608.34	4767.14	5749.08	4500.92	4267.61	5103.07	5761.07	4591.1	7544.52	4631.86	6667.99	5303.63	5460.79	5937.96	5236.84	4838.55	5088.35	5254.78	4000.27	5803.89	4988.91	3926.98	4576.86	5453.09	5326.23
K00873	PK; pyruvate kinase	20592.4	22009.2	17034.7	18330.4	17111.9	16390	16904.8	20290.5	26524.4	17248.9	20918.5	20883.8	20725.9	18745.5	20767.7	22107.2	24376.8	16242	18855	16515.3	20269.6	18458.5	19941.3	17455.3	17735.8	18696.6	20162	20331.9	22753.2	20434.9	21474.8	21044.2	18499	17646.2	18917	15834.9	18959.2	18459.5	13492.9	19111.9	17212.3	16668.9	20059.6	19081.7	20293.6
K00874	kdgK; 2-dehydro-3-deoxygluconokinase	20650.3	22416.4	16168	19082.1	16443.2	14979.2	17049.3	19719.8	24074.9	17667.6	19947.6	21111.5	21018.6	18595.1	19814.6	21917	23913.4	16462.3	18385.8	15914.5	18865.4	17205.5	19071.6	16697.2	17614.5	18734.8	18732.8	21354.2	21221.2	21168.1	19656.1	20651.9	17645.1	15221.1	17315.5	15311.1	18521.5	17086.2	11744.4	17615.4	16623.2	15917.8	18914.3	18412	20358.4
K00875	rbtK; D-ribulokinase	0.406764	0.000256617	5.92729e-05	0.000710787	0.000222099	0.000301106	0.000646563	0.25432	0.507565	0.000266519	0.00185594	0.00192505	0.253694	0.000715738	0.000222099	0.000424464	0.304969	0.000256617	0.00018263	0.355622	0.304475	0.304475	0.000177679	6.91053e-05	0.000646633	0.000508422	0.000523206	0.000375093	0.305398	0.000853949	0.000162896	0.507249	0.000350477	0.000187581	0.000547961	8.88397e-05	0.000429415	0.000266519	0.000217218	0.000533108	0.00320841	0.000468953	0.000157945	0.000148113	0.000631849
K00876	udk; uridine kinase	31355.5	33255.7	25109.3	28731.3	25656	23262.9	26121.9	31272.5	39293.3	26792.9	31144.7	29204.7	31993.4	28250.5	30863.1	33266.1	33634.1	23862	28892.6	24677	30046.3	27312.8	29714.8	26341.8	26652.8	27863.9	28836.8	31249.8	32903	29567.5	30651.1	31594.3	27465.3	26078	26316.2	23008.5	27963.3	27393.6	19696.4	28212.6	23631.6	25120.6	30407.1	28283.6	31180.6
K00877	THI20; hydroxymethylpyrimidine/phosphomethylpyrimidine kinase / thiaminase	0.000298658	0.000116747	2.69661e-05	0.000323371	0.000101044	0.000136988	0.000294153	0.000354811	0.000220075	0.000121252	0.000844357	0.000875796	6.96361e-05	0.000325624	0.000101044	0.000193109	0.000260493	0.000116747	8.30874e-05	0.000168427	3.59443e-05	3.59443e-05	8.08349e-05	3.14393e-05	0.000294185	0.000231306	0.000238032	0.000170648	0.000455854	0.000388503	7.41093e-05	7.63617e-05	0.000159449	8.53399e-05	0.000249294	4.04175e-05	0.000195362	0.000121252	9.88229e-05	0.000242537	0.00145966	0.00021335	7.18568e-05	6.73836e-05	0.000287459
K00878	thiM; hydroxyethylthiazole kinase	4668.74	5521.44	5029.25	4612.7	4844.3	4997.02	4298.09	6404.65	7352.97	4238.39	5515.67	8235.61	5122.33	4876.09	5714.08	6048.38	8527.8	5550.49	5058.05	4677.89	6156.78	5172.58	5652.49	4617.54	4557.63	5306.78	6649.79	5161.54	6849.66	6211.68	8092.52	5507.19	6390.33	4663.55	5828.82	5096.63	5599.83	4944.15	4109.07	5478.42	5783.16	4227.19	4698.33	5206.47	4731.47
K00879	fucK; L-fuculokinase	1139.34	706.462	775.525	844.578	693.183	911.252	532.027	1663.86	1270.77	915.292	1336.67	1255.58	1034.72	797.433	911.333	691.511	1438.2	1350.27	811.614	664.41	873.96	963.329	938.111	940.63	924.58	1105.08	1000.9	871.628	1203.69	2097.42	1085.89	1176.14	1187.7	607.562	1090.29	722.282	820.379	866.393	792.004	900.111	2034.03	622.484	676.123	656.907	818.715
K00880	lyxK; L-xylulokinase	720.967	752.083	719.099	683.971	636.462	618.405	518.292	860.309	941.419	678.131	879.49	1397.59	794.9	597.926	753.079	893.165	1563.3	647.164	716.729	662.382	874.284	792.234	692.415	600.504	601.76	892.755	1037.96	878.05	1035.81	819.43	1344.34	576.49	1156.95	616.906	760.653	790.261	785.333	663.328	642.471	832.769	927.677	596.179	657.263	790.436	567.194
K00881	alsK; allose kinase	212.221	235.35	168.315	179.008	137.368	140.025	133.053	243.816	187.216	180.886	235.655	421.234	273.584	152.004	162.219	174.261	381.902	161.799	162.099	177.396	182.687	283.542	183.469	119.114	192.505	389.916	273.324	230.868	366.813	351.152	268.031	158.439	269.006	120.133	259.326	204.01	225.648	237.305	202.44	264.442	352.06	168.833	207.151	202.617	186.338
K00882	fruK; 1-phosphofructokinase	8688.78	8702.68	8383.48	7724.16	8578.47	8025.45	7640.73	9926.23	13250.8	7392.06	9482.54	12865.3	9527.28	8204.93	9598.82	10373.1	15007.8	7302.87	8717.11	8169.66	10424.3	8405	9557.17	8229.05	7491.53	9088.97	11246.2	8788.07	12944.7	9721.43	12871.1	9635.38	10641.6	9029.84	9986.85	8183.04	8858.95	8808.58	7132.59	9784.97	8236.47	6992	8280.67	8927.4	9184.84
K00883	dgoK; 2-dehydro-3-deoxygalactonokinase	359.442	366.042	430.883	318.797	321.305	345.636	334.92	258.061	466.371	328.061	359.083	745.541	355.919	310.519	405.365	371.487	1056.65	292.269	360.198	237.306	465.66	297.185	494.666	281.233	304.126	457.871	502.835	413.669	521.574	331.229	573.797	278.566	432.438	259.172	347.637	410.793	245.54	324.194	257.824	373.154	298.759	241.926	326.886	348.296	236.056
K00884	NAGK; N-acetylglucosamine kinase	4.67373	1.49692	0.161457	0.610502	0.955806	0.947738	0.923588	1.33241	1.44396	2.41914	1.62177	11.4113	1.18473	0.793414	2.03593	4.22676	1.64093	5.54031	6.03028	2.4147	0.899852	6.58463	2.59658	0.808431	3.33604	1.30676	3.99286	0.82122	2.41043	7.37674	3.32633	0.261023	0.766655	2.04713	65.66	0.844027	2.84169	1.45824	1.97327	1.05392	15.8258	5.63869	1.1801	0.582564	24.6721
K00885	nanK; N-acylmannosamine kinase	3.98059	1.0915	0.0797389	0.0464434	0.0371099	0.0309885	0.0999456	0.312957	0.560432	0.0319568	0.149151	0.259965	0.275228	0.0467669	1.35905	0.141076	0.777836	0.0751744	5.52429	0.392572	0.402995	0.645664	0.0229237	0.00451539	0.71548	0.0619938	0.198587	0.0245089	0.792892	0.0557977	0.0683425	0.525249	0.0944031	1.6084	60.3598	0.0704241	0.157693	0.0174146	0.060151	0.0348337	0.267491	0.0513291	0.0103202	0.0339048	23.3974
K00886	ppgK; polyphosphate glucokinase	271.211	227.313	204.306	278.625	160.487	143.393	216.213	199.71	330.996	202.749	241.879	266.191	280.569	214.537	229.633	225.136	402.837	232.305	166.179	175.168	270.286	363.396	323.672	165.129	261.093	181.792	171.896	189.858	353.353	178.625	218.184	262.806	123.388	193.556	313.573	170.67	194.697	260.142	147.074	275.019	400.788	202.643	278.813	343.883	218.878
K00887	dgkA; undecaprenol kinase	1339.84	1249.76	1144.1	1112.36	1240.39	1457.94	1020.9	1288.61	2478.35	1093.07	1286.41	2171.48	1190.22	1571.36	1614.88	1327.76	2420.78	871.084	1125.25	1625.38	1878.47	1217.91	1355.72	838.07	1100.71	1433	1665.83	1215.06	3095.97	1649.4	2071.01	1241.19	1792.35	1385.35	1317.96	1503.43	1418.39	1188.23	1018.14	1607.17	1397.84	989.586	1026.69	1391.62	1912.83
K00889	PIP5K; 1-phosphatidylinositol-4-phosphate 5-kinase	0.0631065	0.0227917	1.24905	9.12227e-05	0.466984	0.580335	8.29802e-05	0.0199107	1.97272	0.539801	0.54356	0.0135477	1.00148	9.18582e-05	2.0494	0.469506	0.00679069	0.0825249	0.0101524	0.0143714	0.541507	2.69972	1.16481	1.69592	0.90047	0.0199877	6.71485e-05	4.81396e-05	0.547574	0.0138563	1.14488	0.928716	0.714305	2.40743e-05	0.892536	0.0227702	0.287367	0.629044	0.362314	0.981718	2.1168	2.51925	0.00351099	1.90088e-05	8.10919e-05
K00891	aroK; shikimate kinase	20417.4	22520	17005.1	18655.8	16050.7	16685.2	16181.1	20619.7	25358.2	16883.2	20809.8	20657.2	21077.5	18702.2	21076.8	21247.9	22539.9	16670.9	18935.8	15623.3	18219.1	18631.5	18910.1	17978.2	17573.2	18287.4	19632	20238.9	20952.6	21771.2	20311.2	21669.4	17551.9	16026.1	19041.2	15058.5	18462	18709.8	12842.8	17536.9	16994.5	16289.3	20697.9	18160.1	19664.6
K00892	gsk; inosine kinase	3.70354	1.07957	0.018378	0.220385	0.0688634	0.0933602	0.200472	0.241811	0.149986	0.0826361	0.575447	0.596874	0.0474585	0.22192	0.0688634	0.131608	0.177531	0.0795659	5.55663	0.114787	0.0244968	0.0244968	0.0550907	0.0214266	0.200493	0.15764	0.162224	0.1163	0.310675	0.264773	0.0505071	0.0520422	0.108668	0.808161	60.4199	0.0275454	0.133143	0.0826361	0.0673499	0.165294	0.99479	0.145402	0.048972	0.0459234	0.195909
K00893	DCK; deoxycitidine/deoxyadenosine/deoxyguanosine kinase	0.00484479	0.00189386	0.000437441	0.00524569	0.00163912	0.0022222	0.00477171	0.0057557	0.00357004	0.00196694	0.0136971	0.0142071	0.00112963	0.00528223	0.00163912	0.00313259	0.00422568	0.00189386	0.00134783	0.00273221	0.000583083	0.000583083	0.00131129	0.000510005	0.00477223	0.00375222	0.00386132	0.00276823	0.00739482	0.00630224	0.00120219	0.00123873	0.00258656	0.00138437	0.00404402	0.000655647	0.00316913	0.00196694	0.00160309	0.0039344	0.0236784	0.00346093	0.00116565	0.00109309	0.00466312
K00895	pfp; diphosphate-dependent phosphofructokinase	8542.93	8813.93	5543.85	7675.87	5944.45	5479.06	7143.57	7309.53	9399.12	7241.41	7860.36	3563.46	8404.48	7590.34	7955.76	8022.26	4742.76	5382.28	7589.74	5373.45	6487.28	6468.09	6960.06	6747.66	7284.98	6285.68	5378.89	8015.26	6845.13	6941.93	4885.39	8430.97	4745.91	5980.71	5333.76	4200.9	5987.23	7244.61	4124.18	5834.18	4956.43	6674.38	8077.22	7113.45	8679.02
K00897	Unclassified	667.537	269.316	246.95	192.74	258.931	428.556	265.806	297.997	353.318	179.922	222.646	543.763	243.384	244.953	212.021	367.624	833.592	231.816	167.184	206.331	378.72	220.899	353.129	157.7	294.475	238.05	526.397	340.73	490.132	192.154	325.594	374.043	361.223	824.109	463.228	300.122	257.146	331.108	262.775	539.634	370.514	245.528	417.996	406.626	138.198
K00899	mtnK; 5-methylthioribose kinase	1304.09	1487.67	1476.6	1160.44	1102.03	1118.77	1013.28	1211.71	1475.87	1179.39	1301.75	2545.31	1292.8	1359.36	1290.4	1639.23	2343.52	1673.66	1267.07	1166.63	1502.8	1349.49	1457.55	985.829	1246.07	1803.08	1963.61	1563.43	1907.19	2064.45	2007.5	1264.76	1816.76	1098.06	1473.93	1423.79	1755.43	1197.17	1076.31	1510.02	1729.69	1077.71	1237.81	1465.35	1071.67
K00900	E2.7.1.105; 6-phosphofructo-2-kinase	0.000246446	9.63374e-05	2.22519e-05	0.000266839	8.3379e-05	0.000113039	0.000242728	0.000292782	0.000181601	0.000100055	0.000696745	0.000722688	5.74621e-05	0.000268698	8.3379e-05	0.000159349	0.000214953	9.63374e-05	6.85619e-05	0.000138982	2.96604e-05	2.96604e-05	6.67032e-05	2.5943e-05	0.000242755	0.000190869	0.000196418	0.000140815	0.000376161	0.100082	6.11533e-05	6.3012e-05	0.000131574	7.04206e-05	0.000205712	3.33516e-05	0.000161208	0.000100055	8.15465e-05	0.000200136	0.0502721	0.000176051	5.92946e-05	5.56035e-05	0.000237205
K00901	dgkA; diacylglycerol kinase (ATP)	11313.3	11676.7	8458.67	10234.3	8630.56	7995.09	8831.21	10496.4	13975	9315.46	10860.5	8085.87	12313.5	9593.98	10685.9	11322.9	10586.7	8145.34	9680.23	8127.78	9603.39	9393.64	10063.3	10352.1	9167.31	9177.36	8866.97	11067.4	9794.92	10068.8	9440.41	11452.5	7991.35	8516.87	9179.55	7038.42	9189.16	9747.1	6142.03	8765.39	7955.65	8468.4	11295.6	9267.31	11348.6
K00903	Unclassified	0.064887	0.0752126	0.051656	0.0243201	0.0344188	0.043366	0.053901	0.0418868	0.0481493	0.0551985	0.0741456	0.260035	0.0613899	0.0496584	0.0703881	0.0685546	0.170129	0.0346729	0.0379232	0.0752706	0.104925	0.0281238	0.0577219	0.0292185	0.0444646	0.0782121	0.120155	0.0476271	0.198759	0.0521352	0.140682	0.0333453	0.0776521	0.0349605	0.0824845	0.0785736	0.103955	0.0366248	0.0652428	0.105837	0.143229	0.0359221	0.0325833	0.0686484	0.0534581
K00906	Unclassified	6.04412	1.99614	0.214985	2.57805	0.899679	1.41867	2.5082	3.15524	2.24299	1.69173	6.73157	7.63104	0.946726	2.59601	1.01232	2.20044	2.27254	1.05999	6.23727	1.90731	0.604721	3.12184	1.23932	0.544498	2.74557	2.18005	1.89769	1.45855	3.91509	4.04004	1.55673	0.608788	1.4468	1.56076	63.2294	0.648766	2.79547	1.34173	1.39012	2.12938	14.604	2.97496	0.906407	0.700299	2.68213
K00912	lpxK; tetraacyldisaccharide 4'-kinase	9488.8	9922.14	6382.71	8211.95	6745.48	6063.71	7922.75	7979.72	10415.1	8086.76	8576.98	3672.95	9180.06	8422.96	8656.7	8471.93	5310.72	6902.68	8221.78	5814.39	7166.74	7867.58	8026.04	7304.65	8226.55	7040.64	5797.69	8628.23	7334.97	8696.01	5311.89	9060.53	4941.47	6963.64	6055.16	4805.49	7000.79	7926.48	4476.98	6593.77	6729.76	7582.37	9125.72	7612.68	9654.05
K00914	PIK3C3; phosphatidylinositol 3-kinase	1.3468e-07	5.26473e-08	1.21604e-08	1.45825e-07	4.55657e-08	6.17748e-08	1.32648e-07	1.60002e-07	9.92431e-08	5.46788e-08	3.80763e-07	3.94941e-07	3.14024e-08	1.4684e-07	4.55657e-08	8.70827e-08	1.17469e-07	5.26473e-08	3.74683e-08	7.59524e-08	1.62091e-08	1.62091e-08	3.64526e-08	1.41776e-08	1.32663e-07	1.04308e-07	1.07341e-07	7.69538e-08	2.05568e-07	1.75195e-07	3.34196e-08	3.44354e-08	7.19037e-08	3.84841e-08	1.12419e-07	1.82263e-08	8.80985e-08	5.46788e-08	4.45643e-08	1.09372e-07	6.58235e-07	9.62102e-08	3.24039e-08	3.03867e-08	1.2963e-07	bile acid:Na+ symporter, BASS family
K00916	Unclassified	1.34707e-07	5.26578e-08	1.21628e-08	1.45853e-07	4.55747e-08	6.1787e-08	1.32675e-07	1.60034e-07	9.92627e-08	5.46897e-08	3.80839e-07	3.95019e-07	3.14086e-08	1.46869e-07	4.55747e-08	8.70999e-08	1.17493e-07	5.26578e-08	3.74757e-08	7.59674e-08	1.62123e-08	1.62123e-08	3.64598e-08	1.41804e-08	1.32689e-07	1.04328e-07	1.07362e-07	7.6969e-08	2.05609e-07	1.7523e-07	3.34262e-08	3.44422e-08	7.19179e-08	3.84917e-08	1.12441e-07	1.82299e-08	8.81159e-08	5.46897e-08	4.45731e-08	1.09394e-07	6.58365e-07	9.62292e-08	3.24103e-08	3.03927e-08	1.29655e-07
K00917	lacC; tagatose 6-phosphate kinase	1210.3	879.55	1060.81	805.016	961.198	1090.52	831.939	1530.89	1677.03	1034.42	1112.2	1648.39	1101.98	1040.32	1092.24	1115.67	2037.52	834.115	954.829	989.883	1319.21	1140.67	1299.66	859.685	1120.91	1270.92	1339.97	1100.03	1944.18	1343.73	1341.76	1542.86	1260.65	774.149	1359.83	1040.06	1214.35	1199.62	959.918	1186.69	1395.87	926.45	739.287	1019.2	995.715
K00918	pfkC; ADP-dependent phosphofructokinase/glucokinase	179.75	53.6095	83.3729	118.267	77.4471	66.5806	34.213	199.803	207.248	108.576	148.851	157.051	52.2788	127.844	151.074	59.2801	149.579	81.9317	37.0558	59.2791	90.4881	87.2953	146.111	74.301	91.7171	85.1485	50.6457	87.2472	136.855	195.466	125.333	20.7013	188.627	60.2089	122.827	75.677	58.3715	38.468	28.8801	67.4574	128.621	84.7482	31.0375	29.4193	104.798
K00919	ispE; 4-diphosphocytidyl-2-C-methyl-D-erythritol kinase	18714.3	21254	16032.3	17903.3	16280.3	14959.1	16557.5	20151	24807.7	16699.8	20171	19921.6	20190.8	17909.6	19801.4	21189.6	22646.6	16330.6	18250.8	15699.2	19205.9	17366.2	18866.9	16913.3	16784.8	17398.9	18807.7	19468.2	21551	20184.8	20613.3	20043.5	17699.8	15934.6	17398.5	15229.2	18137.9	17360.9	12417.1	17638.2	16735	15846.8	18970.6	17836	19744.8
K00921	PIKFYVE; 1-phosphatidylinositol-3-phosphate 5-kinase	1.97015e-07	7.70145e-08	1.77887e-08	2.13318e-07	6.66552e-08	9.03664e-08	1.94043e-07	2.34057e-07	1.45176e-07	7.99862e-08	5.56995e-07	5.77734e-07	4.59366e-08	2.14803e-07	6.66552e-08	1.27388e-07	1.71839e-07	7.70145e-08	5.481e-08	1.11106e-07	2.37112e-08	2.37112e-08	5.33242e-08	2.07395e-08	1.94064e-07	1.52585e-07	1.57022e-07	1.12571e-07	3.00712e-07	2.56282e-07	4.88874e-08	5.03733e-08	1.05183e-07	5.62959e-08	1.64451e-07	2.66621e-08	1.28874e-07	7.99862e-08	6.51902e-08	1.59993e-07	9.6289e-07	1.4074e-07	4.74016e-08	4.44507e-08	1.89627e-07
K00923	PIK3C2; phosphatidylinositol-4-phosphate 3-kinase	0.000105321	8.59693e-06	5.80877e-05	4.96235e-05	5.88751e-05	6.77862e-05	3.31031e-06	6.66316e-05	9.46805e-05	5.25667e-05	4.67458e-05	0.000770146	5.44225e-05	3.91033e-05	8.5649e-05	0.000114819	0.000211549	0.000172187	5.41227e-05	0.000110067	0.000130474	6.61647e-05	5.1245e-05	4.36025e-05	0.000100569	5.29338e-05	0.000135326	5.41227e-05	0.00021629	5.11122e-05	0.000261948	3.00719e-05	0.000124552	9.08029e-05	0.000102845	0.000155612	1.58599e-05	8.11841e-05	6.84408e-05	0.000175932	5.2634e-05	4.21138e-05	8.34062e-26	0.000131728	5.77205e-05
K00924	Unclassified	724.018	713.28	655.909	690.038	726.448	567.705	764.58	933.211	1188.73	791.498	1027.51	1272.15	1002.23	733.63	896.323	886.303	1663.55	880.013	765.976	784.351	958.824	776.398	836.332	712.719	628.381	1000.45	1121.69	792.616	1359.64	1282.54	1081.79	640.333	1191.75	715.904	774.7	1019.36	867.186	661.679	717.068	1237.44	1223.31	838.725	658.173	888.429	1008.64
K00925	ackA; acetate kinase	22157.7	22733.7	17240.8	18614.3	17893.4	18393.8	17601.2	21681.7	28863.4	17931.3	21478.3	24592.7	21519.5	19819.9	21702	23873.7	28260.6	16703.1	19770.9	18129.5	22994.3	19143.5	20828.1	17461.8	18466.2	20082.8	22872.5	21145.7	27848.8	21347	23714.1	21695.8	21701.2	22330.8	19673.2	17710.2	20421.9	19714.8	15842.8	22712.8	18319.4	17169.2	21096.8	20833.6	21402.8
K00926	arcC; carbamate kinase	5984.74	5281.42	4889.32	4370.22	4158.3	5694.27	4062.31	5612.25	7145.03	4216.52	5554.67	8974.12	5665.93	4779.12	5376.38	5972.17	9508.26	5423.08	5064.6	4807.84	5727.43	5692.89	5116.26	3689.31	4775.29	6246.5	7437.8	5731.68	7736.87	6963.6	6920.58	5370.58	6563.16	5629.16	5815.18	5352.31	6109.08	5201.87	4672.16	6738.15	6194.71	4448.47	5006.06	5502.52	4812.42
K00927	PGK; phosphoglycerate kinase	18385.3	19188.7	14834.5	16475.5	14902.2	14648.2	15064.1	18255.2	23318.1	15517	18997.9	19931.2	19074.8	16874.3	18158.9	19614.3	22180.7	15070.7	16679.9	14975.5	17936.4	16818.7	17610	15385.4	15958.6	17083.8	18747.4	18467.9	21543.8	19593.8	19421.2	18558.7	17219.1	15950.1	17113.7	14261.2	17659.4	16440.4	12642.2	17759.8	17121	14834.1	18100.5	17192.8	18201.7
K00928	lysC; aspartate kinase	28356.7	29999.3	22323.7	24380.4	22627.9	21459.7	22708.4	26589.6	34355.6	23168.2	28001.8	29210.6	29181.9	25277.4	26972.5	29101.1	35581.6	21505.9	23815	21925.5	26899.8	24480.4	27383.7	21869.7	24463.3	23885	26599.2	27217.7	31703.1	26282.3	28739.2	27378.5	24643.1	23633.3	24338.4	21459.1	24896.1	23872.3	17620.5	25661.5	21759.1	21752.5	26491.6	25110.3	27361.7
K00929	buk; butyrate kinase	11092.6	11401.4	8016.96	9344.86	8110.54	7131.24	8325.25	9492.85	11821.6	8838.68	10185.7	7944.06	10100.3	9563.47	9612.66	10570.8	9896.79	7615.77	9285.8	7468.79	9135.05	9166	8691.17	8138.56	9149.54	8980.43	8472.36	10380.1	9804.68	9689.33	8614.44	10329.4	7533.54	7845.41	7716.54	6922.93	8941.87	8531.43	5414.63	8476.52	7798.45	8504.18	10227.7	9177.59	10461.5
K00930	argB; acetylglutamate kinase	15580.4	18397.7	13597.4	14945.9	13550.2	12690	13380	16737.9	19866.1	13675.5	16346.2	16239.5	16707	15054.3	16560.5	17536.9	18262.6	14006.3	15395.9	12584	15582.6	14800.7	15190.5	14435.4	14070.6	14296.4	15590.7	16419.5	17100.2	17385.4	16845.7	17381.4	14486.7	13271.4	14577.6	12382.9	14974.5	14668.2	10228.9	14092.9	14544.3	13296.5	16377.5	14749.7	16002.7
K00931	proB; glutamate 5-kinase	16152.7	18332.6	14048.1	15239	14406	12923.3	14126.7	17573.9	21539.4	14256.4	17171.8	17510.1	17402.7	15536.4	17095	18355.9	19849.6	14558.6	15858	13463	16771.3	14920.9	16287.1	15164.6	14472.5	15287.6	16416.1	17031.7	18612.7	17790.9	18142.1	17590.3	15568.3	14283	15111.2	13216.6	15604.8	15258.2	10936.2	15048.6	15036.4	13755.2	16494.1	15198.1	17045.2
K00932	tdcD; propionate kinase	3.5	1	1.38667e-08	1.66286e-07	5.19593e-08	7.04428e-08	1.51261e-07	1.82453e-07	1.13169e-07	6.23512e-08	4.34191e-07	4.50358e-07	3.58087e-08	1.67444e-07	5.19593e-08	9.93018e-08	1.33952e-07	6.00346e-08	5.5	8.66097e-08	1.84835e-08	1.84835e-08	4.15675e-08	1.61669e-08	1.51277e-07	1.18944e-07	1.22402e-07	8.77517e-08	2.34412e-07	1.99778e-07	3.81089e-08	3.92672e-08	8.19929e-08	0.75	60.25	2.07837e-08	1.0046e-07	6.23512e-08	5.08174e-08	1.24719e-07	7.50596e-07	1.0971e-07	3.69507e-08	3.46504e-08	1.47819e-07
K00933	E2.7.3.2; creatine kinase	0.0089762	0.00350886	0.000810471	0.00971898	0.00303688	0.00411719	0.00884081	0.0106639	0.0066144	0.00364426	0.0253773	0.0263222	0.00209292	0.00978667	0.00303688	0.00580392	0.00782915	0.00350886	0.0024972	0.00506211	0.00108031	0.00108031	0.00242951	0.000944914	0.00884176	0.00695193	0.00715407	0.00512885	0.0137008	0.0116765	0.00222736	0.00229506	0.00479227	0.0025649	0.00749256	0.00121475	0.00587162	0.00364426	0.00297014	0.00728947	0.0438703	0.00641225	0.00215967	0.00202522	0.00863962
K00934	E2.7.3.3; arginine kinase	0.00890179	0.00347977	0.000803752	0.00963841	0.00301171	0.00408306	0.00876752	0.0105755	0.00655956	0.00361405	0.0251669	0.026104	0.00207557	0.00970554	0.00301171	0.00575581	0.00776425	0.00347977	0.0024765	0.00502014	0.00107135	0.00107135	0.00240937	0.00093708	0.00876846	0.0068943	0.00709477	0.00508633	0.0135872	0.0115797	0.0022089	0.00227604	0.00475254	0.00254364	0.00743045	0.00120468	0.00582295	0.00361405	0.00294552	0.00722904	0.0435066	0.0063591	0.00214176	0.00200843	0.008568
K00936	Unclassified	20707.5	23311.5	17146.9	18785.9	16864.7	17851.6	14904.5	19216.5	26275.2	16060.1	21499.7	20017.8	22884.7	19185.7	21193.5	21729.3	23304	16334.5	17608.4	16740	18680	19735.2	19760.8	20901.1	17374	17420.7	20592.7	20423.4	21152.4	22324	22287.3	24000.1	17360	16522	20229.5	14996.4	18136.9	19374.3	13280	18244.6	16799.2	16494.9	22719.1	17507.1	20212.6
K00937	ppk1; polyphosphate kinase	19122.4	20869.2	15551.4	17247.9	15731.7	15151.7	15786.3	19386.8	24081.4	15879.6	18320.1	17539.5	20310.5	16846	18642.9	20189.2	21218.9	15339.1	17451.1	14686.6	18219.2	17027.3	18156.2	16988.6	16202.7	16319.3	17485.3	19002.6	18440.6	18568.4	19235.9	20164	16227.6	16474.8	16253.4	13327.4	16526.3	17311	11957.4	16807.8	15078.4	15157	19042.7	17237.7	19098.8
K00938	E2.7.4.2; phosphomevalonate kinase	1146.7	560.888	347.275	319.087	663.045	1359.96	420.77	680.021	1785.38	473.291	485.432	1230.44	611.614	807.135	839.284	738.09	1919.58	172.909	573.985	1078.71	1496.14	482.969	909.399	266.938	515.9	699.475	1243.51	544.684	2413.6	692.962	888.398	830.514	1200.24	2067.12	459.026	1103.28	529.876	1009.82	1025.92	1676.36	647.112	462.253	595.676	992.381	1112.47
K00939	adk; adenylate kinase	19722.5	21650.3	16610.6	17750.6	16690.7	15823.2	16572.7	20313.4	25566.8	16724.9	20134.1	20476.6	20037.4	18411.5	19860.7	21440.4	22950.9	16571.9	18433.1	15879.9	19921.5	18214	19154.6	16795.9	16945.5	18061.5	19721.3	19599.7	21986.8	20702.5	21199.5	20410.4	18442.8	17426.6	17945.3	15097.2	18622	17934.6	13171.2	18655.1	17759.9	16192.4	19635.2	18610	19528.1		K(+)-stimulated pyrophosphate-energized sodium pump
K00940	ndk; nucleoside-diphosphate kinase	6896.11	8126.24	5504.03	6147.44	6150.64	6118.4	6647.35	7674.08	9249.6	5997.74	6400.18	5098.45	6019.94	6754.53	7658.69	7147.96	4881.16	6649.82	7889.53	5067.02	6732.49	6649.75	6077.36	6687.52	5795.85	6685.89	5974.71	6836.17	6832.09	7695.43	5680.53	7991.97	4748.6	7066.01	5253.17	4517.4	5822.15	7185.21	4123.67	5898.91	7502.33	6149.58	7571.43	6762.58	7206.89
K00941	thiD; hydroxymethylpyrimidine/phosphomethylpyrimidine kinase	14464.5	15811.7	11921	12998.2	12635.9	12609.1	12846.1	15198	19207.7	12355.2	13814.4	13539.1	14083.6	13639	15013.8	15556.7	15656.3	12806.8	14636.5	11151.4	14944.4	13058.2	14192.7	12842.6	12860.7	13143.9	13871.7	14676.1	15444.2	14715.9	14587.3	15095.6	12717.1	14237.3	12014.5	10592.6	12603.2	14052.8	9581.44	13245.8	12743.2	12027.2	14562.1	13872.3	14713.2
K00942	gmk; guanylate kinase	21249.9	22010	17398.5	18702.9	17671.2	17665.5	17692.7	21690.2	28411.6	17788.1	21254.4	22109.9	21603.1	19103.5	21389.6	22759.2	25642.3	17273.9	19679.6	17345.1	21814.6	19125.7	20773.9	17963.2	18060.3	19195.1	21281.7	20913.7	24289.1	21340.4	22357.6	21655.2	19759.1	19866.2	18977.1	16608.3	19501.5	19493.6	14597.2	21093.5	17993.7	17217.3	20850.6	19952	20938
K00943	tmk; dTMP kinase	8110.17	9037.74	8107.32	6898.11	8147.27	7222.64	7151.87	9539.38	12371.8	7195.91	8735.45	12313.2	7443.59	7838.67	8614.57	9846.48	13856.6	8729.63	7786.61	7675.08	10350.3	8392.7	9069.42	6539.73	7200.7	9145.67	10067	8363.39	12354.6	10419.9	11558.3	7839.37	10434.4	8603.69	8832.43	8159.01	9575.48	7489.18	6692.76	9592.01	10588.8	7296.11	7609.55	8324.8	8060.17
K00945	cmk; CMP/dCMP kinase	26602.7	28481.1	23388.1	25151.4	23269.5	22467.6	22650.5	28314.8	35825.6	22847.6	28845.3	30754	29199.4	24742.3	28305.8	30495.5	34721.7	23026.5	26059.4	22860.9	27255.9	24898.7	27085.8	25778.4	22991.7	24974.2	29115.2	27760.8	30087.5	28670.9	32044.2	28369	26609.2	24022.4	26431.3	22191.6	25760.4	25450.1	18770.2	26384.9	23020.8	22007	27673.3	25398.1	26801.2
K00946	thiL; thiamine-monophosphate kinase	10159.8	10411.1	6720.6	8536.97	6902.66	6427.53	8156.56	8476.29	10762.6	8226.97	9034.98	4255.11	9437.51	8723.86	9116.36	8882.71	5542.05	7235.58	8732.13	6193.43	7344.61	8289.69	7927.33	7378.98	8334.34	7543.89	6160.04	9111.12	7738.15	9176.99	5651.43	9442.03	5218.27	7301.17	6574.22	4973.85	7543.1	8195.6	4855.83	7062.74	7228.19	8071.41	9732.03	8093.95	10042.3
K00947	Unclassified	0.214573	0.0680527	0.0159698	0.185474	5.54246	0.0791588	0.169135	0.229938	0.179341	4.29902	2.06948	0.503498	10.7638	4.94994	0.104733	0.112354	1.28279	0.0676327	0.0476558	3.4237	0.052382	0.0520466	0.0469516	2.7637	6.20456	5.95578	0.138623	6.06914	0.293814	13.0571	0.0429263	0.0961568	0.0923771	0.0497862	0.143824	0.0246081	0.114064	0.0695458	0.0573519	0.13911	11.2595	0.122369	2.16026	2.68403	0.165714
K00948	PRPS; ribose-phosphate pyrophosphokinase	24320.4	25480.7	20144	21499	20043.3	20754.3	19823.8	24439	31789.8	19767.3	24557.1	27554.1	24880.7	22343.1	24795.4	25840.2	31061.2	19832.2	22267.2	19859.1	24388.9	22045	23690.8	20906.5	20446.8	22029.8	25519	23893.6	28903.1	25066.5	26753.2	25411.4	23004.2	22275.6	22510.4	19292	22033	22574.6	16721.6	24018.3	21061.8	19468.1	24151	22901.1	23721.5
K00949	thiN; thiamine pyrophosphokinase	15388.1	17034.9	13651.1	14310.3	13819.5	13126	13218.1	16711.4	20946.4	13170.7	16114.7	18413.3	16057.9	14607	16289.7	17623.9	20803.6	12786.3	14996	13247.9	16447.9	14575.1	15805	13792.8	13558.9	14650.8	16981.9	15842.7	18511.5	15947.5	18242.3	16548	15866.9	14286.6	15071.5	12994.9	15161.6	14620.3	10762.8	15611.1	13541.7	12383.1	15480.5	15147.6	15197.7
K00950	folK; 2-amino-4-hydroxy-6-hydroxymethyldihydropteridine diphosphokinase	17888.1	19701.9	12660.9	15797	13181.1	11707.7	14868	16247.4	20437.7	15188.6	16405	8602.19	17155.8	15888.4	17075.5	17095.7	11459.9	12727.1	16052.9	11680.4	14410.9	14428.5	14923.8	13988	15060	13403.2	11528.5	16642.9	14403.4	15625.7	11527.6	17483	10836.1	13157.6	11408.9	9409.67	13444.2	15076.1	8879.82	12569.4	11881.1	14296.1	17232.4	14766.1	18475.9
K00951	relA; GTP pyrophosphokinase	29265.9	31279.8	22856.6	26143.8	23436.1	22188.1	24729.2	28705.7	36381.8	24968	28987.8	25098.9	29583.1	26850.9	28940.6	30264.6	29023	22381.2	27202.2	22045.5	27194.8	25608.1	27319.1	24429.7	25277.1	25207.5	25910.4	28721.4	30393.1	27429.3	26386.8	29921.3	23792.8	24784	24047	20368.2	25533.1	26212.4	17918.8	25605.8	22019.7	23415.1	28616.5	26198.2	29243.3
K00952	nadM; nicotinamide-nucleotide adenylyltransferase	263.304	296.657	195.133	198.483	247.27	338.004	150.842	290.416	287.935	220.217	240.875	315.137	320.954	208.409	253.38	300.076	282.521	173.154	241.183	238.085	195.786	235.38	313.953	180.799	212.826	180.254	232.505	281.195	193.563	279.094	317.535	250.379	219.424	177.205	235.538	173.338	154.248	244.404	161.441	164.44	150.598	172.228	197.988	228.852	158.767
K00953	FLAD1; FAD synthetase	0.121811	0.047617	0.0109985	0.131891	0.041212	0.0558723	0.119974	0.144714	0.0897606	0.0494544	0.344382	0.357205	0.028402	0.13281	0.041212	0.0787621	0.106245	0.047617	0.0338883	0.0686953	0.0146603	0.0146603	0.0329696	0.0128229	0.119987	0.0943411	0.0970843	0.069601	0.185926	0.158456	0.0302264	0.0311451	0.0650334	0.034807	0.101678	0.0164848	0.0796808	0.0494544	0.0403062	0.0989217	0.595342	0.0870174	0.0293077	0.0274833	0.117244
K00954	E2.7.7.3A; pantetheine-phosphate adenylyltransferase	19047.1	20659	15897.3	17288	15915.8	15390.5	16187.3	19359.8	24899.9	16230.8	19425.2	19748.8	19557.6	17756.9	19503.5	20806.6	22470.3	16215.9	18047.9	15389.1	19102.1	17536.5	18712.9	16511.9	16502.6	17559.7	19015.7	19136.1	21478.1	19986.9	20074.8	19788.7	17498.1	16920.1	17220.7	14780.4	17800.1	17539.4	12772.4	18201.2	17007.8	15714	19027.1	18017.6	19119
K00955	cysNC; bifunctional enzyme CysN/CysC	866.553	216.266	651.848	365.306	214.103	370.002	177.286	433.693	874.953	456.444	595.738	488.692	299.504	458.077	540.634	292.881	408.745	672.873	393.414	353.413	271.592	763.041	336.248	233.527	508.891	615.869	375.963	547.841	577.899	1163.12	291.565	184.936	395.321	304.117	534.473	201.318	624.932	370.364	362.006	390.22	1157.4	668.045	590.364	371.828	434.167
K00956	cysN; sulfate adenylyltransferase subunit 1	7441.99	7630.96	4669.71	6513.05	5292.49	4566.18	5928.46	6126.73	7960.89	6063.88	6412.93	3119.24	7298.36	6553.34	6748.28	6843.89	4553.01	4530.87	6432.27	4623.1	5616.8	5761.14	5931.16	5977.4	6139.68	5260.61	4491.02	6904.37	5493.28	5708.06	4254.34	7023.4	3940.1	5126.92	4342.21	3753.78	4875.58	5981.56	3081.6	4905.57	4251.18	5529.53	6970.86	5774.1	7682.29
K00957	cysD; sulfate adenylyltransferase subunit 2	8391.74	7910.33	5336.83	6943.27	5647.41	4995.61	6199.1	6634.84	8926.4	6609.35	7083.92	3544.39	7627.91	7117.83	7438.21	7208.43	4968.78	5308.06	6912.83	5019.6	5958.41	6626.59	6365.63	6318.14	6802.12	5971.19	4859.77	7529.99	6108.03	6868.23	4587.91	7300.82	4404.67	5545.11	4906.28	3977.88	5517.46	6464.51	3483.74	5380.05	5315.91	6244.55	7602.35	6221	8153.13
K00958	sat; sulfate adenylyltransferase	193.125	241.222	126.165	221.326	88.2751	176.878	233.543	205.854	170.658	118.436	271.679	455.121	155.454	242.287	203.873	169.619	241.891	175.928	109.161	157.262	133.472	188.67	141.275	124.978	186.149	242.399	231.713	171.841	313.434	260.552	183.632	158.78	104.65	134.125	194.074	133.001	263.248	173.069	127.512	181.355	562.584	225.719	209.874	161.454	206.4
K00960	rpo13; DNA-directed RNA polymerase subunit 13	0.444516	0.404123	0.261035	0.27196	0.214058	0.270725	0.384984	0.369955	0.343014	0.308033	0.751476	1.61582	0.31999	0.381163	0.374236	0.408658	0.901914	0.212516	0.211143	0.438308	0.502781	0.158065	0.306301	0.146633	0.346635	0.467314	0.659765	0.304468	1.12197	0.425626	0.670595	0.20851	0.426488	0.198584	0.500387	0.372928	0.562177	0.233133	0.342362	0.59351	1.36256	0.26971	0.18907	0.346578	0.379748
K00962	pnp; polyribonucleotide nucleotidyltransferase	19030	20834.5	16556.3	17777.2	16086.2	14919.6	16434.1	19803.5	24443.2	16557.6	19961	19453.7	19660.7	17941.8	19831.4	21004.1	21752.3	16558.9	18398.1	15137.6	18610.6	18065.3	18583.1	16873.8	16888.7	17936.1	18791.5	19419.8	20358.6	20392	20439.8	19872.4	17474	15596.3	17865.6	14578.5	18499.5	17472.4	12467.8	17549.7	17031.6	16156.2	19359.7	17957.1	18971.6
K00963	UGP2; UTP--glucose-1-phosphate uridylyltransferase	6124.53	6971.68	5772.62	4854.71	5738.82	6683.37	5443.04	7327.1	10079.7	5221.03	5890.19	9978.67	5475.97	5793.46	6688.2	7404.31	11771.5	6184.52	5924.66	5999.87	8752.03	5707.81	7330.8	4598.11	5185.4	6955.9	8083.5	5809.8	11256.1	7548.6	8869.72	6425.37	8337.52	8133.18	6140.02	6401.41	6817.31	6227.33	5724.37	8250.82	7767.31	4871.26	5390.91	6797.82	6245.26
K00965	galT; UDPglucose--hexose-1-phosphate uridylyltransferase	8405.81	8090.54	7839.96	7506.57	7783.5	7919.67	6862.75	9120.52	12374.6	6752.12	9095.9	13433.1	9248.41	7423.33	9039.47	9697.55	15482.7	7320.32	8046.83	8069.81	9926.61	8108.83	9327.95	8186	7239.24	8618.1	11336	8997.04	12241.2	9280.61	12152.6	9182.38	10063.5	8795.82	9619.37	8578.15	8616.58	8322.79	6846.67	10013.3	8220.53	6833.48	8417.88	8334.51	8448.8
K00966	GMPP; mannose-1-phosphate guanylyltransferase	303.534	342.569	248.718	268.035	218.853	301.1	235.283	344.515	405.649	379.302	452.604	560.661	283.374	237.988	201.964	293.006	501.946	928.742	169.135	289.782	298.614	463.622	296.129	154.642	563.172	452.122	361.514	310.525	585.386	1391.83	355.242	185.271	361.73	228.361	356.289	223.976	506.835	336.21	438.639	319.185	1622.04	536.666	338.323	339.283	284.37
K00967	PCYT2; ethanolamine-phosphate cytidylyltransferase	0.00779268	0.00431865	0.0074468	0.00604246	0.00488454	0.00450199	0.00777213	0.00826844	0.0135683	0.0057114	0.011501	0.0065709	0.00676177	0.00878078	0.00455211	0.00836027	0.00632752	0.0159778	0.00592732	0.00220024	0.0094799	0.0086591	0.00974774	0.00969752	0.00636808	0.00488052	0.00567246	0.00995159	0.00427183	0.0112272	0.00693635	0.00949079	0.00412585	0.0107019	0.00701499	0.00655811	0.0108136	0.00726307	0.00375778	0.00822291	0.0184601	0.00889544	0.00953416	0.00367967	0.00492318
K00968	PCYT1; choline-phosphate cytidylyltransferase	817.166	836.386	677.952	712.415	550.073	753.305	683.247	822.534	938.26	647.979	830.522	1194.6	927.023	791.196	825.444	825.478	804.345	897.264	743.702	628.954	709.381	780.063	721.867	575.639	721.467	1095.95	970.085	800.641	1108	1412.93	741.954	774.584	790.495	468.722	837.162	470.555	824.631	771.302	735.661	786.819	1343.58	612.522	784.25	855.391	664.912
K00969	nadD; nicotinate-nucleotide adenylyltransferase	20251.3	21461.7	16981.3	18148.3	16872	16188	17011.7	20494.6	26382.5	17191	20289.7	21064.6	20463.7	18632.5	20489.4	21895.5	24284.3	16868.6	19267.8	16404.3	20287.9	18619.7	19680.3	17317.3	17638.9	18710.7	20317.2	20280.1	22994.7	20764.8	21808.2	20694.1	18926.5	17782	18513.4	15652.7	19143.5	18430.6	13692.5	19181.3	17902.7	16688.5	20099.5	19054.7	20128.8
K00970	pcnB; poly(A) polymerase	7865.45	8018.91	5452.16	6108.05	5276.54	4767.13	5954.18	6196.03	8624.59	6427.59	6758.79	3309.36	7374.04	6692.33	6694.01	7119.95	4947.35	5932.03	6443.55	4758.32	5972.73	6465.62	6131.38	6052.25	6789.75	5663.99	4598.19	7350.74	6183.98	7124.26	4393.47	7047.13	4202.72	5441.21	4426.8	3703.27	5543.01	6035.76	3767.65	5344.4	5382.22	6435.86	7714.64	5826.63	8023.7
K00971	manC; mannose-1-phosphate guanylyltransferase	21124.6	21433.1	14116.8	18763.9	15874.7	14825.6	18383.5	19071.5	24003.2	17292.8	18539.6	12470.2	18929.7	18513.8	20329.1	20126.3	12546	15600.6	20582	13533.2	17314	16842.3	16508.1	18353.6	16550.7	17999.8	15194.9	20304.1	18278.8	18995.9	13484.2	21130.5	12674.8	17634.6	14519.5	10981.7	15201.8	19036.6	10901.9	15592.2	15704	16115.6	21257	18221.3	20169.5
K00972	UAP1; UDP-N-acetylglucosamine/UDP-N-acetylgalactosamine diphosphorylase	485.076	530.764	564.243	477.176	539.333	592.619	499.226	414.076	567.065	413.375	408.596	1125.3	413.542	606.845	574.428	561.641	880.265	436.113	498.793	388.065	593.607	464.916	513.556	448.685	461.979	749.781	763.436	555.331	825.575	632.434	783.901	443.635	699.992	367.828	619.418	421.962	527.383	435.975	452.199	480.746	584.422	419.491	522.422	633.214	427.944
K00973	rfbA; glucose-1-phosphate thymidylyltransferase	17101.7	18005.5	13687.9	15771.8	14067.2	12524.7	15263	16843.5	21709.8	15086.2	17395.3	16587.2	18162.1	16211	17546.4	17783.4	17961.7	14214.2	16390.5	13390.1	15925.8	16277	16693.3	14304	15493.4	15336.1	15846.2	17495.7	18456	16597.8	16551.1	16749.9	14425	14927.2	14769.5	12497.6	15485.1	15295.6	11042.8	15686.7	14654.4	14318.7	16890.6	15798.7	17358.3
K00974	Unclassified	9922.52	10194.6	9284	9191.21	9070.51	9712.98	8186.14	11041.3	14623.9	8331.56	11005.7	16172.7	10475.5	9666.07	10744.5	11812.1	16930.9	9327.95	9410.54	9359.95	11607.8	9791.66	10674.2	9509.95	8657.11	10931.7	13256.8	10677.7	14630.2	11542.4	14468.7	10445.9	12290.6	10141.2	11444.4	9943.79	11045.8	9471.26	8245.04	11631.1	10759.4	8330.45	10164.8	10035.4	9567.43
K00975	glgC; glucose-1-phosphate adenylyltransferase	20942.1	22029.6	20602.2	20608.8	19215.3	19740.4	16849.6	24483.9	30591.4	18150.4	24459.7	31301.5	24523.2	19675.1	23186.1	25551.9	33494.2	19553.1	21131.2	19822.2	23083.7	21376.4	22790.3	22452.9	18519	21519.8	27135.3	23000.7	26565.9	24863.9	30261.4	24195.8	24797.2	19256.3	25441.7	20132.2	22470.5	21104.6	16368.3	22420.1	20043.6	17398.6	22481.1	20941.8	20415.7
K00976	FPGT; fucose-1-phosphate guanylyltransferase	0.0704045	0.224287	0.107965	0.0886057	0.036456	0.054949	0.0765331	0.186724	0.0484876	0.107749	0.103021	0.432573	0.270531	0.105736	0.0999111	0.089505	0.194199	0.0866792	0.0897884	0.141599	0.127485	0.0839442	0.0754705	0.072993	0.141773	0.082787	0.169717	0.0837292	0.265743	0.17583	0.15982	0.0360058	0.144658	0.0375814	0.153051	0.118681	0.123866	0.0383544	0.106521	0.282054	0.157687	0.106207	0.0697865	0.0981976	0.061421	multiple antibiotic resistance protein
K00978	rfbF; glucose-1-phosphate cytidylyltransferase	4417.16	4510.18	3652.51	4042.14	3170.32	3226.43	3672.23	4599.75	5038.73	3631.83	4696.03	6612.9	4234.17	4207.92	4491.94	4642.73	6307.07	4074.01	4013.56	3454.29	3888.18	3976.6	4389.99	3092.39	3927.45	4499.27	5041.1	4630.12	5293.92	4829.95	5485.22	3671.43	4602.51	3245.89	4227.12	3603.88	4621.83	3412.62	2673.26	4241.3	4526.59	3808.73	4006.45	4102.81	3866.14
K00979	kdsB; 3-deoxy-manno-octulosonate cytidylyltransferase (CMP-KDO synthetase)	11779	12817	8938.01	10076.7	9005.57	7687.16	10180.1	10875.1	13819.5	10097.8	11227.7	6385.96	11507.3	10483.4	11597.7	11363.8	8485.06	8927.91	10838.8	7821.91	9617.24	10258.9	10574.2	9404.1	10118.9	9473.67	7961.3	10918.6	9480.15	10374.1	8429.87	11461.7	7130.39	8621.82	7987.98	6861.59	9416.27	9928.64	5822.48	8658.11	7780.43	9884.78	11444.6	9688.14	11997.7
K00980	tagD; glycerol-3-phosphate cytidylyltransferase	3242.47	3553.63	2842.16	2582.11	3107.1	2800.88	2954.18	3483.61	5117.28	2658.08	3320.38	3872.55	3300.38	3088.61	3614.07	3793.78	5157.3	2799.53	3031.08	3011.22	4367.79	2919.93	3783.71	2423.57	2863.04	3404.25	3829.04	3013.4	5005.75	3469.16	4093.73	3564.45	3932.17	3955.37	3486.86	3070.92	3177.48	3296.62	3054.38	4519.53	3340.44	2799.38	2980.14	3621.55	3271.94
K00981	E2.7.7.41; phosphatidate cytidylyltransferase	19423.1	20865.9	16190.4	17466.9	16142.3	15744.9	16515.7	19730.6	25506.7	16501.7	19876.6	19863.7	19854.5	18277.3	19830.9	21213.9	22609.6	16863.3	18468.6	15556.3	19474.1	17817.1	19102.7	16875.4	16739.5	17992.6	19394.6	19580.3	21820.9	20745.3	20396.1	20047.4	17797.7	17402.8	17644.5	14904.3	18192.5	17796	13147.1	18438.8	17859.1	15946.6	19361.9	18233.3	19418.3
K00982	Unclassified	259.894	207.116	335.865	234.789	205.529	155.338	244.831	332.606	519.93	239.232	370.87	305.468	369.788	259.634	191.235	333.196	514.602	488.072	222.566	156.877	383.723	422.809	403.679	280.578	264.889	237.526	262.134	376.323	399.275	454.698	308.4	394.708	156.884	331.478	437.621	235.298	388.779	347.616	144.706	320.03	569.945	357.81	352.379	331.976	190.325
K00983	neuA; N-acylneuraminate cytidylyltransferase	3411.34	3264.21	2774	3077.68	1934.26	2105.88	2647.79	3124.85	3498.29	2658.39	3204.81	2681.24	3061.59	3228.22	3190.08	2856.54	2574.57	2191.06	3019.67	1933.29	2125.03	3142.25	2590.02	1762.53	3431.1	3000.95	2721.87	3089.56	2971.1	3321.56	2442.57	2544.83	2170.82	2088.35	2773.8	1690.55	3247.96	2723.16	1685.75	2518.9	2812.32	2908.04	3008.33	3039.45	3049.06
K00984	Unclassified	1322.6	1406.85	1477.47	1615.88	1651.67	1220.66	1611.38	1805.35	2451.92	1534.58	1764.38	2436.56	1740.88	1358.26	1694.84	2005.5	2592.04	1295.6	1486.31	1619.7	1952.68	1403.14	1841.73	1518.8	1152.15	1712.51	1802.9	1663.74	2187.92	1478.36	2212.02	1310.5	1962.96	1509.37	1564.57	1529.59	1750.47	1270.26	1235.47	1945.74	1190.15	1267.98	1362.28	1590.68	1640.97
K00986	Unclassified	6253.36	6868.48	5276.64	5919.39	5402.96	5596.79	6174.47	6256.78	8429.93	5436.55	5963.82	5628.81	6137.74	6739.27	6580.02	6703.39	4808.25	5995.52	7277.48	4629.88	5998.12	6006.58	5391.05	6402.43	5320.32	6787.67	5842.04	7357.12	6665.62	7142.6	4839.17	6632.99	4693.1	6989.44	4762.23	3874.66	5664.21	6340.55	4137.78	5560.88	6113.36	5436.88	7480.92	5736.99	6454.09
K00988	APA1_2; sulfate adenylyltransferase (ADP) / ATP adenylyltransferase	1.43266	1.02155	0.559995	4.19925	0.594192	0.852152	1.29219	1.35543	1.07148	2.25651	6.9049	8.46639	1.91393	2.74798	0.934164	1.16182	3.45265	0.638381	0.579534	1.74494	1.10584	2.64593	0.760671	0.359825	1.20309	4.74826	2.90207	0.904249	8.48501	7.74984	3.22365	0.549141	1.15824	0.557525	1.44299	0.850207	1.5024	0.668818	2.01262	3.34248	8.06764	3.737	0.499178	0.890441	1.27019
K00989	Unclassified	2710.25	2965.04	2904.3	2597.59	2387.3	2386.39	2184.2	3481.44	3772.41	2610.04	3331	5109.52	2698.12	2782.09	2556.98	3446.03	4898.49	4016.24	2615.51	2551.21	3366.63	3241.16	3228.67	2358.83	2700.42	3499.84	3845.53	3336.97	4310.01	5134.76	4014.28	3059.05	3875.59	2377.04	3409.89	2834.9	3907.5	2342.17	2327.83	3198.07	5393.97	2535.76	2684.84	2732.27	2347.08
K00990	glnD;	279.958	198.983	336.986	228.132	199.284	153.948	250.379	329.884	483.179	251.023	338.99	301.502	365.027	282.33	180.221	321.67	472.551	539.344	217.858	122.969	362.428	457.785	368.139	268.765	271.402	239.013	249.328	369.155	360.182	499.985	301.022	380.631	149.233	323.185	429.489	215.079	384.455	325.121	136.217	313.119	712.311	419.018	339.01	284.002	163.986
K00991	ispD; 2-C-methyl-D-erythritol 4-phosphate cytidylyltransferase	23505.3	24763	18356.7	20975	18217.6	17208	18614.1	22881.8	26983.1	19160.7	23071.5	22135.4	23102.6	21022.6	22760.1	24083.5	24168	18133.2	21288.6	17156.6	20264.9	20325.5	21155.1	18791.9	19841.9	20173.3	21297.7	23075.1	22274.6	22775.9	22360.8	23806.5	19124.8	17558.8	19976.4	15650.2	20294.5	20273.4	13639.7	18869.8	18573.3	18405.4	22876.6	20916.3	21948
K00992	murU; N-acetyl-alpha-D-muramate 1-phosphate uridylyltransferase	156.991	127.18	212.382	117.506	119.218	149.105	163.409	227.085	374.466	176.413	238.207	132.181	270.638	235.101	161.334	211.814	99.6049	414.267	173.158	64.4821	211.513	245.924	232.393	238.814	125.007	143.07	144.412	251.023	104.633	323.164	184.965	246.514	86.4415	240.845	188.797	163.469	297.363	173.16	92.5205	186.139	407.896	243.453	194.31	97.7507	108.944
K00993	EPT1; ethanolaminephosphotransferase	0.064565	0.180501	0.182467	0.00273703	0.0551377	0.028337	0.141089	0.0146713	23.261	0.0359584	1.09237	0.329732	0.0200122	0.00275609	9.40661	16.7761	0.246512	0.141288	0.0303874	0.0208484	0.214367	0.13927	0.0278617	0.000266103	0.0102446	0.0710741	0.396925	9.7781	1.00963	0.0032883	0.139226	0.000646328	0.173107	0.0394955	0.179849	0.155565	0.313053	0.00102628	0.111233	0.00205284	14.4105	0.0514992	0.000608198	0.0587664	9.41203
K00995	pgsA; CDP-diacylglycerol---glycerol-3-phosphate 3-phosphatidyltransferase	15732	15150.8	12948.6	14261.1	12203.6	11998.7	11541.4	15267	20186.8	13063.8	16668	20139.9	16116.5	14172.2	15030.6	16927	23198.5	12912.3	12213	13407.8	15635.8	14662.3	15861.5	12129.5	14131.3	14191.5	17069.6	15667.3	19580.9	16397.7	19181.9	13975.7	16898	12274	15251.7	13298.6	15615.7	12603.1	10683.3	15515.6	15779.9	12629.4	14424.1	14306.3	15247.3
K00996	Unclassified	523.517	829.551	735.19	476.631	717.283	528.376	559.328	1043.93	1073.39	683.617	657.145	477.225	412.668	466.078	532.877	625.153	825.736	606.852	685.7	437.424	873.572	492.043	1034.11	628.13	819.266	560.452	465.652	446.593	506.726	506.66	689.694	1164.8	432.19	501.517	837.508	380.046	513.834	757.801	365.074	429.597	758.658	471.503	542.474	581.463	576.96
K00997	acpS; holo-	5469.41	5736.07	5284.93	4410.45	5257.08	4976.19	5099.87	6305.37	8660.56	4523.11	5703.28	8344.05	5150.57	5006.14	6185.1	6221.08	9320.63	5432.46	5111.28	4992.87	6745.92	5283.35	6264.48	4456.49	4720.04	5860.78	6501.33	5156.24	8310.64	6362.11	7478.28	5369.43	6147.95	5970.18	5697.91	5309.33	5648.71	5487.87	4389.85	6497.29	6150.36	4707.27	4980.72	5842.04	5467.96		uncharacterized protein
K00998	pssA; CDP-diacylglycerol---serine O-phosphatidyltransferase	3.50131	21.0005	0.872024	5.00142	5.00044	24.0006	9.00129	9.00156	0.000965673	20.0005	5.31156	0.00384292	0.000305557	0.00142881	40.4066	23.0008	0.331143	13.3084	32.5004	0.000739045	28.0002	2.31271	0.000354697	9.00014	1.97915	1.74483	0.00104446	0.00074879	0.00200025	0.00170472	16.0003	26.0003	6.0007	21.5804	60.2511	19.744	11.0009	16.0005	1.74424	0.00106423	0.00640487	0.000936161	0.000315302	0.000295674	23.4174
K00999	CDIPT; CDP-diacylglycerol--inositol 3-phosphatidyltransferase	17.3263	6.7205	1.64268	18.6563	5.89939	7.9786	16.9032	20.4897	12.7949	7.05013	48.5801	51.5516	4.08798	18.7687	5.9712	11.2783	15.3051	6.98407	4.86022	9.85277	2.27506	2.17145	4.72619	1.87631	17.0617	13.3728	13.8919	9.89021	26.5354	22.4002	4.6793	4.43511	9.36035	5.04871	14.4866	2.57253	11.2483	7.09624	5.78723	14.2162	83.9362	12.3239	4.12787	4.08314	16.6063
K01000	mraY; phospho-N-acetylmuramoyl-pentapeptide-transferase	19585.9	21226.6	16647.9	17917	16804.7	15948.1	16877.1	20128.6	25909.9	16898.8	20064.6	20514.9	20276.1	18318	20225.5	21623.1	23397.2	16636.2	18735.8	16024.3	19917.7	18225.8	19459.4	17217.1	17082.9	18284.6	19753.3	19793.8	22347.8	20610.7	21151.3	20395.6	18442	17516.6	18000.4	15304.9	18524.1	18228	13299.2	18835.4	17391.8	16287.9	19620.1	18736.8	19826.6
K01001	ALG7; UDP-N-acetylglucosamine--dolichyl-phosphate N-acetylglucosaminephosphotransferase	34.1086	65.2999	0.0720141	10.0639	81.7998	88.5896	30.4674	65.4896	0.304671	36.1365	18.4537	1.05765	5.47643	0.645597	0.174402	42.116	4.62142	2.20339	0.884901	36.1598	3.95767	3.1396	45.7881	0.0344074	20.9193	7.84835	0.437662	0.47599	0.937944	8.06808	57.4266	32.1336	37.1625	0.164233	10.7021	0.164722	1.32145	0.348205	0.164822	0.265433	4.40849	1.11945	6.87864	21.5501	0.385434
K01002	Unclassified	2229.05	2352.71	1907.79	2197.12	1776.38	2127.57	1270.34	2573.11	3245.22	1562.33	2911.44	2458.78	2868.07	1891.58	2401.9	2591.27	2946.68	1827.23	1960.77	2011.75	1964.94	2155.9	2038.57	2809.86	2025.76	1655.52	2614.65	2232.71	1940.54	2580.14	3085.92	3275.63	2016.08	1918.47	3649.06	1872.04	1982.69	2441.24	1590.02	2131.47	1730.09	1711.68	2778.8	2066.53	2061.57
K01003	bcpA; oxaloacetate decarboxylase	0.915609	0.356374	0.0823146	0.987098	0.308438	0.418158	0.897907	1.08553	0.676717	0.370125	2.57742	2.67339	0.215032	0.993973	0.308438	0.58947	0.79812	0.356374	0.253626	0.517583	0.112682	0.112682	0.24675	0.0959692	0.898004	0.706066	0.726596	0.520906	1.39447	1.18591	0.22622	0.238028	0.486722	0.260502	0.760975	0.123375	0.596345	0.370125	0.301659	0.740347	4.45564	0.651254	0.219344	0.20569	0.877474
K01004	pcs; phosphatidylcholine synthase	25.0226	9.10746	9.08626	21.0488	11.1026	14.8961	18.5701	24.8817	26.0018	11.9584	56.0771	95.358	11.4487	20.9442	17.555	24.8145	22.4632	15.9762	7.15904	14.9975	9.06948	18.7722	12.2834	10.5069	25.7854	16.7202	28.2192	11.7535	40.0757	29.1948	20.8555	12.1649	16.3615	7.46031	27.7632	7.73977	15.5256	12.8424	10.3919	23.3719	114.066	29.1567	4.98039	8.14121	19.1349
K01006	ppdK; pyruvate, orthophosphate dikinase	17002.1	18287.9	14175.6	15928	13843.1	12627.3	14319.1	16709	20951.3	14664.6	18037.5	17672.8	18093.8	15577.1	16895.2	18511.4	20020.3	14238.4	15746.5	13533.8	15825.3	15620.3	16401.2	14266.3	15170.8	15572.2	16655.4	17413.3	17981.7	18042	17835.6	16890.9	15398.2	13089.9	15867	12897.5	16176.3	14860.5	11017.1	15284.6	14776.6	14123.7	16796.7	15540.5	16782.8	zinc protease [EC:3.4.24.-]
K01007	pps; pyruvate, water dikinase	2604.69	3814.66	3015.75	2533.67	2369.85	2725.2	2699.29	3566.59	4195.75	2142.53	2905.68	4017.05	2329.61	3329.96	3319.57	3255.45	3818.18	3037.01	2553.48	2224.16	3399.33	2856.08	3103.69	2002.18	2222.63	3031.82	3336.12	2504.28	3622.4	3409.64	4154.41	2816.95	3269.97	2463.87	2725.51	2365.69	3346.02	2677.89	2095.3	3154.46	3763.1	2626.79	2621.46	2810.3	2877.62
K01008	selD; selenide, water dikinase	6690.64	8301.64	7475.83	7081.33	7256.18	6602.12	6830.32	8972.82	10557.2	6497.63	8806.5	10808.1	8869.18	6743.81	8255.71	9364.13	11683.5	7115.55	7795.07	6852.12	8396.68	7524.61	8421.84	7953.85	6070.06	7527.67	9370.21	8227.3	8564.64	8503.23	10538	8247.83	8379.97	6901.85	8066.33	7509.91	7954.61	7139.99	5498.35	8219.63	6176.49	6304.87	7696.64	7216.5	7308.41
K01011	TST; thiosulfate/3-mercaptopyruvate sulfurtransferase	1085.63	1043.38	778.627	903.677	729.831	1074.82	868.122	1149.39	1316.33	845.433	1295.41	1976.9	1188.94	1098.35	1188.75	1004.77	1556.97	1225.54	903.052	857.434	905.972	1095.21	1108.26	887.196	986.356	1037.77	1306.87	995.303	1442.51	1514.69	1362.09	827.657	984.86	1032.16	1243.35	977.075	1066.71	926.43	718.731	1190.34	1700.22	1022.48	979.495	1089.99	1324.84
K01012	bioB; biotin synthase	17470.1	21878.6	16713.5	17005.4	17017.1	16203.2	16827.2	21404.7	24528.1	15679	18546.1	19825.9	17766	17922.1	20213.8	20579.5	19704.6	18319.7	20139.7	14348.3	18905.1	18129.3	17778.1	18456.7	15853.3	18607.4	18814.1	19320.3	19063.2	20564.9	21090.9	20740.7	17365.3	18029.5	17213.2	13718.7	17169.2	18588.2	12602.2	16754.5	18839.3	15979.8	20293.8	17491.3	17999.8
K01014	SULT1A; aryl sulfotransferase	0.388895	0.712826	2.31264	0.113909	4.32326	1.04182	0.352504	0.500264	0.664316	0.701087	5.95675	1.28801	3.09388	2.77768	6.75151	0.701962	1.53126	14.6994	0.125518	3.06548	0.609055	6.7858	0.549771	2.48308	11.0439	11.8868	2.96098	6.07853	3.17811	15.8048	0.969523	0.107969	0.406814	0.237298	0.838887	4.54386	1.55857	0.317129	4.59283	3.09886	20.3736	18.8624	0.296436	2.17404	6.21129
K01015	SULT2B; alcohol sulfotransferase	0.202672	5.04301e-06	1.16482e-06	1.39683e-05	4.36467e-06	5.91731e-06	1.27062e-05	0.12654	0.253058	5.2376e-06	3.64727e-05	3.78308e-05	0.126527	1.40656e-05	4.36467e-06	8.34152e-06	0.151914	5.04301e-06	3.58903e-06	0.177288	0.151904	0.151904	3.49173e-06	1.35805e-06	1.27076e-05	9.99146e-06	1.0282e-05	7.37129e-06	0.151922	1.67817e-05	3.20121e-06	0.253052	6.88754e-06	3.68633e-06	1.07685e-05	1.74587e-06	8.43881e-06	5.2376e-06	4.26874e-06	1.04766e-05	6.30513e-05	9.21582e-06	3.10392e-06	2.91069e-06	1.2417e-05
K01016	SULT1E1; estrone sulfotransferase	0.00102768	0.000401728	9.27904e-05	0.00111272	0.000347691	0.000471375	0.00101218	0.0012209	0.000757279	0.000417229	0.00290543	0.00301361	0.000239618	0.00112047	0.000347691	0.000664488	0.000896355	0.000401728	0.000285904	0.000579558	0.000123684	0.000123684	0.000278153	0.000108183	0.00101229	0.000795923	0.000819066	0.000587199	0.00156859	0.00133684	0.00025501	0.000262761	0.000548664	0.000293654	0.00085782	0.000139076	0.000672239	0.000417229	0.00034005	0.000834568	0.00502269	0.000734136	0.000247259	0.000231867	0.000989146
K01017	CHST11; chondroitin 4-sulfotransferase 11	3.74094e-11	1.46236e-11	3.37773e-12	4.0505e-11	1.26566e-11	1.71589e-11	3.68451e-11	4.4443e-11	2.75663e-11	1.51879e-11	1.05763e-10	1.09701e-10	8.7225e-12	4.07871e-11	1.26566e-11	2.41886e-11	3.26289e-11	1.46236e-11	1.04074e-11	2.10969e-11	4.50232e-12	4.50232e-12	1.01253e-11	3.93804e-12	3.68491e-11	2.8973e-11	2.98155e-11	2.13751e-11	5.70996e-11	4.86632e-11	9.28281e-12	9.56495e-12	1.99723e-11	1.06895e-11	3.12262e-11	5.06263e-12	2.44707e-11	1.51879e-11	1.23784e-11	3.03797e-11	1.82835e-10	2.67238e-11	9.00067e-12	8.44036e-12	3.60066e-11
K01021	Unclassified	7.49001e-05	2.9279e-05	6.7628e-06	8.1098e-05	2.53406e-05	3.4355e-05	7.37703e-05	8.89826e-05	5.51924e-05	3.04088e-05	0.000211755	0.00021964	1.74639e-05	8.16629e-05	2.53406e-05	4.84296e-05	6.53287e-05	2.9279e-05	2.08374e-05	4.22397e-05	9.01442e-06	9.01442e-06	2.02725e-05	7.88463e-06	7.37782e-05	5.8009e-05	5.96957e-05	4.27966e-05	0.000114323	9.74321e-05	1.85858e-05	1.91507e-05	3.99881e-05	2.14023e-05	6.25201e-05	1.01363e-05	4.89945e-05	3.04088e-05	2.47837e-05	6.08255e-05	0.000366067	5.35057e-05	1.80209e-05	1.68991e-05	7.20915e-05
K01023	Unclassified	1171.87	892.132	1214.4	979.225	811.078	851.188	1093.22	1384.39	2080.15	903.564	1135.86	656.484	1190.68	1182.34	950.755	1290.74	1157.44	2210.11	1019.01	521.203	1613.11	1333.63	1526.52	1401.5	890.269	813.208	980.865	1455.54	719.956	1496.2	1345.87	1617.93	891.899	1712.21	1144.99	1148.36	1683.1	1224.13	728.443	1387.7	1683.48	1258.74	1413.75	886.959	842.76
K01024	HS3ST1;	1.90162e-05	7.43357e-06	1.71699e-06	2.05898e-05	6.43367e-06	8.72232e-06	1.87294e-05	2.25916e-05	1.40127e-05	7.72041e-06	5.37621e-05	5.57639e-05	4.43388e-06	2.07332e-05	6.43367e-06	1.22957e-05	1.65862e-05	7.43357e-06	5.29036e-06	1.07241e-05	2.28865e-06	2.28865e-06	5.14694e-06	2.00181e-06	1.87314e-05	1.47278e-05	1.5156e-05	1.08655e-05	2.90253e-05	2.47368e-05	4.7187e-06	4.86212e-06	1.01525e-05	5.43378e-06	1.58731e-05	2.57347e-06	1.24391e-05	7.72041e-06	6.29227e-06	1.54428e-05	9.29398e-05	1.35844e-05	4.57528e-06	4.29046e-06	1.83031e-05
K01025	Unclassified	0.118283	0.133419	0.0912102	0.047209	0.0779518	0.0926183	0.0984059	0.0785088	0.087842	0.138565	0.141464	0.509735	0.108818	0.0915879	0.17143	0.159297	0.302802	0.0632735	0.0805623	0.18667	0.185085	0.119944	0.146419	0.0518669	0.150264	0.140448	0.2145	0.0860438	0.403226	0.206858	0.327882	0.0596239	0.138904	0.0629096	0.233618	0.139102	0.184879	0.102194	0.157307	0.189691	0.691025	0.249625	0.0860012	0.133485	0.0978407
K01026	pct; propionate CoA-transferase	6705.92	8118.77	7011.31	6943.76	6051.66	5926.12	5515.23	8270.28	9126.99	6667.21	8404.88	15042.6	7007.48	6882.41	7071.64	9406.46	13504.7	8471.61	6625.81	7310.16	8247.63	7825.02	7447.6	5602.96	6483.98	9454.01	10720.6	8936.8	10879.9	9873.31	11955.7	6372.16	11134.4	6348.14	8103.96	8478.08	9801.25	5265.31	6036.73	8582.16	9433.7	6120.49	7337.71	7649.13	5793.94
K01027	OXCT; 3-oxoacid CoA-transferase	3.39641	2.85327	2.50665	0.379224	3.07045	2.74878	2.77925	3.05074	3.69074	4.98889	1.32719	10.1143	4.66344	2.67923	2.02815	6.45256	6.08945	6.41395	3.8278	3.64599	4.99891	19.3741	2.67515	2.9771	4.52414	7.08007	5.34263	9.01208	15.5993	20.8715	6.79223	0.337914	3.59413	2.29116	5.70637	4.34533	11.4324	4.33957	4.05634	3.18893	24.3102	7.49982	4.03863	2.7071	4.19561		alpha-D-xyloside xylohydrolase
K01028	scoA; 3-oxoacid CoA-transferase subunit A	1980.41	2397.75	2384.35	2209.77	2495.29	1797.23	2210.63	2460.64	3262.8	2232.43	2543.71	3665.25	2584.85	2370.25	2615.16	2897.41	3626.95	2080.59	2237.14	2211.95	3004.34	2418.61	2750.04	2263.92	1990.11	2349.23	3028.52	2420.23	2749.11	2193.05	3656.01	1917.58	2992.74	2211.95	2558.93	2408.21	2583.03	2099.6	1903.51	2707.37	1949.75	1902.54	2301.74	2645.75	2213.68
K01029	scoB; 3-oxoacid CoA-transferase subunit B	2020.56	2541	1933.21	1920.7	1550.62	1785.69	1641.4	2075.74	2570.11	1942.73	2260.39	4028.96	1988.62	2264	2107.41	2666.87	3221.55	2803.43	1862.2	1984.11	2102.66	2345.05	2172.57	1581.14	1993.47	2930	2871.16	2604.52	3066.11	3280.28	2835.7	1735.48	2750.92	1748.64	2183.52	2304.37	2912.82	1469.64	1530.51	2458.71	3071.3	1905.24	2051.23	2224.82	1669.73
K01031	pcaI; 3-oxoadipate CoA-transferase, alpha subunit	47.3309	36.433	12.5454	45.0319	17.6318	27.1512	48.3961	37.994	33.8056	21.6794	83.0255	119.741	25.4503	53.4975	24.8473	44.2932	28.5345	62.2291	25.9456	17.3436	17.6565	38.1144	20.3497	26.4146	43.0375	66.4548	33.4411	39.2974	55.073	90.9478	16.1662	14.866	19.2263	11.8445	39.3567	20.0835	39.2913	22.5156	51.0534	37.1137	178.204	49.4373	19.9527	18.5908	26.8416
K01032	pcaJ; 3-oxoadipate CoA-transferase, beta subunit	32.6453	6.76208	4.98862	23.1089	7.9016	8.28058	25.7297	21.1839	22.4507	8.46358	54.7208	75.2888	12.2286	28.2505	6.96763	28.0079	16.9149	21.2386	14.962	11.5104	11.4161	18.732	4.96127	12.7914	22.1709	22.3456	22.1742	24.1858	34.7405	37.9345	5.8448	6.78237	9.91219	6.62192	29.4101	9.59523	13.5367	10.8662	44.4827	21.3347	108.935	21.5887	5.37156	8.22038	16.8691
K01034	atoD; acetate CoA/acetoacetate CoA-transferase alpha subunit	3787.54	4946.43	3933.3	3606.05	3247.91	3358.66	2964.54	4253.53	4955.16	3781.62	4534.75	8054.53	3555.37	3869.14	3868.34	5318.43	6913.97	4941.14	3656.63	3976.36	4420.97	4537.54	4146.84	2960.93	3634.18	5431.24	5764.23	5118.55	5896.02	5809.85	5946.65	3327.47	5902.2	3578.92	4276.76	4505.62	5655.57	2809.23	3204.08	4796.43	5360	3455.47	4063.12	4181.49	3132.53
K01035	atoA; acetate CoA/acetoacetate CoA-transferase beta subunit	4036.75	5231.72	4179.42	3817.53	3412.15	3613.43	3163.69	4435.7	5183.49	3966.32	4756.79	8587.56	3773.21	4143.48	4108.55	5637.27	7283.31	5355.66	3885.19	4196.48	4644.55	4801.61	4400.29	3130.54	3845.48	5891.58	6145.74	5517.61	6298.73	6350.52	6265.03	3530.18	6198.12	3753.04	4536.63	4767.66	6012.15	2989.19	3367.99	5067.69	5739.58	3675.77	4281.7	4433.99	3289.83
K01039	gctA; glutaconate CoA-transferase, subunit A	1296.32	1640.39	1348.59	1207.67	1241.8	1229.97	1286.22	1507.58	1629.92	1134.18	1836.59	3461.1	1266.5	1460.69	1730.94	1772.13	3145.71	1700.35	1395.35	1347.79	1481.21	1324.53	1649.92	1214.11	1230.45	1592.57	2330.89	1619.33	2067.77	1668.94	2479.53	1098.33	1974.65	1416.15	1479.21	1862.22	1627.82	1089.21	1125.94	1763.48	1703.79	1231.13	1475.03	1376.85	1140.59
K01040	gctB; glutaconate CoA-transferase, subunit B	1085.04	1387.55	1105.08	986.353	1033.13	986.453	1033.08	1333.35	1368.47	962.91	1554.73	2853.3	1035.14	1214.87	1465.58	1524.66	2446.23	1495.32	1179.5	1190.27	1205.51	1133.62	1406.18	1034.61	1050.58	1340.9	1968.67	1333.53	1707.16	1439.77	2127.99	916.376	1683.86	1256.19	1226.89	1583.82	1454.71	919.297	955.595	1486.73	1452.55	1070.64	1229.85	1154.25	980.645
K01042	selA; L-seryl-tRNA(Ser) seleniumtransferase	2279.01	2478.32	2247.43	2020.13	1951.34	2222.69	1810.52	2591.3	2836.49	1968.1	2520.5	4493.39	2185.37	2137.39	2411.64	2862.28	4126.15	2631.26	2093.18	2118.22	2347.93	2253.23	2754.44	1754.25	2067.86	2749.5	3212.34	2526.14	3026.4	2719.85	4001.58	1977.43	2750.22	2027.5	2405.73	2449.56	2665.79	1890.44	1791.42	2435.97	2842.79	1875.72	2143.36	2243.28	1702.98
K01045	Unclassified	0.00540161	0.00211153	0.000487718	0.00584859	0.0049086	0.00247761	0.00532014	0.00641722	0.00398035	0.00990033	0.0152713	0.0231918	0.00125946	0.00588933	0.00182751	0.010432	0.00471135	0.00211153	0.00395338	0.0130667	0.000650099	0.0141286	0.00993731	0.000568621	0.0184222	0.00418347	0.00430511	0.00308639	0.0174381	0.0282693	0.0165727	0.0013811	0.00288385	0.00154348	0.0209522	0.000731002	0.00353337	0.00913234	0.00975542	0.00438659	0.107538	0.0393051	0.00669383	0.00121872	0.00519907
K01046	lip; triacylglycerol lipase	1912.57	2188.2	1994.66	1806.45	1878.41	2017.92	1857.78	2089.09	2427.2	1701.55	2284.67	4389.15	1903.29	2169.3	2281.36	2466.81	3995.72	2479.24	1985.96	1789.26	2127.35	2052.63	2409.74	1807.78	1888.37	2464.59	3041.16	2343.32	2879.72	2730.77	3434.08	1782.39	2821.64	1863.37	2419.24	2269.36	2274.86	1596.63	1559.5	2295.2	2364.34	1793.28	1959.26	2161.36	1728.61
K01047	PLA2G; secretory phospholipase A2	1.68673e-06	6.59356e-07	1.52297e-07	1.82631e-06	5.70666e-07	7.73669e-07	1.66129e-06	2.00387e-06	1.24292e-06	6.84799e-07	4.76869e-06	4.94625e-06	3.93285e-07	1.83903e-06	5.70666e-07	1.09063e-06	1.47119e-06	6.59356e-07	4.69254e-07	9.51229e-07	2.03003e-07	2.03003e-07	4.56533e-07	1.7756e-07	1.66147e-06	1.30635e-06	1.34433e-06	9.63771e-07	2.57454e-06	2.19415e-06	4.18548e-07	4.31269e-07	9.00523e-07	4.81975e-07	1.40794e-06	2.28266e-07	1.10335e-06	6.84799e-07	5.58124e-07	1.36978e-06	8.24375e-06	1.20494e-06	4.05827e-07	3.80563e-07	1.62349e-06
K01048	pldB; lysophospholipase	1044.77	957.018	898.232	811.14	759.254	726.776	712.418	1074.12	1331.56	696.646	1164.49	1716.19	902.111	806.928	1056.09	1131.9	1893.95	1075.97	794.067	910.169	1052.71	953.814	1039.82	767.879	806.098	950.317	1203	972.867	1326.89	1033.17	1665.74	895.084	1144.43	921.291	1161.2	896.607	1036.43	894.837	692.768	997.287	1086.73	743.545	866.806	927.651	832.584
K01049	ACHE; acetylcholinesterase	7.97891	4.92904	18.4683	5.81893	8.5155	9.25873	4.82235	5.24114	17.4061	5.37784	10.056	31.4782	36.0221	7.27656	7.38005	12.692	28.2754	3.55709	12.1288	15.5148	13.7247	32.3078	7.72453	4.3947	6.09808	16.6141	26.7985	6.69166	17.7888	6.57781	16.7377	40.1244	11.292	8.78122	25.9533	12.9555	23.202	40.4844	23.0695	33.311	2.89775	3.07322	2.6602	14.4205	9.02109
K01050	Unclassified	0.0361802	0.0141431	0.00326675	0.0391741	0.0122407	0.0165951	0.0356345	0.0429828	0.0266605	0.0146889	0.102288	0.106096	0.00843591	0.039447	0.0122407	0.0233938	0.0315568	0.0141431	0.0100654	0.0204038	0.00435439	0.00435439	0.00979257	0.00380865	0.0356384	0.0280211	0.0288358	0.0206728	0.0552235	0.0470643	0.00897781	0.00925068	0.0193161	0.0103383	0.0302002	0.00489629	0.0236667	0.0146889	0.0119717	0.0293816	0.176827	0.0258458	0.00870494	0.00816304	0.0348236
K01051	E3.1.1.11; pectinesterase	11977.6	13033.6	7498.07	11652.9	8101.11	6167.76	8605.69	10560.8	11254.7	10086.2	10912.1	4970.14	12470.2	9571	9864.38	10448.9	9853.7	5301.11	7428.64	7591.79	7780.95	8408.17	10641	7032.28	10950	6431.77	6275.2	9875.32	8168.92	8049.71	7581.29	10806.8	7152.74	5975.99	7868.8	5976.08	9118.45	8212.88	4557.63	7321.13	5708.41	8604.87	8568.34	9412.67	12855.3
K01053	gnl; gluconolactonase	334.07	342.819	197.432	315.575	197.828	233.914	274.375	225.385	365.951	275.233	306.814	290.757	334.686	348.599	312.625	264.48	157.442	331.275	213.629	222.577	202.751	395.059	328.816	217.737	320.718	246.989	195.535	193.584	258.43	337.64	190.549	228.155	171.61	198.655	300.947	180.694	260.299	241.081	178.975	333.779	655.192	370.54	297.924	294.22	339.231
K01054	MGLL; acylglycerol lipase	1.45888	0.106168	0.0387516	0.0620616	0.0195466	0.0262908	0.0564539	0.0680954	0.0422369	1.92548	0.162049	0.168451	0.0133646	1.16329	0.0193923	0.0374091	0.0499939	2.25058	0.0160689	0.0328264	0.00689844	0.441161	0.0159383	0.00603385	0.677026	1.13029	0.0456831	0.0327508	0.17171	3.65488	0.61551	0.0146554	0.0306015	0.0163785	0.048668	0.00775693	0.0374939	0.0236183	0.0193651	0.549119	11.5015	3.3264	0.0140609	0.0129323	0.0551692
K01055	pcaD; 3-oxoadipate enol-lactonase	319.438	336.365	309.51	355.896	305.107	232.689	262.652	485.591	512.887	413.725	482.561	786.17	273.526	321.673	323.304	462.871	621.406	350.207	245.898	347.742	387.327	413.812	347.922	280.997	418.604	327.462	513.41	371.106	523.82	348.757	639.414	213.721	619.751	333.033	361.022	387.563	511.077	229.453	288.198	440.34	497.755	374.962	339.625	406.801	291.196
K01056	Unclassified	19371.2	20790.1	16124.6	17453	16035.6	15516.7	16335.4	19507.5	25201.9	16375	19662.6	20084.6	19691.3	17937.1	19656.9	20954.4	22813.9	16333.4	18235	15525.7	19270.9	17723.9	18879.3	16568.2	16673.4	17800.8	19279.5	19395.8	21828.2	20186.4	20258.3	19935.9	17759.3	17049.1	17408.3	14885.3	17982.5	17618	12954.8	18427.8	17319.8	15977.8	19256.3	18119.6	19326.3	sulfate permease, SulP family
K01057	PGLS; 6-phosphogluconolactonase	4564.27	5186.39	3087.42	4383.81	2604.65	2503.69	3505.05	3844.56	4529.41	3947.72	4356.38	1910.33	5383.79	4162.88	4067.26	4113.39	3780.47	2416.74	2938.3	2910.98	3015.83	3746.91	4343.13	2487.6	4660.44	2767.88	2436.29	4143.92	3551.78	3509.72	2925.55	4091.11	2704.75	2123.2	2956.16	2328.17	3887.27	3257.02	2018.42	3009.48	2617.46	3780.24	3810.21	3603.67	5403.49
K01058	pldA; phospholipase A1/A2	606.638	1411.01	673.339	388.988	709.463	669.441	602.434	444.497	685.1	614.502	657.24	347.45	872.885	633.161	706.379	703.159	334.264	582.227	676.722	615.411	647.454	914.192	845.191	411.886	580.367	740.837	461.137	748.936	566.179	670.22	463.318	841.879	598.248	605.066	551.388	405.719	925.323	657.49	703.623	706.922	454.948	696.997	926.521	609.591	700.258
K01060	cah; cephalosporin-C deacetylase	2373.29	1821.8	1896.08	1924.6	1871.36	1724.2	1666.8	2550.43	3236.84	1925.95	2222.84	3098.53	1989.73	1676.5	2059.83	2543.64	3450.71	1728.21	1622.61	1962.05	2502.69	1751.46	2571.48	1694.82	1608.74	2132.94	2208.68	2190.09	2630.2	2117.36	2582.23	1573.47	2654.26	2424.64	2055.73	2049.66	2258.04	1670.8	1520.52	2441.86	1880.88	1437.62	1665.07	1866.79	1751.44
K01061	E3.1.1.45; carboxymethylenebutenolidase	369.621	313.172	334.717	358.189	220.329	242.791	359.271	362.052	650.485	312.51	444.44	596.143	507.086	463.473	378.064	336.059	406.086	375.414	285.713	253.033	233.583	377.235	347.966	323.41	330.732	378.39	332.89	309.573	483.888	529.977	344.343	281.621	254.374	214.458	533.547	256.455	364.809	249.659	206.788	361.137	843.953	439.603	311.36	313.168	364.801
K01065	Unclassified	1.99977e-10	7.81726e-11	1.80562e-11	2.16525e-10	6.76575e-11	9.17253e-11	1.96961e-10	2.37577e-10	1.4736e-10	8.1189e-11	5.6537e-10	5.86422e-10	4.66274e-11	2.18034e-10	6.76575e-11	1.29303e-10	1.74423e-10	7.81726e-11	5.56342e-11	1.12777e-10	2.40678e-11	2.40678e-11	5.4126e-11	2.10514e-11	1.96982e-10	1.54879e-10	1.59383e-10	1.14264e-10	3.05234e-10	2.60136e-10	4.96226e-11	5.11308e-11	1.06765e-10	5.71425e-11	1.66924e-10	2.7063e-11	1.30812e-10	8.1189e-11	6.61705e-11	1.62399e-10	9.7737e-10	1.42856e-10	4.81144e-11	4.51192e-11	1.92479e-10
K01066	Unclassified	1704.89	1154.83	1166.58	1148.39	918.779	1301.97	1257.38	1087.15	1477.42	989.468	1344.93	1686.95	1150.64	1375.42	1248.24	1359.39	1331.37	951.739	1297.72	840.211	1329.07	1153.49	1236.19	824.611	1091.09	1356.27	1587.26	1278.2	1702.67	1385.97	1433.48	1115.67	1209.82	1418.46	1436.33	738.297	1335.28	1396.16	1011.59	1413.73	1229.13	1057.4	1420.49	1631.55	1007.26
K01067	E3.1.2.1; acetyl-CoA hydrolase	54.9309	62.9918	29.64	33.3219	36.0973	31.3324	38.2805	30.3065	47.4908	55.0667	36.8303	31.5689	53.4503	58.0204	39.9278	48.966	24.8069	83.0419	43.4545	31.0351	35.4045	136.3	47.0782	27.1279	49.7649	61.1455	28.964	52.2849	56.0306	155.438	36.9352	28.9906	21.7637	30.2919	55.6731	28.8991	55.055	43.5375	34.0667	46.4757	234.479	96.2027	64.0929	33.3067	49.1959
K01068	ACOT1_2_4; acyl-coenzyme A thioesterase 1/2/4	0.000366938	0.000143439	3.31312e-05	0.000397302	0.000124145	0.000168307	0.000361403	0.000435929	0.00027039	0.000148973	0.0010374	0.00107602	8.55565e-05	0.000400069	0.000124145	0.000237258	0.000320047	0.000143439	0.000102083	0.000206934	4.41619e-05	4.41619e-05	9.93157e-05	3.86271e-05	0.000361442	0.000284188	0.000292451	0.000209662	0.000560073	0.121296	9.10523e-05	9.38198e-05	0.000195903	0.000104851	0.000306288	4.96578e-05	0.000240026	0.000148973	0.000121416	0.000297986	0.0612179	0.000262126	8.82849e-05	8.2789e-05	0.000353179
K01069	gloB; hydroxyacylglutathione hydrolase	129.322	155.206	150.532	95.5821	123.048	93.4729	110.058	71.2575	215.383	227.314	122.891	164.829	56.3083	67.2962	115.679	139.556	204.107	71.9645	101.085	75.9657	182.594	123.913	342.098	67.1493	195.085	166.098	99.5236	79.8168	123.578	118.25	105.71	89.7905	91.963	76.2418	168.035	79.9861	107.985	119.758	44.0472	87.2511	210.989	110.722	54.8585	73.5359	101.028
K01070	frmB; S-formylglutathione hydrolase	37.5943	68.9912	60.805	40.3091	8.95624	49.8983	49.6946	105.744	59.3516	58.6503	98.8447	66.4745	77.6778	114.974	60.5287	84.7744	42.7031	64.452	39.4159	30.5402	57.2536	48.7906	60.8485	36.3094	62.1235	202.959	137.036	63.2053	120.162	102.924	48.325	47.4235	78.8977	53.7353	110.048	8.29813	55.3133	37.0185	95.4663	52.9481	141.116	95.5918	33.426	77.4885	67.4003
K01071	MCH; medium-chain acyl-	1395.55	996.824	918.892	706.339	1225.1	1921.63	835.474	993.343	2244.68	827.785	591.05	1715.5	843.886	1271.24	1363.24	1140.54	2353	697.446	972.345	1318.64	2049.97	798.837	1378.8	694.225	897.998	1058.26	1726.36	849.338	2851.92	1346.94	1727.95	1105.98	1808.44	2338.05	845.735	1305.52	985.272	1437.98	1415.73	1909.99	1139.3	758.191	919.167	1471.6	1472.81
K01073	Unclassified	398.275	752.621	353.42	265.598	583.648	379.118	442.629	413.403	628.15	391.46	433.348	1077.07	411.897	666.342	666.299	449.98	864.622	478.299	476.944	667.69	698.508	454.001	468.052	285.964	317.879	614.654	649.825	477.809	1698.4	788.711	610.242	476.021	645.065	625.952	353.324	705.391	538.648	363.82	293.44	619.23	391.323	321.21	290.564	451.756	820.97
K01074	PPT; palmitoyl-protein thioesterase	5.93368e-78	2.31952e-78	5.35758e-79	6.42468e-78	2.00752e-78	2.72165e-78	5.84417e-78	7.04931e-78	4.37242e-78	2.40902e-78	1.67755e-77	1.74002e-77	1.38352e-78	6.46943e-78	2.00752e-78	3.83666e-78	5.17542e-78	2.31952e-78	1.65076e-78	3.34628e-78	7.14134e-79	7.14134e-79	1.60601e-78	6.24631e-79	5.8448e-78	4.59554e-78	4.72917e-78	3.3904e-78	9.05683e-78	7.7187e-78	1.47239e-78	1.51714e-78	3.16791e-78	1.69552e-78	4.95292e-78	8.03007e-79	3.88141e-78	2.40902e-78	1.9634e-78	4.81867e-78	2.90003e-77	4.23879e-78	1.42764e-78	1.33876e-78	5.71118e-78
K01075	E3.1.2.23; 4-hydroxybenzoyl-CoA thioesterase	104.268	67.347	152.675	66.1808	75.9248	64.9856	114.669	141.005	259.942	113.189	183.26	48.006	184.396	147.949	81.6193	121.481	80.0463	492.724	114.637	28.0893	142.006	137.814	157.59	168.193	76.189	81.3188	119.272	159.133	71.9942	572.406	100.878	160.961	58.1129	168.101	98.595	104.515	173.801	103.551	121.072	119.513	550.335	173.148	150.299	62.2352	72.1325
K01077	E3.1.3.1; alkaline phosphatase	13337.5	14131.6	10122.2	11719.7	9733.93	9083.16	11262.1	11993	15922.6	11401.6	12586.2	8910.36	13265.7	12456.3	13194.7	13303.8	10680.4	10866	12449.1	9195.67	11571.4	11721.9	11720.9	10746	11748.5	11464.5	10236.5	13645	12073.2	13119.6	9854.15	12938.2	9376.07	10570.7	9570.81	8196.04	11113.2	11325.3	7549.4	10595.8	9912.05	10988.3	13524.9	11278	13691.8
K01078	PHO; acid phosphatase	13.3014	22.8882	15.5044	43.2609	11.1907	18.8309	32.0644	18.0311	37.3191	17.4951	15.9737	21.4395	51.6636	28.0342	37.6372	9.43006	10.0596	45.9211	1.73335	27.9937	32.388	71.668	13.0622	27.7361	47.7602	13.1205	3.72994	24.6443	19.2996	55.4593	12.4326	27.2341	13.5796	50.1893	30.9563	24.4356	14.6267	42.5686	12.9229	17.9525	86.0182	82.2135	72.8439	25.7964	51.853
K01079	serB; phosphoserine phosphatase	7918.86	8632.92	5376.99	7076.16	5770.59	5091.36	6631.08	7294.72	8764.28	6685.36	7087.77	3437.6	8175.49	7028.2	7258.27	7729.16	5108.43	5509.92	7070.66	5020.86	6441.68	6292.64	6699.68	6464.17	6799.72	5740.07	5059.97	7723.08	6039.76	6380.92	4923.8	7959.77	4544.59	6108.68	5014.84	4048.91	5868.67	6832.84	3901.08	5520.23	4760.89	6242.4	7898.08	6459.87	8233.85
K01080	PLPP1_2_3; phosphatidate phosphatase	1.16184e-14	4.54171e-15	1.04904e-15	1.25798e-14	3.9308e-15	5.3291e-15	1.14431e-14	1.38028e-14	8.56137e-15	4.71696e-15	3.28472e-14	3.40702e-14	2.70898e-15	1.26674e-14	3.9308e-15	7.51233e-15	1.01337e-14	4.54171e-15	3.23226e-15	6.55215e-15	1.3983e-15	1.3983e-15	3.14464e-15	1.22305e-15	1.14444e-14	8.99826e-15	9.2599e-15	6.63855e-15	1.77336e-14	1.51135e-14	2.883e-15	2.97062e-15	6.20289e-15	3.31989e-15	9.69803e-15	1.57232e-15	7.59996e-15	4.71696e-15	3.84441e-15	9.43515e-15	5.67837e-14	8.29972e-15	2.79537e-15	2.62136e-15	1.11827e-14
K01081	E3.1.3.5; 5'-nucleotidase	10328	11509.4	7774.76	9225.93	8028.81	7419.92	8891.88	9932.97	13099.4	8689.31	9658.76	5676.83	10244.8	9487.3	10100.2	10494.4	7416.46	7763.02	9681.82	7085.18	9197.92	8514.61	9347.55	8258.44	8803.25	8488.16	7472.98	9664.49	8839.7	9329.47	7447.02	10591	6633.59	8622.99	7098.86	5836.86	7899.95	9491.1	5929.83	8264.94	7409.25	8436.85	9931.84	9066.24	10506.1
K01082	cysQ; 3'(2'), 5'-bisphosphate nucleotidase	7668.72	7443.8	4724.14	6239.13	5291.45	4380.98	5786.08	5954.61	7867.73	5955.75	6363.21	2822.25	6940.99	6306.33	6505.97	6559.39	4324.03	4375.04	6419.23	4571.12	5429.3	5911.8	5484.53	5723.95	6183.25	5272.67	4206.64	6861.99	5320.47	5436.87	3936.88	6851.26	3671.69	5206.18	4244.57	3496.39	4973.83	5878.31	2921.89	4855.07	3957.65	5607.42	7216.8	5665.49	7600.52
K01083	E3.1.3.8; 3-phytase	262.011	203.689	153.298	287.531	121.503	174.421	226.745	148.627	324.798	221.983	153.988	152.038	329.037	308.267	286.226	129.237	91.2056	225.878	151.748	155.535	150.704	339.289	264.056	189.711	237.633	162.229	102.36	162.933	168.92	191.274	119.675	164.204	89.9014	202.459	236.039	138.987	161.5	200.459	107.48	224.078	410.468	202.751	277.933	255.407	302.987
K01085	agp; glucose-1-phosphatase	572.794	322.937	291.348	460.628	256.391	373.031	490.881	298.973	630.629	426.506	654.952	300.241	421.233	476.896	472.796	414.886	169.681	178.686	513.901	321.044	341.726	412.946	397	319.001	431.52	457.216	406.738	383.111	577.141	387.723	226.808	359.583	240.897	218.335	516.363	262.343	315.944	489.712	254.982	405.735	305.208	397.591	440.171	465.03	428.081
K01086	fbp-SEBP; fructose-1,6-bisphosphatase I / sedoheptulose-1,7-bisphosphatase	12.7441	8.14448	47.1493	5.66515	2.45131	8.44175	24.9365	51.1479	89.3449	29.2897	26.0913	10.5706	95.5905	45.4361	21.8606	15.5388	1.08389	21.7128	26.7843	7.29082	1.49804	21.7663	29.7176	41.1035	8.21298	14.9137	26.7952	36.5247	20.3409	52.1607	8.57571	27.0136	9.99234	10.4794	17.6525	15.937	38.5441	10.149	5.31294	17.226	23.2803	55.2744	18.5898	10.4201	14.2083
K01087	otsB; trehalose 6-phosphate phosphatase	106.22	89.6943	106.909	71.3794	59.9759	53.0806	107.566	165.561	206.405	135.237	175.706	290.072	131.778	116.8	72.2044	101.243	110.507	109.282	69.3306	69.7055	48.3842	118.811	121.892	81.3067	207.463	91.2033	118.506	99.1898	164.622	169.621	91.0981	70.5766	68.9943	50.3766	204.117	70.9785	168.411	94.8038	56.5843	96.869	301.129	196.592	54.3872	115.705	79.7349
K01089	hisB; imidazoleglycerol-phosphate dehydratase / histidinol-phosphatase	8063.63	9036.96	5271.16	7132.52	5988.1	5143.66	6657.33	7137.9	8552.33	6703.62	7026.87	3378.77	7944.26	7006.08	7379.74	7648.95	4827.6	5309.33	7150.33	5083.41	6280.04	6265.06	6578.42	6368.68	6764.68	5609.42	4819.84	7522.24	5726.85	6247.97	4752.17	7978.52	4434.82	6070.46	5132.93	4072.72	5985.25	6785.63	3755.75	5451.5	4868.24	6119	7825.19	6451.15	8301.37
K01090	Unclassified	11624.1	13477.7	12004.3	11297.8	11605.5	11407.8	10247.4	13816.4	17654.1	10225.4	13535.6	18071.4	12494.9	11699	13335	14630.5	19432.8	11521.1	12153	11499.8	14296.1	11951.2	12864.8	10958.4	10553.5	12856.9	15761.3	12820.8	17069.2	15231.3	16929.4	14011.6	14680.2	11952.9	13786	11977	13692.3	11754.8	9915.77	13784.7	13866.5	10253.1	12126.8	12921.9	11700.7
K01091	gph; phosphoglycolate phosphatase	44341.8	47817.7	38710.1	42987.9	38713.2	36726.5	37955.8	48439.6	58990.7	38726.8	48654.3	46921.7	48512.3	40936.5	47188.3	50994.9	52286.1	39899.8	44391.3	37031.9	44416.9	41247.2	43724.3	45333.6	38067	41076.1	45994.1	47014.5	46216.9	49444	50850.1	50223.7	41806.6	38311.9	43441.1	35222.7	42538.4	42530.3	29994.2	41337.5	39226.8	36963.2	47336.9	42201.4	44375.3
K01092	E3.1.3.25; myo-inositol-1(or 4)-monophosphatase	11822.2	12308.5	8657.82	10678.2	8975.16	8906.71	9165.24	11662.6	14639.2	9459.51	11828.9	9633.1	12363.8	10967.8	11541.9	11813	11156.1	9473.73	10138	9001.99	10266.3	10285.8	10328.5	10288.6	9780.99	9177.29	9697.71	11599.7	11599.7	12490.9	10898.7	12317.5	8840.9	9506.13	9586.47	7814.02	9691.87	10419.4	6557.08	9433	10236.3	9419.68	11585.1	9648.48	12388.9
K01093	appA; 4-phytase / acid phosphatase	162.388	410.416	163.066	213.518	91.3261	310.033	255.358	158.257	168.81	116.125	163.37	149.926	141.251	299.386	301.754	225.705	104.96	335.842	201.305	67.8633	121.098	221.133	202.942	184.62	131.21	331.773	143.315	227.99	192.065	241.1	218.564	174.914	15.5812	128.052	216.845	137.712	304.567	142.303	100.566	153.747	311.842	235.205	255.623	116.706	163.37
K01095	pgpA; phosphatidylglycerophosphatase A	3374.16	3539.99	2260.25	2986.8	1888.22	1653.59	2328.16	2383.01	3241.84	3024.44	3124.24	940.448	3901.83	3038.5	2473.77	2925.13	2946.38	1633.26	1682.87	1984.18	2173.32	2657.38	3344.62	1778.67	3620.89	1661.16	1412.81	2856.86	2255.15	2252.72	2114.3	2625.94	1775.45	933.895	1695.39	1663.74	2675.53	1942.45	963.541	1822.47	1598.56	2776.3	2492.4	2022.95	3820.5
K01096	pgpB; phosphatidylglycerophosphatase B	22.2852	1.06479	0.0296318	0.00486389	17.9195	0.0077511	0.00989388	20.908	124.499	72.8397	21.9045	58.7646	23.8907	50.4474	71.6623	50.7697	110.55	1.37887	103.029	115.584	32.8581	12.7878	69.6793	45.7851	0.404349	46.4629	93.6512	0.00855509	103.587	29.6154	25.2908	0.00589929	64.6937	63.5362	85.1625	40.8136	0.0183016	81.6941	15.9401	32.2183	17.0259	13.0179	0.0115988	84.602	287.6
K01097	NANP; N-acylneuraminate-9-phosphatase	0.000250132	9.77785e-05	2.25847e-05	0.00027083	8.46262e-05	0.00011473	0.000246359	0.000297162	0.000184318	0.000101551	0.000707167	0.000733498	5.83217e-05	0.000272717	8.46262e-05	0.000161733	0.000218168	9.77785e-05	6.95874e-05	0.000141061	3.01041e-05	3.01041e-05	6.7701e-05	2.63311e-05	0.000246386	0.000193724	0.000199356	0.000142921	0.000381788	0.000325379	6.20681e-05	6.39546e-05	0.000133542	7.14739e-05	0.000208789	3.38505e-05	0.00016362	0.000101551	8.27663e-05	0.000203129	0.0012225	0.000178685	6.01816e-05	5.64352e-05	0.000240753
K01101	E3.1.3.41; 4-nitrophenyl phosphatase	1423.3	929.605	603.929	597.19	915.531	1286.61	704.974	940.072	1864.05	706.096	755.964	1958.8	867.488	1016.35	1028.88	970.099	2222.11	550.886	647.046	1377.96	1722.77	703.011	1068.95	411.144	746.559	1047.31	1530.23	803.339	2890.62	905.26	1610.36	1096.3	1492.12	1883.18	754.122	1086.98	1049.01	1060.6	1121.46	1823.97	1081.69	705.536	854.501	1216.05	1306.89
K01104	Unclassified	34452.1	35178.7	28075.9	28992.1	27840.4	28113.3	27200.3	33470.8	45394.8	28107.3	34440.8	41219	35912.8	30797.2	33671.8	37623.9	48573.2	27390.6	29681.7	29365	35636	30815.7	34606.4	25766.6	29109.6	31950.4	36128.6	33739.8	42233.6	35057.1	38500.4	33531.9	34715.3	31726.4	31421.2	28933.2	33023.7	29921.9	25392.3	35929.4	29149.9	26876	31809.5	32013.4	33726.1
K01113	phoD; alkaline phosphatase D	1087.84	600.223	770.906	299.822	367.662	322.704	227.22	180.686	817.808	428.177	496.322	293.125	254.286	436.547	590.599	268.938	170.222	229.239	512.452	371.726	204.676	1242.57	268.197	123.331	551.496	680.089	268.56	487.891	458.541	403.087	156.556	227.656	132.437	331.716	529.111	163.548	726.897	426.258	200.317	488.513	543.85	771.67	892.908	499.235	480.211
K01114	plc; phospholipase C	713.259	405.222	465.453	603.474	310.058	516.396	389.678	672.983	958.035	550.213	514.209	712.309	671.239	712.351	634.016	393.584	593.525	547.561	330.058	396.885	425.033	642.397	716.298	422.365	535.13	455.609	372.648	465.006	637.58	665.933	492.696	335.87	534.25	385.735	623.055	366.131	502.172	391.481	308.98	527.914	787.988	430.927	397.96	470.655	582.994
K01115	PLD1_2; phospholipase D1/2	0.285327	0.000684616	0.00212815	0.00280264	0.700062	0.0028294	0.00108057	0.178718	0.354476	0.00224338	0.00440955	0.0299148	0.595952	0.00244061	0.00390219	0.00466495	0.358175	0.00642907	0.0021729	0.66852	0.215059	0.212801	0.00206447	0.350975	0.772435	0.00261706	0.00553229	0.560591	0.219449	0.491942	0.00944124	0.351736	0.00489637	0.00346831	0.00442865	0.00559679	0.00119738	0.00324828	0.00272727	0.00697295	1.3327	0.242827	0.00023557	0.00484652	0.00296923
K01117	sph; sphingomyelin phosphodiesterase	5.67835	18.1249	4.12793	2.45644	10.0031	3.87937	6.84997	4.64658	3.33108	4.21793	7.20194	3.28736	3.17317	2.54056	3.87251	12.3219	5.64343	1.43742	4.52665	4.63532	7.54138	9.0754	4.50677	1.95493	4.14018	3.0715	7.25012	0.140057	10.6955	2.87668	4.22709	4.39679	6.05984	4.17888	5.30933	5.75278	11.5428	2.74317	2.93615	5.541	1.50037	5.89453	4.2051	0.621749	4.71603
K01118	Unclassified	3137.01	3821.77	3427.71	3164.96	2991.97	3065.21	2593.53	3645.61	4582.03	2806.02	3636.23	6403.26	3011.7	3523.81	3634.44	4198.67	6045.68	3812.78	3357.98	3355.82	4192.67	3630.17	3730.69	2680.82	3110.22	4078.12	5031.73	4102.91	4975.72	4676.04	5342.55	3224.71	4784.62	3042.64	3906.42	3966.93	4344.77	2707.46	2830.63	4157.51	4944.52	3298.64	3507.98	3543.53	3013.29
K01119	cpdB; 2',3'-cyclic-nucleotide 2'-phosphodiesterase / 3'-nucleotidase	12321.8	12142.3	7947.76	10425.7	8835.11	8315.28	9823.65	10465.6	13580.1	9709.71	10883.4	8311.78	11347.8	10385.4	11008.5	12011.8	10565.2	7988.39	10759	8378.65	10275.7	9146.12	10041.6	9115.86	9607.35	9779.37	9364.68	11665.3	11389.6	10496.8	8684.43	11812.4	8406.4	9758.79	8058.06	7476.11	9294.5	9877.93	6344.02	9795.29	7868.35	8894.29	11029.1	10144.3	11698.4
K01120	cpdP; 3',5'-cyclic-nucleotide phosphodiesterase	95.4781	76.1777	58.9928	95.5085	45.7816	61.6684	74.8945	47.6923	115.401	79.9147	32.2138	30.0618	116.525	104.89	100.747	45.1583	27.2196	81.1302	60.008	50.7297	47.8623	114.754	106.21	67.3087	78.9174	41.6045	29.598	53.5047	46.043	50.5891	42.0477	57.352	28.5229	62.7809	81.0245	46.017	57.906	64.5832	30.9608	83.53	87.9336	54.8028	90.2007	91.1131	98.2566
K01121	Unclassified	5.72025	4.88314	1.07924	4.03381	1.39811	7.56773	3.63188	9.77598	17.0209	5.71663	7.10504	12.6154	3.48536	11.9665	9.4713	10.1855	7.07917	9.67148	8.30589	5.72819	4.58478	0.97322	5.51369	8.03798	9.22832	10.6069	23.1324	10.013	2.71027	7.64703	7.43128	1.96198	6.29097	1.17375	1.23233	0.911261	4.12216	1.18589	0.506716	3.30947	7.11556	3.15819	0.854636	15.3054	5.43976
K01126	E3.1.4.46; glycerophosphoryl diester phosphodiesterase	26324.9	26895.8	18921.9	23409.6	19639.9	18134.4	21010.1	24246.9	31266.4	23090.7	24993.2	18865.4	28386.1	23670.6	24246.5	26176.4	26838.1	17104	21665.3	18882.9	22982.8	21801.7	25029.1	19764.7	24385.8	19256.7	19959.9	25221.1	24305.1	21133.6	21816.8	24183.9	20704.8	20109.2	17890.5	16646.5	20792	21103	14532.8	21851.7	15558	20752.1	23239.9	21928.5	28901.5
K01127	GPLD1; glycosylphosphatidylinositol phospholipase D	0.00148494	0.000580475	0.000134077	0.00160782	0.000502395	0.000681112	0.00146255	0.00176414	0.00109423	0.000602874	0.00419819	0.00435451	0.000346235	0.00161902	0.000502395	0.00096015	0.00129519	0.000580475	0.000413115	0.00083743	0.000178717	0.000178717	0.000401916	0.000156318	0.0014627	0.00115007	0.00118351	0.000848472	0.00226654	0.00193166	0.000368476	0.000379675	0.000792791	0.000424315	0.0012395	0.000200958	0.00097135	0.000602874	0.000491353	0.00120591	0.00725752	0.00106079	0.000357276	0.000335035	0.00142926
K01128	Unclassified	0.0062236	0.00243285	0.000561935	0.0067386	0.0021056	0.00285463	0.00612972	0.00739375	0.00458605	0.00252673	0.0175952	0.0182503	0.00145112	0.00678553	0.0021056	0.00402412	0.0054283	0.00243285	0.00173142	0.00350978	0.000749027	0.000749027	0.00168448	0.00065515	0.00613038	0.00482008	0.00496024	0.00355606	0.00949935	0.00809584	0.00154433	0.00159127	0.00332269	0.00177836	0.00519493	0.000842242	0.00407106	0.00252673	0.00205933	0.00505411	0.0304172	0.0044459	0.00149739	0.00140418	0.00599023
K01129	dgt; dGTPase	18794.9	20657	15996.7	18101.5	15334.6	14744.2	15541.4	19419.5	23904	16212.7	20400.1	20370.6	20313.3	17180.6	19139.1	21327.2	21834.7	15885.5	17500.8	15609.9	17532.9	17660.5	18082.6	17093.8	16586.4	17452.9	19307.5	19676.9	20308.3	20315.8	20751.5	19652	17922.4	15186.6	18904.2	14331	18844.6	17104.4	12521.9	17307.4	16594.1	15714.8	19205.6	18014.9	18528.5
K01130	E3.1.6.1; arylsulfatase	10795.5	11068.3	6772.22	8767.63	7423.66	5896.37	7679.08	7960.1	10874.1	8513.43	8811.93	3617.52	10460.5	8900.1	9233.33	8844.59	6407.47	6617.47	7937.91	6424.75	7379.12	8578.65	8524.37	7985.98	8921.71	7437.19	5631.86	9769.22	7388.24	8505.43	5408.05	9472.37	5263.59	6778.4	5546.52	4671.2	7162.39	7994.66	4278.59	6771.85	6310.19	8493.96	9864.66	7792.87	11057.6
K01131	STS; steryl-sulfatase	0.930388	1.44475	2.46067	3.81863	1.85444	3.94631	3.00746	1.96119	3.71919	2.83353	3.38048	2.08444	1.18574	2.04771	5.2816	1.54709	2.65767	4.20114	3.1923	2.14716	3.289	0.00725033	2.2506	1.25867	2.3735	1.45144	2.85198	3.21711	0.537303	2.15485	4.11857	2.64104	1.78626	1.08243	2.9148	2.36921	0.877816	1.23765	1.54689	1.23734	2.12461	2.68992	2.44843	2.86829	1.08501
K01132	GALNS; N-acetylgalactosamine-6-sulfatase	0.450088	0.178497	0.0678802	0.143687	0.0428858	0.300449	0.263161	0.301454	0.417175	0.55644	0.666657	0.65793	0.292002	0.644684	0.305556	0.43269	0.196761	2.94888	0.117206	0.23013	0.257317	1.60435	0.239556	0.245174	0.927124	1.52587	0.448508	0.214755	0.605694	3.31919	0.418372	0.0256157	0.151596	0.101479	0.519636	0.248826	0.757162	0.175524	0.576853	0.860415	4.51637	4.83831	0.134128	0.37434	0.382101
K01133	Unclassified	6194.68	5894.09	3226.09	5091.83	3367.22	2432.35	3674.45	4290.03	4796.1	5134.28	5750.43	2679.34	6753.9	4692.32	4170.15	5076.21	6729.61	2273.48	2750.95	3752.75	3515.1	3784.97	5177.75	3053.41	5837.05	2452.62	2935.8	4772.27	4485.19	3201.11	3841.37	4211.73	3985.09	1523.95	2712.82	3196.85	4104.63	2955.86	1628.05	3473.21	1906.85	4244.19	3768.07	3765.49	7226.43
K01134	ARSA; arylsulfatase A	2799.32	3014.37	1419.19	2373.12	1657.82	935.188	1529.64	1846.31	2188.44	2323.19	2551.1	542.503	3114.12	1984.67	1825.39	2256.15	2502.8	1451.79	1151.25	1710.82	1613.94	1750.01	2365.84	1418.7	2642.23	995.723	1030.38	2200.44	1617.6	2328.72	1435.22	2112.09	1465.42	642.643	1147.95	1189.04	1731.79	1333.41	815.925	1317.15	1574.94	2026.11	1842.33	1693.92	3246.25
K01135	ARSB; arylsulfatase B	16.0688	28.2787	37.0989	21.4427	16.5929	17.5382	32.5141	35.9189	25.7795	26.1983	155.481	16.2218	34.6546	34.8641	12.0145	23.6885	16.8272	665.554	44.2702	8.61404	26.3459	52.3383	19.926	7.23029	41.4102	37.3921	76.3527	22.154	53.1809	994.511	20.9367	34.295	19.5857	32.1508	16.8312	2.23378	27.2681	14.3999	175.011	36.1386	940.896	81.9735	38.6383	11.2147	27.5358
K01136	IDS; iduronate 2-sulfatase	60.2769	67.608	52.457	33.1388	63.8185	49.0525	32.8315	34.0975	38.3058	43.9135	68.5147	58.2371	37.8628	51.967	50.0223	78.1001	72.7094	114.596	47.4337	51.538	71.7457	62.7931	45.059	34.992	63.1541	70.9076	90.9831	34.9524	98.5539	117.669	110.574	58.5831	58.0351	66.7972	51.2936	40.6022	61.2628	54.1737	62.4876	84.0328	148.97	157.356	70.5984	66.4947	55.4842
K01137	GNS; N-acetylglucosamine-6-sulfatase	278.177	505.725	300.053	310.033	380.931	182.372	297.793	318.115	383.012	270.003	364.734	194.434	305.139	270.485	377.039	242.824	95.0863	852.567	400.955	222.953	309.95	380.158	244.099	401.417	313.727	307.414	356.16	367.093	244.382	1242.97	220.144	351.362	233.272	450.75	274.538	148.903	281.106	314.258	347.957	284.322	1091.49	396.668	446.729	356.426	292.905
K01138	Unclassified	2285.92	2672.61	2457.4	2288.95	2400.41	1908.97	2421.34	2617.62	3459.61	2346.57	2737.31	3019.61	2742.22	2638.63	3098.84	2570.08	3300.52	2889.96	2571.79	1889.08	2540.74	2763.2	2876.25	2404.23	2498.61	2318.46	2765.83	2775.9	2810.73	3209.91	2829.71	2138.39	2677.8	2457.13	2366.42	2182.52	2174.02	2336.74	1971.65	2692.33	2520.27	2230.4	2268.18	2095.01	2382.55
K01139	spoT; GTP diphosphokinase / guanosine-3',5'-bis(diphosphate) 3'-diphosphatase	232.919	103.749	274.875	195.898	118.394	196.132	127.194	338.456	469.38	278.814	197.156	129.142	332.073	164.441	166.932	136.788	216.295	196.526	170.749	108.532	208.989	180.852	384.54	174.385	245.058	183.408	151.051	209.11	120.36	256.893	192.167	248.663	116.588	139.518	264.726	119.004	183.702	213.641	92.8789	119.777	201.249	174.475	159.429	97.8248	144.227
K01141	sbcB; exodeoxyribonuclease I	134.73	73.2436	172.477	96.9281	95.2107	94.8885	112.307	140.019	281.393	97.579	146.621	43.8103	157.129	160.525	92.2693	146.463	77.9775	352.363	117.319	33.8079	168.887	172.784	180.937	168.898	105.899	100.374	92.632	194.538	68.781	268.652	131.712	164.478	57.9621	201.521	188.905	114.68	206.408	147.577	79.7611	142.173	264.122	192.452	159.306	83.1019	130.672
K01142	E3.1.11.2; exodeoxyribonuclease III	19246.2	19542.8	15832.4	16901.9	15509.5	15168	15789.2	18904.8	24945.5	15902.5	19198.7	19334	18954.3	17483.9	19310.8	20380.5	22343.1	15705.4	17808.1	15013.9	18691.5	17116.7	18216.3	16451.6	16194	17379.1	18943.8	18840.4	21313.8	19486.8	19822.3	19306.5	17088.3	16898.8	16832.2	14496.2	17478.7	17358.7	12208.6	17915.9	16581.9	15529.7	18813.8	17871.8	18799.6
K01143	Unclassified	5.29927	3.67357	3.19919	5.50072	7.08122	4.06268	6.98504	5.72017	9.59979	6.05251	6.95255	3.31892	6.29776	7.81468	10.6462	4.83458	1.41143	6.25155	5.62239	2.47232	3.34582	7.00248	6.79703	7.85553	8.8143	4.12347	2.86293	6.14987	5.84347	6.16789	2.90375	4.98043	3.63041	6.73051	1.82501	2.32226	1.93126	6.99024	1.59226	5.09794	1.62246	6.37974	2.86399	3.47286	6.23703
K01144	Unclassified	8274.54	8835.74	5359.47	7161.5	5852.67	5151.63	6743.73	6959.89	8842.4	6894.9	7125.61	3260.85	8230.36	7248.71	7545.71	7550.59	4722.02	5270.83	7329.99	5191.99	6242.11	6553.74	6702.41	6450.01	6993.24	5864.63	4866.52	7706.99	6029.73	6268.54	4625.34	7871.47	4470.3	5977.25	4973.82	4052.97	5836.85	6846.08	3806.07	5704.72	4441.7	6257.38	8049.13	6618.02	8497.32
K01146	Unclassified	3.50131	1.00051	0.000118243	0.00141794	0.000443062	0.000600673	0.00128982	0.00155579	0.000964999	0.000531675	0.00370239	0.00384024	0.000305344	0.00142781	0.000443062	0.000846756	0.00114222	0.000511921	5.50036	0.00073853	0.00015761	0.00015761	0.00035445	0.000137857	0.00128996	0.00101424	0.00104373	0.000748267	0.00199886	0.00170353	0.000324959	0.000334835	0.000699162	0.750374	60.2511	0.000177225	0.000856633	0.000531675	0.000433324	0.00106349	0.0064004	0.000935508	0.000315082	0.000295467	0.00126047
K01147	Unclassified	238.631	402.478	314.638	254.732	153.683	337.738	335.796	298.755	463.489	226.827	288.544	183.598	337.149	412.75	368.078	346.163	171.899	573.186	299.128	96.8954	275.181	328.089	341.937	331.569	189.554	348.985	236.569	392.087	235.409	444.14	311.3	328.351	81.9216	304.639	311.19	245.772	456.646	250.701	158.85	259.136	483.459	390.279	372.181	174.29	251.129
K01150	Unclassified	193.066	293.271	224.848	199.115	128.943	249.258	240.35	205.279	307.123	147.498	201.082	123.15	201.895	302.531	244.542	245.281	135.825	452.858	208.718	65.7572	219.435	272.608	263.671	244.46	150.037	260.136	161.873	287.15	153.928	320.928	238.099	251.202	56.8627	246.458	244.975	175.614	346.088	203.57	118.212	203.975	380.632	291.27	294.506	119.409	161.595
K01151	nfo; deoxyribonuclease IV	12125.6	14023	11118.5	11858.3	10521.2	9778.29	10142.9	13868.2	15946.8	11136.4	13979	15282.2	14221.8	11490.3	12684.1	14268.6	18434.4	11046.8	10826.6	10959.9	12741.6	11911.5	13345.9	10540.1	11500.5	11339.7	13295.6	13160.2	14139.9	14027	16070.5	12819.5	13940.7	9497.65	12376.2	10835.3	13153.8	10359.3	8779.58	12352.5	11457.4	10353.8	11950.8	11349.4	13057
K01152	Unclassified	3.21049e-17	1.255e-17	2.89878e-18	3.47615e-17	1.08619e-17	1.47258e-17	3.16206e-17	3.81411e-17	2.36575e-17	1.30343e-17	9.0766e-17	9.41456e-17	7.48568e-18	3.50036e-17	1.08619e-17	2.07587e-17	2.80022e-17	1.255e-17	8.93166e-18	1.81054e-17	3.8639e-18	3.8639e-18	8.68952e-18	3.37964e-18	3.1624e-17	2.48647e-17	2.55877e-17	1.83442e-17	4.9003e-17	4.17629e-17	7.96653e-18	8.20867e-18	1.71403e-17	9.17379e-18	2.67984e-17	4.34476e-18	2.10008e-17	1.30343e-17	1.06232e-17	2.6072e-17	1.56909e-16	2.29345e-17	7.7244e-18	7.24354e-18	3.0901e-17
K01153	Unclassified	27781.5	31163.1	25725.8	25957.5	25626.4	25133.1	24261.6	28432.4	37156.3	23895.4	28339.3	32056.4	29874.5	27213	29976.4	32056.3	36407.8	24379.4	27524.4	23570	30784.4	26038.4	28830.1	26696.4	24083.3	27818.4	30988.8	29809.9	31622.2	30002.1	33183.6	30292.7	28279.7	25758.8	27684.1	23153.7	27312.6	27093.8	20446.3	28215.6	24164.9	24305.2	29947.3	28279.5	28255.4
K01154	Unclassified	40503.4	45951.7	34832.1	38019.3	36246.2	34714.9	33098.4	41663	51975.6	34735	40844.9	39584.3	44371.6	37319.6	42441.8	45334.5	47396.6	31705.8	37675	34357.7	41516.4	35862.1	41785.8	37034.9	36015.5	36652	40570.7	41014.4	42067.5	39330.7	45455.7	44157.9	39241.7	34959.8	38627.8	30508.1	39104.6	37906.7	28446.1	38175.2	32072.3	34590.1	41294	39363.3	43167.5
K01155	Unclassified	12929.4	14271.4	9697.84	12099.6	10984.8	9434.8	11880.3	13006.2	16336.9	11021.8	12341.1	6479.48	13092.5	11934.8	13253.2	13792.5	8792.27	9799.05	13580.3	8869.87	11715.3	10463.4	10977.2	13201.7	10512.4	10246.5	9353.52	12724.5	10042.1	11585.5	9476.48	14210.4	7797.67	11443.3	8906.88	7431.64	9018.96	12588.6	6286.63	9583.74	8142.87	10154.3	14074.9	11190.1	13663.6
K01156	Unclassified	10750.3	12600.2	10205.7	10596.8	10692.9	9854.85	9885.91	12156.6	15827.3	9382.49	11454.4	10010.4	10957.1	10691.9	12456.4	13330.1	11672.9	10370.8	12128.8	9092.34	12010.6	10208.7	10931.6	13122.3	8895.59	10909.8	11611.4	11577.1	11315.7	12442.7	12522.5	13050.6	10104.5	11161.3	10117.4	8482.05	9842.81	11917.9	7430.69	10308.3	10388.2	9582.75	13203.8	10663.7	11587.2
K01158	DNASE2; deoxyribonuclease II	0.0800372	0.00661681	0.0440181	0.0378762	0.0460101	0.051463	0.00277365	0.050786	0.0719072	0.0432454	0.0361687	0.587246	0.0412809	0.0299106	0.153925	0.0901275	0.160456	0.130514	0.0421227	0.0878344	0.0988487	0.0559554	0.042539	0.0330516	0.0820832	0.0402999	0.102707	0.0411453	0.168188	0.0482225	0.205026	0.0228446	0.0944761	0.0688483	0.0852074	0.117892	0.0121887	0.0645881	0.0553601	0.133465	0.0761727	0.0473733	0.00239109	0.0998272	0.043976
K01159	ruvC; crossover junction endodeoxyribonuclease RuvC	15152.9	16937.8	12904.7	14171.9	12617	11015.7	13655.1	15584.5	19267.5	13731.5	15425.1	13973.4	15142	14158.1	15349	16577.6	15672.5	13132.3	14751.7	11671	14696.9	14287.7	14639.2	12706.2	13516.6	14281.2	13662.2	15385	15979.6	15573.6	14697.5	15072.5	13281	12240.4	12833.1	10888.9	14793.1	13385.7	9492.96	13346.5	13792.4	12939.9	15037.3	14230.7	15218.3
K01160	Unclassified	90.0836	94.3777	73.8463	63.0799	60.8492	53.0946	71.4156	79.7188	111.603	71.5457	103.324	137.385	92.1753	85.8052	57.722	89.5015	131.752	119.029	64.3758	50.0568	103.596	108.444	98.5254	71.793	65.8133	121.749	100.953	101.7	113.06	120.579	106.085	81.6057	96.9693	70.0473	159.515	71.5044	125.731	81.916	77.3166	113.241	187.676	78.0369	94.4161	72.0164	58.6291
K01161	Unclassified	4.1514e-06	1.62281e-06	3.74834e-07	0.400349	1.40453e-06	1.90416e-06	4.08878e-06	4.93194e-06	3.05909e-06	0.181848	0.509605	0.473659	0.145901	0.181851	1.40453e-06	2.68426e-06	0.145904	1.62281e-06	1.15493e-06	0.0726	4.99632e-07	0.291801	1.12362e-06	4.37013e-07	4.08922e-06	0.436999	0.145904	2.37204e-06	0.692151	0.801399	0.218499	1.06144e-06	2.21637e-06	1.18624e-06	3.46523e-06	5.61811e-07	2.71557e-06	1.68543e-06	0.145902	0.218501	0.364418	0.364401	9.98824e-07	9.36645e-07	3.99574e-06
K01163	Unclassified	15285.8	17520.7	13309.6	14631.4	12981.3	12352.9	13301.2	16338.8	19529.1	13629	16211.7	16111.3	16397.4	14563.1	15995.1	17426.9	18044.4	13026.7	14994.1	12297.6	15048.5	14071.6	15381.7	14293.2	13653.3	14457.9	15457.1	16374.1	16211.1	15830	16666.4	16199	14604.9	12636.4	13644.4	11925.6	14503.3	14048.1	10015.9	14019.5	12635.7	12856.8	15808.5	14092.7	15725.7
K01165	RNASEL; ribonuclease L	0.194481	0.231286	0.194197	0.143403	0.0990917	0.0879266	0.269045	0.169014	0.132527	0.0887031	0.441418	0.710703	0.0503039	0.144402	0.0797413	0.357896	0.359827	0.192073	0.0665303	0.0941141	0.230003	0.154906	0.0630248	0.0139422	0.138215	0.171692	0.500468	0.0756761	1.20793	0.172287	0.171464	0.0338636	0.242468	0.0766183	0.288292	0.173147	0.398035	0.053771	0.15422	0.107556	0.786272	0.144306	0.0318658	0.0880782	0.166251
K01166	Unclassified	1.61388	0.171261	6.55892	1.45375	2.7624	2.50438	0.128949	1.01562	10.6858	3.1433	5.65268	15.0385	6.3542	0.751758	10.4692	5.55298	2.12791	1.38867	0.0870672	2.12098	3.71494	16.4107	5.30188	7.97955	6.16178	3.44233	6.32335	4.98928	6.33973	4.91899	5.84511	5.87811	3.3637	0.0805234	3.76923	1.92032	1.43032	2.87078	3.99171	5.38025	11.7024	12.4853	0.0748212	0.169861	1.29633
K01167	Unclassified	20.9438	7.76403	3.26422	21.1599	7.65233	10.0259	18.5942	23.5022	15.7832	8.73971	53.5788	71.6676	5.53909	21.0719	8.27758	14.9819	21.2051	11.2353	6.38885	12.8888	5.44727	3.92966	6.18724	2.89698	20.4756	15.6389	18.4333	11.7713	34.8347	25.2558	10.5407	5.39419	12.9132	7.33749	18.0486	6.16248	13.044	9.29525	7.82779	18.8743	92.1247	14.2844	4.4678	18.0906	19.1751
K01169	Unclassified	0.0124309	0.000368096	8.50223e-05	1.32265	0.000318583	0.000431913	0.000927443	0.00829168	0.0150399	0.600699	1.68494	1.56638	0.489042	0.601343	0.000318583	0.000608859	0.491082	0.000368096	0.000261969	0.250243	0.00872509	0.972024	0.000254867	9.9126e-05	0.000927543	1.44335	0.4824	0.000538041	2.29497	2.64681	0.721544	0.0145867	0.000502732	0.00026907	0.000786006	0.000127433	0.000615961	0.0003823	0.481961	0.722075	1.20756	1.20363	0.000226559	0.000212456	0.000906337
K01170	Unclassified	34.382	65.3026	0.0759356	10.0315	81.8053	88.5836	30.4434	65.4574	0.292552	40.6448	20.0668	0.98574	13.5973	5.82036	0.174219	42.118	4.66488	3.08995	1.2265	36.1491	3.95849	4.50261	45.7883	0.0312549	21.4008	14.8027	0.44141	2.2763	1.06402	20.9874	57.4256	32.1259	37.1587	0.166719	10.9748	0.179452	1.74143	0.431412	0.164236	0.241113	5.50548	1.49571	9.13177	24.3799	0.367652
K01173	ENDOG; endonuclease G, mitochondrial	13694.1	14989.8	8997.07	12112.3	10034.3	8546.84	11335.7	11557.9	14370.7	11410.6	12475.8	5398.87	13639.1	11873.1	12273.9	12514.2	8019.96	8211.83	11795.1	8665.33	10292.4	10678.2	11120.2	10248.1	11585.7	9256.14	8104.25	12425.4	10270.1	10401.1	7720.31	13259.6	7513.37	9497.79	8253.18	6783.26	9720.43	11016.3	6293.87	9161.84	6923.91	10307	12695.5	10725.6	13979.2
K01174	Unclassified	787.506	559.859	482.106	558.557	542.244	521.764	305.157	873.957	970.859	440.864	869.198	882.436	370.945	645.139	683.048	609.899	1110.97	608.971	318.736	477.445	634.511	425.361	663.141	462.64	614.769	613.938	620.947	546.943	826.839	853.334	737.058	539.14	719.461	468.826	1120.16	686.289	503.211	386.141	369.635	505.651	906.66	416.38	375.218	488.815	530.276
K01175	Unclassified	20.2129	20.7843	23.725	12.6643	18.1795	22.5962	18.4022	13.5832	13.9002	18.724	22.6106	11.3845	19.0747	15.254	19.4436	25.7157	8.23005	20.558	28.44	15.4618	15.2363	23.1347	14.1614	16.8755	19.1534	12.4484	12.6659	20.7403	9.04676	28.3365	10.3092	20.7325	6.05997	34.9679	78.8691	7.34553	28.8584	16.5417	10.2665	26.2137	35.5645	19.5263	18.9219	24.764	47.7422
K01176	AMY; alpha-amylase	2942.4	2705.97	2290.57	2720.42	2158.31	2265.68	2791.16	2369.24	3943.67	2527	3218.93	3343.86	3114.38	2886.89	2943.95	2799.97	3598.35	2476.88	2589.47	2198.53	2872.69	3238.64	2988.57	1969.44	2611.36	3142.77	3251.26	2611.56	3843.83	3337.05	2614.32	3030.94	2460.58	2331.41	3196.39	2279.89	2650.99	2937.9	2320.42	2899.86	3191.99	2181.19	2879.03	3091.16	2665.83
K01178	SGA1; glucoamylase	46.6136	57.1461	68.7517	32.9106	29.3608	19.1809	51.6382	85.3566	105.104	62.1162	77.6641	107.469	140.26	76.9496	36.7547	50.8006	84.2829	46.8397	45.0952	39.1915	41.0901	70.2941	49.1798	48.9302	34.8058	94.4715	79.8813	78.408	96.8607	114.837	59.062	40.565	82.7845	20.42	67.4114	44.341	96.6165	42.1938	49.3718	73.9985	121.444	70.323	52.1862	49.0874	38.4722
K01179	E3.2.1.4; endoglucanase	16876.4	18247.8	16929.2	16295.9	15387.5	15883.4	13916.8	19115.1	22577.7	15504.5	17765.1	28111	15381.3	17946.4	17717.6	19793.2	25610.5	18640.1	16343.2	14676.5	18675.3	17430.2	17395.4	14530.9	16153.5	20638.2	20781	18972.4	24133.2	24090.9	23695.6	15182.2	23348.9	14392.8	18616.7	15272.6	20584.5	14416	14081.3	16632.6	23182.2	14430.9	15970.7	16546.1	15159.1
K01180	Unclassified	0.0012024	0.000437453	0.000157144	0.00123748	0.000430045	0.000570993	0.00108384	0.00136998	0.000903097	0.000497971	0.00314838	0.00398726	0.000310221	0.00123524	0.000714297	0.00082418	0.00116843	0.000601043	0.000359333	0.000728762	0.00026251	0.000198201	0.000348181	0.000159091	0.00118122	0.000902605	0.0010097	0.000680975	0.00189081	0.0692193	0.000534178	0.000310576	0.000710267	0.000404287	0.00101859	0.00030408	0.000733494	0.000526588	0.000431453	0.00106686	0.0054145	0.000825825	0.000263956	0.000379252	0.00111366
K01181	Unclassified	7601.19	8121.02	6647.01	7575.36	6469.6	6311.78	5519.55	8122.74	8936.47	6848.82	7062.99	8291.96	6499.59	7580.08	7348.04	7667.58	9001.33	4914.65	5634.57	5915.03	7114.48	6317.69	7546.3	5282.91	7149.64	6764.78	6546.17	6923.32	8494.2	7806.6	8327.27	6080.03	8785.98	5119.88	7224.74	4988.65	8106.78	5824.79	4658.22	5980.39	6902.75	5734.36	5972.63	6886.71	7814.92
K01182	IMA; oligo-1,6-glucosidase	6471.38	5809.63	5984.68	6473.9	5833.59	6128.05	5394.26	8212.53	10222.7	5422.64	7604.38	8644.65	8651.13	5187.32	7212.05	7048.83	10779.8	4923.23	6310.19	6297.77	7364.36	6612.03	6903.84	6995.15	5458.36	6051.38	7935.55	6998	7766.12	6525.07	8538.48	8506.85	6865.74	5867.56	7905.01	6109.55	6156.9	7088.82	4935.35	7972.58	4391.45	4907.7	6780.81	6402.81	6529.57
K01183	E3.2.1.14; chitinase	4477.03	4251.77	3509.37	4034.18	3989.73	3930.08	4465.34	4313.03	5894.76	3648.37	4078.9	3420.54	4066.63	4796.32	4769.22	4456.43	3182.41	3995.46	5030.26	2858.16	4136.93	3932.92	3423.14	4945.72	3666.76	4587.86	3706.01	4825.94	4564.65	4575.22	3247.01	4652.04	2873.99	4827.31	2831.77	2750.28	3131.5	4581.38	2237.13	3794.79	3790.21	3516.54	5000.17	3848.7	4464.24
K01184	E3.2.1.15; polygalacturonase	0.0236311	0.00729447	0.0017587	0.0202385	0.00638097	0.00863504	0.0183547	0.025257	0.0199235	0.00763337	0.0527357	0.0556491	0.00745064	0.0203651	0.0606847	0.012198	0.0201725	0.00750976	0.00525454	0.0149043	0.00605764	0.00597301	0.00511023	0.00201869	0.0184847	0.0144994	0.0150274	0.0107169	0.0323662	0.0243035	0.00496796	0.010873	0.010111	0.00544333	0.0156873	0.00272619	0.0122083	0.00767103	0.00625503	0.0153619	0.0911285	0.278974	0.0044827	0.00437701	0.0180088
K01185	Unclassified	2718.76	2825.54	2021.98	2565.44	2331.17	2125.14	2647.76	3101.65	4837.84	2653.9	2515.93	2477.89	2826.45	3117.35	3566.88	2917.76	2385.96	2444.96	3284.18	2734.21	3419.16	2377.59	2772.46	2656.08	2196.13	2712.02	2800.66	2934.93	4664.84	2997.76	2495.7	3324.36	2590.33	3268.09	2233.65	2214.78	2374.14	2895.81	2021	3040.49	2454.8	2336.33	2838.67	2941.71	3902.76
K01186	NEU1; sialidase-1	10934.9	11917.7	7038.21	9365.62	8007.52	6896.49	8592.22	9076.65	11882.3	9223.84	9995.53	4425.06	10940.8	9322.08	10090.1	10401.7	6696.47	9246.94	9496.99	6955.59	8546.69	8065.74	8994.66	9136.05	9132.74	8088.09	6636.03	10636.5	8250.11	11633.4	6233.76	10665.3	6095.33	7954.13	6285.11	5303.8	7233.78	8986.62	5845.24	7257.75	8766.58	8560.97	10566.7	8528.51	11604.1
K01187	malZ; alpha-glucosidase	29438.7	30822.6	22092.8	26405.9	22522.5	22170.2	24884.3	27273.5	34538.4	23306.3	27484.1	20745.7	30345.5	26746.1	28575.5	27867.6	25069.2	20972.8	26944.5	19935.8	25075.4	25017.8	25463.7	24134.8	25364.6	22375.6	23208.8	28331.5	26189.1	27101.2	22579.7	29773.8	19945.4	26006.1	21801.9	17923.7	22809.9	27049.6	16329.3	24301.1	20005.1	22114.7	28897.3	25095	28783.1
K01188	E3.2.1.21; beta-glucosidase	13.1658	23.4663	6.42658	6.01945	14.1294	7.79475	9.71287	10.263	6.94214	14.1741	10.4814	6.96495	6.38535	10.4686	8.58165	15.5909	9.92786	14.5769	8.72085	7.60977	8.96279	14.2463	8.45033	5.86974	9.51189	11.9624	11.9947	3.71413	6.98655	21.1216	11.8958	7.36863	9.26907	8.36662	7.08382	12.0911	11.9871	5.35709	4.40967	12.574	46.1561	20.5937	7.63732	3.8545	7.51394
K01190	lacZ; beta-galactosidase	64006	66954.3	47215.3	57809.9	49636.7	47890.1	54622.3	61713.1	76418	52593.9	60489.1	44261.7	63608.2	57400.9	63434.5	62981.7	51851	51106.2	61717.4	44400.8	55267.5	51203.2	53310.7	55980.5	54173.1	52498	51477.3	61955.5	58344.5	64415.7	49845	65987.7	45384.8	56772.8	48924.4	38340.1	49662.9	59020.1	37994.8	51800.8	50537.9	48449.7	63347.7	56358.6	63749.2
K01191	MAN2C1; alpha-mannosidase	4221.08	3480.26	3947.38	4117.26	2953.38	3000.22	3611.23	4642.46	5629.83	3563.02	4732.07	6338.83	4500.87	4754.08	4658.98	3838.26	6453.01	3620.14	3339.04	3204.02	3831.41	4586.44	4218.4	3014.54	3969.63	4579.99	4526.4	4301.06	5706.27	5284.88	5405.65	3193.57	5281.44	3093.14	4110.67	3434.53	4217.95	3524.42	2775.46	4334.66	4553.38	3051.07	3154.43	3114.06	3857.5
K01192	E3.2.1.25; beta-mannosidase	6399.05	6506.85	5259.79	5339.96	5164.93	4804.12	5637.91	5868.5	7838.04	5039.29	5627.62	5292.78	6037.52	5854.84	6550.94	5969.32	4819.27	5454.87	6413.91	4465.79	5520.37	6497.24	4948.23	5964.34	5263.58	6429.05	5484.12	6409.19	6266.02	6057.92	4984.47	6545.07	4499.15	6393.19	4797.15	3652.14	5192.34	6539.26	3981.49	5715.3	5272.36	5202.45	6689.89	5385.22	5916.03
K01193	INV; beta-fructofuranosidase	10259.8	8502.46	7510.7	7688.34	7609.18	8028.97	6993.5	9368.29	13102.2	7621.32	9026.32	10492.2	10986.1	7615.16	8232.55	9942.81	13983.2	5733.71	7444.52	8073.21	9876.47	8370.83	9767.01	6864.95	8446.35	7199.72	9372.49	9180.7	11515	7888.38	9770.44	10157	8678.89	9332.75	8890.38	7430.13	7930	8659.1	6518.27	9672.85	5770.12	6788.73	7960.59	8587.31	9157.65
K01194	TREH; alpha,alpha-trehalase	330.18	545.772	305.726	323.646	218.984	294.578	326.421	507.484	673.127	486.587	298.948	434.759	564.42	381.351	724.034	625.158	270.961	749.026	609.894	300.67	416.997	449.568	420.24	316.285	406.133	364.222	328.286	672.307	355.648	627.191	378.522	401.358	559.105	414.235	398.686	191.721	387.798	327.122	680.866	491.658	291.747	434.755	372.219	342.125	534.73
K01195	uidA; beta-glucuronidase	1689.24	1547.67	1842.95	1837.15	1425.02	1513.92	1789.87	2030.59	3027.52	1698.93	1942.72	1973.75	2044.65	2180.95	2395.34	1720.21	2171.14	1716.97	1743.82	1477.4	2025.65	1850.11	2044.16	1569.41	1786.87	1538.16	1774.83	1921.59	2329.85	2291.05	2292.31	1452.4	2231.35	1655.76	1611.61	1624.2	1686.58	1474.87	1333.47	2145.8	1459.83	1510.84	1561.97	1591.36	2350.02
K01197	hya; hyaluronoglucosaminidase	8164.71	9211.9	6549.31	7666.19	6369.32	7494.24	6173.47	7957.16	11346.2	6201.94	8784.06	4053.48	9613.15	7022.7	8890.93	8807.64	5309.39	7507.68	8558.22	6055.9	7170.58	7006.81	6867.73	10703.3	6391.6	6190.43	7146.15	8457.5	6004.13	9770.64	6851.88	11339	5152.28	8027.71	8388.53	4761.32	6210.58	9184.49	5719.47	6568.57	6128.89	6559.62	10964.3	6865.32	8194.6
K01198	xynB; xylan 1,4-beta-xylosidase	2720.25	2396.14	2075.44	2243.31	1894.89	2171.72	1424.46	3161.27	3326.83	2229.93	2603.87	2734.62	2756.51	2053.71	2462.89	2410.22	3393.9	1828.2	2013.81	2018.54	2373.13	2364.17	2431.26	2054.46	2492.9	1908.05	2297.22	2402.9	2586.42	2463.32	2790.41	2901.12	2744.8	1689.4	2667.17	1798.75	2244.96	2274.55	1787.37	2189.25	2164.91	1871.31	1999.42	2094.02	2421.88
K01199	EGLC; glucan endo-1,3-beta-D-glucosidase	0.000267744	0.000104663	2.41749e-05	0.0002899	9.05847e-05	0.000122808	0.000263705	0.000318085	0.000197296	0.000108702	0.000756959	0.000785144	6.24281e-05	0.000291919	9.05847e-05	0.000173121	0.000233529	0.000104663	7.44871e-05	0.000150994	3.22237e-05	3.22237e-05	7.24678e-05	2.81851e-05	0.000263734	0.000207364	0.000213393	0.000152984	0.000408669	0.000348289	6.64383e-05	6.84576e-05	0.000142945	7.65064e-05	0.00022349	3.62339e-05	0.00017514	0.000108702	8.85939e-05	0.000217432	0.00130857	0.000191266	6.4419e-05	6.04088e-05	0.000257704
K01200	pulA; pullulanase	11700.4	10931.9	7396.18	9328.54	8727.16	8632.72	9105.46	9630.46	13804.3	9115.42	9615.34	6799.54	10953.4	9242.03	9988.66	11477.9	9990.51	7219.26	9843.37	7687.49	10415.4	8678.47	9759.89	9375.14	9058.36	8541.54	8523.76	10658.3	10140.6	8568.7	7742.47	11214.6	7396.6	11326.5	7572.11	6669.93	7623.52	10075.3	6594.11	9791.36	6173.18	8112.72	10744.1	9761.24	11035.5
K01201	GBA; glucosylceramidase	7054.26	7586.11	4849.8	6506.84	4915.64	4503.65	5793.54	6394.11	8512.74	6393.24	6642.81	4236.18	7303.24	6900.57	7463.85	6771.03	5494.98	4722.1	6106.23	5023.34	5791.84	6043.57	6733.72	5462.13	6513.64	5548.11	4803.34	7044.42	6540.74	6526.53	5465.9	6636.94	5146.81	4756.34	4776.11	3987.9	5699.06	5792.7	3529.47	5501.21	4481.61	5727.46	6509.64	5857.01	7309.14
K01202	GALC; galactosylceramidase	603.164	982.199	591.28	690.254	630.765	448.656	590.755	689.223	791.759	615.957	536.264	375.483	598.841	622.751	776.085	619.117	238.463	556.087	716.83	520.412	649.973	583.208	553.72	686.621	587.138	543.872	598.415	702.955	496.704	806.264	535.772	864.146	511.939	701.105	609.428	455.66	629.453	716.084	493.985	610.712	607.826	602.263	814.517	826.276	658.411
K01205	NAGLU; alpha-N-acetylglucosaminidase	7791.58	8535.91	5370.15	6710.85	6907.75	6330.89	7295.65	7631.85	9600.5	6304.1	6845.7	3715.44	6814.21	6857.29	8425.86	7576.54	2890.39	8288.71	8579.25	4905.4	6809.65	6130.88	5904.89	8449.8	5829.81	7034.68	5310.91	7823.31	6221.8	9164.77	4327.31	8615.25	4037.52	8728.75	4904.9	3894.52	5004.96	8394.26	4770.69	5861.77	7519.1	6327.34	8581.98	6612.58	7481.55
K01206	FUCA; alpha-L-fucosidase	40534.9	42676.6	26996.3	35271.2	32109.4	29205.3	35292.2	38597.5	46938.4	32655.9	34479.5	21211.4	35809	34592	39345	39126	21262.5	34228.1	41019.5	25626.7	34366.5	30733.5	29843.6	38950.5	30164.9	34060.1	28260	39266.7	32264.1	39112.1	24053.8	42849.5	22788.9	38355.2	26657.8	20860.7	26788.9	38401.2	21741	29058.2	32672	30201.4	42325.4	33896.2	38786.5
K01207	nagZ; beta-N-acetylhexosaminidase	7084.55	7406.87	6948.64	6296.56	6057.55	6335.56	6082.35	8038.01	9379.35	6031.61	7206.58	13150.9	6590.5	7244.66	7426.66	8394.62	12232.6	8496.55	6479.1	6715.72	8163.72	7272.2	7561.49	5691.31	6476.44	8431.98	9674.93	7615.61	11210.8	10692.8	11642.8	6683.87	9582.58	6842.91	7991.92	6933.08	8818.63	6309.55	5885.19	8040.87	10472.5	6308.7	6644.66	7135.93	6642.03
K01208	cd; cyclomaltodextrinase / maltogenic alpha-amylase / neopullulanase	3.81654	10.2954	2.00707	1.52374	11.0052	5.82996	5.40646	6.62017	7.10946	2.71498	11.1679	9.13943	7.32861	4.26862	4.61317	6.71336	7.46528	10.9995	2.50123	7.55315	10.9533	4.02278	5.24029	4.92048	8.27318	8.64987	10.1164	2.60528	9.38515	2.33158	15.556	9.75305	5.21743	8.29174	9.2527	3.8998	6.88903	2.40521	6.34437	6.60092	4.37377	6.11444	5.76658	12.7801	6.17821
K01209	abfA; alpha-L-arabinofuranosidase	12280.9	13125.9	9701.86	12770.8	8992.43	8433.3	10500.2	13503.8	13923.6	9823.18	11700.9	9747.7	12109.4	11087.5	12578.4	11550.1	9575.51	8455.92	11567.3	8213.22	9688	10570.6	10439.1	9027.48	10835.7	10089.4	10253.9	11832.3	10442.9	11726.5	9988.8	12423.3	9449.3	10063.1	11410	7011.74	11134.3	11677	7373.23	9576.29	10723.2	9305.71	10969.6	11609.5	11456.4
K01210	E3.2.1.58; glucan 1,3-beta-glucosidase	136.38	70.9092	171.354	82.9045	137.83	157.068	193.964	124.794	240.62	99.6791	118.652	281.572	230.689	100.002	213.403	225.878	187.526	161.438	128.312	148.108	115.555	184.735	76.5349	87.1388	71.4487	111.727	199.564	81.6723	221.687	132.92	109.694	305.572	98.6705	82.7827	321.674	56.829	260.913	209.495	117.735	151.381	69.9777	54.4197	91.2707	241.793	53.085
K01212	sacC; levanase	1064.98	1006.22	605.918	926.856	718.95	544.699	790.622	770.54	1054.49	921.27	1040.62	406.478	1068.68	853.62	916.778	924.3	885.304	398.797	651.884	681.237	707.211	776.197	928.617	642.025	992.561	587.43	561.832	784.923	920.111	670.324	674.92	905.37	641.106	388.712	618.14	581.499	712.489	728.497	420.856	655.135	357.551	791.053	705.996	758.938	1044.45
K01213	E3.2.1.67; galacturan 1,4-alpha-galacturonidase	0.00864608	0.00337982	0.000780664	0.00936154	0.00292519	0.00396577	0.00851567	0.0102717	0.00637114	0.00351023	0.024444	0.0253541	0.00201595	0.00942675	0.00292519	0.00559047	0.00754121	0.420507	0.0367766	0.00487593	0.00104058	0.00104058	0.00234015	0.000910162	0.00851658	0.00669626	0.00689097	0.00494022	0.430324	1.68259	0.00214545	0.00221066	0.00461602	0.00247057	0.00721701	0.00117008	0.00565568	0.00351023	0.0028609	0.00702138	0.876512	0.00617643	0.00208024	0.00195074	0.00832188
K01214	ISA; isoamylase	0.0935999	0.0365889	0.00845123	0.101345	0.0316673	0.0429323	0.092188	0.111198	0.068972	0.0380007	0.264623	0.274476	0.0218241	0.102051	0.0316673	0.0605208	0.0816389	0.0365889	0.0260397	0.0527854	0.011265	0.011265	0.0253338	0.00985314	0.092198	0.0724917	0.0745995	0.0534814	0.142866	0.121757	0.023226	0.0239319	0.0499716	0.0267457	0.0781291	0.0126669	0.0612267	0.0380007	0.0309713	0.0760114	0.45746	0.191689	0.02252	0.0211181	0.0900901
K01215	Unclassified	2564.18	2359.24	2261.4	2329.08	2899.95	2118	2652.92	3443.05	4093.91	2522.38	3107.83	3540.29	3290.78	2046.04	2908.96	3227.54	4797.01	1984.09	2838.47	2545.86	3455.58	2102.16	3073.87	2933.3	1931.85	2258.58	3198.38	2747.4	3720.99	2055.03	3125.23	2793.25	2929.76	3497.55	2314.96	3390.45	2314.74	2503.62	2053.85	3463.8	1286.69	1888.18	2337.02	2539.56	2704.61
K01216	Unclassified	6.36472	15.0217	27.1378	15.5554	0.146845	13.0728	21.9501	24.6856	20.976	9.87026	15.7069	16.1871	26.4739	31.3592	10.569	19.2357	8.53576	14.8004	17.0437	7.45515	13.2571	36.5564	16.0167	6.03176	20.583	22.4158	23.1191	18.7001	17.9352	20.3074	20.4274	6.69547	18.0579	12.2584	11.301	0.167718	26.9171	7.96455	21.4843	13.5904	14.713	12.7652	15.0718	8.58641	18.1976
K01217	IDUA; L-iduronidase	0.000311574	1.1922e-08	2.75371e-09	3.30219e-08	1.37802e-08	1.39889e-08	3.00381e-08	0.000194539	0.000389028	2.10418e-08	8.62236e-08	9.76946e-08	0.00019451	3.32519e-08	1.03183e-08	2.75168e-08	0.000233543	1.1922e-08	1.12382e-08	0.000272558	0.00023352	0.000233535	1.77774e-08	3.21051e-09	4.47621e-08	2.36204e-08	2.43072e-08	1.74261e-08	0.000233573	6.3541e-08	2.46827e-08	0.000389013	1.62825e-08	8.71469e-09	4.39329e-08	4.12733e-09	1.99498e-08	2.01789e-08	1.90444e-08	2.47672e-08	2.40223e-07	6.16138e-08	1.33987e-08	6.88104e-09	2.93546e-08
K01218	gmuG; mannan endo-1,4-beta-mannosidase	8650.42	9600.56	7095.11	8166.96	7332.5	6816.71	7504.22	7877.1	10091.2	7567.63	7469.71	6324.78	8746.86	8761.36	8414.92	8693.23	7283.19	6163.38	7747.61	5938.66	7809.66	7406.72	7869.71	7361.83	7902.42	7615.44	6673.98	8920.93	8009.13	8017.66	7374.86	8056.96	7071.98	6617.93	6465	4803.03	7621.27	7439.03	5118.34	6213.5	6147.35	6940.85	8289.11	7516.6	9180.72	involve in lipopolysaccharides synthesis
K01219	Unclassified	696.596	805.715	583.678	753.402	561.431	459.077	624.943	528.497	917.676	625.16	377.5	336.876	854.277	737.441	835.563	417.697	212.078	706.126	640.309	444.776	522.461	916.897	732.063	712.448	638.223	424.922	427.358	616.969	408.148	603.966	407.018	614.932	347.775	732.576	634.031	349.955	500.6	602.342	376.343	646.582	764.453	513.433	883.858	780.261	732.355
K01220	E3.2.1.85; 6-phospho-beta-galactosidase	328.457	184.569	237.863	256.415	259.956	234.498	191.938	419.157	575.443	145.891	233.892	387.459	296.884	284.301	455.303	310.504	798.112	204.534	214.602	384.928	451.694	269.215	298.534	139.339	248.269	292.634	474.938	288.905	622.663	345.664	472.506	587.231	449.579	242.397	573.075	446.307	341.142	245.839	327.758	563.356	311.064	313.492	201.75	361.992	349.69
K01222	E3.2.1.86A; 6-phospho-beta-glucosidase	2862.19	1833.51	2292.4	2138.1	2149.59	1844.75	1913.42	2981.27	3160.61	2429.59	3292.72	4389.44	2620.8	2706.03	2710.82	2724.91	4881.62	2597.95	2142.36	2278.98	2650.76	2553.63	2586.58	2097.03	2476.96	2542.42	3668.16	2513.89	3957.1	3359.51	3633.86	2098.63	3756.41	2297.7	3693.07	2403.33	2813.35	2265.27	2093.84	2861.13	3288.67	1973.08	1898.29	2276.84	2673.88
K01223	E3.2.1.86B; 6-phospho-beta-glucosidase	16756.5	11943.8	11541.3	11445.8	12223.2	14487.7	10323.7	14492	21295.2	11023.8	14922.2	18459.4	15459.4	11952	14119.4	16056.4	24704.4	10497.8	12710.4	13062.3	16052.7	12471.4	14205.1	13276.4	11941.6	12031.2	19242	13521	21973.2	14590.8	17406.6	16860.6	15731.5	19890.3	17079.8	13476.8	13064.6	14791.9	12678.9	18453.1	11831	10372.9	15079.7	14517.3	14179.4
K01224	Unclassified	4381.94	3954.16	3370	4142.84	3117.06	3680.36	3734.98	4568.93	4996.44	3271.24	4128.57	4456.05	3840.4	4232.9	4672.65	3540.16	4657.65	2290.29	3692.28	3246.37	4134.11	3587.82	3636.85	2833.1	3796.14	3725.08	3967.4	3857.29	5926.26	3710.69	4105.06	4489.54	3775.76	3207.4	3808.02	3219.23	3879.91	3826.48	2538.14	3939.01	2946.21	3472.47	3388.72	3848.8	4214.41
K01226	treC; trehalose-6-phosphate hydrolase	3528.61	3673.16	3295.84	3567.35	3561.16	3752.92	3282.25	4663.68	5836.52	3170.42	4641.85	5602.27	4807.42	3430.5	4468.35	4490.5	6684.12	3229.17	3924.33	3761.92	4285.54	3623.37	4065.92	4570.33	3108.25	3307.13	5022.95	4010.48	5321.29	4151.57	5456.22	4862.3	4430.49	4109.32	4594.64	4088.14	3556.61	3906.39	2966.93	4739.78	2479.76	3045.21	4102.37	3750.06	4395.89
K01227	ENGASE; mannosyl-glycoprotein endo-beta-N-acetylglucosaminidase	28.2785	31.7079	33.0849	24.3204	24.404	20.5181	42.6384	14.2512	38.2218	29.6053	49.6183	64.9334	24.6688	37.553	47.4081	31.965	237.61	8.90112	68.0447	26.2151	26.8396	24.1387	29.7251	17.1601	20.9096	43.5938	104.805	32.6599	102.809	38.7119	32.2458	27.8157	23.0067	18.496	41.3997	220.982	20.2174	38.8961	14.1867	38.5113	16.697	19.9822	23.7919	47.6767	38.873
K01230	MAN1A_C; mannosyl-oligosaccharide alpha-1,2-mannosidase	0.0302994	0.00198358	0.000458164	0.0054942	0.00171677	0.00232747	0.00499776	0.0217769	0.0352362	0.00206012	0.0143459	0.0148801	0.0169316	0.00553247	0.0214171	0.00328099	0.0233332	0.00198358	0.00141168	0.0249279	0.0195181	0.0195181	0.00137341	0.000534166	0.0049983	0.00392997	0.00404424	0.00289937	0.0266525	0.0066008	0.00125914	0.0327944	0.0027091	0.00144995	0.00423559	0.000686707	0.00331926	0.00206012	0.00167904	0.00412078	0.0248002	0.00362489	0.00122087	0.00114487	0.00488403
K01232	glvA; maltose-6'-phosphate glucosidase	3080.31	1628.88	2055.32	1915.42	1853.62	2631.77	1904.69	2808.14	3415.03	2485.3	2477.26	3436.06	2419.74	1758.48	1976.27	2434.01	5212.95	2088.92	2333.66	1942.65	2683.01	2118.72	3096.83	2039.95	2809.85	2254.7	3207.29	2413.98	3718	2379.67	2761.94	2734.85	3004.5	3534.68	3256.1	2297.74	2210.89	2495.99	2084.82	3243.3	2398.81	1881.26	2127.37	2338.62	2429.69
K01233	csn; chitosanase	201.154	113.536	114.22	144.223	128.76	140.864	159.218	225.372	204.912	181.764	229.835	318.782	169.909	154.07	236.106	153.855	440.782	188.564	170.846	178.828	208.182	127.988	159.243	166.08	170.561	158.122	268.706	158.38	399.213	205.437	283.295	137.505	370.445	196.013	129.383	191.6	202.318	123.354	170.545	338.875	196.169	181.861	125.122	194.178	295.768
K01235	maltose-6'-phosphate glucosidase	4279.94	4480.43	3015.94	4297.91	2874.66	2462.28	3283.29	4252.33	4256.73	3489.44	4087.7	2523.19	4217.06	3731.64	3808.98	3654.33	3398.25	2136.67	3041.52	2635.74	2838.77	3279.31	3624.89	2596.75	3973.32	2701.27	2778.12	3633.51	3280.04	3382.5	3063.54	3703.29	3036.89	2601.18	3278.42	2110.06	3592.81	3204.71	1851.95	2813.31	2858.03	3023.61	3190.38	3478.32	4248.85
K01236	treZ; maltooligosyltrehalose trehalohydrolase	69.2927	59.6729	52.2181	48.6721	50.5621	41.522	66	93.5412	91.3878	102.343	102.632	159.937	31.3189	52.9984	68.0938	69.232	67.2442	99.6424	32.4804	31.2139	51.0462	78.513	70.2553	32.2833	190.089	50.9973	45.2994	37.3298	99.3793	103.502	67.6722	47.4444	43.5627	35.7386	64.8008	46.7925	109.58	80.0047	39.5048	57.7576	229.611	180.542	18.5438	70.6772	54.1398
K01238	Unclassified	7.25064	2.51427	2.30508	2.52881	2.03981	0.391238	0.754557	1.94214	4.65208	1.38307	0.950166	2.52869	2.87806	1.88629	1.45261	2.05354	4.2053	1.36885	1.32721	2.66813	2.9339	2.29112	4.26084	0.293476	2.16526	2.45871	2.44475	2.80801	3.82811	0.83809	2.27716	5.25268	2.55669	3.00372	2.73822	0.963924	2.10965	2.45895	4.90363	4.69397	3.85603	2.2772	3.32485	2.03954	0.936063
K01239	E3.2.2.1; purine nucleosidase	4478.25	4053.43	3538.71	2881.56	3964.91	4113.14	3074.7	4155.92	6249.01	2948.36	4378.03	8568.37	3869.09	4521.8	4527.25	4804.08	8487.11	4076.8	3685.76	4768.5	5684.92	3954.59	4704.78	2772.95	3153.1	5316.42	6804.59	4447.96	8621.34	5268.39	7024.67	3851.68	6378.81	5652.33	4246.14	4792.18	4740.14	3931.41	4130.49	6346.15	5590.16	3652.81	3743.98	4750.24	4650.53
K01240	URH1; uridine nucleosidase	27.0244	42.599	28.0047	18.8158	28.653	35.2473	25.1551	26.6654	46.7444	28.0349	31.325	51.0099	43.0877	33.2145	30.0401	40.7893	38.2835	40.3855	36.6254	31.0078	30.218	29.7831	37.4359	20.9124	21.8693	38.2475	46.5587	43.5641	39.3291	37.0128	32.6215	23.3843	39.0772	30.9517	41.5286	26.5311	41.7966	28.7819	33.222	20.2749	39.145	24.9401	20.275	25.7397	22.9038
[truncated: 9,606 more rows]
[truncated: 2 more columns]
